# Supplementary material for: In-Depth Proteome Analysis Highlights HepaRG Cells as a Versatile Cell System Surrogate for Primary Human Hepatocytes
Source: MDPI journal article supplement (doi:10.3390/cells8020192), 2019-02-21
Supplement: s1 [file s1]

**Table S2. Total protein content, cell size and intracellular protein copy numbers of PHH, HepaRG, and HepG2 cells.**

| <b>cell system</b> | <b>total protein/cell [pg]<sup>a</sup></b> | <b>cell size [pI]<sup>b</sup></b> | <b>intracellular proteins [g/l]<sup>b</sup></b> | <b>total protein copies/cell<sup>b</sup></b> |
|--------------------|--------------------------------------------|-----------------------------------|-------------------------------------------------|----------------------------------------------|
| <b>PHH</b>         | 920 ± 59                                   | 6.4                               | 144 ± 17                                        | $1.3 \times 10^{10} \pm 1.3 \times 10^8$     |
| <b>HepaRG</b>      | 678 ± 62                                   | 2.6                               | 264 ± 38                                        | $1.1 \times 10^{10} \pm 5.0 \times 10^8$     |
| <b>HepG2</b>       | 420 ± 7                                    | 1.2                               | 365 ± 42                                        | $0.6 \times 10^{10} \pm 2.3 \times 10^7$     |

<sup>a</sup> experimentally measured in this study, <sup>b</sup> calculated using experimental measurements from this study.
