# Supplementary material for: In-Depth Proteome Analysis Highlights HepaRG Cells as a Versatile Cell System Surrogate for Primary Human Hepatocytes
Source: MDPI journal article supplement (doi:10.3390/cells8020192), 2019-02-21
Supplement: s1 [file s1]

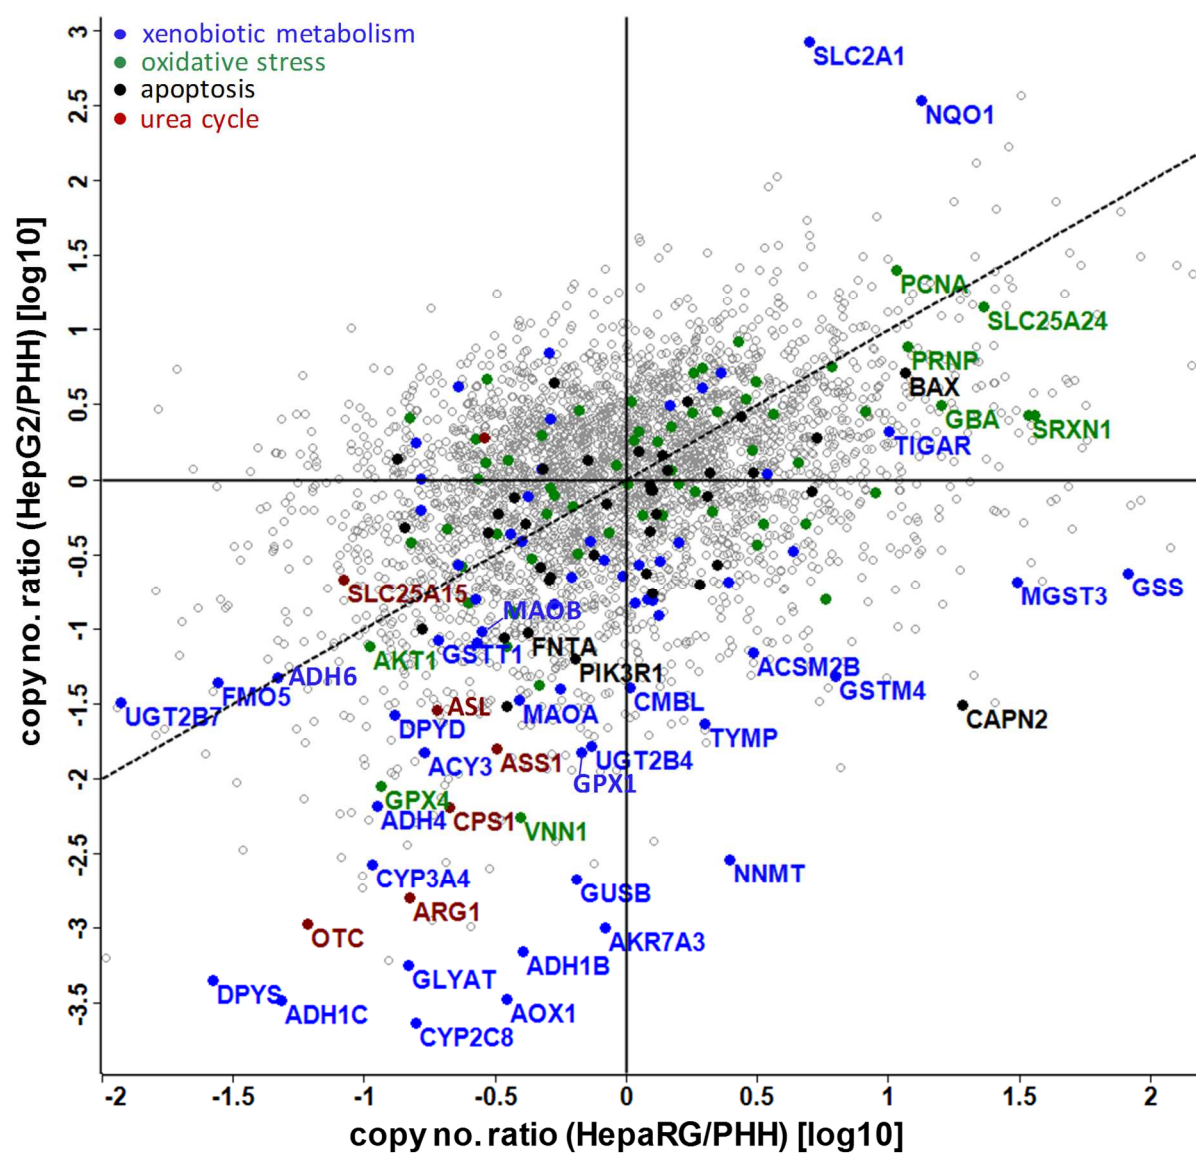

**Figure S6: Abundance ratio of detoxification-related proteins in the three cell systems.**

Based on estimated copy numbers (see text), the detoxification-related proteome of HepaRG cells was compared to that of PHH and HepG2 cells.
