# Supplementary material for: In-Depth Proteome Analysis Highlights HepaRG Cells as a Versatile Cell System Surrogate for Primary Human Hepatocytes
Source: MDPI journal article supplement (doi:10.3390/cells8020192), 2019-02-21
Supplement: s1 [file s1]

**Table S1. List of primers for RT-qPCR and antibodies for Western-blot analyses and immunocytochemistry**

| List of primers used for RT-qPCR                  |                |                                |          |         |
|---------------------------------------------------|----------------|--------------------------------|----------|---------|
| Gene                                              |                | Primer                         |          |         |
| SREBP1c                                           | Forward        | 5'-GCAGATCGCGGAGCCATGGATTGC-3' |          |         |
|                                                   | Reverse        | 5'-GAGGTGGAGACAAGCTGCCTGG-3'   |          |         |
| PEPCK                                             | Forward        | 5'-GCTCTGAGGAGGAGAATGG-3'      |          |         |
|                                                   | Reverse        | 5'-TGCTCTTGGGTGACGATAAC-3'     |          |         |
| TBP                                               | Forward        | 5'- AGACCATTGCACTTCGTGCC-3'    |          |         |
|                                                   | Reverse        | 5'-CCTGTGCACACCATTTCCTCC-3'    |          |         |
|                                                   |                |                                |          |         |
| List of antibodies used for Western-blot analysis |                |                                |          |         |
| Name                                              | Supplier       | Reference                      | Dilution | Species |
| IRS2                                              | Millipore      | #06-506                        | 1/1000   | Rabbit  |
| phospho-IRS2 [Ser731]                             | Abcam          | #ab3690                        | 1/1000   | Rabbit  |
| GSK3 beta                                         | Cell Signaling | #CS9315                        | 1/2000   | Rabbit  |
| phospho-GSK3 beta [Tyr216]                        | Abcam          | #ab75745                       | 1/2000   | Rabbit  |
| PKB                                               | Cell Signaling | #4691                          | 1/1000   | Rabbit  |
| phospho-PKB [Ser473]                              | Cell Signaling | #4060                          | 1/1000   | Rabbit  |
| Anti-rabbit IgG [H+L]-HRP conjugate               | Bio-Rad        | 172-1019                       | 1/10000  | Goat    |
|                                                   |                |                                |          |         |
| List of antibodies used for immunocytochemistry   |                |                                |          |         |
| Name                                              | Supplier       | Reference                      | Dilution | Species |
| ZO-1                                              | BD Bioscience  | 610966                         | 1/500    | Mouse   |
| HNF4                                              | Abcam          | AB41898                        | 1/2000   | Mouse   |
| β-catenin                                         | Cell Signaling | 9587                           | 1/500    | Rabbit  |
| Anti-mouse IgG [H+L] Alexa fluor 488              | Invitrogen     | A-10680                        | 1/500    | Goat    |
| Anti-rabbit IgG [H+L] Alexa fluor 647             | Invitrogen     | A-21245                        | 1/500    | Goat    |
