# Supplementary material for: In-Depth Proteome Analysis Highlights HepaRG Cells as a Versatile Cell System Surrogate for Primary Human Hepatocytes
Source: Cells. 2019 Feb 21;8(2):192. doi: 10.3390/cells8020192 (PMC6406872; doi:10.3390/cells8020192)
Supplement: Supplementary file 1 [file cells-08-00192-s001.zip]

Archive with 14 entries (14 files):
- cells-417497-supplementary_proofread.docx
- Figure S1_revised2.pdf
- Figure S2.pdf
- Figure S3.pdf
- Figure S4_revised2.pdf
- Figure S5_revised.pdf
- Figure S6.pdf
- Table S1_revised2.pdf
- Table S2_revised2.pdf
- Table S3_revised2.pdf
- Table S4_revised2.xlsx
- Table S5_revised2.xlsx
- Table S6_revised2.xlsx
- Table S7_revised2.pdf
