# Supplementary material for: In-Depth Proteome Analysis Highlights HepaRG Cells as a Versatile Cell System Surrogate for Primary Human Hepatocytes
Source: Cells. 2019 Feb 21;8(2):192. doi: 10.3390/cells8020192 (PMC6406872; doi:10.3390/cells8020192)
Supplement: Supplementary file 1 [file cells-08-00192-s001.zip › Table S4_revised2.xlsx]

## Sheet: Feuil1
In-depth proteome analysis highlights HepaRG cells as a versatile cell system surrogate to primary human hepatocytes
Georg Tascher, Audrey Burban, Sandrine Camus, Marine Plumel, Stéphanie Chanon, Remy Le Guevel, Valery Shevchenko, Alain Van Dorsselaer, Etienne Lefai, Christiane Guguen-Guillouzo and Fabrice Bertile
Table S4. Proteomics data for comparison of three different batches of cryopreserved, differentiated HepaRG cells.
	Identification															Quantitation												Statistical analysis (beta-binomial test (BBT) and inverted beta-binomial test for pairwise comparison with Bonferroni correction)
Protein information				Exclusive Unique Peptide Count												Spectrum Counts												BBT	Batch1 VS Batch2 (inverted BBT)			Batch1 VS Batch3 (inverted BBT)			Batch2 VS Batch3 (inverted BBT)
#	Identified Proteins (1155)	Accession Number	Molecular Weight	Batch1 replicate1	Batch1 replicate2	Batch1 replicate3	Batch1 replicate4	Batch2 replicate1	Batch2 replicate2	Batch2 replicate3	Batch2 replicate4	Batch3 replicate1	Batch3 replicate2	Batch3 replicate3	Batch3 replicate4	Batch1 replicate1	Batch1 replicate2	Batch1 replicate3	Batch1 replicate4	Batch2 replicate1	Batch2 replicate2	Batch2 replicate3	Batch2 replicate4	Batch3 replicate1	Batch3 replicate2	Batch3 replicate3	Batch3 replicate4	p.value	p-value	fold change	corrected p-value	p-value	fold change	corrected p-value	p-value	fold change	corrected p-value	protein statistically differential among batches
1	Superoxide dismutase [Mn], mitochondrial OS=Homo sapiens GN=SOD2 PE=1 SV=2	sp|P04179	25 kDa	10	9	8	8	9	8	7	9	8	8	7	10	219	230	319	183	307	239	250	245	216	188	177	194	0.00388744	0.112898	-1.17946	NS	0.240811	1.1688	NS	0.000913181	1.3813	0.00273954	+
2	Liver carboxylesterase 1 OS=Homo sapiens GN=CES1 PE=1 SV=2	sp|P23141	63 kDa	24	20	26	24	24	20	23	20	25	19	21	22	220	226	260	244	206	188	197	185	185	151	198	202	0.0188141	0.0166287	1.14597	0.0498862	0.0316988	1.24983	NS	0.197506	1.08967	NS	+
3	Glutathione S-transferase A1 OS=Homo sapiens GN=GSTA1 PE=1 SV=3	sp|P08263	26 kDa	6	5	5	6	5	5	5	3	4	6	6	5	116	161	195	186	107	115	63	125	191	212	115	166	0.0338927	0.027806	1.51128	NS	0.68868	-1.06537	NS	0.00115248	-1.63035	0.00345744	+
4	Alpha-enolase OS=Homo sapiens GN=ENO1 PE=1 SV=2	sp|P06733	47 kDa	14	15	15	14	17	18	15	15	16	16	18	17	159	134	191	153	173	145	123	113	138	138	155	124	0.169516	0.203307	1.08151	NS	0.0784625	1.10766	NS	0.670374	1.02825	NS
5	Annexin A2 OS=Homo sapiens GN=ANXA2 PE=1 SV=2	sp|P07355	39 kDa	17	19	20	20	19	19	21	18	22	18	21	17	131	114	133	122	138	123	105	113	140	106	131	103	0.905254	0.805848	-1.01588	NS	0.898413	1.0082	NS	0.676433	1.02735	NS
6	Peptidyl-prolyl cis-trans isomerase A OS=Homo sapiens GN=PPIA PE=1 SV=2	sp|P62937	18 kDa	11	10	10	10	11	11	10	11	11	11	11	11	127	101	109	107	139	99	80	83	117	97	101	105	0.851287	0.450214	1.0535	NS	0.71693	1.02502	NS	0.755529	-1.02322	NS
7	60 kDa heat shock protein, mitochondrial OS=Homo sapiens GN=HSPD1 PE=1 SV=2	sp|P10809	61 kDa	15	13	16	16	18	15	16	15	18	16	16	14	95	93	127	98	103	95	110	97	100	81	116	105	0.817357	0.452935	-1.05403	NS	0.851766	-1.0132	NS	0.558289	1.04212	NS
8	L-lactate dehydrogenase A chain OS=Homo sapiens GN=LDHA PE=1 SV=2	sp|P00338	37 kDa	14	11	14	14	10	13	9	11	14	11	10	12	90	68	127	48	84	65	48	52	83	77	54	58	0.432393	0.277151	1.21659	NS	0.497426	1.13973	NS	0.457696	-1.06733	NS
9	Fatty acid synthase OS=Homo sapiens GN=FASN PE=1 SV=3	sp|P49327	273 kDa	27	40	25	33	17	50	19	24	21	20	26	26	64	99	58	65	28	125	32	58	43	36	73	49	0.57631	0.271602	1.25802	NS	0.24303	1.36958	NS	0.838355	1.07358	NS
10	Tubulin beta chain OS=Homo sapiens GN=TUBB PE=1 SV=2	sp|P07437	50 kDa	15	16	16	15	16	13	15	15	15	12	15	14	72	56	70	79	83	69	56	77	67	47	65	72	0.279718	0.297253	-1.09213	NS	0.504526	1.05994	NS	0.100551	1.16566	NS
11	Retinal dehydrogenase 1 OS=Homo sapiens GN=ALDH1A1 PE=1 SV=2	sp|P00352	55 kDa	18	15	17	15	13	15	14	14	13	11	14	15	70	61	79	77	59	61	52	66	68	55	73	76	0.339974	0.166114	1.12916	NS	0.873625	1.01357	NS	0.243696	-1.109	NS
12	Tubulin alpha-1B chain OS=Homo sapiens GN=TUBA1B PE=1 SV=1	sp|P68363	50 kDa	12	10	13	11	12	10	12	13	11	13	10	12	71	59	72	71	76	69	68	73	75	58	66	70	0.382579	0.191927	-1.11699	NS	0.810033	-1.02089	NS	0.288605	1.09437	NS
13	Aldo-keto reductase family 1 member C1 OS=Homo sapiens GN=AKR1C1 PE=1 SV=1	sp|Q04828	37 kDa	11	12	13	13	11	10	13	10	12	13	12	10	80	63	97	69	70	37	56	58	73	69	73	63	0.0107619	0.0232399	1.30367	NS	0.390566	1.07361	NS	0.0717489	-1.22197	NS
14	Pyruvate kinase isozymes M1/M2 OS=Homo sapiens GN=PKM2 PE=1 SV=4	sp|P14618	58 kDa	14	16	18	15	15	15	15	16	14	14	17	14	65	69	88	67	60	64	58	61	55	49	63	52	0.0274195	0.225771	1.1113	NS	0.0167388	1.27266	NS	0.141498	1.1468	NS
15	Heat shock protein HSP 90-beta OS=Homo sapiens GN=HSP90AB1 PE=1 SV=4	sp|P08238	83 kDa	17	16	19	14	20	12	19	14	19	16	16	12	67	42	70	48	76	42	73	50	74	61	62	50	0.406499	0.158314	-1.13974	NS	0.207856	-1.12286	NS	0.989139	1.00144	NS
16	Peroxiredoxin-1 OS=Homo sapiens GN=PRDX1 PE=1 SV=1	sp|Q06830	22 kDa	10	9	9	9	11	10	12	9	10	7	10	9	55	33	43	49	57	51	43	38	55	48	44	47	0.47147	0.325614	-1.10929	NS	0.301904	-1.11284	NS	0.988975	1.00141	NS
17	Annexin A5 OS=Homo sapiens GN=ANXA5 PE=1 SV=2	sp|P08758	36 kDa	15	15	14	14	13	13	15	13	13	12	13	15	68	51	56	49	73	64	53	53	66	48	54	42	0.133896	0.149256	-1.14317	NS	0.699258	1.03784	NS	0.066565	1.18961	NS
18	Malate dehydrogenase, mitochondrial OS=Homo sapiens GN=MDH2 PE=1 SV=3	sp|P40926	36 kDa	10	10	11	11	11	13	9	9	9	9	10	12	72	44	64	59	83	65	54	55	67	53	56	58	0.248619	0.155573	-1.13637	NS	0.887099	-1.01316	NS	0.185325	1.12715	NS
19	Prostaglandin reductase 1 OS=Homo sapiens GN=PTGR1 PE=1 SV=2	sp|Q14914	36 kDa	9	10	13	9	9	8	10	10	8	10	11	10	53	66	80	57	52	61	52	49	68	52	61	61	0.438948	0.227853	1.11828	NS	0.862427	1.01983	NS	0.374609	-1.09642	NS
20	Aldehyde oxidase OS=Homo sapiens GN=AOX1 PE=2 SV=2	sp|Q06278	148 kDa	14	14	30	27	11	27	19	18	13	13	25	19	29	34	88	68	17	53	47	39	34	29	71	50	0.707269	0.239997	1.26804	NS	0.266613	1.11747	NS	0.565623	-1.14591	NS
21	Glyceraldehyde-3-phosphate dehydrogenase OS=Homo sapiens GN=GAPDH PE=1 SV=3	sp|P04406	36 kDa	6	7	10	8	9	5	8	6	8	7	8	7	63	70	52	53	67	58	56	53	66	46	58	58	0.829992	0.706236	-1.03769	NS	0.927235	1.01331	NS	0.557307	1.05617	NS
22	Triosephosphate isomerase OS=Homo sapiens GN=TPI1 PE=1 SV=3	sp|P60174	31 kDa	12	11	11	11	11	12	12	10	13	10	11	11	63	51	69	51	71	50	70	54	71	50	61	55	0.487778	0.210737	-1.12148	NS	0.614848	-1.04752	NS	0.484069	1.06588	NS
23	Elongation factor 1-alpha 1 OS=Homo sapiens GN=EEF1A1 PE=1 SV=1	sp|P68104 (+1)	50 kDa	7	9	8	9	8	8	9	7	8	9	9	8	62	32	55	57	56	40	27	39	59	45	56	48	0.113689	0.123666	1.20393	NS	0.625468	-1.04921	NS	0.0641195	-1.25225	NS
24	Peroxiredoxin-6 OS=Homo sapiens GN=PRDX6 PE=1 SV=3	sp|P30041	25 kDa	11	8	9	11	9	10	6	10	7	9	8	9	44	45	50	46	50	39	48	44	42	34	42	42	0.345326	0.667032	-1.04611	NS	0.308989	1.1161	NS	0.154593	1.16696	NS
25	Aldo-keto reductase family 1 member B10 OS=Homo sapiens GN=AKR1B10 PE=1 SV=2	sp|O60218	36 kDa	9	9	8	10	8	10	7	8	8	8	9	9	54	53	51	56	56	53	34	44	69	57	42	59	0.345573	0.403625	1.08731	NS	0.364999	-1.09024	NS	0.0835141	-1.18729	NS
26	Aldehyde dehydrogenase, mitochondrial OS=Homo sapiens GN=ALDH2 PE=1 SV=2	sp|P05091	56 kDa	14	12	13	14	12	13	10	12	11	13	13	12	59	38	62	62	57	45	44	48	53	50	47	52	0.76079	0.512124	1.06672	NS	0.591031	1.05374	NS	0.89917	-1.01283	NS
27	Elongation factor 2 OS=Homo sapiens GN=EEF2 PE=1 SV=4	sp|P13639	95 kDa	17	17	16	14	19	15	15	15	15	16	16	13	56	46	67	39	63	33	46	39	59	44	48	36	0.693631	0.464009	1.0774	NS	0.447527	1.0796	NS	0.958126	-1.00549	NS
28	Ubiquitin-like modifier-activating enzyme 1 OS=Homo sapiens GN=UBA1 PE=1 SV=3	sp|P22314	118 kDa	13	15	15	14	15	13	14	14	14	15	15	14	44	39	48	49	55	48	45	51	45	40	44	46	0.19696	0.110681	-1.17856	NS	0.936321	-1.00853	NS	0.128297	1.17061	NS
29	Transgelin-2 OS=Homo sapiens GN=TAGLN2 PE=1 SV=3	sp|P37802	22 kDa	9	8	9	10	10	9	9	9	9	8	7	8	58	28	52	47	72	50	42	40	68	42	31	50	0.549503	0.156172	-1.16497	NS	0.622367	-1.06382	NS	0.41179	1.08891	NS
30	Transketolase OS=Homo sapiens GN=TKT PE=1 SV=3	sp|P29401	68 kDa	11	9	10	9	10	9	8	11	8	14	9	9	44	36	45	41	53	36	47	46	45	41	49	40	0.350591	0.139909	-1.17193	NS	0.419604	-1.09147	NS	0.504642	1.07324	NS
31	Cytosolic 10-formyltetrahydrofolate dehydrogenase OS=Homo sapiens GN=ALDH1L1 PE=1 SV=2	sp|O75891	99 kDa	16	13	17	15	15	12	13	13	18	19	16	10	50	31	44	40	33	20	23	23	57	47	42	32	0.00035399	0.0033823	1.57142	0.00676459	0.340038	-1.10869	NS	0.00267016	-1.75209	0.00801049	+
32	Heat shock cognate 71 kDa protein OS=Homo sapiens GN=HSPA8 PE=1 SV=1	sp|P11142	71 kDa	13	13	17	16	14	12	16	13	10	10	18	11	41	29	61	46	52	34	53	42	40	34	50	26	0.222328	0.328385	-1.1091	NS	0.269245	1.13041	NS	0.0483707	1.25094	NS
33	Keratin, type II cytoskeletal 8 OS=Homo sapiens GN=KRT8 PE=1 SV=7	sp|P05787	54 kDa	11	11	11	12	12	11	7	11	10	10	8	10	48	29	30	55	51	36	27	38	49	40	31	38	0.991667	0.900803	1.0142	NS	0.958997	-1.00577	NS	0.875905	-1.01791	NS
34	Actin, cytoplasmic 1 OS=Homo sapiens GN=ACTB PE=1 SV=1	sp|P60709 (+1)	42 kDa	13	9	10	9	14	9	8	12	12	9	11	7	47	25	40	29	59	30	29	38	44	34	30	23	0.34203	0.187742	-1.16564	NS	0.695736	1.04864	NS	0.116143	1.21594	NS
35	Profilin-1 OS=Homo sapiens GN=PFN1 PE=1 SV=2	sp|P07737	15 kDa	8	5	6	6	6	6	5	5	5	6	6	6	32	32	38	35	39	34	38	37	30	37	38	39	0.492785	0.220502	-1.1566	NS	0.470718	-1.08999	NS	0.604881	1.06247	NS
36	78 kDa glucose-regulated protein OS=Homo sapiens GN=HSPA5 PE=1 SV=2	sp|P11021	72 kDa	11	12	16	14	14	12	14	14	12	14	16	12	60	39	67	47	71	39	56	51	57	49	58	47	0.685186	0.368545	-1.09082	NS	0.782733	-1.02718	NS	0.550771	1.05942	NS
37	Carbamoyl-phosphate synthase [ammonia], mitochondrial OS=Homo sapiens GN=CPS1 PE=1 SV=2	sp|P31327	165 kDa	8	12	26	18	3	15	18	11	11	12	26	16	17	22	67	39	5	28	53	19	23	18	68	35	0.609365	0.210896	1.3512	NS	0.595305	-1.06456	NS	0.271619	-1.43783	NS
38	Peroxiredoxin-5, mitochondrial OS=Homo sapiens GN=PRDX5 PE=1 SV=4	sp|P30044	22 kDa	6	7	8	7	6	8	6	7	7	7	8	7	41	32	32	34	44	30	27	27	38	39	29	29	0.979564	0.788858	1.03341	NS	0.965701	1.00522	NS	0.820115	-1.02847	NS
39	Protein disulfide-isomerase OS=Homo sapiens GN=P4HB PE=1 SV=3	sp|P07237	57 kDa	12	10	10	10	11	7	9	12	12	8	10	10	27	31	30	32	36	24	25	22	32	22	30	28	0.923337	0.669173	1.05855	NS	0.795371	1.03469	NS	0.893341	-1.0183	NS
40	UDP-glucose 6-dehydrogenase OS=Homo sapiens GN=UGDH PE=1 SV=1	sp|O60701	55 kDa	13	12	12	13	12	9	10	9	15	13	12	10	41	35	40	51	35	31	28	39	45	42	36	34	0.325724	0.157649	1.17836	NS	0.785615	1.03073	NS	0.238341	-1.14893	NS
41	Phosphatidylethanolamine-binding protein 1 OS=Homo sapiens GN=PEBP1 PE=1 SV=3	sp|P30086	21 kDa	7	6	8	6	7	7	7	8	8	7	6	7	47	30	40	30	51	39	31	33	61	42	34	35	0.30469	0.398657	-1.10242	NS	0.106563	-1.19863	NS	0.422797	-1.093	NS
42	Trypsin precursor - Sus scrofa	sp|P00761	24 kDa	3	3	3	3	3	3	3	3	3	3	3	3	36	30	30	39	39	32	40	32	27	33	31	39	0.500999	0.335663	-1.12932	NS	0.984544	1.00239	NS	0.312473	1.13667	NS
43	Peptidyl-prolyl cis-trans isomerase B OS=Homo sapiens GN=PPIB PE=1 SV=2	sp|P23284	24 kDa	7	6	7	6	8	4	5	7	8	9	5	7	40	27	33	32	47	23	19	23	43	32	25	23	0.732688	0.356577	1.12582	NS	0.712374	1.04733	NS	0.561842	-1.07872	NS
44	Leucine-rich PPR motif-containing protein, mitochondrial OS=Homo sapiens GN=LRPPRC PE=1 SV=3	sp|P42704	158 kDa	10	13	21	15	11	19	23	17	9	13	20	14	18	25	52	30	20	41	40	31	21	20	39	31	0.676901	0.237099	-1.15932	NS	0.624602	1.06593	NS	0.224771	1.23794	NS
45	Clathrin heavy chain 1 OS=Homo sapiens GN=CLTC PE=1 SV=5	sp|Q00610	192 kDa	6	5	15	17	3	24	17	16	9	12	20	15	12	7	36	36	5	50	40	40	22	27	49	34	0.476756	0.399252	-1.43898	NS	0.0384917	-1.61421	NS	0.745081	-1.11246	NS
46	Alcohol dehydrogenase 1B OS=Homo sapiens GN=ADH1B PE=1 SV=2	sp|P00325	40 kDa	8	6	7	8	5	4	3	4	10	8	8	9	36	23	36	34	20	16	14	15	39	32	39	31	1.66491e-05	0.00224827	1.86505	0.00449653	0.301713	-1.13416	NS	0.000843219	-2.10593	0.00252966	+
47	40S ribosomal protein S18 OS=Homo sapiens GN=RPS18 PE=1 SV=3	sp|P62269	18 kDa	7	7	7	7	6	7	7	7	6	6	7	7	44	25	31	33	42	32	35	34	37	30	31	36	0.513328	0.280687	-1.13902	NS	0.742601	-1.04106	NS	0.440528	1.0972	NS
48	Endoplasmin OS=Homo sapiens GN=HSP90B1 PE=1 SV=1	sp|P14625	92 kDa	12	5	11	10	15	9	9	8	12	11	14	8	53	20	40	32	55	26	39	27	47	41	41	29	0.667854	0.538392	-1.07484	NS	0.353101	-1.1354	NS	0.701465	-1.04493	NS
49	Isocitrate dehydrogenase [NADP] cytoplasmic OS=Homo sapiens GN=IDH1 PE=1 SV=2	sp|O75874	47 kDa	11	9	8	11	8	7	6	7	9	11	7	6	31	20	29	30	28	17	18	16	31	33	26	22	0.0681158	0.0640397	1.31277	NS	0.723705	-1.04865	NS	0.0370604	-1.37986	NS
50	Thioredoxin-dependent peroxide reductase, mitochondrial OS=Homo sapiens GN=PRDX3 PE=1 SV=3	sp|P30048	28 kDa	6	5	5	5	5	5	6	5	6	6	6	6	41	29	32	30	38	32	28	29	39	34	24	30	0.968373	0.908756	-1.01438	NS	0.908645	1.01438	NS	0.845235	1.02481	NS
51	Long-chain-fatty-acid--CoA ligase 1 OS=Homo sapiens GN=ACSL1 PE=1 SV=1	sp|P33121	78 kDa	8	10	16	11	8	8	15	12	9	7	10	9	18	23	41	23	26	16	38	23	22	16	37	21	0.889796	0.584646	-1.07895	NS	0.777056	1.04083	NS	0.422941	1.12043	NS
52	Cofilin-1 OS=Homo sapiens GN=CFL1 PE=1 SV=3	sp|P23528	19 kDa	7	6	6	6	6	5	7	7	7	7	7	6	33	32	32	31	40	30	31	28	32	30	31	28	0.741648	0.60131	-1.06751	NS	0.83504	1.02679	NS	0.460195	1.098	NS
53	Glycine amidinotransferase, mitochondrial OS=Homo sapiens GN=GATM PE=1 SV=1	sp|P50440	48 kDa	8	11	8	10	6	7	7	8	8	7	8	9	38	25	25	28	29	20	18	15	35	27	35	28	0.0194461	0.0403272	1.35194	NS	0.412643	-1.11147	NS	0.0139333	-1.48151	0.0417998	+
54	Hypoxia up-regulated protein 1 OS=Homo sapiens GN=HYOU1 PE=1 SV=1	sp|Q9Y4L1	111 kDa	7	10	13	11	7	11	14	8	8	7	14	10	17	23	42	25	20	28	44	20	14	16	38	27	0.730055	0.290748	-1.15386	NS	0.65573	1.0649	NS	0.202756	1.24015	NS
55	3-hydroxyacyl-CoA dehydrogenase type-2 OS=Homo sapiens GN=HSD17B10 PE=1 SV=3	sp|Q99714	27 kDa	10	6	9	10	10	11	6	10	11	9	9	10	33	15	38	28	45	30	13	28	48	22	26	31	0.781871	0.835547	-1.05305	NS	0.29636	-1.15817	NS	0.55057	-1.07969	NS
56	Keratin, type I cytoskeletal 19 OS=Homo sapiens GN=KRT19 PE=1 SV=4	sp|P08727	44 kDa	13	9	11	12	14	10	11	10	14	11	10	12	35	19	31	27	50	24	32	32	39	34	27	30	0.104227	0.03623	-1.30849	NS	0.164629	-1.19611	NS	0.497018	1.08659	NS
57	Phosphoenolpyruvate carboxykinase [GTP], mitochondrial OS=Homo sapiens GN=PCK2 PE=1 SV=3	sp|Q16822	71 kDa	10	9	12	10	9	8	9	10	9	9	11	10	29	26	40	28	21	17	30	25	32	23	44	23	0.252556	0.14999	1.21834	NS	0.79413	-1.03394	NS	0.0970895	-1.26043	NS
58	Alpha-actinin-4 OS=Homo sapiens GN=ACTN4 PE=1 SV=2	sp|O43707	105 kDa	10	9	12	12	15	8	13	10	12	14	11	5	28	19	33	26	42	22	37	26	39	37	31	17	0.206786	0.0585222	-1.28799	NS	0.267973	-1.19848	NS	0.716158	1.05973	NS
59	Enoyl-CoA hydratase, mitochondrial OS=Homo sapiens GN=ECHS1 PE=1 SV=4	sp|P30084	31 kDa	6	5	6	8	7	6	6	6	7	6	7	5	24	26	30	29	36	32	34	24	50	19	36	25	0.320022	0.109378	-1.23437	NS	0.423665	-1.18519	NS	0.893066	1.02251	NS
60	Vinculin OS=Homo sapiens GN=VCL PE=1 SV=4	sp|P18206	124 kDa	10	9	8	13	12	14	9	9	9	9	9	12	24	22	26	29	29	32	21	18	19	18	26	25	0.549801	0.747685	-1.04653	NS	0.510935	1.10062	NS	0.428025	1.16523	NS
61	Cathepsin D OS=Homo sapiens GN=CTSD PE=1 SV=1	sp|P07339	45 kDa	3	4	5	5	6	4	5	4	5	4	5	5	21	14	24	17	34	18	21	20	26	17	21	18	0.225384	0.0880833	-1.3015	NS	0.483282	-1.11816	NS	0.320326	1.16238	NS
62	Glucose-6-phosphate 1-dehydrogenase OS=Homo sapiens GN=G6PD PE=1 SV=4	sp|P11413	59 kDa	7	8	8	7	6	5	7	8	7	8	8	6	18	16	21	11	16	14	16	21	18	15	19	14	0.9031	0.653403	-1.08829	NS	0.857997	-1.03167	NS	0.787872	1.0478	NS
63	Ribonuclease UK114 OS=Homo sapiens GN=HRSP12 PE=1 SV=1	sp|P52758	14 kDa	5	6	6	6	5	5	6	6	5	6	5	7	27	32	34	31	28	27	32	33	29	39	33	34	0.614247	0.766188	-1.0389	NS	0.350437	-1.12324	NS	0.502418	-1.08778	NS
64	Annexin A4 OS=Homo sapiens GN=ANXA4 PE=1 SV=4	sp|P09525	36 kDa	9	11	11	11	9	9	9	8	10	9	9	8	28	22	30	19	36	23	24	23	27	24	22	17	0.384063	0.365656	-1.13503	NS	0.637877	1.071	NS	0.183957	1.2095	NS
65	Myosin-9 OS=Homo sapiens GN=MYH9 PE=1 SV=4	sp|P35579	227 kDa	11	14	2	15	7	24	3	16	11	14	6	11	20	27	2	30	13	59	5	30	22	21	12	19	0.838292	0.340029	-1.29804	NS	0.69672	-1.13271	NS	0.739281	1.12533	NS
66	Phosphoglycerate kinase 1 OS=Homo sapiens GN=PGK1 PE=1 SV=3	sp|P00558	45 kDa	8	7	9	9	11	10	8	9	7	8	8	7	24	25	27	28	34	26	27	20	32	23	27	24	0.801291	0.519234	-1.093	NS	0.704744	-1.05375	NS	0.780992	1.03886	NS
67	Non-specific lipid-transfer protein OS=Homo sapiens GN=SCP2 PE=1 SV=2	sp|P22307	59 kDa	8	7	10	8	4	5	6	8	7	7	8	6	23	20	36	27	16	11	13	19	19	24	25	21	0.00686944	0.0103616	1.66059	0.0310849	0.350727	1.1435	NS	0.0376366	-1.4608	NS	+
68	Fatty acid-binding protein, liver OS=Homo sapiens GN=FABP1 PE=1 SV=1	sp|P07148	14 kDa	4	5	6	6	4	5	5	6	4	5	4	6	20	29	25	29	20	13	18	21	20	22	24	28	0.146405	0.100531	1.33842	NS	0.696727	1.05721	NS	0.130305	-1.2663	NS
69	40S ribosomal protein S16 OS=Homo sapiens GN=RPS16 PE=1 SV=2	sp|P62249	16 kDa	4	5	6	3	5	4	6	7	5	5	5	4	17	11	18	9	17	12	13	16	17	19	16	10	0.691414	0.53383	-1.12447	NS	0.435837	-1.15528	NS	0.839101	-1.0378	NS
70	14-3-3 protein epsilon OS=Homo sapiens GN=YWHAE PE=1 SV=1	sp|P62258	29 kDa	7	7	7	9	8	8	8	8	8	7	7	8	25	18	23	27	31	21	20	22	24	26	20	21	0.864615	0.638214	-1.07134	NS	0.949287	-1.00944	NS	0.69179	1.06006	NS
71	Electron transfer flavoprotein subunit alpha, mitochondrial OS=Homo sapiens GN=ETFA PE=1 SV=1	sp|P13804	35 kDa	8	7	7	8	8	8	5	6	6	8	7	6	33	22	25	22	35	26	25	21	32	35	25	25	0.444189	0.474201	-1.10431	NS	0.237172	-1.17363	NS	0.642916	-1.06399	NS
72	60S ribosomal protein L12 OS=Homo sapiens GN=RPL12 PE=1 SV=1	sp|P30050	18 kDa	5	6	5	6	6	5	5	6	5	6	5	5	26	18	17	17	28	19	16	24	30	27	20	16	0.351941	0.315574	-1.16958	NS	0.205957	-1.21408	NS	0.769228	-1.04475	NS
73	Retinol-binding protein 4 OS=Homo sapiens GN=RBP4 PE=1 SV=3	sp|P02753	23 kDa	6	5	6	5	5	4	4	4	5	4	5	5	15	15	16	17	21	17	15	11	20	20	14	16	0.726943	0.68731	-1.0742	NS	0.446306	-1.14144	NS	0.714712	-1.06527	NS
74	Adenine phosphoribosyltransferase OS=Homo sapiens GN=APRT PE=1 SV=2	sp|P07741	20 kDa	7	5	6	6	9	6	6	6	5	9	5	4	25	18	20	16	25	18	16	17	28	27	16	17	0.623797	0.942672	-1.01165	NS	0.416388	-1.13427	NS	0.429745	-1.13153	NS
75	Flavin reductase (NADPH) OS=Homo sapiens GN=BLVRB PE=1 SV=3	sp|P30043	22 kDa	7	4	7	7	5	5	5	6	4	6	4	7	28	21	29	26	29	20	22	28	31	28	20	24	0.985545	0.911225	-1.01581	NS	0.889279	-1.01956	NS	0.912732	-1.01555	NS
76	Selenium-binding protein 1 OS=Homo sapiens GN=SELENBP1 PE=1 SV=2	sp|Q13228	52 kDa	9	9	9	9	8	7	8	7	9	10	9	7	22	23	25	17	16	15	14	17	27	20	23	17	0.128458	0.0967156	1.31986	NS	0.856551	-1.02782	NS	0.0683633	-1.36323	NS
77	Protein disulfide-isomerase A4 OS=Homo sapiens GN=PDIA4 PE=1 SV=2	sp|P13667	73 kDa	6	6	11	8	5	6	10	6	4	4	6	4	18	14	29	20	22	16	23	16	21	17	22	11	0.761242	0.848391	-1.03097	NS	0.570285	1.09669	NS	0.479258	1.12347	NS
78	Transitional endoplasmic reticulum ATPase OS=Homo sapiens GN=VCP PE=1 SV=4	sp|P55072	89 kDa	10	5	8	8	13	7	7	5	9	7	8	5	30	14	15	14	31	20	22	12	29	17	21	11	0.570021	0.222655	-1.21492	NS	0.593048	-1.09099	NS	0.469594	1.12007	NS
79	Heat shock protein HSP 90-alpha OS=Homo sapiens GN=HSP90AA1 PE=1 SV=5	sp|P07900	85 kDa	10	4	9	9	7	6	9	6	8	6	7	6	68	38	66	52	71	37	67	47	67	55	60	51	0.745441	0.51683	-1.06347	NS	0.430552	-1.07663	NS	0.841445	-1.01997	NS
80	Thiosulfate sulfurtransferase OS=Homo sapiens GN=TST PE=1 SV=4	sp|Q16762	33 kDa	7	6	5	5	7	5	4	6	6	5	5	7	24	18	16	13	22	18	12	18	23	23	16	18	0.632634	0.868942	-1.02824	NS	0.397686	-1.14787	NS	0.49916	-1.1169	NS
81	Acetyl-CoA acetyltransferase, mitochondrial OS=Homo sapiens GN=ACAT1 PE=1 SV=1	sp|P24752	45 kDa	7	7	7	8	7	7	6	8	8	8	6	8	26	22	21	23	27	22	20	15	29	24	20	23	0.76993	0.792603	1.04055	NS	0.636469	-1.07146	NS	0.471282	-1.11359	NS
82	Annexin A1 OS=Homo sapiens GN=ANXA1 PE=1 SV=2	sp|P04083	39 kDa	9	9	7	6	8	8	8	6	6	5	7	8	27	23	28	17	24	26	28	21	21	15	20	20	0.148759	0.460929	-1.11194	NS	0.217503	1.21038	NS	0.0632715	1.34744	NS
83	Glutathione S-transferase kappa 1 OS=Homo sapiens GN=GSTK1 PE=1 SV=3	sp|Q9Y2Q3	25 kDa	5	5	6	4	4	2	4	3	4	4	5	3	28	16	25	21	23	16	14	19	25	23	21	19	0.48846	0.294879	1.18002	NS	0.955602	-1.00839	NS	0.269339	-1.19151	NS
84	Acyl-coenzyme A synthetase ACSM2B, mitochondrial OS=Homo sapiens GN=ACSM2B PE=1 SV=2	sp|Q68CK6	64 kDa	11	6	10	10	10	5	2	6	11	6	10	6	14	13	15	18	20	9	3	12	17	12	17	9	0.430669	0.227028	1.36389	NS	0.780622	1.0534	NS	0.399774	-1.30101	NS
85	Stress-70 protein, mitochondrial OS=Homo sapiens GN=HSPA9 PE=1 SV=2	sp|P38646	74 kDa	6	7	12	8	5	6	9	10	5	6	12	5	15	18	31	23	18	15	32	20	18	13	33	15	0.86334	0.631995	-1.07596	NS	0.770444	1.04643	NS	0.442012	1.12769	NS
86	Aldo-keto reductase family 1 member C3 OS=Homo sapiens GN=AKR1C3 PE=1 SV=4	sp|P42330	37 kDa	4	4	5	4	3	4	6	5	5	5	5	3	63	43	69	50	58	40	45	49	64	53	55	50	0.459794	0.346107	1.09711	NS	0.831031	-1.02042	NS	0.232636	-1.12478	NS
87	Cytochrome c OS=Homo sapiens GN=CYCS PE=1 SV=2	sp|P99999	12 kDa	4	6	6	6	6	6	6	6	5	5	6	6	17	21	31	19	25	17	23	20	12	18	25	22	0.692113	0.784888	-1.04248	NS	0.56679	1.09352	NS	0.388813	1.14517	NS
88	Phosphoglucomutase-1 OS=Homo sapiens GN=PGM1 PE=1 SV=3	sp|P36871	61 kDa	5	7	8	7	6	7	7	7	5	7	3	5	14	18	24	17	20	20	21	19	17	27	14	18	0.633464	0.307703	-1.17978	NS	0.683443	-1.06918	NS	0.605774	1.08621	NS
89	Neuroblast differentiation-associated protein AHNAK OS=Homo sapiens GN=AHNAK PE=1 SV=2	sp|Q09666	629 kDa	9	23	9	6	0	12	3	9	0	0	18	7	13	34	12	8	0	13	5	14	0	0	26	10	0.159428	0.0901487	2.24247	NS	0.0151479	3.64301	0.0454437	0.48564	1.456	NS
90	Peroxiredoxin-2 OS=Homo sapiens GN=PRDX2 PE=1 SV=5	sp|P32119	22 kDa	7	6	4	6	5	5	5	5	4	5	5	3	33	21	21	26	29	27	23	26	33	24	23	21	0.757641	0.514488	-1.09529	NS	0.853177	-1.02641	NS	0.640317	1.06732	NS
91	D-dopachrome decarboxylase OS=Homo sapiens GN=DDT PE=1 SV=3	sp|P30046	13 kDa	4	4	5	5	4	4	5	3	4	4	6	5	19	14	27	20	18	14	21	18	15	18	26	18	0.931417	0.817894	1.03832	NS	0.965015	-1.00703	NS	0.799368	-1.04272	NS
92	L-xylulose reductase OS=Homo sapiens GN=DCXR PE=1 SV=2	sp|Q7Z4W1	26 kDa	7	6	5	6	6	5	5	6	6	7	6	6	18	21	25	21	17	21	21	18	21	22	18	21	0.96914	0.860713	1.02804	NS	0.979533	1.00398	NS	0.847554	-1.03099	NS
93	Ferritin light chain OS=Homo sapiens GN=FTL PE=1 SV=2	sp|P02792	20 kDa	3	2	4	3	4	3	3	4	4	5	3	6	24	15	20	21	23	17	17	21	28	22	22	22	0.39702	0.828234	-1.0352	NS	0.202802	-1.21358	NS	0.293236	-1.1744	NS
94	Guanine nucleotide-binding protein subunit beta-2-like 1 OS=Homo sapiens GN=GNB2L1 PE=1 SV=3	sp|P63244	35 kDa	9	7	10	8	8	8	6	8	9	6	9	6	19	13	18	21	20	19	12	14	26	13	15	13	0.985733	0.845366	1.03411	NS	0.883626	1.02527	NS	0.961178	-1.00851	NS
95	14-3-3 protein zeta/delta OS=Homo sapiens GN=YWHAZ PE=1 SV=1	sp|P63104	28 kDa	6	5	4	5	7	5	4	5	4	7	4	6	31	25	21	28	34	23	19	32	30	25	22	27	0.789367	0.571401	-1.08081	NS	0.89665	-1.01815	NS	0.66469	1.06138	NS
96	Trifunctional enzyme subunit alpha, mitochondrial OS=Homo sapiens GN=HADHA PE=1 SV=2	sp|P40939	83 kDa	6	9	13	12	9	8	14	9	7	6	14	7	8	13	33	24	17	12	30	16	13	9	31	11	0.759209	0.655395	-1.07502	NS	0.458385	1.1513	NS	0.21658	1.23371	NS
97	Serine--pyruvate aminotransferase OS=Homo sapiens GN=AGXT PE=1 SV=1	sp|P21549	43 kDa	8	8	7	7	8	6	5	7	8	8	8	8	20	13	16	11	16	12	8	10	27	23	24	18	0.000965123	0.259362	1.24684	NS	0.0113228	-1.57445	0.0226457	0.00338209	-1.94769	0.0101463	+
98	Keratin, type I cytoskeletal 18 OS=Homo sapiens GN=KRT18 PE=1 SV=2	sp|P05783	48 kDa	8	8	9	7	7	8	8	6	9	10	8	6	25	19	22	20	31	20	21	21	38	32	17	21	0.223217	0.371093	-1.14341	NS	0.104557	-1.27941	NS	0.371019	-1.13737	NS
99	Myosin light polypeptide 6 OS=Homo sapiens GN=MYL6 PE=1 SV=2	sp|P60660	17 kDa	3	5	6	5	4	3	4	4	4	6	5	5	14	14	18	12	17	9	11	11	13	13	17	15	0.692912	0.516217	1.1351	NS	0.841544	-1.03786	NS	0.413732	-1.17264	NS
100	Endoplasmic reticulum resident protein 29 OS=Homo sapiens GN=ERP29 PE=1 SV=4	sp|P30040	29 kDa	6	4	6	6	6	5	4	5	6	6	5	5	22	15	19	15	22	12	15	16	23	17	12	14	0.972677	0.857714	1.03131	NS	0.772311	1.05076	NS	0.972318	1.00609	NS
101	Ras GTPase-activating-like protein IQGAP1 OS=Homo sapiens GN=IQGAP1 PE=1 SV=1	sp|P46940	189 kDa	2	7	16	15	4	14	15	10	1	4	8	7	2	9	35	22	4	17	28	16	2	4	12	12	0.408858	0.604303	-1.09428	NS	0.0139874	2.08562	0.0419621	0.0154385	2.29857	0.0308769
102	Nicotinamide N-methyltransferase OS=Homo sapiens GN=NNMT PE=1 SV=1	sp|P40261	30 kDa	7	4	5	5	6	5	6	7	7	7	3	6	22	12	15	19	17	16	15	19	25	17	9	13	0.907777	0.796408	-1.0455	NS	0.826799	1.03887	NS	0.675233	1.08769	NS
103	Electron transfer flavoprotein subunit beta OS=Homo sapiens GN=ETFB PE=1 SV=3	sp|P38117	28 kDa	4	3	4	4	4	4	3	4	5	5	3	5	11	9	7	9	12	16	9	10	18	14	9	12	0.125983	0.159678	-1.36407	NS	0.0576834	-1.50143	NS	0.628851	-1.10165	NS
104	Peroxisomal bifunctional enzyme OS=Homo sapiens GN=EHHADH PE=1 SV=3	sp|Q08426	79 kDa	8	11	10	7	5	6	8	7	8	7	9	6	12	16	26	14	5	11	17	12	16	15	18	10	0.293258	0.0975512	1.372	NS	0.552689	1.11142	NS	0.309515	-1.27302	NS
105	Delta(3,5)-Delta(2,4)-dienoyl-CoA isomerase, mitochondrial OS=Homo sapiens GN=ECH1 PE=1 SV=2	sp|Q13011	36 kDa	6	5	6	4	6	4	5	6	5	6	5	5	18	16	18	13	30	11	15	12	19	16	14	13	0.749921	0.587712	-1.10005	NS	0.900377	1.02249	NS	0.516868	1.12054	NS
106	2,4-dienoyl-CoA reductase, mitochondrial OS=Homo sapiens GN=DECR1 PE=1 SV=1	sp|Q16698	36 kDa	6	4	6	6	7	4	4	4	5	7	5	7	16	13	17	15	19	11	11	12	17	18	17	14	0.582767	0.659736	1.08629	NS	0.535889	-1.11629	NS	0.29658	-1.21179	NS
107	Sepiapterin reductase OS=Homo sapiens GN=SPR PE=1 SV=1	sp|P35270	28 kDa	6	4	6	5	7	6	4	6	7	6	5	5	23	16	17	20	21	19	11	16	27	18	15	19	0.71828	0.634918	1.08292	NS	0.680982	-1.06835	NS	0.38257	-1.15588	NS
108	Ubiquitin-40S ribosomal protein S27a OS=Homo sapiens GN=RPS27A PE=1 SV=2	sp|P62979	18 kDa	2	3	3	4	3	1	4	5	2	2	3	5	7	11	13	16	9	8	14	18	9	12	15	19	0.74299	0.519024	-1.14097	NS	0.297755	-1.22958	NS	0.684795	-1.083	NS
109	Transaldolase OS=Homo sapiens GN=TALDO1 PE=1 SV=2	sp|P37837	38 kDa	4	5	6	5	5	4	5	5	5	3	5	5	17	17	22	15	13	13	18	16	15	10	18	18	0.756826	0.598673	1.09678	NS	0.526541	1.11689	NS	0.91687	1.01917	NS
110	Catalase OS=Homo sapiens GN=CAT PE=1 SV=3	sp|P04040	60 kDa	6	8	6	7	5	5	6	6	6	3	7	6	21	20	22	24	12	13	11	13	23	16	17	17	0.0128666	0.00846012	1.66797	0.0253803	0.367509	1.15366	NS	0.0497689	-1.45033	NS	+
111	Bile salt sulfotransferase OS=Homo sapiens GN=SULT2A1 PE=1 SV=3	sp|Q06520	34 kDa	5	6	6	5	5	7	5	4	6	6	7	5	15	18	19	15	14	14	11	9	17	15	20	14	0.238462	0.143439	1.31726	NS	0.917955	-1.01805	NS	0.130648	-1.33005	NS
112	Aconitate hydratase, mitochondrial OS=Homo sapiens GN=ACO2 PE=1 SV=2	sp|Q99798	85 kDa	7	5	9	5	6	4	7	7	6	5	6	4	18	11	16	10	19	8	15	14	14	13	23	8	0.877476	0.666525	-1.08543	NS	0.64225	-1.09144	NS	0.991693	1.00195	NS
113	Cathepsin B OS=Homo sapiens GN=CTSB PE=1 SV=3	sp|P07858	38 kDa	4	4	4	4	4	4	4	4	4	2	4	3	18	10	22	16	27	14	20	20	26	18	24	16	0.166615	0.0951158	-1.31847	NS	0.0881244	-1.3227	NS	0.958431	-1.00815	NS
114	10 kDa heat shock protein, mitochondrial OS=Homo sapiens GN=HSPE1 PE=1 SV=2	sp|P61604	11 kDa	3	3	4	6	3	4	3	4	2	4	4	4	10	11	20	24	12	14	15	21	8	18	15	18	0.933154	0.817856	-1.04182	NS	0.790054	1.04908	NS	0.639391	1.08898	NS
115	40S ribosomal protein S10 OS=Homo sapiens GN=RPS10 PE=1 SV=1	sp|P46783	19 kDa	4	2	3	3	2	4	3	4	4	4	3	3	23	16	17	17	22	21	17	16	22	15	13	18	0.680707	0.577173	-1.09585	NS	0.797116	1.04432	NS	0.41595	1.14538	NS
116	14-3-3 protein theta OS=Homo sapiens GN=YWHAQ PE=1 SV=1	sp|P27348	28 kDa	7	6	5	6	6	5	5	5	5	8	5	6	27	26	21	28	31	23	17	30	28	30	20	23	0.930882	0.773718	-1.04126	NS	0.925244	-1.01327	NS	0.872849	1.02279	NS
117	ADP-ribosylation factor 4 OS=Homo sapiens GN=ARF4 PE=1 SV=3	sp|P18085	21 kDa	6	4	5	5	6	6	4	5	4	3	5	4	16	9	15	11	19	20	9	14	15	14	12	5	0.196967	0.216931	-1.27445	NS	0.697081	1.08241	NS	0.107597	1.38247	NS
118	Lysosomal alpha-glucosidase OS=Homo sapiens GN=GAA PE=1 SV=4	sp|P10253	105 kDa	3	4	4	5	4	5	3	5	4	4	5	3	17	14	15	18	22	17	17	17	18	21	13	17	0.523663	0.266222	-1.20986	NS	0.556602	-1.10748	NS	0.621531	1.08645	NS
119	Tubulin beta-4B chain OS=Homo sapiens GN=TUBB4B PE=1 SV=1	sp|P68371	50 kDa	4	4	4	4	4	4	4	4	5	4	4	4	70	55	63	75	82	57	54	73	69	43	61	69	0.500733	0.420472	-1.07273	NS	0.619285	1.0453	NS	0.179365	1.1267	NS
120	Heat shock protein beta-1 OS=Homo sapiens GN=HSPB1 PE=1 SV=2	sp|P04792	23 kDa	4	3	3	5	4	4	4	4	4	5	5	4	17	11	12	22	19	11	20	17	21	18	19	16	0.463305	0.415315	-1.1595	NS	0.218049	-1.23598	NS	0.687062	-1.0703	NS
121	Malate dehydrogenase, cytoplasmic OS=Homo sapiens GN=MDH1 PE=1 SV=4	sp|P40925	36 kDa	4	6	6	5	4	3	4	3	5	5	7	2	12	13	13	12	12	9	9	9	17	14	18	7	0.278922	0.373282	1.20922	NS	0.47007	-1.15092	NS	0.114949	-1.38969	NS
122	UDP-glucose:glycoprotein glucosyltransferase 1 OS=Homo sapiens GN=UGGT1 PE=1 SV=3	sp|Q9NYU2	177 kDa	1	7	10	11	6	12	9	6	3	6	6	8	1	13	22	22	8	20	20	11	3	10	13	12	0.560048	0.487024	-1.2149	NS	0.0902899	1.4351	NS	0.0407384	1.63374	NS
123	Carboxymethylenebutenolidase homolog OS=Homo sapiens GN=CMBL PE=1 SV=1	sp|Q96DG6	28 kDa	3	4	2	5	2	4	2	5	4	7	4	5	9	11	5	10	3	11	4	10	11	16	9	14	0.142608	0.480244	1.19575	NS	0.0849769	-1.4578	NS	0.0261711	-1.73553	NS
124	Aldo-keto reductase family 1 member C2 OS=Homo sapiens GN=AKR1C2 PE=1 SV=3	sp|P52895	37 kDa	2	2	2	3	3	1	3	1	3	3	2	2	66	45	79	56	57	24	38	38	62	55	62	58	0.00197389	0.00718292	1.46313	0.0215488	0.995146	-1.00055	NS	0.0153	-1.4763	0.0306	+
125	Heat shock 70 kDa protein 1A/1B OS=Homo sapiens GN=HSPA1A PE=1 SV=5	sp|P08107	70 kDa	8	5	10	6	8	4	9	8	7	7	10	5	26	20	35	23	29	20	35	27	26	23	39	18	0.66624	0.284046	-1.15773	NS	0.66476	-1.0617	NS	0.525665	1.09005	NS
126	Protein disulfide-isomerase A3 OS=Homo sapiens GN=PDIA3 PE=1 SV=4	sp|P30101	57 kDa	8	6	6	5	6	6	5	2	7	4	5	3	13	12	12	13	10	8	11	7	14	5	11	6	0.319661	0.223281	1.30368	NS	0.17754	1.34465	NS	0.892744	1.03231	NS
127	Glucose-6-phosphate isomerase OS=Homo sapiens GN=GPI PE=1 SV=4	sp|P06744	63 kDa	5	4	5	6	4	4	6	5	4	5	6	4	17	10	18	21	17	14	17	14	19	12	17	14	0.982075	0.954531	-1.01016	NS	0.910604	1.02007	NS	0.862476	1.03162	NS
128	40S ribosomal protein S3 OS=Homo sapiens GN=RPS3 PE=1 SV=2	sp|P23396	27 kDa	5	5	4	5	5	4	3	4	7	5	4	5	16	11	12	17	10	10	9	12	19	18	10	12	0.237435	0.218894	1.2864	NS	0.685984	-1.07841	NS	0.109333	-1.40504	NS
129	Moesin OS=Homo sapiens GN=MSN PE=1 SV=3	sp|P26038	68 kDa	6	4	5	7	5	3	7	4	3	4	6	3	16	14	14	14	14	9	16	12	12	9	17	11	0.784236	0.748756	1.0635	NS	0.495476	1.14133	NS	0.697512	1.08089	NS
130	Adenylate kinase 2, mitochondrial OS=Homo sapiens GN=AK2 PE=1 SV=2	sp|P54819	26 kDa	4	4	5	3	5	3	3	5	5	7	4	4	16	12	10	9	22	7	8	11	12	21	13	12	0.537487	0.779242	-1.05932	NS	0.249193	-1.2543	NS	0.502602	-1.21909	NS
131	40S ribosomal protein S13 OS=Homo sapiens GN=RPS13 PE=1 SV=2	sp|P62277	17 kDa	4	5	2	2	5	5	4	4	4	4	5	3	7	5	7	3	13	12	5	7	12	11	6	7	0.059621	0.0484259	-1.74504	NS	0.06047	-1.66289	NS	0.843531	1.04731	NS
132	Nucleoside diphosphate kinase B OS=Homo sapiens GN=NME2 PE=1 SV=1	sp|P22392	17 kDa	2	2	2	3	2	3	1	3	2	2	2	3	10	5	7	11	13	4	4	3	8	4	11	8	0.584758	0.303147	1.32409	NS	0.956883	1.01363	NS	0.410003	-1.30825	NS
133	Serum albumin OS=Homo sapiens GN=ALB PE=1 SV=2	sp|P02768	69 kDa	6	6	10	8	4	4	7	6	7	6	8	4	8	9	12	10	5	10	11	6	10	10	15	5	0.708502	0.621934	1.12486	NS	0.784294	-1.0636	NS	0.45806	-1.19199	NS
134	GTP-binding nuclear protein Ran OS=Homo sapiens GN=RAN PE=1 SV=3	sp|P62826	24 kDa	2	3	4	2	4	3	4	4	3	2	4	2	13	8	19	10	15	12	13	14	16	13	18	8	0.729546	0.437045	-1.16507	NS	0.49534	-1.14256	NS	0.937399	1.01517	NS
135	UMP-CMP kinase OS=Homo sapiens GN=CMPK1 PE=1 SV=3	sp|P30085	22 kDa	5	4	4	4	6	5	4	4	5	5	3	4	14	10	8	11	9	10	6	7	16	11	7	6	0.57509	0.274979	1.28925	NS	0.794141	1.05904	NS	0.392825	-1.22405	NS
136	3-ketoacyl-CoA thiolase, mitochondrial OS=Homo sapiens GN=ACAA2 PE=1 SV=2	sp|P42765	42 kDa	5	5	3	6	7	4	3	6	4	6	4	4	16	10	10	13	20	10	6	11	15	14	13	9	0.931565	0.981247	1.00482	NS	0.745478	-1.06715	NS	0.761312	-1.06336	NS
137	Dihydropyrimidinase-related protein 2 OS=Homo sapiens GN=DPYSL2 PE=1 SV=1	sp|Q16555	62 kDa	10	7	6	7	8	5	5	5	8	4	6	5	22	16	21	12	17	11	13	10	16	11	13	11	0.193904	0.134062	1.31515	NS	0.097051	1.35382	NS	0.888796	1.02809	NS
138	Peroxisomal multifunctional enzyme type 2 OS=Homo sapiens GN=HSD17B4 PE=1 SV=3	sp|P51659	80 kDa	4	5	6	5	4	5	7	5	7	7	7	5	12	13	18	13	13	8	17	9	20	13	20	11	0.336713	0.636174	1.0982	NS	0.354164	-1.1847	NS	0.154635	-1.31272	NS
139	Protein disulfide-isomerase A6 OS=Homo sapiens GN=PDIA6 PE=1 SV=1	sp|Q15084	48 kDa	3	6	6	5	5	6	6	5	4	4	5	5	14	14	14	15	23	13	17	11	15	13	10	14	0.411075	0.339646	-1.19014	NS	0.744565	1.06452	NS	0.218154	1.26252	NS
140	Glutathione S-transferase omega-1 OS=Homo sapiens GN=GSTO1 PE=1 SV=2	sp|P78417	28 kDa	4	4	3	3	4	3	2	3	4	4	4	4	13	13	10	8	12	8	8	8	14	13	12	11	0.386821	0.490681	1.1675	NS	0.471744	-1.16037	NS	0.165141	-1.35205	NS
141	Coatomer subunit alpha OS=Homo sapiens GN=COPA PE=1 SV=2	sp|P53621	138 kDa	0	1	7	10	0	6	10	3	1	1	14	7	0	1	15	17	0	12	25	5	2	2	28	10	0.794938	0.414833	-1.51834	NS	0.343538	-1.40959	NS	0.953728	1.02939	NS
142	Glutamate dehydrogenase 1, mitochondrial OS=Homo sapiens GN=GLUD1 PE=1 SV=2	sp|P00367	61 kDa	6	6	6	5	8	6	5	7	5	4	7	4	10	13	10	9	13	10	12	16	8	6	13	10	0.232835	0.226471	-1.29312	NS	0.693444	1.09837	NS	0.098539	1.42547	NS
143	40S ribosomal protein S8 OS=Homo sapiens GN=RPS8 PE=1 SV=2	sp|P62241	24 kDa	3	3	3	4	5	5	3	4	5	5	3	4	11	12	10	15	14	14	18	15	21	15	18	12	0.136866	0.116169	-1.36319	NS	0.0942654	-1.41721	NS	0.799109	-1.04625	NS
144	Protein DJ-1 OS=Homo sapiens GN=PARK7 PE=1 SV=2	sp|Q99497	20 kDa	2	5	7	4	2	4	4	2	5	3	5	3	10	14	17	8	9	10	13	7	13	10	16	10	0.617227	0.475647	1.16537	NS	0.864735	-1.03505	NS	0.378955	-1.20728	NS
145	Keratin, type II cytoskeletal 1 OS=Homo sapiens GN=KRT1 PE=1 SV=6	sp|P04264	66 kDa	2	5	4	9	5	6	4	7	3	3	7	5	6	21	11	21	15	24	9	16	9	7	19	21	0.812135	0.472265	-1.13869	NS	0.981273	1.0077	NS	0.591874	1.19997	NS
146	Calreticulin OS=Homo sapiens GN=CALR PE=1 SV=1	sp|P27797	48 kDa	5	5	5	4	5	2	3	3	4	3	3	3	13	13	14	11	13	8	16	11	11	8	15	14	0.986861	0.952189	-1.01216	NS	0.917941	1.02096	NS	0.857172	1.03744	NS
147	40S ribosomal protein S19 OS=Homo sapiens GN=RPS19 PE=1 SV=2	sp|P39019	16 kDa	4	3	3	3	4	4	4	4	4	4	3	3	14	12	10	9	15	12	11	9	13	12	10	8	0.825097	0.665434	-1.09456	NS	0.899988	1.02719	NS	0.579691	1.12397	NS
148	Single-stranded DNA-binding protein, mitochondrial OS=Homo sapiens GN=SSBP1 PE=1 SV=1	sp|Q04837	17 kDa	4	4	4	4	4	4	4	3	4	5	3	3	10	13	19	17	20	13	15	11	13	14	17	11	0.865001	0.698812	-1.074	NS	0.874313	1.03012	NS	0.581417	1.10888	NS
149	Serotransferrin OS=Homo sapiens GN=TF PE=1 SV=3	sp|P02787	77 kDa	6	7	8	8	6	5	9	3	3	4	11	5	10	10	15	12	11	7	18	5	10	7	19	9	0.921681	0.789212	1.06475	NS	0.979009	-1.00551	NS	0.839749	-1.04464	NS
150	Carbonyl reductase [NADPH] 1 OS=Homo sapiens GN=CBR1 PE=1 SV=3	sp|P16152	30 kDa	5	7	4	8	5	9	5	5	4	4	7	7	13	15	8	17	12	16	12	11	14	12	14	12	0.991961	0.953534	-1.01152	NS	0.960406	-1.00975	NS	0.946041	1.01344	NS
151	Haptoglobin OS=Homo sapiens GN=HP PE=1 SV=1	sp|P00738	45 kDa	6	5	7	6	6	6	4	4	5	7	5	4	19	13	14	16	20	15	11	9	16	15	14	9	0.853072	0.685589	1.07798	NS	0.545164	1.1192	NS	0.813215	1.04633	NS
152	40S ribosomal protein S9 OS=Homo sapiens GN=RPS9 PE=1 SV=3	sp|P46781	23 kDa	5	3	3	4	5	4	4	5	3	4	3	3	14	4	7	7	13	9	7	9	10	9	8	7	0.613399	0.369804	-1.24002	NS	0.724352	-1.0908	NS	0.566825	1.14471	NS
153	Myosin regulatory light chain 12B OS=Homo sapiens GN=MYL12B PE=1 SV=2	sp|O14950 (+1)	20 kDa	3	2	3	3	3	2	3	3	4	3	4	4	18	14	11	10	18	10	14	14	12	13	11	11	0.581498	0.581133	-1.11172	NS	0.61726	1.10534	NS	0.303308	1.22545	NS
154	Enoyl-CoA delta isomerase 1, mitochondrial OS=Homo sapiens GN=ECI1 PE=1 SV=1	sp|P42126	33 kDa	4	6	6	3	4	4	5	4	6	5	4	3	12	12	15	9	15	9	13	10	14	13	11	7	0.939922	0.825005	-1.04652	NS	0.842243	1.0422	NS	0.725415	1.07603	NS
155	Phosphoglycerate mutase 1 OS=Homo sapiens GN=PGAM1 PE=1 SV=2	sp|P18669	29 kDa	5	6	5	5	6	5	4	5	6	5	4	3	8	8	7	14	12	7	6	11	16	13	8	6	0.686545	0.899356	-1.03011	NS	0.545824	-1.17829	NS	0.480942	-1.17234	NS
156	Protein-glutamine gamma-glutamyltransferase 2 OS=Homo sapiens GN=TGM2 PE=1 SV=2	sp|P21980	77 kDa	4	3	8	5	4	4	6	3	5	2	5	2	12	8	19	9	13	6	13	9	14	6	13	3	0.535261	0.731287	1.07587	NS	0.25839	1.28179	NS	0.472415	1.17824	NS
157	Staphylococcal nuclease domain-containing protein 1 OS=Homo sapiens GN=SND1 PE=1 SV=1	sp|Q7KZF4	102 kDa	5	3	5	5	6	5	4	2	9	12	3	3	8	3	10	8	12	11	9	6	15	17	6	5	0.273562	0.17503	-1.39939	NS	0.368894	-1.42286	NS	0.656009	-1.10422	NS
158	Fructose-bisphosphate aldolase A OS=Homo sapiens GN=ALDOA PE=1 SV=2	sp|P04075	39 kDa	3	2	3	3	7	1	5	2	5	5	4	1	11	5	11	10	18	4	13	10	12	12	11	5	0.505156	0.226475	-1.30761	NS	0.634431	-1.11462	NS	0.656434	1.13275	NS
159	Isopentenyl-diphosphate Delta-isomerase 1 OS=Homo sapiens GN=IDI1 PE=1 SV=2	sp|Q13907	26 kDa	4	3	2	4	3	3	2	3	4	3	3	2	14	12	8	15	17	9	13	10	12	11	12	10	0.856964	0.795974	-1.05373	NS	0.783714	1.05835	NS	0.578344	1.1216	NS
160	Pyruvate carboxylase, mitochondrial OS=Homo sapiens GN=PC PE=1 SV=2	sp|P11498	130 kDa	4	4	8	7	7	7	7	7	4	5	5	6	11	8	13	11	10	14	14	11	8	8	11	9	0.297352	0.327243	-1.22734	NS	0.547531	1.14544	NS	0.111357	1.41543	NS
161	C-1-tetrahydrofolate synthase, cytoplasmic OS=Homo sapiens GN=MTHFD1 PE=1 SV=3	sp|P11586	102 kDa	10	3	8	4	8	2	7	2	7	8	6	3	19	6	13	6	18	3	10	3	15	15	10	7	0.483852	0.357401	1.23352	NS	0.686372	-1.09114	NS	0.244192	-1.48685	NS
162	Thioredoxin OS=Homo sapiens GN=TXN PE=1 SV=3	sp|P10599	12 kDa	3	4	3	4	4	3	3	5	2	4	3	4	9	13	14	20	9	11	11	13	7	12	11	11	0.384488	0.412867	1.17916	NS	0.185593	1.31112	NS	0.622544	1.11278	NS
163	3-hydroxyisobutyrate dehydrogenase, mitochondrial OS=Homo sapiens GN=HIBADH PE=1 SV=2	sp|P31937	35 kDa	5	5	6	5	8	5	4	4	5	4	6	4	12	10	15	14	18	8	8	9	14	10	15	9	0.865845	0.588149	1.11872	NS	0.914973	1.02173	NS	0.687014	-1.08828	NS
164	Hydroxymethylglutaryl-CoA lyase, mitochondrial OS=Homo sapiens GN=HMGCL PE=1 SV=2	sp|P35914	34 kDa	5	4	7	7	5	5	4	5	5	6	5	5	15	11	13	15	15	13	7	9	14	18	14	12	0.4654	0.438	1.17053	NS	0.597975	-1.10493	NS	0.210825	-1.28297	NS
165	Elongation factor Tu, mitochondrial OS=Homo sapiens GN=TUFM PE=1 SV=2	sp|P49411	50 kDa	7	7	6	5	6	8	4	5	5	6	5	6	16	11	8	8	20	11	7	9	15	14	8	11	0.732865	0.58329	-1.12288	NS	0.555593	-1.13176	NS	0.981745	-1.00471	NS
166	Delta-1-pyrroline-5-carboxylate dehydrogenase, mitochondrial OS=Homo sapiens GN=ALDH4A1 PE=1 SV=3	sp|P30038	62 kDa	3	3	2	4	6	5	2	3	3	5	1	2	8	10	8	11	10	11	5	9	7	11	7	10	0.991677	0.973614	1.00784	NS	0.908564	1.02748	NS	0.915377	1.02574	NS
167	Fatty aldehyde dehydrogenase OS=Homo sapiens GN=ALDH3A2 PE=1 SV=1	sp|P51648	55 kDa	2	6	5	5	3	4	6	5	4	5	5	6	6	12	17	14	7	14	12	12	13	16	14	12	0.644696	0.99873	-1.00033	NS	0.437646	-1.16473	NS	0.414453	-1.17793	NS
168	3-ketoacyl-CoA thiolase, peroxisomal OS=Homo sapiens GN=ACAA1 PE=1 SV=2	sp|P09110	44 kDa	7	3	4	6	7	3	4	2	10	8	6	5	15	7	7	8	15	5	6	3	18	16	10	11	0.0531604	0.387287	1.23873	NS	0.0510415	-1.51165	NS	0.0263982	-1.86257	NS
169	4-aminobutyrate aminotransferase, mitochondrial OS=Homo sapiens GN=ABAT PE=1 SV=3	sp|P80404	56 kDa	4	5	7	5	3	5	3	4	4	6	6	4	13	11	15	9	10	9	8	8	14	15	13	14	0.118745	0.250678	1.28979	NS	0.348306	-1.20245	NS	0.0386212	-1.55423	NS
170	40S ribosomal protein S15a OS=Homo sapiens GN=RPS15A PE=1 SV=2	sp|P62244	15 kDa	2	3	2	3	2	3	2	3	3	3	3	3	9	5	9	9	7	7	5	7	7	8	9	9	0.72049	0.584595	1.15525	NS	0.769516	-1.07547	NS	0.427014	-1.23086	NS
171	60S ribosomal protein L27a OS=Homo sapiens GN=RPL27A PE=1 SV=2	sp|P46776	17 kDa	2	2	2	3	3	2	2	2	3	2	3	3	7	4	6	6	12	4	6	6	9	6	8	4	0.634506	0.371427	-1.28571	NS	0.497625	-1.21201	NS	0.823514	1.06203	NS
172	60S acidic ribosomal protein P0 OS=Homo sapiens GN=RPLP0 PE=1 SV=1	sp|P05388	34 kDa	4	5	6	5	5	4	6	4	5	3	5	4	8	11	13	14	12	10	15	7	13	7	14	9	0.969434	0.875136	-1.03377	NS	0.907541	1.02496	NS	0.777425	1.06253	NS
173	40S ribosomal protein S25 OS=Homo sapiens GN=RPS25 PE=1 SV=1	sp|P62851	14 kDa	3	3	3	2	3	3	3	2	3	3	3	3	16	9	9	6	12	7	6	4	11	12	11	8	0.34263	0.233895	1.33528	NS	0.758913	-1.07021	NS	0.152712	-1.40868	NS
174	Periplakin OS=Homo sapiens GN=PPL PE=1 SV=4	sp|O60437	205 kDa	5	7	6	12	6	11	3	8	1	5	4	8	7	10	8	17	6	18	4	14	1	5	5	13	0.301563	0.804684	-1.05553	NS	0.0504506	1.66021	NS	0.111235	1.84056	NS
175	Methylmalonate-semialdehyde dehydrogenase [acylating], mitochondrial OS=Homo sapiens GN=ALDH6A1 PE=1 SV=2	sp|Q02252	58 kDa	3	4	4	3	3	3	4	3	3	4	5	3	12	14	12	11	13	11	8	13	15	12	14	10	0.886475	0.875255	1.033	NS	0.739723	-1.06878	NS	0.630854	-1.10323	NS
176	Lactoylglutathione lyase OS=Homo sapiens GN=GLO1 PE=1 SV=4	sp|Q04760	21 kDa	2	4	3	5	2	3	2	4	3	2	3	3	7	7	9	13	10	11	6	10	12	5	9	4	0.616639	0.705125	-1.09279	NS	0.590013	1.17028	NS	0.371331	1.2779	NS
177	6-phosphogluconate dehydrogenase, decarboxylating OS=Homo sapiens GN=PGD PE=1 SV=3	sp|P52209	53 kDa	7	4	4	5	5	4	4	2	6	5	5	4	14	9	9	14	12	6	9	4	14	9	11	10	0.276669	0.162063	1.40807	NS	0.955942	1.01173	NS	0.165422	-1.38139	NS
178	ADP-ribosylation factor 3 OS=Homo sapiens GN=ARF3 PE=1 SV=2	sp|P61204 (+1)	21 kDa	3	2	2	3	4	3	2	4	4	3	3	2	25	11	24	18	30	25	13	16	33	23	22	9	0.76186	0.520333	-1.13112	NS	0.478474	-1.14144	NS	0.935051	-1.01255	NS
179	40S ribosomal protein S5 OS=Homo sapiens GN=RPS5 PE=1 SV=4	sp|P46782	23 kDa	2	2	3	2	3	3	3	2	3	4	2	2	10	9	12	11	16	12	11	9	16	17	13	10	0.285643	0.360833	-1.21312	NS	0.122025	-1.36923	NS	0.521198	-1.13438	NS
180	Cullin-associated NEDD8-dissociated protein 1 OS=Homo sapiens GN=CAND1 PE=1 SV=2	sp|Q86VP6	136 kDa	5	5	2	7	5	7	5	4	2	7	4	2	10	10	6	12	9	11	8	10	5	10	10	4	0.441318	0.82493	-1.05215	NS	0.398665	1.28568	NS	0.208378	1.3618	NS
181	60S ribosomal protein L18a OS=Homo sapiens GN=RPL18A PE=1 SV=2	sp|Q02543	21 kDa	3	3	3	3	3	3	3	3	3	3	3	3	12	11	14	11	14	12	14	11	16	12	12	10	0.826207	0.524611	-1.13675	NS	0.72822	-1.07281	NS	0.802233	1.05114	NS
182	Talin-1 OS=Homo sapiens GN=TLN1 PE=1 SV=3	sp|Q9Y490	270 kDa	6	10	6	4	3	14	4	3	2	0	5	2	6	16	8	4	4	23	4	5	2	0	9	4	0.236794	0.735375	-1.0843	NS	0.0894108	2.39491	NS	0.101328	2.34367	NS
183	40S ribosomal protein S24 OS=Homo sapiens GN=RPS24 PE=1 SV=1	sp|P62847	15 kDa	2	2	2	2	2	2	2	2	2	2	2	2	16	13	14	9	21	10	12	11	13	17	14	10	0.868216	0.65301	-1.09146	NS	0.761266	-1.06086	NS	0.884992	1.02824	NS
184	GTP:AMP phosphotransferase, mitochondrial OS=Homo sapiens GN=AK3 PE=1 SV=4	sp|Q9UIJ7	26 kDa	4	3	4	3	4	3	3	3	4	4	4	3	9	10	9	9	15	10	5	7	15	8	10	9	0.774944	0.867354	-1.03967	NS	0.491094	-1.16792	NS	0.629651	-1.11481	NS
185	Macrophage migration inhibitory factor OS=Homo sapiens GN=MIF PE=1 SV=4	sp|P14174	12 kDa	2	2	2	2	2	2	2	2	2	2	2	2	15	13	18	16	14	13	19	16	11	12	17	14	0.661663	0.664697	-1.08114	NS	0.60402	1.10136	NS	0.341055	1.19371	NS
186	Nicotinamide phosphoribosyltransferase OS=Homo sapiens GN=NAMPT PE=1 SV=1	sp|P43490	56 kDa	7	7	5	4	4	3	4	4	4	5	5	3	12	13	19	10	9	7	5	9	10	12	10	8	0.0625568	0.0478177	1.68375	NS	0.192994	1.31053	NS	0.27877	-1.29751	NS
187	Very long-chain specific acyl-CoA dehydrogenase, mitochondrial OS=Homo sapiens GN=ACADVL PE=1 SV=1	sp|P49748	70 kDa	7	4	5	4	7	4	3	5	8	6	3	5	9	9	8	7	14	10	6	9	18	12	5	9	0.368419	0.376623	-1.23254	NS	0.197272	-1.3509	NS	0.623347	-1.11401	NS
188	Argininosuccinate synthase OS=Homo sapiens GN=ASS1 PE=1 SV=2	sp|P00966	47 kDa	4	4	2	4	4	5	4	3	6	9	4	2	13	8	8	11	12	10	9	5	12	16	9	5	0.856139	0.800232	1.05995	NS	0.772904	-1.06589	NS	0.58549	-1.13176	NS
189	Aspartate aminotransferase, mitochondrial OS=Homo sapiens GN=GOT2 PE=1 SV=3	sp|P00505	48 kDa	5	5	4	4	6	5	4	3	6	4	3	4	12	11	11	9	24	9	12	10	16	13	9	10	0.316126	0.169369	-1.34206	NS	0.533965	-1.13953	NS	0.431934	1.16779	NS
190	Heterogeneous nuclear ribonucleoprotein K OS=Homo sapiens GN=HNRNPK PE=1 SV=1	sp|P61978	51 kDa	5	6	4	5	5	4	4	5	5	3	4	4	11	13	11	10	15	12	8	13	13	8	15	10	0.827704	0.583883	-1.12055	NS	0.792288	-1.05682	NS	0.734299	1.07257	NS
191	Adenylate kinase isoenzyme 1 OS=Homo sapiens GN=AK1 PE=1 SV=3	sp|P00568	22 kDa	5	4	5	4	5	4	5	4	2	4	5	3	13	8	12	9	14	8	10	8	5	8	10	5	0.205407	0.962239	-1.01054	NS	0.126918	1.45005	NS	0.116106	1.48001	NS
192	ATP synthase subunit beta, mitochondrial OS=Homo sapiens GN=ATP5B PE=1 SV=3	sp|P06576	57 kDa	4	6	6	5	4	5	6	5	4	4	6	2	7	11	14	12	9	12	14	11	11	7	11	3	0.21265	0.547886	-1.13536	NS	0.277334	1.33998	NS	0.113017	1.4959	NS
193	40S ribosomal protein S14 OS=Homo sapiens GN=RPS14 PE=1 SV=3	sp|P62263	16 kDa	3	2	3	2	3	3	2	3	2	3	3	2	14	12	9	8	15	8	8	11	12	16	10	11	0.715053	0.929832	-1.01933	NS	0.483089	-1.15782	NS	0.535619	-1.139	NS
194	Filamin-B OS=Homo sapiens GN=FLNB PE=1 SV=2	sp|O75369	278 kDa	5	10	8	6	0	6	2	8	2	0	9	5	8	15	10	6	0	7	2	10	2	0	12	6	0.187796	0.092735	2.32316	NS	0.0871634	2.35819	NS	0.962379	1.02668	NS
195	40S ribosomal protein SA OS=Homo sapiens GN=RPSA PE=1 SV=4	sp|P08865	33 kDa	3	4	4	4	4	2	3	5	4	5	2	3	13	6	9	7	18	5	8	12	13	10	9	7	0.498788	0.259447	-1.29233	NS	0.569664	-1.14156	NS	0.599404	1.12314	NS
196	Glutathione reductase, mitochondrial OS=Homo sapiens GN=GSR PE=1 SV=2	sp|P00390	56 kDa	4	2	2	4	4	2	3	3	3	3	4	3	9	3	6	7	7	3	7	3	5	4	8	3	0.790598	0.600688	1.16996	NS	0.544231	1.19913	NS	0.8965	1.04202	NS
197	60S ribosomal protein L30 OS=Homo sapiens GN=RPL30 PE=1 SV=2	sp|P62888	13 kDa	3	3	3	3	3	3	4	3	2	2	3	2	11	9	12	11	10	11	12	12	9	14	14	9	0.850935	0.584211	-1.12402	NS	0.635396	-1.10588	NS	0.936653	1.01681	NS
198	Alpha-aminoadipic semialdehyde synthase, mitochondrial OS=Homo sapiens GN=AASS PE=1 SV=1	sp|Q9UDR5	102 kDa	5	2	6	3	3	4	3	1	5	4	4	1	8	4	8	5	8	10	3	4	9	8	8	3	0.86734	0.882806	-1.04266	NS	0.61158	-1.14997	NS	0.754725	-1.08975	NS
199	Thioredoxin reductase 1, cytoplasmic OS=Homo sapiens GN=TXNRD1 PE=1 SV=3	sp|Q16881	71 kDa	5	4	3	3	5	3	3	6	4	4	4	4	7	10	5	5	10	10	5	12	5	6	7	9	0.248367	0.161718	-1.4261	NS	0.922797	-1.02745	NS	0.176205	1.40531	NS
200	Hydroxyacyl-coenzyme A dehydrogenase, mitochondrial OS=Homo sapiens GN=HADH PE=1 SV=3	sp|Q16836	34 kDa	3	4	4	3	3	3	2	3	4	3	4	3	5	5	6	6	8	7	5	5	9	4	9	7	0.545243	0.530229	-1.20153	NS	0.25641	-1.37644	NS	0.658688	-1.12803	NS
201	40S ribosomal protein S4, X isoform OS=Homo sapiens GN=RPS4X PE=1 SV=2	sp|P62701	30 kDa	5	3	6	4	5	5	4	3	5	4	4	3	12	4	8	6	13	9	8	7	10	9	7	4	0.477237	0.291754	-1.29528	NS	0.93287	-1.02201	NS	0.336874	1.26537	NS
202	60S ribosomal protein L23 OS=Homo sapiens GN=RPL23 PE=1 SV=1	sp|P62829	15 kDa	2	2	2	2	2	3	2	3	2	1	3	2	5	7	5	5	7	7	5	5	6	2	12	7	0.707508	0.646322	-1.14524	NS	0.656353	-1.19098	NS	0.883659	-1.05006	NS
203	40S ribosomal protein S12 OS=Homo sapiens GN=RPS12 PE=1 SV=3	sp|P25398	15 kDa	2	3	2	4	4	4	3	3	3	4	4	5	6	7	8	7	10	7	5	7	6	8	8	8	0.908472	0.732798	-1.09485	NS	0.690674	-1.11031	NS	0.980197	-1.00649	NS
204	14-3-3 protein gamma OS=Homo sapiens GN=YWHAG PE=1 SV=2	sp|P61981	28 kDa	4	3	3	6	3	7	2	4	6	6	3	3	13	11	15	19	13	14	9	23	17	15	11	13	0.889547	0.644105	-1.08934	NS	0.994455	1.0013	NS	0.695582	1.07739	NS
205	60S ribosomal protein L18 OS=Homo sapiens GN=RPL18 PE=1 SV=2	sp|Q07020	22 kDa	4	3	3	3	4	4	3	3	3	4	3	3	18	8	13	10	10	12	8	8	14	13	13	9	0.539437	0.354027	1.22527	NS	0.890479	-1.02824	NS	0.300037	-1.2502	NS
206	60S ribosomal protein L11 OS=Homo sapiens GN=RPL11 PE=1 SV=2	sp|P62913	20 kDa	2	3	3	3	2	2	2	2	2	3	2	2	14	10	6	8	10	10	6	7	9	9	9	6	0.896503	0.646094	1.11554	NS	0.602313	1.13198	NS	0.906286	1.02942	NS
207	40S ribosomal protein S2 OS=Homo sapiens GN=RPS2 PE=1 SV=2	sp|P15880	31 kDa	3	2	2	3	3	3	1	2	3	3	3	3	7	5	5	5	11	8	4	5	7	6	7	4	0.559201	0.333399	-1.3165	NS	0.701803	-1.1197	NS	0.521339	1.19504	NS
208	Actin-related protein 2/3 complex subunit 4 OS=Homo sapiens GN=ARPC4 PE=1 SV=3	sp|P59998	20 kDa	3	2	3	3	2	3	3	2	2	3	3	3	9	6	7	7	8	7	5	5	7	7	5	5	0.851894	0.715203	1.1048	NS	0.550377	1.17895	NS	0.816718	1.0685	NS
209	Epoxide hydrolase 1 OS=Homo sapiens GN=EPHX1 PE=1 SV=1	sp|P07099	53 kDa	2	1	3	1	3	1	2	3	3	3	1	2	5	1	4	1	4	1	3	5	5	6	1	3	0.679413	0.558505	-1.27082	NS	0.484094	-1.38819	NS	0.788909	-1.12125	NS
210	Fructose-bisphosphate aldolase B OS=Homo sapiens GN=ALDOB PE=1 SV=2	sp|P05062	39 kDa	5	4	6	4	4	2	2	2	6	6	5	3	13	12	17	14	5	2	5	2	20	15	17	9	1.09143e-05	0.00132351	3.72068	0.00264702	0.529639	-1.12342	NS	0.000578953	-4.22408	0.00173686	+
211	Annexin A6 OS=Homo sapiens GN=ANXA6 PE=1 SV=3	sp|P08133	76 kDa	2	9	8	5	6	7	6	6	4	4	7	4	2	12	13	7	7	9	11	11	6	5	11	6	0.490872	0.396365	-1.2219	NS	0.617763	1.15763	NS	0.160129	1.41597	NS
212	Thioredoxin domain-containing protein 17 OS=Homo sapiens GN=TXNDC17 PE=1 SV=1	sp|Q9BRA2	14 kDa	3	2	3	3	2	2	2	2	2	2	3	2	8	7	7	6	6	6	8	4	4	6	7	5	0.76606	0.744273	1.09509	NS	0.45788	1.23493	NS	0.660617	1.13836	NS
213	Proteasome activator complex subunit 1 OS=Homo sapiens GN=PSME1 PE=1 SV=1	sp|Q06323	29 kDa	6	2	2	3	3	3	2	2	4	4	2	3	14	6	5	7	11	6	4	5	15	11	5	6	0.54861	0.488858	1.20033	NS	0.524262	-1.16608	NS	0.180779	-1.40503	NS
214	Trifunctional enzyme subunit beta, mitochondrial OS=Homo sapiens GN=HADHB PE=1 SV=3	sp|P55084	51 kDa	4	4	2	2	3	3	3	3	3	5	2	4	6	7	7	6	5	7	7	7	10	10	6	8	0.469344	0.803826	-1.07147	NS	0.262344	-1.33767	NS	0.356507	-1.27039	NS
215	Valyl-tRNA synthetase OS=Homo sapiens GN=VARS PE=1 SV=4	sp|P26640	140 kDa	1	1	10	5	3	8	6	4	1	3	4	3	1	1	22	7	5	10	13	6	2	3	8	4	0.367527	0.234803	-1.71307	NS	0.294694	1.66535	NS	0.0184251	2.11587	NS
216	Enoyl-CoA hydratase domain-containing protein 3, mitochondrial OS=Homo sapiens GN=ECHDC3 PE=1 SV=2	sp|Q96DC8	33 kDa	6	3	5	3	5	5	3	4	6	5	5	2	11	5	8	6	12	9	5	9	15	10	7	4	0.604258	0.425359	-1.2194	NS	0.421539	-1.21949	NS	0.9637	-1.01087	NS
217	1,2-dihydroxy-3-keto-5-methylthiopentene dioxygenase OS=Homo sapiens GN=ADI1 PE=1 SV=1	sp|Q9BV57	21 kDa	2	2	3	3	5	3	1	3	3	4	2	3	5	4	10	4	9	7	1	5	8	7	3	5	0.99354	0.928066	1.03899	NS	0.915127	-1.03499	NS	0.907615	-1.03522	NS
218	Proteasome activator complex subunit 2 OS=Homo sapiens GN=PSME2 PE=1 SV=4	sp|Q9UL46	27 kDa	4	4	4	2	3	4	3	4	3	5	4	4	12	6	5	4	10	8	5	5	7	11	6	5	0.907419	0.814683	-1.06537	NS	0.766335	-1.08277	NS	0.973884	-1.00872	NS
219	Chloride intracellular channel protein 1 OS=Homo sapiens GN=CLIC1 PE=1 SV=4	sp|O00299	27 kDa	5	4	3	4	6	4	4	2	5	3	3	4	11	8	5	8	15	8	9	7	9	8	7	10	0.539879	0.317907	-1.26872	NS	0.726823	-1.08992	NS	0.49296	1.17438	NS
220	Sorcin OS=Homo sapiens GN=SRI PE=1 SV=1	sp|P30626	22 kDa	4	1	4	3	4	3	5	4	4	4	3	4	8	2	7	5	8	6	9	9	8	5	4	10	0.28133	0.0996269	-1.57225	NS	0.387961	-1.28074	NS	0.455697	1.21487	NS
221	Mitochondrial fission 1 protein OS=Homo sapiens GN=FIS1 PE=1 SV=2	sp|Q9Y3D6	17 kDa	3	3	3	3	3	3	3	3	3	3	3	2	10	9	11	10	9	9	9	8	8	6	12	5	0.642202	0.768573	1.07057	NS	0.363825	1.242	NS	0.516463	1.17343	NS
222	40S ribosomal protein S7 OS=Homo sapiens GN=RPS7 PE=1 SV=1	sp|P62081	22 kDa	2	2	2	2	1	2	2	1	2	3	1	2	7	6	7	8	7	8	6	6	13	9	6	8	0.456868	0.931621	-1.02346	NS	0.269282	-1.31978	NS	0.295307	-1.30377	NS
223	Fumarate hydratase, mitochondrial OS=Homo sapiens GN=FH PE=1 SV=3	sp|P07954	55 kDa	2	3	3	3	5	4	3	3	2	3	2	2	7	8	8	6	9	10	7	6	8	7	8	6	0.802422	0.5545	-1.16382	NS	0.914255	-1.02871	NS	0.612799	1.13851	NS
224	Glucosidase 2 subunit beta OS=Homo sapiens GN=PRKCSH PE=1 SV=2	sp|P14314	59 kDa	5	2	3	4	6	2	6	1	4	3	4	2	12	5	4	8	16	2	12	2	10	5	5	3	0.864851	0.944025	1.03171	NS	0.443743	1.23782	NS	0.342755	1.42578	NS
225	Destrin OS=Homo sapiens GN=DSTN PE=1 SV=3	sp|P60981	19 kDa	2	2	2	3	3	4	2	1	2	2	2	2	7	8	6	7	10	9	8	4	7	9	7	7	0.817033	0.564288	-1.16238	NS	0.724099	-1.09727	NS	0.800617	1.06684	NS
226	Proteasome subunit beta type-1 OS=Homo sapiens GN=PSMB1 PE=1 SV=2	sp|P20618	26 kDa	2	3	6	2	2	1	1	2	2	1	3	2	6	5	10	5	11	3	4	4	5	4	8	2	0.645321	0.716065	1.11122	NS	0.365272	1.31259	NS	0.599466	1.18914	NS
227	Superoxide dismutase [Cu-Zn] OS=Homo sapiens GN=SOD1 PE=1 SV=2	sp|P00441	16 kDa	3	1	2	2	2	1	2	1	2	3	2	1	9	3	5	4	7	6	7	4	10	9	5	4	0.534281	0.529969	-1.2066	NS	0.294537	-1.35156	NS	0.649058	-1.13483	NS
228	Protein canopy homolog 2 OS=Homo sapiens GN=CNPY2 PE=1 SV=1	sp|Q9Y2B0	21 kDa	3	2	2	3	4	3	3	2	2	4	3	3	9	5	6	5	11	4	4	3	4	8	7	7	0.892474	0.752417	1.09671	NS	0.805956	-1.0713	NS	0.620968	-1.19548	NS
229	60S acidic ribosomal protein P1 OS=Homo sapiens GN=RPLP1 PE=1 SV=1	sp|P05386	12 kDa	1	1	1	1	1	1	1	1	1	1	1	1	11	7	10	8	13	8	8	8	11	9	7	6	0.830917	0.724011	-1.08635	NS	0.797636	1.06378	NS	0.564892	1.1477	NS
230	Low molecular weight phosphotyrosine protein phosphatase OS=Homo sapiens GN=ACP1 PE=1 SV=3	sp|P24666	18 kDa	4	2	2	2	3	2	3	2	4	3	4	3	15	8	8	6	12	6	5	5	7	10	11	7	0.645902	0.322382	1.28047	NS	0.927049	1.02393	NS	0.445204	-1.21314	NS
231	Epididymal secretory protein E1 OS=Homo sapiens GN=NPC2 PE=1 SV=1	sp|P61916	17 kDa	1	1	1	1	1	1	1	2	2	3	2	1	4	3	3	1	5	3	5	4	8	5	6	4	0.0939005	0.194222	-1.64376	NS	0.0340093	-2.13563	NS	0.390721	-1.31418	NS
232	Programmed cell death 6-interacting protein OS=Homo sapiens GN=PDCD6IP PE=1 SV=1	sp|Q8WUM4	96 kDa	5	3	5	1	6	2	4	3	6	6	5	1	12	4	8	1	13	3	6	3	11	8	10	1	0.853395	0.891367	-1.03948	NS	0.466452	-1.21769	NS	0.56414	-1.1688	NS
233	Neutral alpha-glucosidase AB OS=Homo sapiens GN=GANAB PE=1 SV=3	sp|Q14697	107 kDa	7	1	5	4	7	1	4	0	7	5	4	4	9	1	5	6	10	1	6	0	8	8	7	4	0.335135	0.553768	1.31643	NS	0.347427	-1.33951	NS	0.162719	-1.9974	NS
234	Serine hydroxymethyltransferase, mitochondrial OS=Homo sapiens GN=SHMT2 PE=1 SV=3	sp|P34897	56 kDa	4	4	6	3	3	3	3	4	3	2	3	2	11	10	9	9	5	5	6	7	7	4	5	2	0.0216668	0.0736927	1.59715	NS	0.0143755	2.12035	0.0431264	0.37859	1.31799	NS	+
235	60S ribosomal protein L23a OS=Homo sapiens GN=RPL23A PE=1 SV=1	sp|P62750	18 kDa	1	1	1	1	2	1	2	1	1	1	1	1	9	8	4	7	10	10	7	7	11	9	5	4	0.577059	0.36215	-1.26155	NS	0.872592	-1.04344	NS	0.469685	1.20024	NS
236	60S ribosomal protein L14 OS=Homo sapiens GN=RPL14 PE=1 SV=4	sp|P50914	23 kDa	2	2	2	2	3	2	2	3	2	2	3	3	5	9	5	4	7	4	8	9	6	5	7	6	0.635244	0.452524	-1.29384	NS	0.820131	-1.06866	NS	0.500346	1.20594	NS
237	Poly(rC)-binding protein 1 OS=Homo sapiens GN=PCBP1 PE=1 SV=2	sp|Q15365	37 kDa	4	3	3	2	5	3	3	1	4	2	2	3	5	4	4	4	8	5	6	3	5	5	6	5	0.586479	0.335103	-1.36403	NS	0.453972	-1.27609	NS	0.796424	1.08191	NS
238	60S acidic ribosomal protein P2 OS=Homo sapiens GN=RPLP2 PE=1 SV=1	sp|P05387	12 kDa	3	5	4	3	2	2	3	2	4	4	3	4	9	10	9	5	8	6	8	5	7	14	7	7	0.667835	0.580579	1.15419	NS	0.768866	-1.07397	NS	0.378037	-1.25306	NS
239	Eukaryotic translation initiation factor 5A-1 OS=Homo sapiens GN=EIF5A PE=1 SV=2	sp|P63241	17 kDa	3	2	2	2	2	3	3	1	2	4	2	2	6	3	4	3	4	7	4	1	3	8	5	5	0.619379	0.906836	-1.04233	NS	0.373143	-1.34322	NS	0.482598	-1.26128	NS
240	60S ribosomal protein L13 OS=Homo sapiens GN=RPL13 PE=1 SV=4	sp|P26373	24 kDa	3	1	1	3	3	0	1	1	2	2	1	0	3	1	2	3	6	0	1	2	5	3	1	0	0.998579	0.934398	-1.03964	NS	0.983473	-1.00982	NS	0.99418	-1.00346	NS
241	Acyl-coenzyme A thioesterase 13 OS=Homo sapiens GN=ACOT13 PE=1 SV=1	sp|Q9NPJ3	15 kDa	2	3	2	2	3	2	3	3	2	3	3	3	9	10	7	9	10	9	9	10	9	11	10	8	0.807301	0.555693	-1.14824	NS	0.649674	-1.11235	NS	0.888335	1.03275	NS
242	Alpha-aminoadipic semialdehyde dehydrogenase OS=Homo sapiens GN=ALDH7A1 PE=1 SV=5	sp|P49419	58 kDa	3	5	4	3	5	5	3	4	4	3	4	3	5	10	9	6	9	6	4	7	7	4	7	4	0.602432	0.741091	1.09266	NS	0.315052	1.32408	NS	0.508742	1.21064	NS
243	Proteasome subunit alpha type-7 OS=Homo sapiens GN=PSMA7 PE=1 SV=1	sp|O14818	28 kDa	5	2	3	2	4	4	3	3	3	4	3	3	13	5	6	10	15	13	4	8	11	9	5	10	0.656986	0.415072	-1.20933	NS	0.815688	-1.05778	NS	0.523038	1.15917	NS
244	Glyoxylate reductase/hydroxypyruvate reductase OS=Homo sapiens GN=GRHPR PE=1 SV=1	sp|Q9UBQ7	36 kDa	3	2	4	2	4	3	3	1	3	2	6	1	7	3	11	3	8	5	6	1	7	7	10	1	0.867681	0.717433	1.11592	NS	0.788919	-1.07958	NS	0.543136	-1.19966	NS
245	Ubiquitin-conjugating enzyme E2 variant 1 OS=Homo sapiens GN=UBE2V1 PE=1 SV=2	sp|Q13404	16 kDa	2	2	1	2	2	1	2	2	2	2	2	2	8	3	3	6	7	3	4	5	5	2	4	3	0.559027	0.985276	1.00594	NS	0.349959	1.38205	NS	0.349771	1.38751	NS
246	Activated RNA polymerase II transcriptional coactivator p15 OS=Homo sapiens GN=SUB1 PE=1 SV=3	sp|P53999	14 kDa	2	2	1	2	2	1	2	2	2	2	2	1	7	5	4	8	6	4	4	7	4	5	7	6	0.969946	0.792513	1.08185	NS	0.871417	1.04897	NS	0.960326	-1.0153	NS
247	14-3-3 protein beta/alpha OS=Homo sapiens GN=YWHAB PE=1 SV=3	sp|P31946	28 kDa	5	4	2	6	4	5	0	6	5	6	3	2	15	7	8	18	14	10	2	15	11	14	7	5	0.781331	0.586187	1.12276	NS	0.47945	1.2476	NS	0.818729	1.07851	NS
248	Mesencephalic astrocyte-derived neurotrophic factor OS=Homo sapiens GN=MANF PE=1 SV=3	sp|P55145	21 kDa	2	4	3	4	2	3	4	4	3	4	5	2	7	8	7	5	7	7	6	4	4	8	10	4	0.977524	0.813338	1.06859	NS	0.96765	1.01122	NS	0.896625	-1.03747	NS
249	Ferritin heavy chain OS=Homo sapiens GN=FTH1 PE=1 SV=2	sp|P02794	21 kDa	4	1	4	2	3	1	2	2	7	5	2	3	8	1	6	2	9	1	2	2	14	8	3	4	0.252652	0.666609	1.16824	NS	0.157381	-1.72521	NS	0.03952	-2.06798	NS
250	Proteasome subunit beta type-2 OS=Homo sapiens GN=PSMB2 PE=1 SV=1	sp|P49721	23 kDa	1	2	3	4	2	3	2	1	2	3	2	2	3	6	8	5	3	4	7	1	5	4	7	3	0.626644	0.382889	1.33728	NS	0.733294	1.11261	NS	0.589626	-1.20425	NS
251	Wiskott-Aldrich syndrome protein family member 1 OS=Homo sapiens GN=WASF1 PE=1 SV=1	sp|Q92558	62 kDa	1	1	1	1	1	1	1	1	1	1	1	1	8	5	4	4	10	8	8	6	6	5	5	8	0.203487	0.0928329	-1.59577	NS	0.587307	-1.17601	NS	0.240686	1.37059	NS
252	Hydroxyacid oxidase 1 OS=Homo sapiens GN=HAO1 PE=1 SV=1	sp|Q9UJM8	41 kDa	5	4	4	4	4	3	4	2	6	5	5	3	9	9	5	6	8	3	5	2	11	6	6	3	0.346849	0.143632	1.55476	NS	0.715131	1.10362	NS	0.255568	-1.4134	NS
253	Ras GTPase-activating-like protein IQGAP2 OS=Homo sapiens GN=IQGAP2 PE=1 SV=4	sp|Q13576	181 kDa	1	4	8	8	1	7	8	4	3	1	8	4	1	4	13	9	1	8	13	4	3	1	13	4	0.884727	0.72779	-1.1006	NS	0.563973	1.18233	NS	0.448298	1.34698	NS
254	Microsomal triglyceride transfer protein large subunit OS=Homo sapiens GN=MTTP PE=1 SV=1	sp|P55157	99 kDa	5	0	4	3	3	1	1	0	6	8	5	2	8	0	7	5	4	1	2	0	9	10	8	2	0.0324805	0.0556509	2.67091	NS	0.346823	-1.6069	NS	0.0050817	-4.01488	0.0152451	+
255	60S ribosomal protein L24 OS=Homo sapiens GN=RPL24 PE=1 SV=1	sp|P83731	18 kDa	2	2	1	2	2	2	2	2	1	2	2	1	11	3	6	7	9	4	5	5	8	3	6	3	0.660593	0.695431	1.11758	NS	0.365203	1.30471	NS	0.594866	1.17641	NS
256	4-hydroxyphenylpyruvate dioxygenase OS=Homo sapiens GN=HPD PE=1 SV=2	sp|P32754	45 kDa	5	3	3	2	4	1	0	0	3	4	0	2	6	3	3	2	5	1	0	0	5	4	0	2	0.239546	0.0708111	2.32818	NS	0.545504	1.2749	NS	0.227513	-1.7867	NS
257	40S ribosomal protein S26 OS=Homo sapiens GN=RPS26 PE=1 SV=3	sp|P62854	13 kDa	2	2	2	2	2	2	2	2	2	2	2	3	7	7	10	7	6	8	7	8	7	8	8	7	0.999856	0.981753	-1.00594	NS	0.993487	-1.0021	NS	0.998821	1.00038	NS
258	Alcohol dehydrogenase [NADP+] OS=Homo sapiens GN=AKR1A1 PE=1 SV=3	sp|P14550	37 kDa	5	2	6	2	6	4	5	2	3	5	6	3	8	3	11	3	10	5	8	2	5	8	7	4	0.964156	0.797389	-1.07551	NS	0.981745	1.00657	NS	0.786461	1.08053	NS
259	Aspartate aminotransferase, cytoplasmic OS=Homo sapiens GN=GOT1 PE=1 SV=3	sp|P17174	46 kDa	6	2	2	1	6	2	3	3	5	6	2	1	9	2	4	2	9	2	3	4	11	11	2	1	0.829401	0.794671	-1.09216	NS	0.436894	-1.40643	NS	0.711797	-1.19727	NS
260	Eukaryotic initiation factor 4A-I OS=Homo sapiens GN=EIF4A1 PE=1 SV=1	sp|P60842	46 kDa	1	3	3	3	2	3	3	3	4	1	5	3	2	5	7	5	4	7	6	6	7	2	7	6	0.702267	0.37392	-1.31707	NS	0.525987	-1.21953	NS	0.791448	1.08208	NS
261	Isoleucyl-tRNA synthetase, mitochondrial OS=Homo sapiens GN=IARS2 PE=1 SV=2	sp|Q9NSE4	114 kDa	3	2	0	3	4	4	3	4	2	3	3	3	6	2	0	4	8	6	5	5	4	5	4	4	0.0868337	0.0588807	-2.06312	NS	0.318747	-1.49803	NS	0.236927	1.4509	NS
262	Prostaglandin E synthase 3 OS=Homo sapiens GN=PTGES3 PE=1 SV=1	sp|Q15185	19 kDa	2	2	2	2	3	2	2	2	2	2	2	2	7	7	8	8	12	11	7	7	9	8	8	6	0.508714	0.287177	-1.29844	NS	0.805201	-1.06526	NS	0.401225	1.22636	NS
263	Methyltransferase-like protein 7A OS=Homo sapiens GN=METTL7A PE=1 SV=1	sp|Q9H8H3	28 kDa	1	1	3	2	0	3	2	3	4	2	4	2	2	2	8	7	0	7	2	4	14	10	10	4	0.0394358	0.482149	1.4154	NS	0.126546	-2.04348	NS	0.037228	-2.89124	NS
264	Proteasome subunit beta type-5 OS=Homo sapiens GN=PSMB5 PE=1 SV=3	sp|P28074	28 kDa	5	2	2	3	3	3	2	2	4	4	2	2	9	5	6	5	6	5	5	3	9	7	6	4	0.624991	0.457825	1.25293	NS	0.832805	-1.06097	NS	0.341265	-1.33073	NS
265	Ubiquitin-conjugating enzyme E2 N OS=Homo sapiens GN=UBE2N PE=1 SV=1	sp|P61088	17 kDa	2	1	2	1	1	2	1	2	1	2	2	2	5	3	5	3	3	3	4	4	2	5	5	4	0.959693	0.869424	1.0621	NS	0.919827	-1.03626	NS	0.801756	-1.0962	NS
266	60S ribosomal protein L31 OS=Homo sapiens GN=RPL31 PE=1 SV=1	sp|P62899	14 kDa	2	2	3	3	3	2	2	2	3	2	3	2	7	5	5	7	9	6	6	6	7	9	6	6	0.749322	0.542584	-1.18644	NS	0.519426	-1.19614	NS	0.972697	-1.00928	NS
267	Homogentisate 1,2-dioxygenase OS=Homo sapiens GN=HGD PE=1 SV=2	sp|Q93099	50 kDa	4	3	4	3	2	3	2	2	3	3	3	4	6	6	5	3	2	7	3	3	4	4	6	6	0.716566	0.473707	1.2764	NS	0.921344	-1.03175	NS	0.463447	-1.28321	NS
268	Calpain small subunit 1 OS=Homo sapiens GN=CAPNS1 PE=1 SV=1	sp|P04632	28 kDa	4	3	3	2	4	1	2	2	5	5	3	5	10	4	3	5	11	1	4	3	7	6	4	8	0.68031	0.700257	1.12822	NS	0.604766	-1.1633	NS	0.369483	-1.40181	NS
269	Histidine triad nucleotide-binding protein 1 OS=Homo sapiens GN=HINT1 PE=1 SV=2	sp|P49773	14 kDa	2	3	2	2	1	2	2	3	1	2	3	3	4	4	6	4	1	2	4	5	3	4	6	7	0.399196	0.400857	1.36483	NS	0.635548	-1.16648	NS	0.191835	-1.5993	NS
270	UPF0556 protein C19orf10 OS=Homo sapiens GN=C19orf10 PE=1 SV=1	sp|Q969H8	19 kDa	3	2	2	2	2	3	2	2	3	1	2	3	5	3	6	5	6	9	4	5	7	1	5	5	0.513675	0.344768	-1.33582	NS	0.989198	1.00447	NS	0.405084	1.39277	NS
271	Methylcrotonoyl-CoA carboxylase beta chain, mitochondrial OS=Homo sapiens GN=MCCC2 PE=1 SV=1	sp|Q9HCC0	61 kDa	5	2	4	3	5	1	4	3	3	5	5	4	10	4	8	5	13	2	6	6	5	9	11	6	0.805107	0.842036	-1.05586	NS	0.526168	-1.18961	NS	0.663001	-1.1797	NS
272	Protein S100-A11 OS=Homo sapiens GN=S100A11 PE=1 SV=2	sp|P31949	12 kDa	1	3	2	3	2	2	3	3	1	2	2	2	4	7	5	9	6	4	5	8	3	5	6	8	0.944739	0.959176	1.01492	NS	0.774269	1.08748	NS	0.800207	1.07842	NS
273	Peptidyl-prolyl cis-trans isomerase F, mitochondrial OS=Homo sapiens GN=PPIF PE=1 SV=1	sp|P30405	22 kDa	2	2	1	2	3	2	1	1	2	2	1	3	3	2	2	2	6	2	1	2	5	3	2	3	0.644721	0.617741	-1.25115	NS	0.366708	-1.47457	NS	0.694327	-1.17443	NS
274	Proliferation-associated protein 2G4 OS=Homo sapiens GN=PA2G4 PE=1 SV=3	sp|Q9UQ80	44 kDa	1	1	1	1	1	1	1	1	2	1	1	1	6	8	10	8	7	10	7	4	10	8	12	11	0.298818	0.789342	1.07168	NS	0.217242	-1.33658	NS	0.160938	-1.41401	NS
275	Aflatoxin B1 aldehyde reductase member 3 OS=Homo sapiens GN=AKR7A3 PE=1 SV=2	sp|O95154	37 kDa	3	1	5	2	2	2	2	1	2	3	2	2	5	4	11	5	3	4	6	4	6	5	8	6	0.463199	0.361012	1.33058	NS	0.860707	-1.05093	NS	0.269258	-1.4113	NS
276	Ras-related protein Rab-1B OS=Homo sapiens GN=RAB1B PE=1 SV=1	sp|Q9H0U4	22 kDa	3	1	2	2	1	1	3	1	2	3	3	2	4	2	6	3	3	3	6	1	5	6	4	2	0.800878	0.898976	1.04938	NS	0.667152	-1.16454	NS	0.538935	-1.25307	NS
277	Omega-amidase NIT2 OS=Homo sapiens GN=NIT2 PE=1 SV=1	sp|Q9NQR4	31 kDa	5	4	3	5	5	5	3	5	5	5	1	4	10	5	5	7	8	8	4	7	10	9	1	7	0.973495	0.885219	-1.04014	NS	0.963285	-1.01262	NS	0.963877	1.01241	NS
278	Nucleolin OS=Homo sapiens GN=NCL PE=1 SV=3	sp|P19338	77 kDa	6	0	2	1	5	1	3	0	4	3	4	1	9	0	2	1	7	1	4	0	6	4	6	1	0.533133	0.959607	-1.02094	NS	0.26998	-1.78141	NS	0.396713	-1.37368	NS
279	Keratin, type I cytoskeletal 10 OS=Homo sapiens GN=KRT10 PE=1 SV=6	sp|P13645	59 kDa	1	2	1	2	2	3	1	3	1	2	4	2	1	6	3	3	5	7	5	6	5	5	14	14	0.0328026	0.0643632	-1.87639	NS	0.0371588	-2.87946	NS	0.162295	-1.58758	NS
280	Protein SEC13 homolog OS=Homo sapiens GN=SEC13 PE=1 SV=3	sp|P55735	36 kDa	1	1	1	1	1	1	3	1	1	1	1	1	7	8	8	5	6	12	6	7	8	10	4	9	0.798199	0.553647	-1.16718	NS	0.64146	-1.12912	NS	0.916478	1.02701	NS
281	60S ribosomal protein L9 OS=Homo sapiens GN=RPL9 PE=1 SV=1	sp|P32969	22 kDa	1	2	2	2	1	2	3	3	2	2	2	2	2	7	5	4	3	5	6	5	6	6	4	4	0.900419	0.689474	-1.14071	NS	0.703635	-1.1316	NS	0.95835	-1.01688	NS
282	Protein S100-A10 OS=Homo sapiens GN=S100A10 PE=1 SV=2	sp|P60903	11 kDa	2	1	2	3	1	1	2	1	0	0	2	2	3	1	6	4	2	4	3	2	0	0	5	3	0.473929	0.711231	1.16077	NS	0.279364	1.60241	NS	0.319632	1.8647	NS
283	Diablo homolog, mitochondrial OS=Homo sapiens GN=DIABLO PE=1 SV=1	sp|Q9NR28	27 kDa	3	1	3	2	4	2	2	2	4	3	3	2	6	2	7	6	12	4	6	4	11	5	8	4	0.489973	0.346251	-1.31785	NS	0.254101	-1.38771	NS	0.847649	-1.05373	NS
284	Rab GDP dissociation inhibitor beta OS=Homo sapiens GN=GDI2 PE=1 SV=2	sp|P50395	51 kDa	1	4	2	2	0	5	5	4	1	5	4	2	1	5	4	3	0	7	6	4	3	5	4	3	0.734592	0.330616	-1.42935	NS	0.657684	-1.18277	NS	0.618713	1.19262	NS
285	14-3-3 protein eta OS=Homo sapiens GN=YWHAH PE=1 SV=4	sp|Q04917	28 kDa	3	3	3	3	3	3	3	2	3	4	3	2	13	9	12	13	12	8	7	10	11	15	11	8	0.674067	0.409617	1.19845	NS	0.938755	1.01617	NS	0.448754	-1.18273	NS
286	Dual specificity protein phosphatase 3 OS=Homo sapiens GN=DUSP3 PE=1 SV=1	sp|P51452	20 kDa	3	2	2	2	2	2	2	3	3	4	2	3	8	4	7	5	6	4	5	5	8	7	6	7	0.564948	0.694706	1.12624	NS	0.504687	-1.20375	NS	0.286402	-1.36367	NS
287	Cystatin-B OS=Homo sapiens GN=CSTB PE=1 SV=2	sp|P04080	11 kDa	2	2	2	3	2	2	2	1	1	1	2	1	6	6	9	7	7	6	7	5	5	5	8	6	0.909917	0.884312	1.04092	NS	0.692465	1.11628	NS	0.784173	1.08145	NS
288	Eukaryotic translation initiation factor 3 subunit A OS=Homo sapiens GN=EIF3A PE=1 SV=1	sp|Q14152	167 kDa	0	3	2	2	1	5	4	3	1	0	3	1	0	4	5	3	1	8	9	3	1	0	6	2	0.32494	0.0668418	-1.94829	NS	0.587182	1.31897	NS	0.10104	2.55492	NS
289	40S ribosomal protein S23 OS=Homo sapiens GN=RPS23 PE=1 SV=3	sp|P62266	16 kDa	1	1	1	1	1	1	1	1	1	1	1	1	8	7	7	7	6	6	7	8	6	11	7	5	0.986644	0.98219	1.006	NS	0.938768	-1.0204	NS	0.892742	-1.03673	NS
290	6-phosphogluconolactonase OS=Homo sapiens GN=PGLS PE=1 SV=2	sp|O95336	28 kDa	4	1	2	1	6	2	1	1	4	3	1	3	5	1	2	1	7	2	1	1	5	3	1	4	0.676057	0.648217	-1.22736	NS	0.371043	-1.46939	NS	0.68232	-1.18228	NS
291	Vigilin OS=Homo sapiens GN=HDLBP PE=1 SV=2	sp|Q00341	141 kDa	0	2	6	5	1	4	6	3	1	1	4	4	0	4	12	8	1	5	7	3	1	1	8	5	0.860254	0.395934	1.31306	NS	0.238939	1.46711	NS	0.719026	1.13804	NS
292	ATP-citrate synthase OS=Homo sapiens GN=ACLY PE=1 SV=3	sp|P53396	121 kDa	3	1	3	5	5	4	4	1	3	5	1	4	4	1	4	11	8	5	6	1	3	8	2	6	0.966032	0.822331	-1.12068	NS	0.913405	-1.04785	NS	0.913822	1.05227	NS
293	60S ribosomal protein L15 OS=Homo sapiens GN=RPL15 PE=1 SV=2	sp|P61313	24 kDa	1	2	1	1	1	2	1	2	1	1	2	2	3	3	5	5	3	3	3	4	4	6	5	3	0.717024	0.732351	1.13621	NS	0.657285	-1.16468	NS	0.422431	-1.33688	NS
294	Peptidyl-prolyl cis-trans isomerase FKBP1A OS=Homo sapiens GN=FKBP1A PE=1 SV=2	sp|P62942	12 kDa	2	2	2	2	2	2	2	2	2	2	2	2	7	7	9	10	10	8	6	7	6	5	6	4	0.229312	0.993462	1.00206	NS	0.133147	1.51384	NS	0.136597	1.51707	NS
295	60S ribosomal protein L22 OS=Homo sapiens GN=RPL22 PE=1 SV=2	sp|P35268	15 kDa	3	3	3	3	3	2	1	2	1	3	2	2	7	7	6	5	7	5	5	5	4	11	4	7	0.894808	0.792801	1.07991	NS	0.84613	-1.05592	NS	0.632253	-1.14852	NS
296	Lysosomal protective protein OS=Homo sapiens GN=CTSA PE=1 SV=2	sp|P10619	54 kDa	2	1	2	1	2	1	2	2	2	3	2	1	11	4	4	5	9	7	5	5	10	9	5	3	0.833373	0.691442	-1.11907	NS	0.654141	-1.13392	NS	0.95446	-1.01582	NS
297	Rho-related GTP-binding protein RhoC OS=Homo sapiens GN=RHOC PE=1 SV=1	sp|P08134	22 kDa	3	2	3	2	2	2	3	3	2	5	2	2	6	4	7	3	4	3	4	5	2	7	5	2	0.828282	0.653139	1.16264	NS	0.550817	1.22106	NS	0.908522	1.04148	NS
298	Aminopeptidase N OS=Homo sapiens GN=ANPEP PE=1 SV=4	sp|P15144	110 kDa	1	0	6	3	2	3	4	2	1	0	4	2	1	0	15	4	3	5	9	3	1	0	10	2	0.463735	0.458074	-1.47875	NS	0.368386	1.36696	NS	0.142	1.89155	NS
299	Dihydrolipoyl dehydrogenase, mitochondrial OS=Homo sapiens GN=DLD PE=1 SV=2	sp|P09622	54 kDa	3	1	4	3	3	3	4	4	3	5	4	1	5	2	7	7	5	8	7	4	8	10	7	2	0.608978	0.474777	-1.23824	NS	0.527768	-1.28642	NS	0.777776	-1.08238	NS
300	Costars family protein C6orf115 OS=Homo sapiens GN=C6orf115 PE=1 SV=1	sp|Q9P1F3	9 kDa	1	1	2	1	1	1	1	1	1	1	1	1	5	4	8	6	5	3	6	3	5	9	5	5	0.588614	0.49701	1.242	NS	0.800798	-1.07647	NS	0.326206	-1.36239	NS
301	Proactivator polypeptide OS=Homo sapiens GN=PSAP PE=1 SV=2	sp|P07602	58 kDa	0	1	1	1	0	1	1	1	0	3	1	2	0	4	1	3	0	4	3	4	0	8	2	3	0.811787	0.404228	-1.45556	NS	0.282978	-1.59114	NS	0.775207	-1.12129	NS
302	Bifunctional aminoacyl-tRNA synthetase OS=Homo sapiens GN=EPRS PE=1 SV=5	sp|P07814	171 kDa	1	1	11	2	0	4	8	1	0	0	3	2	1	1	13	2	0	4	10	1	0	0	3	2	0.480372	0.893039	-1.04889	NS	0.0617261	3.07435	NS	0.106194	3.06424	NS
303	Microsomal glutathione S-transferase 1 OS=Homo sapiens GN=MGST1 PE=1 SV=1	sp|P10620	18 kDa	2	2	4	4	1	2	1	3	3	3	3	4	4	5	7	9	1	3	3	6	6	8	8	5	0.0805595	0.0919154	1.75713	NS	0.675093	-1.12345	NS	0.0616278	-1.99895	NS
304	Citrate synthase, mitochondrial OS=Homo sapiens GN=CS PE=1 SV=2	sp|O75390	52 kDa	3	2	2	2	4	2	2	3	4	1	2	2	5	4	8	5	9	6	5	5	8	3	5	5	0.739734	0.51237	-1.21126	NS	0.987131	1.00494	NS	0.509368	1.21532	NS
305	Fumarylacetoacetase OS=Homo sapiens GN=FAH PE=1 SV=2	sp|P16930	46 kDa	4	2	2	2	3	2	1	2	4	2	2	2	7	5	4	5	7	4	1	2	8	6	5	4	0.362601	0.260661	1.46944	NS	0.716352	-1.11595	NS	0.149764	-1.61804	NS
306	60S ribosomal protein L7a OS=Homo sapiens GN=RPL7A PE=1 SV=2	sp|P62424	30 kDa	2	2	2	2	1	2	2	3	2	3	2	1	4	2	4	6	4	4	2	4	6	6	3	1	0.960092	0.844143	1.07468	NS	0.99141	-1.00433	NS	0.75991	-1.11826	NS
307	T-complex protein 1 subunit theta OS=Homo sapiens GN=CCT8 PE=1 SV=4	sp|P50990	60 kDa	5	2	3	1	3	4	4	1	3	4	4	3	8	3	4	2	7	7	5	2	6	6	7	6	0.399175	0.45211	-1.27769	NS	0.186235	-1.51172	NS	0.632124	-1.15206	NS
308	Methyltransferase-like protein 7B OS=Homo sapiens GN=METTL7B PE=2 SV=2	sp|Q6UX53	28 kDa	1	1	2	0	1	1	1	1	2	0	2	1	1	1	2	0	2	1	1	5	2	0	4	1	0.353636	0.25562	-2.20293	NS	0.312215	-1.86057	NS	0.620154	1.33816	NS
309	Elongation factor 1-gamma OS=Homo sapiens GN=EEF1G PE=1 SV=3	sp|P26641	50 kDa	2	2	3	3	3	3	3	1	3	1	3	2	3	3	5	5	5	6	4	3	4	4	5	3	0.85521	0.594316	-1.20099	NS	0.905624	-1.04285	NS	0.65689	1.1648	NS
310	Peroxiredoxin-4 OS=Homo sapiens GN=PRDX4 PE=1 SV=1	sp|Q13162	31 kDa	3	0	1	1	4	2	1	1	3	1	2	1	13	4	7	6	10	8	8	4	12	7	6	6	0.958254	0.85675	-1.04781	NS	0.82718	-1.05755	NS	0.973887	-1.00842	NS
311	Isoleucyl-tRNA synthetase, cytoplasmic OS=Homo sapiens GN=IARS PE=1 SV=2	sp|P41252	145 kDa	0	2	6	3	0	1	3	2	0	0	3	3	0	2	9	6	0	2	5	3	0	0	4	3	0.548836	0.349303	1.43515	NS	0.074126	2.12135	NS	0.396371	1.4955	NS
312	Tubulin alpha-4A chain OS=Homo sapiens GN=TUBA4A PE=1 SV=1	sp|P68366	50 kDa	2	3	3	3	3	2	3	2	4	2	3	2	56	39	58	50	60	43	56	47	52	41	56	42	0.551415	0.403189	-1.08639	NS	0.815005	1.02389	NS	0.281706	1.11423	NS
313	Argininosuccinate lyase OS=Homo sapiens GN=ASL PE=1 SV=4	sp|P04424	52 kDa	2	5	4	3	3	3	2	1	2	2	3	3	3	8	9	6	5	3	4	1	4	3	6	5	0.158546	0.0948041	1.85928	NS	0.286679	1.38335	NS	0.423675	-1.33588	NS
314	40S ribosomal protein S20 OS=Homo sapiens GN=RPS20 PE=1 SV=1	sp|P60866	13 kDa	1	2	2	2	0	1	2	1	0	0	1	1	2	2	3	2	0	1	3	3	0	0	2	2	0.39222	0.778303	1.15231	NS	0.196376	2.11281	NS	0.334478	1.76098	NS
315	S-formylglutathione hydrolase OS=Homo sapiens GN=ESD PE=1 SV=2	sp|P10768	31 kDa	2	2	5	3	2	3	2	2	3	2	3	2	2	4	6	4	6	6	3	3	4	3	6	3	0.855171	0.603873	-1.19533	NS	0.895825	-1.04743	NS	0.662116	1.16192	NS
316	S-adenosylmethionine synthase isoform type-1 OS=Homo sapiens GN=MAT1A PE=1 SV=2	sp|Q00266	44 kDa	2	3	2	2	1	1	1	1	1	2	3	2	8	7	5	4	6	3	3	4	6	7	7	5	0.386438	0.25039	1.44498	NS	0.83404	-1.06176	NS	0.186898	-1.51858	NS
317	Peptidyl-prolyl cis-trans isomerase FKBP5 OS=Homo sapiens GN=FKBP5 PE=1 SV=2	sp|Q13451	51 kDa	2	2	6	2	4	1	2	2	3	1	2	2	2	2	9	7	8	1	3	2	5	1	4	3	0.628501	0.566739	1.32111	NS	0.318918	1.43696	NS	0.815743	1.09392	NS
318	UDP-glucuronosyltransferase 1-6 OS=Homo sapiens GN=UGT1A6 PE=1 SV=2	sp|P19224	61 kDa	2	3	2	2	0	1	2	1	3	4	3	0	2	4	5	3	0	1	5	1	6	4	7	0	0.234581	0.200256	1.84698	NS	0.535856	-1.24992	NS	0.163573	-2.38362	NS
319	Succinyl-CoA ligase [GDP-forming] subunit beta, mitochondrial OS=Homo sapiens GN=SUCLG2 PE=1 SV=2	sp|Q96I99	47 kDa	4	3	2	3	4	3	2	2	4	3	3	3	5	5	2	4	6	4	3	3	6	3	4	4	0.963132	0.933121	-1.03017	NS	0.814264	-1.08533	NS	0.908932	-1.04066	NS
320	Inorganic pyrophosphatase 2, mitochondrial OS=Homo sapiens GN=PPA2 PE=1 SV=2	sp|Q9H2U2	38 kDa	2	2	2	3	2	3	3	1	2	3	2	3	3	6	7	6	7	7	7	4	5	5	4	9	0.806026	0.495546	-1.22063	NS	0.770785	-1.09085	NS	0.696548	1.11926	NS
321	Sulfotransferase 1A1 OS=Homo sapiens GN=SULT1A1 PE=1 SV=3	sp|P50225	34 kDa	3	1	1	1	2	2	0	0	1	1	1	3	5	1	1	3	4	2	0	0	2	1	1	3	0.660493	0.308571	1.67841	NS	0.511096	1.37949	NS	0.668365	-1.3616	NS
322	Myotrophin OS=Homo sapiens GN=MTPN PE=1 SV=2	sp|P58546	13 kDa	1	2	2	2	2	2	2	1	1	2	1	1	3	5	8	6	6	4	7	5	4	4	5	6	0.850904	0.767804	-1.09332	NS	0.753414	1.10339	NS	0.562067	1.19888	NS
323	Adenosylhomocysteinase OS=Homo sapiens GN=AHCY PE=1 SV=4	sp|P23526	48 kDa	2	2	2	2	1	3	3	3	3	3	3	3	3	3	4	2	3	6	5	5	5	4	6	4	0.28074	0.14353	-1.70355	NS	0.173524	-1.64123	NS	0.905463	1.0393	NS
324	Propionyl-CoA carboxylase beta chain, mitochondrial OS=Homo sapiens GN=PCCB PE=1 SV=3	sp|P05166	58 kDa	1	2	2	1	3	2	2	2	3	3	2	2	3	5	5	4	5	8	5	6	6	5	5	6	0.417361	0.19587	-1.50293	NS	0.365915	-1.33771	NS	0.692434	1.12383	NS
325	40S ribosomal protein S3a OS=Homo sapiens GN=RPS3A PE=1 SV=2	sp|P61247	30 kDa	2	1	1	2	2	2	1	1	2	1	0	1	5	3	1	2	3	2	4	2	4	2	0	1	0.555751	0.919458	-1.04415	NS	0.333589	1.58697	NS	0.324492	1.6573	NS
326	Acyl-protein thioesterase 1 OS=Homo sapiens GN=LYPLA1 PE=1 SV=1	sp|O75608	25 kDa	2	2	3	2	2	0	1	1	1	1	2	2	4	4	4	3	2	0	3	2	2	2	3	2	0.254468	0.121384	1.98838	NS	0.247535	1.61694	NS	0.675373	-1.23421	NS
327	Hippocalcin-like protein 1 OS=Homo sapiens GN=HPCAL1 PE=1 SV=3	sp|P37235	22 kDa	4	2	0	2	3	2	1	2	2	1	2	2	9	2	0	6	8	3	1	2	4	2	2	2	0.835373	0.584108	1.21809	NS	0.252326	1.66827	NS	0.40654	1.40684	NS
328	Alpha-1-antitrypsin OS=Homo sapiens GN=SERPINA1 PE=1 SV=3	sp|P01009	47 kDa	2	3	1	2	2	1	4	2	2	3	3	2	2	4	2	3	4	2	7	3	4	5	6	5	0.222696	0.330154	-1.55498	NS	0.086306	-1.87755	NS	0.591228	-1.19692	NS
329	Isocitrate dehydrogenase [NADP], mitochondrial OS=Homo sapiens GN=IDH2 PE=1 SV=2	sp|P48735	51 kDa	2	3	3	0	5	2	2	3	2	3	3	2	4	6	7	0	11	3	4	4	3	5	5	4	0.602088	0.452138	-1.42511	NS	0.947688	-1.02279	NS	0.497974	1.2924	NS
330	X-ray repair cross-complementing protein 6 OS=Homo sapiens GN=XRCC6 PE=1 SV=2	sp|P12956	70 kDa	2	4	1	1	1	1	2	1	1	2	3	2	2	7	4	1	3	4	2	2	1	4	3	3	0.855588	0.615913	1.22367	NS	0.565685	1.25972	NS	0.93151	1.03734	NS
331	Ribonuclease inhibitor OS=Homo sapiens GN=RNH1 PE=1 SV=2	sp|P13489	50 kDa	2	3	3	3	4	3	1	4	3	3	3	3	4	4	4	5	7	4	2	6	6	5	4	5	0.811911	0.634217	-1.17229	NS	0.558986	-1.2124	NS	0.912217	-1.03596	NS
332	Gamma-glutamylcyclotransferase OS=Homo sapiens GN=GGCT PE=1 SV=1	sp|O75223	21 kDa	2	2	3	2	2	1	3	1	1	4	2	2	4	3	5	4	4	3	5	3	2	5	3	3	0.868822	0.968356	-1.01439	NS	0.63684	1.1925	NS	0.63042	1.19977	NS
333	Proteasome subunit beta type-3 OS=Homo sapiens GN=PSMB3 PE=1 SV=2	sp|P49720	23 kDa	3	3	3	3	3	3	2	1	2	3	2	2	6	4	7	4	6	3	6	1	4	6	7	3	0.786084	0.542166	1.22382	NS	0.960454	1.01563	NS	0.591245	-1.19691	NS
334	60S ribosomal protein L36 OS=Homo sapiens GN=RPL36 PE=1 SV=3	sp|Q9Y3U8	12 kDa	2	0	0	0	1	1	1	0	2	0	2	1	3	0	0	0	1	1	1	0	2	0	4	1	0.390886	0.991675	1.00793	NS	0.223303	-2.51466	NS	0.230145	-2.21565	NS
335	60S ribosomal protein L7 OS=Homo sapiens GN=RPL7 PE=1 SV=1	sp|P18124	29 kDa	2	2	2	3	1	2	2	2	2	2	3	1	3	4	3	5	3	8	6	4	4	2	6	2	0.358679	0.231241	-1.49523	NS	0.940184	1.0283	NS	0.202331	1.5716	NS
336	Cocaine esterase OS=Homo sapiens GN=CES2 PE=1 SV=1	sp|O00748	62 kDa	2	2	2	4	2	0	2	3	1	2	1	0	5	3	3	8	4	0	5	3	1	2	1	0	0.0187444	0.327484	1.46951	NS	0.0156299	4.59192	0.0468898	0.143142	2.91236	NS	+
337	Proteasome subunit alpha type-6 OS=Homo sapiens GN=PSMA6 PE=1 SV=1	sp|P60900	27 kDa	2	1	0	1	2	1	1	1	2	3	2	2	7	4	0	5	7	5	7	4	8	5	6	2	0.402647	0.291057	-1.68253	NS	0.44964	-1.43917	NS	0.682808	1.13126	NS
338	ATP synthase subunit alpha, mitochondrial OS=Homo sapiens GN=ATP5A1 PE=1 SV=1	sp|P25705	60 kDa	1	3	3	1	3	1	1	2	1	1	1	1	1	6	7	1	4	1	2	2	1	1	2	1	0.15474	0.617902	1.33618	NS	0.0632504	2.91233	NS	0.259756	1.85011	NS
339	Protein transport protein Sec31A OS=Homo sapiens GN=SEC31A PE=1 SV=3	sp|O94979	133 kDa	0	3	4	4	1	2	2	2	0	1	3	1	0	3	7	5	1	2	2	2	0	1	4	1	0.264081	0.150345	1.9003	NS	0.0762945	2.21594	NS	0.69556	1.24286	NS
340	Medium-chain specific acyl-CoA dehydrogenase, mitochondrial OS=Homo sapiens GN=ACADM PE=1 SV=1	sp|P11310	47 kDa	2	3	1	3	1	4	2	4	2	3	2	3	2	5	1	3	2	6	2	4	2	5	3	3	0.745937	0.493677	-1.31663	NS	0.666527	-1.19293	NS	0.776942	1.11528	NS
341	Aflatoxin B1 aldehyde reductase member 2 OS=Homo sapiens GN=AKR7A2 PE=1 SV=3	sp|O43488	40 kDa	2	2	4	3	1	2	3	2	3	2	3	1	6	2	10	4	3	7	6	4	4	5	8	4	0.994832	0.986928	1.00509	NS	0.987353	-1.00485	NS	0.99691	-1.00121	NS
342	Complement component 1 Q subcomponent-binding protein, mitochondrial OS=Homo sapiens GN=C1QBP PE=1 SV=1	sp|Q07021	31 kDa	1	3	3	2	3	4	2	1	1	2	4	2	3	5	8	5	5	6	5	2	2	2	10	5	0.956553	0.805844	1.08226	NS	0.908748	1.03698	NS	0.909316	1.04676	NS
343	Hydroxysteroid dehydrogenase-like protein 2 OS=Homo sapiens GN=HSDL2 PE=1 SV=1	sp|Q6YN16	45 kDa	0	3	3	1	1	3	2	1	2	2	2	3	0	6	8	2	2	7	6	1	3	6	5	6	0.669176	0.790765	-1.0986	NS	0.427581	-1.34245	NS	0.599561	-1.19209	NS
344	Elongation factor 1-beta OS=Homo sapiens GN=EEF1B2 PE=1 SV=3	sp|P24534	25 kDa	2	2	2	2	2	2	2	2	2	2	2	2	5	7	6	5	7	8	5	4	6	7	6	5	0.933045	0.753994	-1.09593	NS	0.820147	-1.06866	NS	0.914586	1.03146	NS
345	Elongation factor 1-delta OS=Homo sapiens GN=EEF1D PE=1 SV=5	sp|P29692	31 kDa	1	1	3	2	2	1	3	2	1	3	2	1	2	3	9	3	5	3	9	3	4	5	4	1	0.572677	0.397137	-1.32225	NS	0.663255	1.16998	NS	0.253761	1.49648	NS
346	40S ribosomal protein S11 OS=Homo sapiens GN=RPS11 PE=1 SV=3	sp|P62280	18 kDa	2	0	2	2	2	2	1	1	2	2	1	1	5	0	2	3	5	3	3	1	4	3	3	2	0.821759	0.600157	-1.25151	NS	0.615455	-1.23956	NS	0.948444	1.02676	NS
347	60S ribosomal protein L35 OS=Homo sapiens GN=RPL35 PE=1 SV=2	sp|P42766	15 kDa	1	1	1	1	1	1	1	1	1	1	1	1	4	3	3	3	1	1	3	3	4	2	4	3	0.530245	0.358035	1.50451	NS	0.929125	-1.03554	NS	0.311787	-1.56596	NS
348	Microtubule-associated protein 4 OS=Homo sapiens GN=MAP4 PE=1 SV=3	sp|P27816	121 kDa	1	4	0	4	3	4	0	4	1	2	0	4	1	8	0	6	3	9	0	7	1	2	0	6	0.717035	0.467533	-1.27963	NS	0.325714	1.59828	NS	0.0988628	2.07827	NS
349	60S ribosomal protein L27 OS=Homo sapiens GN=RPL27 PE=1 SV=2	sp|P61353	16 kDa	3	2	2	1	1	1	1	1	1	1	0	1	4	3	4	3	1	4	2	1	2	4	0	4	0.507387	0.248757	1.65375	NS	0.445057	1.36943	NS	0.678289	-1.21683	NS
350	Exportin-2 OS=Homo sapiens GN=CSE1L PE=1 SV=3	sp|P55060	110 kDa	1	0	0	0	2	1	0	2	4	2	3	2	2	0	0	0	4	1	0	2	5	2	3	2	0.0232515	0.111664	-2.95046	NS	0.00976331	-6.12299	0.0292899	0.255082	-1.70222	NS	+
351	Protein-arginine deiminase type-1 OS=Homo sapiens GN=PADI1 PE=1 SV=2	sp|Q9ULC6	75 kDa	1	1	1	1	1	1	1	1	1	1	1	1	3	1	2	2	3	1	2	1	1	1	2	1	0.718215	0.880821	1.0808	NS	0.447315	1.53425	NS	0.523091	1.44966	NS
352	Poly(rC)-binding protein 2 OS=Homo sapiens GN=PCBP2 PE=1 SV=1	sp|Q15366	39 kDa	1	2	0	1	3	0	1	0	2	1	1	1	3	3	2	3	6	0	4	3	6	2	5	3	0.578391	0.57822	-1.25606	NS	0.293373	-1.50401	NS	0.622228	-1.20157	NS
353	60S ribosomal protein L32 OS=Homo sapiens GN=RPL32 PE=1 SV=2	sp|P62910	16 kDa	1	2	2	1	1	2	1	1	1	2	2	2	5	5	4	4	4	4	3	3	4	6	4	3	0.85134	0.566861	1.22599	NS	0.905775	1.04088	NS	0.651468	-1.17675	NS
354	Mammalian ependymin-related protein 1 OS=Homo sapiens GN=EPDR1 PE=1 SV=2	sp|Q9UM22	25 kDa	2	3	1	2	2	1	2	2	2	2	1	1	5	4	2	2	5	4	5	4	3	2	1	1	0.0702017	0.303986	-1.45088	NS	0.176156	1.85859	NS	0.0267568	2.6443	NS
355	T-complex protein 1 subunit gamma OS=Homo sapiens GN=CCT3 PE=1 SV=4	sp|P49368	61 kDa	0	3	3	2	0	3	5	3	1	1	3	1	0	4	4	3	0	3	6	4	1	1	3	1	0.413987	0.489343	-1.31958	NS	0.261476	1.74791	NS	0.0902069	2.31286	NS
356	40S ribosomal protein S27-like OS=Homo sapiens GN=RPS27L PE=1 SV=3	sp|Q71UM5	9 kDa	2	0	2	1	1	1	1	1	0	1	1	1	3	0	5	2	2	1	3	3	0	1	5	1	0.760614	0.988302	-1.00677	NS	0.572178	1.31876	NS	0.533234	1.36718	NS
357	Glutamate--cysteine ligase regulatory subunit OS=Homo sapiens GN=GCLM PE=1 SV=1	sp|P48507	31 kDa	2	2	1	2	2	2	1	2	2	2	2	2	8	4	2	4	8	8	2	4	6	7	2	5	0.711579	0.506121	-1.23497	NS	0.729807	-1.11877	NS	0.722247	1.11605	NS
358	Carbonic anhydrase 2 OS=Homo sapiens GN=CA2 PE=1 SV=2	sp|P00918	29 kDa	3	2	1	0	1	1	0	1	2	4	2	2	5	3	3	0	2	2	0	1	5	6	3	3	0.0408191	0.143861	2.18046	NS	0.252584	-1.54945	NS	0.0149522	-3.33452	0.0448567	+
359	Glycyl-tRNA synthetase OS=Homo sapiens GN=GARS PE=1 SV=3	sp|P41250	83 kDa	1	2	3	1	2	2	3	0	2	2	3	1	1	2	6	2	2	2	3	0	3	2	7	1	0.506213	0.475977	1.40755	NS	0.578685	-1.2551	NS	0.221778	-1.75175	NS
360	Aminoacylase-1 OS=Homo sapiens GN=ACY1 PE=1 SV=1	sp|Q03154	46 kDa	1	2	1	1	0	2	1	1	0	3	0	2	1	5	2	2	0	4	2	1	0	3	0	3	0.65032	0.531067	1.35938	NS	0.320479	1.65776	NS	0.732253	1.20094	NS
361	Dynactin subunit 1 OS=Homo sapiens GN=DCTN1 PE=1 SV=3	sp|Q14203	142 kDa	1	1	5	4	2	2	4	1	0	1	4	2	1	1	7	4	2	3	5	1	0	1	4	3	0.675352	0.924167	1.03982	NS	0.373496	1.48454	NS	0.408842	1.46411	NS
362	Transthyretin OS=Homo sapiens GN=TTR PE=1 SV=1	sp|P02766	16 kDa	1	2	3	1	1	1	1	2	3	3	4	1	2	2	5	1	5	3	2	2	5	6	6	4	0.0939432	0.566528	-1.27807	NS	0.0379362	-2.17358	NS	0.135388	-1.69995	NS
363	Tubulin beta-4A chain OS=Homo sapiens GN=TUBB4A PE=1 SV=2	sp|P04350	50 kDa	1	1	1	1	1	1	1	1	1	1	1	1	56	40	49	54	65	43	45	52	51	34	46	51	0.33458	0.373179	-1.09286	NS	0.617948	1.05253	NS	0.155033	1.15578	NS
364	1,4-alpha-glucan-branching enzyme OS=Homo sapiens GN=GBE1 PE=1 SV=3	sp|Q04446	80 kDa	2	2	4	2	1	1	2	1	1	1	3	1	2	3	4	2	2	2	4	1	1	2	4	2	0.922902	0.803672	1.11829	NS	0.728532	1.16863	NS	0.90386	1.05863	NS
365	60S ribosomal protein L34 OS=Homo sapiens GN=RPL34 PE=1 SV=3	sp|P49207	13 kDa	0	1	1	1	0	0	0	2	1	1	0	0	0	1	1	1	0	0	0	2	1	1	0	0	0.89647	0.766042	1.27797	NS	0.659528	1.48967	NS	0.896182	-1.12843	NS
366	Signal recognition particle 14 kDa protein OS=Homo sapiens GN=SRP14 PE=1 SV=2	sp|P37108	15 kDa	1	1	1	1	1	1	1	1	1	1	2	2	4	4	5	3	5	4	4	5	4	4	5	5	0.853304	0.595541	-1.20027	NS	0.653357	-1.16684	NS	0.927139	1.03097	NS
367	Enoyl-CoA hydratase domain-containing protein 1 OS=Homo sapiens GN=ECHDC1 PE=1 SV=2	sp|Q9NTX5	34 kDa	1	1	1	1	2	2	0	0	2	3	1	1	2	1	1	1	3	2	0	0	4	4	1	1	0.307355	0.989571	1.00831	NS	0.19642	-1.98895	NS	0.197083	-1.98634	NS
368	Inorganic pyrophosphatase OS=Homo sapiens GN=PPA1 PE=1 SV=2	sp|Q15181	33 kDa	0	1	2	3	3	1	2	0	2	2	4	3	0	1	3	3	4	1	2	0	2	2	5	3	0.396131	0.946005	-1.04575	NS	0.19131	-1.84037	NS	0.286651	-1.64972	NS
369	Sulfide:quinone oxidoreductase, mitochondrial OS=Homo sapiens GN=SQRDL PE=1 SV=1	sp|Q9Y6N5	50 kDa	1	2	3	2	2	2	3	1	2	1	1	2	1	2	6	2	2	4	6	1	4	4	2	4	0.76701	0.489619	-1.32714	NS	0.483203	-1.35654	NS	0.876547	-1.06993	NS
370	Calpastatin OS=Homo sapiens GN=CAST PE=1 SV=4	sp|P20810	77 kDa	1	0	2	1	1	2	3	1	0	0	1	1	2	0	4	3	1	4	6	2	0	0	2	2	0.135608	0.281057	-1.62884	NS	0.234783	1.93321	NS	0.0433824	3.47162	NS
371	40S ribosomal protein S6 OS=Homo sapiens GN=RPS6 PE=1 SV=1	sp|P62753	29 kDa	1	1	2	2	1	1	1	0	1	2	1	0	2	1	2	4	3	1	1	0	1	2	1	0	0.373396	0.335885	1.70478	NS	0.20149	2.16974	NS	0.726063	1.24884	NS
372	60S ribosomal protein L17 OS=Homo sapiens GN=RPL17 PE=1 SV=3	sp|P18621	21 kDa	3	1	1	1	1	1	1	2	1	1	2	0	3	1	1	1	2	3	2	2	2	1	3	0	0.600004	0.393101	-1.56211	NS	0.965507	-1.0253	NS	0.391043	1.56423	NS
373	Rho GDP-dissociation inhibitor 1 OS=Homo sapiens GN=ARHGDIA PE=1 SV=3	sp|P52565	23 kDa	2	1	1	1	1	1	1	1	1	2	1	0	5	4	2	2	3	2	5	5	6	4	4	0	0.862707	0.627919	-1.22492	NS	0.847389	-1.07698	NS	0.703897	1.21147	NS
374	Hemoglobin subunit delta OS=Homo sapiens GN=HBD PE=1 SV=2	sp|P02042 (+4)	16 kDa	1	1	1	1	1	1	1	1	1	1	1	1	1	1	2	1	1	1	2	2	1	2	1	2	0.907395	0.64035	-1.32672	NS	0.717462	-1.24462	NS	0.951438	1.0358	NS
375	3-mercaptopyruvate sulfurtransferase OS=Homo sapiens GN=MPST PE=1 SV=3	sp|P25325	33 kDa	2	3	1	2	2	3	3	1	2	2	2	1	3	6	2	3	6	5	4	2	3	4	4	2	0.674578	0.529333	-1.25461	NS	0.868995	1.06564	NS	0.410106	1.35279	NS
376	Sulfatase-modifying factor 2 OS=Homo sapiens GN=SUMF2 PE=1 SV=2	sp|Q8NBJ7	34 kDa	1	1	1	2	2	4	2	1	0	0	1	2	1	1	2	3	2	8	4	2	0	0	1	3	0.0560961	0.0998228	-2.44184	NS	0.441337	1.60739	NS	0.0290326	4	NS
377	Histidine triad nucleotide-binding protein 2, mitochondrial OS=Homo sapiens GN=HINT2 PE=1 SV=1	sp|Q9BX68	17 kDa	2	1	3	2	3	3	2	2	1	1	1	1	3	1	5	5	4	5	5	4	3	2	3	1	0.190713	0.341137	-1.40253	NS	0.358245	1.47478	NS	0.0650171	2.077	NS
378	Profilin-2 OS=Homo sapiens GN=PFN2 PE=1 SV=3	sp|P35080	15 kDa	2	1	2	1	1	1	1	2	2	2	2	2	4	1	5	2	2	2	3	4	5	6	3	5	0.277169	0.991655	-1.00438	NS	0.189267	-1.63382	NS	0.162694	-1.68164	NS
379	Nuclease-sensitive element-binding protein 1 OS=Homo sapiens GN=YBX1 PE=1 SV=3	sp|P67809	36 kDa	2	1	2	2	2	3	1	2	2	2	2	2	7	2	3	7	8	4	2	5	7	3	4	4	0.96564	0.908425	-1.03809	NS	0.957585	1.01766	NS	0.84029	1.06855	NS
380	Adipocyte plasma membrane-associated protein OS=Homo sapiens GN=APMAP PE=1 SV=2	sp|Q9HDC9	46 kDa	2	1	0	1	2	1	0	1	2	2	1	1	2	2	0	1	3	1	0	1	4	4	2	1	0.199919	0.975917	1.01838	NS	0.134428	-2.17728	NS	0.134649	-2.17568	NS
381	Adenylyl cyclase-associated protein 1 OS=Homo sapiens GN=CAP1 PE=1 SV=5	sp|Q01518	52 kDa	2	1	1	2	4	0	1	1	1	1	0	1	4	1	1	4	6	0	3	1	1	1	0	1	0.165675	0.922274	-1.04469	NS	0.0578603	3.2343	NS	0.140921	3.3705	NS
382	Na(+)/H(+) exchange regulatory cofactor NHE-RF1 OS=Homo sapiens GN=SLC9A3R1 PE=1 SV=4	sp|O14745	39 kDa	2	2	2	2	2	3	2	1	2	1	2	2	3	6	3	3	4	6	6	3	6	3	6	6	0.513935	0.394723	-1.34094	NS	0.296016	-1.44537	NS	0.840679	-1.06572	NS
383	Actin-related protein 3 OS=Homo sapiens GN=ACTR3 PE=1 SV=3	sp|P61158	47 kDa	2	3	3	2	2	2	2	1	1	1	2	2	2	4	5	4	4	3	4	3	2	1	2	3	0.297247	0.978639	-1.01002	NS	0.174626	1.78836	NS	0.174132	1.80516	NS
384	Leukotriene A-4 hydrolase OS=Homo sapiens GN=LTA4H PE=1 SV=2	sp|P09960	69 kDa	1	2	4	1	2	1	1	2	3	1	2	1	2	2	7	1	2	1	1	2	4	1	2	1	0.427031	0.27978	1.80703	NS	0.449826	1.43545	NS	0.612222	-1.31329	NS
385	SRA stem-loop-interacting RNA-binding protein, mitochondrial OS=Homo sapiens GN=SLIRP PE=1 SV=1	sp|Q9GZT3	12 kDa	1	0	2	0	1	0	3	2	0	2	2	0	2	0	3	0	1	0	3	2	0	2	3	0	0.894845	0.615905	-1.3372	NS	0.941757	-1.04508	NS	0.675614	1.28771	NS
386	40S ribosomal protein S17 OS=Homo sapiens GN=RPS17 PE=1 SV=2	sp|P08708 (+1)	16 kDa	1	3	0	0	2	1	2	2	1	2	1	1	1	3	0	0	3	1	3	5	1	5	1	1	0.157132	0.0694685	-3.3957	NS	0.27346	-1.92005	NS	0.431565	1.57819	NS
387	Sialate O-acetylesterase OS=Homo sapiens GN=SIAE PE=1 SV=1	sp|Q9HAT2	58 kDa	1	2	2	1	1	2	2	1	1	2	2	1	4	5	4	2	4	4	5	5	3	5	5	4	0.777053	0.480862	-1.27931	NS	0.675362	-1.15992	NS	0.777688	1.10021	NS
388	Leukocyte elastase inhibitor OS=Homo sapiens GN=SERPINB1 PE=1 SV=1	sp|P30740	43 kDa	0	2	2	3	1	0	1	0	1	3	1	1	0	3	2	3	1	0	1	0	1	3	1	1	0.166485	0.132557	3.65178	NS	0.617763	1.30801	NS	0.170679	-2.89356	NS
389	GDH/6PGL endoplasmic bifunctional protein OS=Homo sapiens GN=H6PD PE=1 SV=2	sp|O95479	89 kDa	2	2	2	1	3	4	3	1	3	3	3	1	4	2	4	1	6	6	6	1	5	5	4	1	0.262775	0.104788	-1.82933	NS	0.410917	-1.38362	NS	0.426883	1.31459	NS
390	Acylpyruvase FAHD1, mitochondrial OS=Homo sapiens GN=FAHD1 PE=1 SV=2	sp|Q6P587	25 kDa	2	2	1	0	3	2	2	1	2	2	2	1	6	3	1	0	9	3	3	1	5	7	3	1	0.475112	0.241326	-1.59461	NS	0.25779	-1.56902	NS	0.957057	1.01923	NS
391	PDZ and LIM domain protein 1 OS=Homo sapiens GN=PDLIM1 PE=1 SV=4	sp|O00151	36 kDa	3	0	3	1	1	0	1	0	2	0	3	0	3	0	4	1	4	0	1	0	2	0	3	0	0.718058	0.489059	1.45568	NS	0.486502	1.4579	NS	0.972291	1.02027	NS
392	60S ribosomal protein L29 OS=Homo sapiens GN=RPL29 PE=1 SV=2	sp|P47914	18 kDa	1	1	1	1	1	1	1	1	1	1	1	1	4	4	3	3	5	4	5	3	3	5	3	3	0.739555	0.487955	-1.28418	NS	0.964721	-1.01688	NS	0.526088	1.25649	NS
393	Serine hydroxymethyltransferase, cytosolic OS=Homo sapiens GN=SHMT1 PE=1 SV=1	sp|P34896	53 kDa	1	2	2	2	2	4	1	2	2	1	2	3	5	6	4	4	3	4	1	4	5	1	3	6	0.552414	0.247633	1.52459	NS	0.556162	1.23051	NS	0.58967	-1.23162	NS
394	U8 snoRNA-decapping enzyme OS=Homo sapiens GN=NUDT16 PE=1 SV=2	sp|Q96DE0	21 kDa	2	2	2	1	1	1	1	0	1	2	1	1	4	2	3	2	4	1	1	0	3	4	1	1	0.544507	0.24731	1.77811	NS	0.665751	1.21393	NS	0.450986	-1.48212	NS
395	Programmed cell death protein 6 OS=Homo sapiens GN=PDCD6 PE=1 SV=1	sp|O75340	22 kDa	2	1	2	1	2	1	1	1	2	2	2	1	6	1	3	5	8	2	3	4	5	4	4	3	0.869009	0.627195	-1.18786	NS	0.782474	-1.10438	NS	0.820755	1.08214	NS
396	Isocitrate dehydrogenase [NAD] subunit alpha, mitochondrial OS=Homo sapiens GN=IDH3A PE=1 SV=1	sp|P50213	40 kDa	1	1	2	0	3	2	2	1	2	2	4	1	3	2	4	0	7	3	3	3	4	5	7	1	0.184499	0.126147	-1.86827	NS	0.0998073	-1.93855	NS	0.93922	-1.02693	NS
397	4-trimethylaminobutyraldehyde dehydrogenase OS=Homo sapiens GN=ALDH9A1 PE=1 SV=3	sp|P49189	54 kDa	0	2	2	3	1	0	1	1	1	2	2	3	0	2	3	3	1	0	1	1	1	3	2	3	0.200814	0.177118	2.38113	NS	0.731141	-1.18172	NS	0.0882267	-2.89852	NS
398	Acyl-coenzyme A synthetase ACSM2A, mitochondrial OS=Homo sapiens GN=ACSM2A PE=1 SV=2	sp|Q08AH3	64 kDa	3	1	0	3	1	1	2	2	1	1	2	2	14	10	9	15	14	10	6	16	15	10	11	12	0.98654	0.97395	-1.00677	NS	0.87392	-1.03296	NS	0.910816	-1.02339	NS
399	Ras-related protein Rab-11A OS=Homo sapiens GN=RAB11A PE=1 SV=3	sp|P62491 (+1)	24 kDa	2	2	2	2	1	2	2	0	1	2	1	2	2	3	3	3	1	3	3	0	3	3	2	3	0.625556	0.428458	1.46136	NS	0.944372	-1.03023	NS	0.387878	-1.51093	NS
400	Glutathione peroxidase 1 OS=Homo sapiens GN=GPX1 PE=1 SV=4	sp|P07203	22 kDa	1	0	2	0	1	0	0	1	0	0	0	0	1	0	3	0	2	0	0	1	0	0	0	0	0.0923448	0.850856	1.15708	NS	0.12071	4.7397	NS	0.170192	3.93868	NS
401	SPRY domain-containing protein 4 OS=Homo sapiens GN=SPRYD4 PE=1 SV=2	sp|Q8WW59	23 kDa	2	1	2	2	1	1	0	2	1	1	2	2	2	1	2	2	1	2	0	3	1	1	2	3	0.973444	0.862274	1.10137	NS	0.91374	-1.05966	NS	0.814097	-1.13961	NS
402	Methylmalonyl-CoA mutase, mitochondrial OS=Homo sapiens GN=MUT PE=1 SV=4	sp|P22033	83 kDa	0	1	3	1	1	1	3	1	0	4	4	0	0	1	5	1	1	1	4	2	0	5	7	0	0.862602	0.57479	-1.33694	NS	0.219401	-1.75441	NS	0.576021	-1.3883	NS
403	Sorbitol dehydrogenase OS=Homo sapiens GN=SORD PE=1 SV=4	sp|Q00796	38 kDa	3	0	2	2	4	0	0	1	4	2	2	3	4	0	6	3	4	0	0	1	8	4	2	3	0.0820852	0.143032	2.36235	NS	0.470409	-1.38547	NS	0.0175994	-3.41061	NS
404	Isochorismatase domain-containing protein 2, mitochondrial OS=Homo sapiens GN=ISOC2 PE=1 SV=1	sp|Q96AB3	22 kDa	2	1	1	3	2	0	1	2	1	2	3	1	2	1	3	5	3	0	1	2	3	2	4	2	0.442888	0.292538	1.68916	NS	0.892858	-1.05917	NS	0.243121	-1.7857	NS
405	Receptor expression-enhancing protein 6 OS=Homo sapiens GN=REEP6 PE=1 SV=1	sp|Q96HR9	21 kDa	2	2	2	2	1	2	1	2	2	2	2	1	2	4	3	5	1	4	3	3	6	7	7	3	0.10302	0.676462	1.18288	NS	0.1241	-1.68843	NS	0.0578558	-2.00642	NS
406	Acyl-CoA-binding protein OS=Homo sapiens GN=DBI PE=1 SV=2	sp|P07108	10 kDa	0	1	1	2	0	0	1	1	0	0	1	1	0	1	2	2	0	0	2	1	0	0	1	1	0.536402	0.644616	1.36719	NS	0.33339	2.03929	NS	0.654468	1.40499	NS
407	S-phase kinase-associated protein 1 OS=Homo sapiens GN=SKP1 PE=1 SV=2	sp|P63208	19 kDa	1	1	1	2	1	1	1	1	1	1	1	1	5	2	2	5	6	3	4	2	4	2	2	1	0.409397	0.755255	-1.123	NS	0.325488	1.51526	NS	0.197863	1.70616	NS
408	F-actin-capping protein subunit alpha-1 OS=Homo sapiens GN=CAPZA1 PE=1 SV=3	sp|P52907	33 kDa	1	1	2	1	2	2	1	1	1	1	1	2	3	2	4	1	4	3	2	5	4	2	3	2	0.608201	0.33143	-1.49145	NS	0.770947	-1.13568	NS	0.513977	1.29962	NS
409	60S ribosomal protein L5 OS=Homo sapiens GN=RPL5 PE=1 SV=3	sp|P46777	34 kDa	0	1	3	2	0	2	3	3	2	2	2	1	0	1	3	3	0	4	5	3	3	3	4	1	0.40912	0.163732	-1.88226	NS	0.293649	-1.65101	NS	0.732281	1.15347	NS
410	60S ribosomal protein L26 OS=Homo sapiens GN=RPL26 PE=1 SV=1	sp|P61254 (+1)	17 kDa	2	1	0	0	2	1	0	1	1	1	0	1	2	1	0	0	2	2	0	1	1	1	0	1	0.663892	0.530546	-1.5278	NS	0.981431	1.01776	NS	0.501294	1.57469	NS
411	Acetyl-coenzyme A synthetase, cytoplasmic OS=Homo sapiens GN=ACSS2 PE=1 SV=1	sp|Q9NR19	79 kDa	1	4	4	4	0	2	3	1	0	1	3	2	1	6	5	4	0	3	4	1	0	1	5	2	0.332875	0.15525	1.82277	NS	0.147149	1.93032	NS	0.878086	1.07728	NS
412	Abhydrolase domain-containing protein 14B OS=Homo sapiens GN=ABHD14B PE=1 SV=1	sp|Q96IU4	22 kDa	1	2	1	1	0	2	1	2	1	0	1	1	2	4	2	1	0	4	1	2	1	0	1	1	0.218358	0.670252	1.23884	NS	0.108515	2.96321	NS	0.318461	2.40742	NS
413	Quinone oxidoreductase OS=Homo sapiens GN=CRYZ PE=1 SV=1	sp|Q08257	35 kDa	1	1	2	3	1	0	1	1	1	1	2	0	1	1	2	3	1	0	1	1	1	1	3	0	0.498642	0.259985	2.11263	NS	0.634105	1.31946	NS	0.526926	-1.57694	NS
414	SH3 domain-binding glutamic acid-rich-like protein OS=Homo sapiens GN=SH3BGRL PE=1 SV=1	sp|O75368	13 kDa	2	2	1	1	1	1	1	1	1	1	2	1	4	4	4	2	3	3	3	4	3	3	4	4	0.992803	0.971898	1.01369	NS	0.934151	-1.03175	NS	0.914414	-1.04227	NS
415	Cell division control protein 42 homolog OS=Homo sapiens GN=CDC42 PE=1 SV=2	sp|P60953	21 kDa	0	0	0	0	2	0	0	1	1	1	0	1	0	0	0	0	5	0	0	1	1	1	0	1	0.0660399	0.0706335	-6.84192	NS	0.110998	-7.02793	NS	0.430449	1.82219	NS
416	Proteasome subunit alpha type-1 OS=Homo sapiens GN=PSMA1 PE=1 SV=1	sp|P25786	30 kDa	2	2	2	3	2	2	1	1	2	2	2	1	4	3	2	3	2	3	1	2	4	5	5	3	0.212733	0.410287	1.45178	NS	0.321304	-1.44972	NS	0.0823077	-2.05543	NS
417	Pyridoxal kinase OS=Homo sapiens GN=PDXK PE=1 SV=1	sp|O00764	35 kDa	1	2	2	1	1	2	2	1	1	1	0	0	1	4	5	1	1	2	2	1	1	2	0	0	0.109906	0.29752	1.6807	NS	0.057365	3.63953	NS	0.286348	2.07807	NS
418	Hydroxymethylglutaryl-CoA synthase, mitochondrial OS=Homo sapiens GN=HMGCS2 PE=1 SV=1	sp|P54868	57 kDa	3	0	2	1	0	0	0	1	2	1	2	2	4	0	3	1	0	0	0	1	3	3	2	2	0.0133006	0.0657877	5.31416	NS	0.5938	-1.28705	NS	0.00888353	-9.77839	0.0266506	+
419	Alanyl-tRNA synthetase, cytoplasmic OS=Homo sapiens GN=AARS PE=1 SV=2	sp|P49588	107 kDa	2	1	4	2	4	1	2	0	2	2	2	2	5	1	4	4	7	1	4	0	3	4	4	2	0.972453	0.808021	1.10044	NS	0.925035	1.03693	NS	0.817734	-1.12688	NS
420	Calpain-1 catalytic subunit OS=Homo sapiens GN=CAPN1 PE=1 SV=1	sp|P07384	82 kDa	0	0	3	0	0	1	1	1	1	1	4	1	0	0	3	0	0	2	1	1	1	1	4	2	0.259381	0.580837	-1.59067	NS	0.0936722	-2.90859	NS	0.286293	-1.88761	NS
421	40S ribosomal protein S21 OS=Homo sapiens GN=RPS21 PE=1 SV=1	sp|P63220	9 kDa	0	0	2	1	0	1	2	1	1	1	1	1	0	0	4	2	0	1	4	1	1	3	1	2	0.887587	0.759377	-1.18554	NS	0.565386	-1.49232	NS	0.779644	-1.19337	NS
422	60S ribosomal protein L28 OS=Homo sapiens GN=RPL28 PE=1 SV=3	sp|P46779	16 kDa	1	1	1	1	1	1	1	1	1	1	1	0	2	2	3	3	1	1	1	3	1	2	1	0	0.28695	0.401023	1.53454	NS	0.114513	2.43284	NS	0.495196	1.54611	NS
423	Tubulin-specific chaperone A OS=Homo sapiens GN=TBCA PE=1 SV=3	sp|O75347	13 kDa	1	1	1	1	1	1	1	2	1	2	1	0	2	2	2	2	1	2	2	3	2	2	2	0	0.824756	0.882238	-1.07703	NS	0.616786	1.3089	NS	0.542979	1.38658	NS
424	Acylamino-acid-releasing enzyme OS=Homo sapiens GN=APEH PE=1 SV=4	sp|P13798	81 kDa	1	1	3	2	2	1	3	1	3	1	3	1	1	1	6	2	3	1	5	1	3	2	5	3	0.754971	0.768939	-1.14077	NS	0.432267	-1.38952	NS	0.608666	-1.23946	NS
425	Apolipoprotein A-I-binding protein OS=Homo sapiens GN=APOA1BP PE=1 SV=2	sp|Q8NCW5	32 kDa	1	1	1	2	1	1	1	1	1	2	2	1	2	1	1	2	4	1	1	2	1	3	4	1	0.683056	0.547485	-1.38207	NS	0.40029	-1.55447	NS	0.876139	-1.08551	NS
426	Proteasome subunit beta type-6 OS=Homo sapiens GN=PSMB6 PE=1 SV=4	sp|P28072	25 kDa	1	1	1	1	1	1	2	1	1	1	1	1	2	2	5	4	5	1	6	3	2	3	4	3	0.783411	0.515557	-1.27951	NS	0.947823	1.02656	NS	0.493272	1.30288	NS
427	Beta-lactamase-like protein 2 OS=Homo sapiens GN=LACTB2 PE=1 SV=2	sp|Q53H82	33 kDa	2	2	1	1	2	1	0	1	1	2	2	2	3	3	1	1	2	1	0	1	2	3	2	2	0.378586	0.242826	2.00396	NS	0.801461	-1.12998	NS	0.170953	-2.20592	NS
428	40S ribosomal protein S28 OS=Homo sapiens GN=RPS28 PE=1 SV=1	sp|P62857	8 kDa	1	1	2	2	1	1	2	1	0	1	1	1	2	2	8	6	2	1	6	4	0	2	2	4	0.296408	0.594729	1.21299	NS	0.0805187	2.09012	NS	0.235001	1.70753	NS
429	Short/branched chain specific acyl-CoA dehydrogenase, mitochondrial OS=Homo sapiens GN=ACADSB PE=1 SV=1	sp|P45954	47 kDa	3	2	1	2	1	0	1	1	2	2	0	0	4	2	2	2	2	0	2	3	3	3	0	0	0.63114	0.548411	1.34213	NS	0.307198	1.68058	NS	0.669557	1.34409	NS
430	Septin-2 OS=Homo sapiens GN=SEPT2 PE=1 SV=1	sp|Q15019	41 kDa	1	1	1	1	5	3	1	2	4	3	1	1	2	2	2	3	8	5	1	2	5	3	2	2	0.296881	0.194137	-1.80832	NS	0.479749	-1.36374	NS	0.437316	1.34336	NS
431	Proteasome subunit alpha type-4 OS=Homo sapiens GN=PSMA4 PE=1 SV=1	sp|P25789	29 kDa	1	1	2	0	2	1	1	1	2	2	1	2	2	1	2	0	6	1	1	2	2	4	1	3	0.289786	0.18592	-2.05427	NS	0.203173	-2.02682	NS	0.963718	-1.02264	NS
432	Heat shock 70 kDa protein 4 OS=Homo sapiens GN=HSPA4 PE=1 SV=4	sp|P34932	94 kDa	3	0	1	1	7	0	1	1	2	2	1	1	4	0	2	1	10	0	3	1	4	2	1	1	0.728522	0.129774	-1.987	NS	0.773067	-1.16087	NS	0.290061	1.75201	NS
433	Succinyl-CoA ligase [ADP/GDP-forming] subunit alpha, mitochondrial OS=Homo sapiens GN=SUCLG1 PE=1 SV=4	sp|P53597	36 kDa	1	1	2	1	1	1	1	1	2	1	2	1	3	3	5	3	4	3	3	2	4	3	5	2	0.948727	0.828194	1.08923	NS	0.918872	-1.03929	NS	0.762012	-1.12643	NS
434	Obg-like ATPase 1 OS=Homo sapiens GN=OLA1 PE=1 SV=2	sp|Q9NTK5	45 kDa	1	1	2	1	1	2	1	0	1	2	2	1	6	2	5	3	2	5	3	0	3	2	4	2	0.534873	0.337419	1.55768	NS	0.389004	1.3979	NS	0.909163	-1.05112	NS
435	Proteasome subunit alpha type-2 OS=Homo sapiens GN=PSMA2 PE=1 SV=2	sp|P25787	26 kDa	3	1	2	1	2	0	2	0	1	2	1	0	5	2	2	1	2	0	2	0	1	4	1	0	0.34906	0.119919	2.4135	NS	0.326242	1.71563	NS	0.68202	-1.33227	NS
436	Septin-9 OS=Homo sapiens GN=SEPT9 PE=1 SV=2	sp|Q9UHD8	65 kDa	3	2	1	2	1	1	1	2	0	1	1	1	3	2	1	2	1	1	1	3	0	2	1	1	0.540285	0.656982	1.27012	NS	0.253254	1.97424	NS	0.491037	1.55255	NS
437	60S ribosomal protein L35a OS=Homo sapiens GN=RPL35A PE=1 SV=2	sp|P18077	13 kDa	0	1	1	1	0	0	0	0	0	1	0	0	0	1	1	1	0	0	0	0	0	1	0	0	0.128537	0.128685	6.49983	NS	0.371049	2.30871	NS	0.622967	-1.64835	NS
438	Ester hydrolase C11orf54 OS=Homo sapiens GN=C11orf54 PE=1 SV=1	sp|Q9H0W9	35 kDa	2	1	2	1	1	0	1	0	2	1	1	0	3	1	5	3	2	0	1	0	2	2	1	0	0.0541076	0.0327418	3.65681	NS	0.11982	2.30911	NS	0.52106	-1.54283	NS
439	Plectin OS=Homo sapiens GN=PLEC PE=1 SV=3	sp|Q15149	532 kDa	0	1	1	1	0	3	1	1	0	0	2	0	0	1	1	1	0	4	1	1	0	0	3	0	0.551244	0.300107	-1.95644	NS	0.924979	-1.07384	NS	0.316634	2.17975	NS
440	Nucleoside diphosphate kinase A OS=Homo sapiens GN=NME1 PE=1 SV=1	sp|P15531	17 kDa	2	1	2	2	1	0	1	1	2	1	1	1	6	5	4	5	2	2	2	2	5	4	2	5	0.0936399	0.0326334	2.38017	NS	0.550048	1.22151	NS	0.109461	-1.96118	NS
441	AP-1 complex subunit beta-1 OS=Homo sapiens GN=AP1B1 PE=1 SV=2	sp|Q10567	105 kDa	2	1	1	2	1	0	1	1	1	1	2	0	3	1	3	2	2	0	1	1	2	2	3	0	0.430155	0.201247	2.09811	NS	0.666689	1.24169	NS	0.395771	-1.68679	NS
442	Beta-hexosaminidase subunit beta OS=Homo sapiens GN=HEXB PE=1 SV=3	sp|P07686	63 kDa	1	0	0	0	1	2	1	1	2	2	1	2	1	0	0	0	2	4	1	1	2	4	1	2	0.0144561	0.0231201	-8.03304	0.0462401	0.0143165	-8.97035	0.0429495	0.850004	-1.0962	NS	+
443	Cytochrome b5 OS=Homo sapiens GN=CYB5A PE=1 SV=2	sp|P00167	15 kDa	1	1	1	1	0	1	1	0	1	0	0	1	2	1	1	1	0	1	1	0	1	0	0	3	0.552937	0.278537	2.37486	NS	0.79293	1.1941	NS	0.58157	-1.64941	NS
444	60S ribosomal protein L13a OS=Homo sapiens GN=RPL13A PE=1 SV=2	sp|P40429	24 kDa	1	0	1	0	1	1	0	1	1	1	1	1	1	0	2	0	3	2	0	1	2	2	3	1	0.274278	0.35968	-2.04889	NS	0.108413	-2.78558	NS	0.624121	-1.30145	NS
445	Nascent polypeptide-associated complex subunit alpha OS=Homo sapiens GN=NACA PE=1 SV=1	sp|Q13765	23 kDa	2	1	2	2	2	2	2	2	2	1	2	2	5	2	5	2	7	2	5	5	2	1	3	3	0.138984	0.283709	-1.4563	NS	0.350745	1.48374	NS	0.0498802	2.17015	NS
446	Alcohol dehydrogenase class-3 OS=Homo sapiens GN=ADH5 PE=1 SV=4	sp|P11766	40 kDa	1	0	1	1	1	2	2	2	2	2	2	2	2	0	1	1	1	2	3	3	3	2	5	2	0.101227	0.127594	-2.46567	NS	0.0411693	-3.15239	NS	0.583442	-1.2723	NS
447	Coatomer subunit gamma OS=Homo sapiens GN=COPG PE=1 SV=1	sp|Q9Y678	98 kDa	3	0	3	1	2	0	1	1	2	1	1	0	3	0	5	1	2	0	2	1	3	2	1	0	0.606876	0.401691	1.55774	NS	0.514019	1.45063	NS	0.791777	-1.1731	NS
448	Citrate lyase subunit beta-like protein, mitochondrial OS=Homo sapiens GN=CLYBL PE=2 SV=2	sp|Q8N0X4	37 kDa	0	2	1	2	1	4	0	2	0	0	1	0	0	3	1	3	1	4	0	2	0	0	1	0	0.110827	0.949436	-1.03452	NS	0.0770423	4.83657	NS	0.0555625	5.695	NS
449	Protein CutA OS=Homo sapiens GN=CUTA PE=1 SV=2	sp|O60888	19 kDa	1	1	2	1	0	0	1	0	1	2	2	2	3	1	2	1	0	0	1	0	1	3	2	2	0.0375892	0.0402549	6.53909	NS	0.758111	-1.17273	NS	0.0228405	-7.61211	NS
450	Protein ETHE1, mitochondrial OS=Homo sapiens GN=ETHE1 PE=1 SV=2	sp|O95571	28 kDa	1	0	1	1	1	1	1	1	1	1	1	1	3	0	3	1	5	1	1	2	3	3	3	5	0.261632	0.550745	-1.34983	NS	0.113763	-2.10071	NS	0.312259	-1.53238	NS
451	Farnesyl pyrophosphate synthase OS=Homo sapiens GN=FDPS PE=1 SV=4	sp|P14324	48 kDa	1	1	3	1	1	0	1	0	2	1	1	1	3	1	4	2	1	0	1	0	2	1	1	2	0.0708547	0.0259285	4.57783	NS	0.362346	1.58996	NS	0.156128	-2.94017	NS
452	Protein transport protein Sec24C OS=Homo sapiens GN=SEC24C PE=1 SV=3	sp|P53992	118 kDa	1	2	1	2	1	2	1	1	0	1	0	3	1	2	1	2	1	2	1	2	0	2	0	3	0.935998	0.924623	-1.05624	NS	0.801053	1.16473	NS	0.732209	1.22972	NS
453	Protein diaphanous homolog 1 OS=Homo sapiens GN=DIAPH1 PE=1 SV=2	sp|O60610	141 kDa	0	1	2	1	0	1	2	2	0	0	2	2	0	2	4	1	0	1	5	2	0	0	3	2	0.790959	0.585258	-1.31453	NS	0.675662	1.26352	NS	0.347095	1.66211	NS
454	Eukaryotic translation initiation factor 2 subunit 1 OS=Homo sapiens GN=EIF2S1 PE=1 SV=3	sp|P05198	36 kDa	1	1	1	1	1	1	1	1	2	2	1	1	4	1	3	3	4	2	3	6	5	5	2	4	0.517947	0.332185	-1.46668	NS	0.302428	-1.49273	NS	0.897948	-1.04718	NS
455	Aldehyde dehydrogenase X, mitochondrial OS=Homo sapiens GN=ALDH1B1 PE=1 SV=3	sp|P30837	57 kDa	2	1	0	1	1	3	1	1	1	2	2	2	2	1	0	2	3	4	3	1	2	5	4	4	0.0584704	0.133747	-2.28221	NS	0.0408992	-3.09172	NS	0.494293	-1.30991	NS
456	Tubulin beta-2A chain OS=Homo sapiens GN=TUBB2A PE=1 SV=1	sp|Q13885	50 kDa	2	1	2	1	2	1	2	2	1	2	2	1	52	45	50	55	61	47	41	58	51	35	49	54	0.46144	0.400045	-1.08697	NS	0.781755	1.02846	NS	0.245521	1.12395	NS
457	Hemoglobin subunit alpha OS=Homo sapiens GN=HBA1 PE=1 SV=2	sp|P69905	15 kDa	2	0	1	1	1	0	1	0	0	0	0	0	2	0	1	1	1	0	1	0	0	0	0	0	0.0671278	0.492139	1.7027	NS	0.063281	8.68129	NS	0.29694	3.06351	NS
458	Propionyl-CoA carboxylase alpha chain, mitochondrial OS=Homo sapiens GN=PCCA PE=1 SV=4	sp|P05165	80 kDa	1	1	1	2	2	1	2	1	1	0	2	1	3	1	2	4	5	4	4	4	2	0	4	3	0.177522	0.129471	-1.81138	NS	0.937505	1.0367	NS	0.0954268	1.95469	NS
459	Sulfiredoxin-1 OS=Homo sapiens GN=SRXN1 PE=1 SV=2	sp|Q9BYN0	14 kDa	2	1	1	1	1	1	1	1	1	1	1	2	4	2	2	1	3	2	2	3	2	1	3	3	0.92718	0.746316	-1.16043	NS	0.938237	-1.03724	NS	0.770096	1.14366	NS
460	Coatomer subunit zeta-1 OS=Homo sapiens GN=COPZ1 PE=1 SV=1	sp|P61923	20 kDa	2	0	1	1	2	1	1	0	1	1	0	0	2	0	2	1	2	1	1	0	1	2	0	0	0.800047	0.806383	1.17867	NS	0.512986	1.68121	NS	0.705659	1.30758	NS
461	Cytoplasmic aconitate hydratase OS=Homo sapiens GN=ACO1 PE=1 SV=3	sp|P21399	98 kDa	3	1	1	0	1	0	2	0	3	2	1	0	3	1	1	0	2	0	3	0	4	2	1	0	0.822402	0.928868	-1.05545	NS	0.59549	-1.34508	NS	0.610759	-1.32998	NS
462	Ubiquitin-conjugating enzyme E2 L3 OS=Homo sapiens GN=UBE2L3 PE=1 SV=1	sp|P68036	18 kDa	0	0	1	2	1	0	0	2	1	1	0	1	0	0	1	3	1	0	0	3	1	1	0	1	0.965949	0.882637	-1.10354	NS	0.772246	1.24645	NS	0.726899	1.28142	NS
463	Protein-L-isoaspartate(D-aspartate) O-methyltransferase OS=Homo sapiens GN=PCMT1 PE=1 SV=4	sp|P22061	25 kDa	2	1	1	1	1	1	2	1	1	1	2	1	3	3	1	2	2	2	2	1	2	2	3	3	0.800927	0.664592	1.24371	NS	0.773449	-1.14144	NS	0.513075	-1.37728	NS
464	Peroxisomal acyl-coenzyme A oxidase 1 OS=Homo sapiens GN=ACOX1 PE=1 SV=3	sp|Q15067	74 kDa	1	1	1	2	1	1	1	1	2	1	1	1	1	3	2	3	1	2	2	4	2	2	2	1	0.844689	0.864963	-1.08362	NS	0.65504	1.25179	NS	0.569123	1.33085	NS
465	X-ray repair cross-complementing protein 5 OS=Homo sapiens GN=XRCC5 PE=1 SV=3	sp|P13010	83 kDa	0	1	1	2	1	1	0	2	1	1	2	1	0	1	1	3	1	1	0	4	2	1	2	3	0.668047	0.659377	-1.30536	NS	0.341345	-1.70722	NS	0.613037	-1.31241	NS
466	Glutaredoxin-1 OS=Homo sapiens GN=GLRX PE=1 SV=2	sp|P35754	12 kDa	1	1	1	2	1	1	1	1	1	1	2	1	2	2	4	4	2	1	3	4	1	2	4	3	0.933632	0.849424	1.08474	NS	0.776104	1.12941	NS	0.922625	1.04442	NS
467	60S ribosomal protein L6 OS=Homo sapiens GN=RPL6 PE=1 SV=3	sp|Q02878	33 kDa	1	1	1	0	2	1	1	1	1	1	1	1	3	3	2	0	4	2	3	1	3	1	2	1	0.709767	0.582311	-1.29766	NS	0.806489	1.13513	NS	0.43225	1.46821	NS
468	Peptidyl-prolyl cis-trans isomerase FKBP2 OS=Homo sapiens GN=FKBP2 PE=1 SV=2	sp|P26885	16 kDa	1	2	1	1	1	2	1	1	1	1	1	1	4	5	2	3	2	3	2	1	2	3	2	2	0.461774	0.224707	1.69728	NS	0.30572	1.54162	NS	0.864397	-1.0865	NS
469	60S ribosomal protein L3 OS=Homo sapiens GN=RPL3 PE=1 SV=2	sp|P39023	46 kDa	1	1	1	1	0	1	1	2	1	1	1	1	1	2	3	2	0	5	4	4	3	1	5	2	0.463463	0.187794	-1.79191	NS	0.417428	-1.45424	NS	0.747046	1.18981	NS
470	Acidic leucine-rich nuclear phosphoprotein 32 family member A OS=Homo sapiens GN=ANP32A PE=1 SV=1	sp|P39687	29 kDa	2	1	2	2	2	1	2	2	2	1	1	1	3	2	3	3	4	2	3	4	2	1	1	1	0.131627	0.56385	-1.26665	NS	0.14696	2.12669	NS	0.0495905	2.65827	NS
471	Astrocytic phosphoprotein PEA-15 OS=Homo sapiens GN=PEA15 PE=1 SV=2	sp|Q15121	15 kDa	1	1	1	1	2	1	1	1	1	1	1	1	3	3	3	2	4	3	1	3	2	2	1	2	0.557939	0.927712	-1.03951	NS	0.367163	1.53897	NS	0.329871	1.59234	NS
472	60S ribosomal protein L36a OS=Homo sapiens GN=RPL36A PE=1 SV=2	sp|P83881 (+1)	12 kDa	0	0	1	1	1	1	1	1	1	1	1	1	0	0	1	1	2	1	1	2	1	1	1	1	0.309982	0.117873	-3.27061	NS	0.369414	-2.1256	NS	0.503625	1.53318	NS
473	Histone H2A type 1-B/E OS=Homo sapiens GN=HIST1H2AB PE=1 SV=2	sp|P04908 (+9)	14 kDa	1	0	1	1	1	1	1	1	1	0	1	1	4	0	5	1	4	1	5	3	3	0	5	1	0.612745	0.385674	-1.43883	NS	0.932576	1.03862	NS	0.337388	1.51062	NS
474	F-actin-capping protein subunit beta OS=Homo sapiens GN=CAPZB PE=1 SV=4	sp|P47756	31 kDa	2	2	1	1	3	1	1	1	2	2	1	1	5	2	2	1	7	2	1	1	3	2	2	1	0.765526	0.824474	-1.10186	NS	0.651647	1.23822	NS	0.480019	1.38572	NS
475	Proteasome subunit alpha type-5 OS=Homo sapiens GN=PSMA5 PE=1 SV=3	sp|P28066	26 kDa	1	1	1	2	2	1	1	1	3	1	1	1	3	2	2	4	5	1	2	2	3	2	2	2	0.92706	0.915602	1.04746	NS	0.710489	1.18131	NS	0.791598	1.12905	NS
476	CD59 glycoprotein OS=Homo sapiens GN=CD59 PE=1 SV=1	sp|P13987	14 kDa	2	0	1	2	2	1	2	1	1	2	1	1	4	0	1	3	6	1	2	1	1	2	1	1	0.435796	0.593601	-1.28752	NS	0.478755	1.55084	NS	0.241788	2.03057	NS
477	Cytosolic non-specific dipeptidase OS=Homo sapiens GN=CNDP2 PE=1 SV=2	sp|Q96KP4	53 kDa	1	0	2	2	0	0	0	0	0	0	0	0	1	0	2	2	0	0	0	0	0	0	0	0	0.00706078	0.0422604	9.92294	NS	0.0398742	10.2299	NS	1	1	NS
478	Ubiquitin-conjugating enzyme E2 variant 2 OS=Homo sapiens GN=UBE2V2 PE=1 SV=4	sp|Q15819	16 kDa	1	1	1	1	1	0	1	0	1	1	1	0	9	4	4	8	8	3	3	3	7	4	6	3	0.579046	0.264108	1.41712	NS	0.52065	1.21208	NS	0.668964	-1.15132	NS
479	Ubiquitin-conjugating enzyme E2 D3 OS=Homo sapiens GN=UBE2D3 PE=1 SV=1	sp|P61077 (+1)	17 kDa	0	0	1	0	0	1	0	0	0	1	2	1	0	0	1	0	0	1	0	0	0	2	2	1	0.121255	0.961184	-1.04995	NS	0.106425	-3.83354	NS	0.136098	-3.47716	NS
480	Apolipoprotein A-I OS=Homo sapiens GN=APOA1 PE=1 SV=1	sp|P02647	31 kDa	1	3	2	2	3	0	2	3	2	1	2	1	1	3	4	4	3	0	4	3	4	1	3	2	0.933669	0.85926	1.07894	NS	0.753462	1.14383	NS	0.945098	1.0313	NS
481	Dihydropteridine reductase OS=Homo sapiens GN=QDPR PE=1 SV=2	sp|P09417	26 kDa	2	0	2	1	1	0	1	0	1	2	1	1	4	0	3	2	1	0	1	0	2	3	1	1	0.100179	0.054085	3.55102	NS	0.655319	1.25259	NS	0.0989952	-3.4053	NS
482	Inositol monophosphatase 1 OS=Homo sapiens GN=IMPA1 PE=1 SV=1	sp|P29218	30 kDa	1	2	2	1	2	2	1	2	2	3	1	1	2	3	2	2	2	3	1	3	3	7	1	2	0.604301	0.924696	-1.04564	NS	0.401302	-1.43517	NS	0.422103	-1.41256	NS
483	Presequence protease, mitochondrial OS=Homo sapiens GN=PITRM1 PE=1 SV=2	sp|Q5JRX3	117 kDa	1	0	1	1	2	1	0	0	1	2	1	0	2	0	1	2	3	1	0	0	2	2	2	0	0.837113	0.753326	1.23427	NS	0.726008	-1.23603	NS	0.56267	-1.42229	NS
484	Heme-binding protein 1 OS=Homo sapiens GN=HEBP1 PE=1 SV=1	sp|Q9NRV9	21 kDa	1	0	1	0	1	2	0	0	1	1	1	0	1	0	1	0	1	3	0	0	1	2	2	0	0.473036	0.522943	-1.79901	NS	0.272204	-2.23996	NS	0.797775	-1.17653	NS
485	Importin subunit beta-1 OS=Homo sapiens GN=KPNB1 PE=1 SV=2	sp|Q14974	97 kDa	1	1	1	0	1	1	1	3	2	0	1	0	1	1	2	0	1	1	2	5	2	0	2	0	0.248282	0.231259	-2.3369	NS	0.958236	-1.03556	NS	0.23271	2.2949	NS
486	GTP-binding protein Rheb OS=Homo sapiens GN=RHEB PE=1 SV=1	sp|Q15382	20 kDa	1	1	1	2	1	1	1	1	1	2	1	1	1	1	2	2	2	4	3	3	3	6	5	3	0.0529882	0.111454	-2.16502	NS	0.0232204	-2.92796	NS	0.413126	-1.35875	NS
487	Actin-related protein 2/3 complex subunit 3 OS=Homo sapiens GN=ARPC3 PE=1 SV=3	sp|O15145	21 kDa	2	1	1	0	1	1	0	1	1	1	1	0	2	3	3	0	4	1	0	2	2	1	2	0	0.718778	0.83586	1.14267	NS	0.432119	1.53007	NS	0.553582	1.41136	NS
488	Tubulin alpha-1C chain OS=Homo sapiens GN=TUBA1C PE=1 SV=1	sp|Q9BQE3	50 kDa	1	1	1	1	1	1	1	1	1	1	1	1	60	51	63	57	62	59	58	64	68	52	59	57	0.463925	0.208233	-1.12285	NS	0.550536	-1.05688	NS	0.521804	1.06033	NS
489	Calcium/calmodulin-dependent protein kinase type II subunit delta OS=Homo sapiens GN=CAMK2D PE=1 SV=3	sp|Q13557	56 kDa	1	1	1	1	1	1	1	1	1	1	1	1	4	4	4	2	3	2	2	2	5	3	3	2	0.630184	0.355686	1.47847	NS	0.883522	1.05809	NS	0.423008	-1.41172	NS
490	Cathepsin Z OS=Homo sapiens GN=CTSZ PE=1 SV=1	sp|Q9UBR2	34 kDa	1	1	1	1	1	0	1	1	1	1	1	0	2	2	3	2	3	0	3	2	2	1	3	0	0.75154	0.951008	1.03036	NS	0.482379	1.44349	NS	0.540684	1.38925	NS
491	SH3 domain-binding glutamic acid-rich-like protein 3 OS=Homo sapiens GN=SH3BGRL3 PE=1 SV=1	sp|Q9H299	10 kDa	1	2	1	1	1	2	2	1	1	1	1	1	1	4	2	1	2	2	3	1	1	1	2	1	0.635538	0.902288	-1.06345	NS	0.42046	1.57409	NS	0.35674	1.67874	NS
492	Glycerol-3-phosphate dehydrogenase [NAD+], cytoplasmic OS=Homo sapiens GN=GPD1 PE=1 SV=4	sp|P21695	38 kDa	1	1	1	1	0	1	1	1	1	2	2	2	1	1	3	1	0	1	1	1	1	3	3	2	0.228573	0.400655	1.78627	NS	0.388025	-1.56904	NS	0.0920928	-2.84987	NS
493	Far upstream element-binding protein 2 OS=Homo sapiens GN=KHSRP PE=1 SV=4	sp|Q92945	73 kDa	2	0	2	0	1	0	1	0	0	1	1	0	2	0	2	0	1	0	1	0	0	1	1	0	0.668404	0.534822	1.5646	NS	0.471182	1.74582	NS	0.956372	1.05018	NS
494	3-hydroxyisobutyryl-CoA hydrolase, mitochondrial OS=Homo sapiens GN=HIBCH PE=1 SV=2	sp|Q6NVY1	43 kDa	2	1	1	0	1	0	1	1	3	2	2	0	2	1	2	0	2	0	1	1	4	2	3	0	0.338265	0.806383	1.17867	NS	0.287141	-1.75089	NS	0.17375	-2.1953	NS
495	Non-syndromic hearing impairment protein 5 OS=Homo sapiens GN=DFNA5 PE=1 SV=2	sp|O60443	55 kDa	1	1	1	1	1	1	1	1	1	1	1	1	2	3	5	2	1	2	5	3	2	5	3	3	0.936553	0.953515	-1.02469	NS	0.783955	-1.11608	NS	0.771895	-1.12598	NS
496	tRNA methyltransferase 112 homolog OS=Homo sapiens GN=TRMT112 PE=1 SV=1	sp|Q9UI30	14 kDa	1	0	1	1	2	2	1	1	1	2	3	3	1	0	2	1	2	2	2	1	1	2	3	3	0.333332	0.294105	-1.90636	NS	0.128468	-2.40212	NS	0.676198	-1.23349	NS
497	ATP synthase subunit O, mitochondrial OS=Homo sapiens GN=ATP5O PE=1 SV=1	sp|P48047	23 kDa	1	2	1	0	0	1	1	1	0	0	1	0	2	2	2	0	0	1	1	1	0	0	1	0	0.149513	0.359435	1.88073	NS	0.0731697	4.27049	NS	0.331702	2.47252	NS
498	ATP synthase subunit f, mitochondrial OS=Homo sapiens GN=ATP5J2 PE=1 SV=3	sp|P56134	11 kDa	1	1	1	2	1	1	1	1	1	1	2	0	3	2	1	2	1	1	2	2	1	2	3	0	0.872565	0.6683	1.2596	NS	0.616781	1.3089	NS	0.924326	1.0564	NS
499	60S ribosomal protein L10a OS=Homo sapiens GN=RPL10A PE=1 SV=2	sp|P62906	25 kDa	0	1	0	0	0	0	0	0	1	1	0	0	0	1	0	0	0	0	0	0	2	1	0	0	0.132625	0.607912	1.6842	NS	0.435017	-1.92933	NS	0.162789	-4.02963	NS
500	Eukaryotic translation initiation factor 4 gamma 1 OS=Homo sapiens GN=EIF4G1 PE=1 SV=4	sp|Q04637	175 kDa	0	3	0	1	0	5	0	1	0	1	0	0	0	3	0	1	0	10	0	1	0	1	0	0	0.606252	0.157945	-2.3585	NS	0.231847	2.58556	NS	0.0494708	6.21421	NS
501	Kinesin-1 heavy chain OS=Homo sapiens GN=KIF5B PE=1 SV=1	sp|P33176	110 kDa	2	0	3	1	1	1	1	1	1	1	1	1	2	0	3	2	3	1	2	1	1	1	1	1	0.587063	0.874156	-1.08856	NS	0.417038	1.64875	NS	0.339714	1.79835	NS
502	Lysosomal alpha-mannosidase OS=Homo sapiens GN=MAN2B1 PE=1 SV=3	sp|O00754	114 kDa	0	0	1	1	2	2	2	3	1	3	1	1	0	0	1	1	3	3	2	4	1	4	1	2	0.0136873	0.00831692	-6.4712	0.0249508	0.0660958	-4.09905	NS	0.339023	1.5402	NS	+
503	Radixin OS=Homo sapiens GN=RDX PE=1 SV=1	sp|P35241	69 kDa	0	1	2	2	0	1	2	2	1	0	3	1	12	15	13	13	12	10	15	14	13	8	17	13	0.987135	0.872396	-1.03207	NS	0.999632	1.00009	NS	0.854655	1.03696	NS
504	T-complex protein 1 subunit zeta OS=Homo sapiens GN=CCT6A PE=1 SV=3	sp|P40227	58 kDa	1	0	2	1	0	1	0	0	1	2	0	1	2	0	2	1	0	1	0	0	2	3	0	1	0.131111	0.134767	4.19327	NS	0.776502	-1.20339	NS	0.0699977	-4.28123	NS
505	Polyadenylate-binding protein 1 OS=Homo sapiens GN=PABPC1 PE=1 SV=2	sp|P11940	71 kDa	1	0	2	1	0	2	1	1	0	1	2	0	1	0	4	1	0	2	2	1	0	1	3	0	0.848839	0.940553	1.04625	NS	0.613716	1.38156	NS	0.665106	1.31575	NS
506	Calponin-3 OS=Homo sapiens GN=CNN3 PE=1 SV=1	sp|Q15417	36 kDa	1	1	1	1	1	1	0	0	1	1	0	1	1	1	2	1	2	1	0	0	1	1	0	1	0.751365	0.511884	1.60423	NS	0.50435	1.61697	NS	0.995635	-1.00417	NS
507	Heat shock protein 75 kDa, mitochondrial OS=Homo sapiens GN=TRAP1 PE=1 SV=3	sp|Q12931	80 kDa	0	1	2	2	1	3	2	2	0	0	1	0	10	6	12	9	11	10	12	9	10	11	7	8	0.633994	0.3724	-1.22296	NS	0.986605	-1.00394	NS	0.414277	1.20347	NS
508	General vesicular transport factor p115 OS=Homo sapiens GN=USO1 PE=1 SV=2	sp|O60763	108 kDa	5	0	1	1	3	0	0	0	4	1	1	0	6	0	1	1	3	0	0	0	4	1	1	0	0.471012	0.134591	2.4751	NS	0.595823	1.32994	NS	0.329855	-1.87939	NS
509	NEDD8-conjugating enzyme Ubc12 OS=Homo sapiens GN=UBE2M PE=1 SV=1	sp|P61081	21 kDa	0	0	1	1	1	1	0	1	1	1	1	0	0	0	2	1	2	1	0	1	1	1	1	0	0.87729	0.62701	-1.49146	NS	0.941605	-1.06169	NS	0.692145	1.35111	NS
510	ADP-ribosylation factor-like protein 3 OS=Homo sapiens GN=ARL3 PE=1 SV=2	sp|P36405	20 kDa	1	1	1	1	2	1	0	1	1	1	0	1	2	1	2	2	4	1	0	1	2	1	0	1	0.672234	0.82073	1.13441	NS	0.388158	1.70119	NS	0.560083	1.42543	NS
511	Glia maturation factor beta OS=Homo sapiens GN=GMFB PE=1 SV=2	sp|P60983	17 kDa	1	0	2	2	2	2	1	1	2	0	1	1	1	0	3	2	2	2	1	1	4	0	1	1	0.993769	0.881622	-1.08998	NS	0.922147	-1.05574	NS	0.989227	1.00783	NS
512	Cytosol aminopeptidase OS=Homo sapiens GN=LAP3 PE=1 SV=3	sp|P28838	56 kDa	0	3	3	0	1	0	1	1	0	1	2	1	0	4	3	0	1	0	1	1	0	2	2	1	0.588781	0.506445	1.64951	NS	0.595499	1.34535	NS	0.523136	-1.58336	NS
513	Complement C4-A OS=Homo sapiens GN=C4A PE=1 SV=1	sp|P0C0L4 (+1)	193 kDa	1	1	2	3	0	2	2	1	1	1	1	0	2	1	3	5	0	3	4	1	1	1	1	0	0.114052	0.626815	1.3052	NS	0.0629647	3.46676	NS	0.127472	2.85422	NS
514	Heterogeneous nuclear ribonucleoprotein D0 OS=Homo sapiens GN=HNRNPD PE=1 SV=1	sp|Q14103	38 kDa	2	1	1	1	1	1	1	1	1	1	1	1	2	1	4	2	4	2	3	1	2	3	2	3	0.926416	0.686611	-1.20398	NS	0.743546	-1.16222	NS	0.94731	1.03001	NS
515	Integrin beta-1 OS=Homo sapiens GN=ITGB1 PE=1 SV=2	sp|P05556	88 kDa	1	0	1	1	1	1	3	0	0	0	1	0	1	0	2	1	1	1	5	0	0	0	1	0	0.176972	0.279206	-2.03103	NS	0.244093	2.78807	NS	0.0456886	5.42598	NS
516	RNA-binding protein EWS OS=Homo sapiens GN=EWSR1 PE=1 SV=1	sp|Q01844	68 kDa	1	0	1	1	1	1	1	0	1	1	1	0	2	0	1	3	4	1	2	0	2	3	1	0	0.916113	0.73868	-1.22213	NS	0.976545	-1.02019	NS	0.758598	1.17885	NS
517	Small ubiquitin-related modifier 3 OS=Homo sapiens GN=SUMO3 PE=1 SV=2	sp|P55854 (+2)	12 kDa	0	0	0	1	1	1	0	1	1	1	0	1	0	0	0	1	1	1	0	2	1	3	0	1	0.193477	0.192214	-3.13338	NS	0.133455	-3.64906	NS	0.764101	-1.20964	NS
518	Aminopeptidase B OS=Homo sapiens GN=RNPEP PE=1 SV=2	sp|Q9H4A4	73 kDa	1	1	1	2	2	1	2	1	1	0	0	0	1	1	1	2	3	1	2	1	1	0	0	0	0.070211	0.493161	-1.49019	NS	0.0959505	4.83187	NS	0.0262643	7.12387	NS
519	T-complex protein 1 subunit delta OS=Homo sapiens GN=CCT4 PE=1 SV=4	sp|P50991	58 kDa	1	1	2	0	1	1	1	1	1	2	2	1	2	1	2	0	3	2	1	2	3	3	3	1	0.382272	0.364021	-1.66703	NS	0.181592	-2.03537	NS	0.676762	-1.21808	NS
520	Alpha-1-acid glycoprotein 1 OS=Homo sapiens GN=ORM1 PE=1 SV=1	sp|P02763	24 kDa	1	0	1	1	0	1	2	1	1	1	2	1	2	0	1	1	0	2	3	2	2	2	2	1	0.530004	0.391016	-1.90989	NS	0.337426	-1.80366	NS	0.925001	1.05163	NS
521	Caldesmon OS=Homo sapiens GN=CALD1 PE=1 SV=3	sp|Q05682	93 kDa	1	2	2	1	1	1	2	1	0	1	2	1	1	2	4	2	1	1	4	1	0	1	3	2	0.77542	0.800942	1.13544	NS	0.516492	1.40378	NS	0.687817	1.25012	NS
522	Puromycin-sensitive aminopeptidase OS=Homo sapiens GN=NPEPPS PE=1 SV=2	sp|P55786	103 kDa	1	1	2	1	1	0	2	0	2	1	1	0	2	1	2	1	1	0	2	0	2	1	1	0	0.64507	0.38203	1.82798	NS	0.546649	1.47049	NS	0.761168	-1.24109	NS
523	Protein SET OS=Homo sapiens GN=SET PE=1 SV=3	sp|Q01105	33 kDa	1	1	0	1	2	1	1	1	2	1	0	1	2	2	0	1	3	1	2	2	3	1	0	2	0.630535	0.372843	-1.65143	NS	0.774922	-1.17996	NS	0.583235	1.34296	NS
524	Apoptosis-inducing factor 1, mitochondrial OS=Homo sapiens GN=AIFM1 PE=1 SV=1	sp|O95831	67 kDa	1	0	1	1	1	1	1	1	1	1	1	1	1	0	2	1	2	1	2	2	2	2	1	2	0.529127	0.283231	-1.93401	NS	0.327018	-1.82669	NS	0.963545	1.02474	NS
525	Polypyrimidine tract-binding protein 1 OS=Homo sapiens GN=PTBP1 PE=1 SV=1	sp|P26599	57 kDa	1	0	0	0	1	0	0	0	0	1	0	0	1	0	0	0	1	0	0	0	0	1	0	0	0.999009	0.977741	1.02527	NS	0.978353	1.02751	NS	0.999118	1.00111	NS
526	Annexin A11 OS=Homo sapiens GN=ANXA11 PE=1 SV=1	sp|P50995	54 kDa	2	0	1	1	1	1	2	1	1	1	1	0	3	0	1	4	2	1	2	2	1	1	2	0	0.498793	0.903721	1.06467	NS	0.467663	1.67769	NS	0.327699	1.82479	NS
527	Bifunctional ATP-dependent dihydroxyacetone kinase/FAD-AMP lyase (cyclizing) OS=Homo sapiens GN=DAK PE=1 SV=2	sp|Q3LXA3	59 kDa	2	0	1	1	1	0	1	1	3	1	1	2	4	0	1	2	1	0	1	2	5	1	1	2	0.425924	0.434892	1.58311	NS	0.580737	-1.31963	NS	0.17694	-2.24209	NS
528	Cysteine and glycine-rich protein 1 OS=Homo sapiens GN=CSRP1 PE=1 SV=3	sp|P21291	21 kDa	1	0	3	0	2	0	0	0	1	0	0	0	2	0	3	0	3	0	0	0	1	0	0	0	0.518878	0.566393	1.44393	NS	0.165158	2.89843	NS	0.464608	1.75946	NS
529	Proteasome subunit beta type-4 OS=Homo sapiens GN=PSMB4 PE=1 SV=4	sp|P28070	29 kDa	0	0	0	1	0	0	0	1	0	1	2	0	0	0	0	1	0	0	0	1	0	1	2	0	0.478092	0.957724	-1.04858	NS	0.375209	-2.46347	NS	0.411354	-2.2045	NS
530	Glucosamine 6-phosphate N-acetyltransferase OS=Homo sapiens GN=GNPNAT1 PE=1 SV=1	sp|Q96EK6	21 kDa	1	0	1	2	1	0	0	1	1	1	2	2	4	0	3	3	2	0	0	3	3	3	2	4	0.241604	0.257255	1.79161	NS	0.594772	-1.25534	NS	0.0888817	-2.37472	NS
531	Leucyl-tRNA synthetase, cytoplasmic OS=Homo sapiens GN=LARS PE=1 SV=2	sp|Q9P2J5	134 kDa	0	0	2	1	0	2	3	0	0	0	2	0	0	0	2	1	0	2	3	0	0	0	3	0	0.735433	0.382521	-1.80284	NS	0.901348	-1.09165	NS	0.445796	1.62695	NS
532	Translationally-controlled tumor protein OS=Homo sapiens GN=TPT1 PE=1 SV=1	sp|P13693	20 kDa	1	1	1	1	1	1	0	0	1	1	1	1	2	2	3	2	2	3	0	0	3	1	3	2	0.530523	0.310714	1.74181	NS	0.925175	-1.04531	NS	0.301213	-2.00008	NS
533	60S ribosomal protein L21 OS=Homo sapiens GN=RPL21 PE=1 SV=2	sp|P46778	19 kDa	1	1	1	1	1	1	1	1	1	1	1	1	3	2	2	3	2	2	4	4	3	2	2	2	0.74717	0.53779	-1.30165	NS	0.869575	1.07839	NS	0.463236	1.37964	NS
534	Heme-binding protein 2 OS=Homo sapiens GN=HEBP2 PE=1 SV=1	sp|Q9Y5Z4	23 kDa	3	2	1	0	1	1	0	1	1	2	1	1	3	2	1	0	2	1	0	1	2	4	2	1	0.390069	0.516766	1.51385	NS	0.449028	-1.48489	NS	0.172768	-2.19876	NS
535	T-complex protein 1 subunit eta OS=Homo sapiens GN=CCT7 PE=1 SV=2	sp|Q99832	59 kDa	0	0	1	1	1	0	2	0	1	1	1	1	0	0	1	1	1	0	2	0	2	1	1	1	0.484268	0.571269	-1.59316	NS	0.224011	-2.62669	NS	0.508699	-1.6089	NS
536	Eukaryotic translation initiation factor 1 OS=Homo sapiens GN=EIF1 PE=1 SV=1	sp|P41567	13 kDa	1	0	1	2	2	2	2	1	0	2	2	2	1	0	3	2	3	3	2	2	0	5	2	3	0.454486	0.243241	-1.8097	NS	0.44303	-1.66121	NS	0.935288	1.03699	NS
537	Phosphomevalonate kinase OS=Homo sapiens GN=PMVK PE=1 SV=3	sp|Q15126	22 kDa	1	2	1	0	1	0	1	0	1	3	1	1	2	2	1	0	1	0	1	0	2	4	1	2	0.0977059	0.298121	2.15104	NS	0.289635	-1.78392	NS	0.0555634	-4.38219	NS
538	3-hydroxybutyrate dehydrogenase type 2 OS=Homo sapiens GN=BDH2 PE=1 SV=2	sp|Q9BUT1	27 kDa	1	0	2	1	1	0	0	1	3	2	1	1	1	0	2	2	3	0	0	1	4	2	1	1	0.489164	0.821543	1.15412	NS	0.373206	-1.65328	NS	0.239717	-2.01194	NS
539	Dual specificity protein phosphatase 23 OS=Homo sapiens GN=DUSP23 PE=1 SV=1	sp|Q9BVJ7	17 kDa	2	1	1	1	2	1	1	1	1	1	1	1	3	1	3	3	2	1	1	3	1	1	1	2	0.466158	0.563155	1.32778	NS	0.228675	1.89961	NS	0.541517	1.42619	NS
540	Eukaryotic translation initiation factor 6 OS=Homo sapiens GN=EIF6 PE=1 SV=1	sp|P56537	27 kDa	3	0	1	0	0	0	0	2	2	2	0	0	3	0	1	0	0	0	0	2	2	3	0	0	0.659837	0.540751	1.69597	NS	0.783253	-1.19484	NS	0.357836	-2.14406	NS
541	Ubiquitin-conjugating enzyme E2 K OS=Homo sapiens GN=UBE2K PE=1 SV=3	sp|P61086	22 kDa	0	0	1	1	0	0	0	1	0	1	1	1	0	0	1	1	0	0	0	1	0	2	2	1	0.211823	0.731102	1.36531	NS	0.251498	-2.31961	NS	0.134921	-3.49855	NS
542	Apoptosis regulator BAX OS=Homo sapiens GN=BAX PE=1 SV=1	sp|Q07812	21 kDa	1	1	1	0	2	0	1	1	2	1	1	1	4	1	2	0	3	0	1	1	3	3	2	1	0.590954	0.596364	1.36166	NS	0.609115	-1.29288	NS	0.297034	-1.76809	NS
543	Bifunctional purine biosynthesis protein PURH OS=Homo sapiens GN=ATIC PE=1 SV=3	sp|P31939	65 kDa	2	1	1	0	1	0	0	1	0	1	0	2	2	2	1	0	1	0	0	1	0	1	0	2	0.55241	0.256374	2.47631	NS	0.509651	1.6881	NS	0.683984	-1.39755	NS
544	Seryl-tRNA synthetase, cytoplasmic OS=Homo sapiens GN=SARS PE=1 SV=3	sp|P49591	59 kDa	1	1	1	1	1	1	1	1	1	2	1	1	2	2	3	1	3	3	1	2	3	3	2	3	0.748955	0.73557	-1.17851	NS	0.454169	-1.41315	NS	0.686698	-1.19833	NS
545	T-complex protein 1 subunit epsilon OS=Homo sapiens GN=CCT5 PE=1 SV=1	sp|P48643	60 kDa	2	0	1	0	2	0	1	1	2	2	1	0	5	0	1	0	4	0	1	1	2	3	1	0	0.917517	0.996769	-1.00225	NS	0.837971	-1.15326	NS	0.982451	-1.01406	NS
546	ATP synthase subunit d, mitochondrial OS=Homo sapiens GN=ATP5H PE=1 SV=3	sp|O75947	18 kDa	1	0	1	1	0	1	1	1	0	0	1	1	1	0	1	2	0	1	1	1	0	0	1	1	0.735379	0.808416	1.20296	NS	0.511576	1.66213	NS	0.639659	1.4694	NS
547	Tropomyosin alpha-3 chain OS=Homo sapiens GN=TPM3 PE=1 SV=1	sp|P06753	33 kDa	0	1	0	0	0	2	2	1	0	0	1	0	0	3	0	0	0	3	2	1	0	0	1	0	0.246326	0.311998	-1.92534	NS	0.570588	1.63791	NS	0.0676207	4.61365	NS
548	GrpE protein homolog 1, mitochondrial OS=Homo sapiens GN=GRPEL1 PE=1 SV=2	sp|Q9HAV7	24 kDa	0	2	1	0	1	1	0	0	1	0	1	0	0	3	3	0	2	2	0	0	1	0	1	0	0.501801	0.616081	1.39782	NS	0.257807	2.55107	NS	0.436437	1.82386	NS
549	Keratin, type I cytoskeletal 9 OS=Homo sapiens GN=KRT9 PE=1 SV=3	sp|P35527	62 kDa	1	2	0	3	3	3	1	2	0	0	0	0	1	3	0	4	7	4	1	2	0	0	0	0	0.0021184	0.27181	-1.76797	NS	0.0107833	16.7131	0.0215665	0.00019526	97792	0.000585779	+
550	Chromobox protein homolog 3 OS=Homo sapiens GN=CBX3 PE=1 SV=4	sp|Q13185	21 kDa	2	0	0	0	2	2	0	1	0	2	0	0	2	0	0	0	3	2	0	2	0	2	0	0	0.154115	0.110952	-2.95646	NS	0.973542	1.02894	NS	0.121229	3.01957	NS
551	26S proteasome non-ATPase regulatory subunit 11 OS=Homo sapiens GN=PSMD11 PE=1 SV=3	sp|O00231	47 kDa	1	1	1	1	0	1	1	0	1	1	1	1	1	2	2	1	0	3	3	0	1	3	2	2	0.81636	0.881749	-1.08991	NS	0.560817	-1.36719	NS	0.670997	-1.25669	NS
552	Succinyl-CoA ligase [ADP-forming] subunit beta, mitochondrial OS=Homo sapiens GN=SUCLA2 PE=1 SV=3	sp|Q9P2R7	50 kDa	1	1	2	1	1	1	2	1	1	1	1	1	1	1	3	2	1	2	3	1	1	2	2	3	0.948263	0.838406	-1.11545	NS	0.711342	-1.21099	NS	0.867199	-1.09037	NS
553	Ras-related protein Rap-1b-like protein OS=Homo sapiens PE=2 SV=1	sp|A6NIZ1 (+1)	21 kDa	1	0	1	2	2	1	1	1	1	2	1	1	3	0	1	2	4	1	1	2	3	2	1	2	0.77186	0.54931	-1.38006	NS	0.55637	-1.37191	NS	0.989825	1.0064	NS
554	ES1 protein homolog, mitochondrial OS=Homo sapiens GN=C21orf33 PE=1 SV=3	sp|P30042	28 kDa	0	0	0	1	0	0	0	0	0	1	0	0	0	0	0	1	0	0	0	0	0	1	0	0	0.45807	0.635958	1.61851	NS	0.993948	-1.00762	NS	0.622967	-1.64835	NS
555	Dehydrogenase/reductase SDR family member 4 OS=Homo sapiens GN=DHRS4 PE=1 SV=3	sp|Q9BTZ2	30 kDa	1	1	1	1	2	0	0	1	1	1	1	1	2	2	1	2	3	0	0	1	2	2	1	2	0.636017	0.377736	1.72148	NS	0.971713	-1.01916	NS	0.363745	-1.74812	NS
556	Isovaleryl-CoA dehydrogenase, mitochondrial OS=Homo sapiens GN=IVD PE=1 SV=1	sp|P26440	46 kDa	1	0	0	1	2	0	1	0	2	1	1	1	1	0	0	1	3	0	1	0	3	1	1	1	0.329878	0.43416	-1.83046	NS	0.139471	-3.0704	NS	0.530329	-1.49356	NS
557	Signal recognition particle 9 kDa protein OS=Homo sapiens GN=SRP9 PE=1 SV=2	sp|P49458	10 kDa	1	1	1	1	1	1	1	1	1	1	1	1	2	1	2	2	3	2	1	2	3	2	2	2	0.847503	0.722525	-1.20184	NS	0.56774	-1.33239	NS	0.837159	-1.10499	NS
558	PEST proteolytic signal-containing nuclear protein OS=Homo sapiens GN=PCNP PE=1 SV=2	sp|Q8WW12	19 kDa	0	1	0	1	1	1	1	1	0	1	1	1	0	1	0	2	1	2	1	1	0	3	2	1	0.551601	0.433619	-1.75565	NS	0.319922	-1.90473	NS	0.826272	-1.14194	NS
559	Leucine-rich repeat-containing protein 59 OS=Homo sapiens GN=LRRC59 PE=1 SV=1	sp|Q96AG4	35 kDa	0	1	0	0	0	0	1	1	0	0	0	0	0	1	0	0	0	0	1	1	0	0	0	0	0.242438	0.560966	-1.80542	NS	0.600172	1.70321	NS	0.292253	3.09517	NS
560	Putative RNA-binding protein Luc7-like 2 OS=Homo sapiens GN=LUC7L2 PE=1 SV=2	sp|Q9Y383	47 kDa	1	1	1	1	1	1	1	1	1	1	1	1	2	2	4	2	1	3	3	2	3	3	2	2	0.986506	0.975286	1.01436	NS	0.944317	-1.03176	NS	0.882727	-1.07012	NS
561	Calcineurin-like phosphoesterase domain-containing protein 1 OS=Homo sapiens GN=CPPED1 PE=1 SV=3	sp|Q9BRF8	36 kDa	2	2	2	1	0	1	2	1	2	0	1	2	2	4	2	2	0	2	2	1	2	0	1	2	0.361474	0.235045	1.88468	NS	0.223815	1.95215	NS	0.959431	1.03457	NS
562	Mitochondrial import inner membrane translocase subunit Tim8 A OS=Homo sapiens GN=TIMM8A PE=1 SV=1	sp|O60220	11 kDa	1	2	1	1	1	1	1	1	1	1	1	1	1	2	2	1	2	1	1	1	2	2	2	3	0.545818	0.83618	1.13345	NS	0.39802	-1.55442	NS	0.302265	-1.75736	NS
563	Fructose-bisphosphate aldolase C OS=Homo sapiens GN=ALDOC PE=1 SV=2	sp|P09972	39 kDa	1	1	1	1	2	2	0	1	2	1	1	1	2	1	1	1	2	2	0	2	2	1	1	1	0.908364	0.737769	-1.22452	NS	0.974188	-1.02069	NS	0.751374	1.21106	NS
564	Acyl-coenzyme A thioesterase 2, mitochondrial OS=Homo sapiens GN=ACOT2 PE=1 SV=6	sp|P49753 (+1)	53 kDa	0	0	0	0	0	0	0	0	0	1	1	0	0	0	0	0	0	0	0	0	0	1	1	0	0.110771	1	1	NS	0.302467	-3.02717	NS	0.325552	-2.8808	NS
565	Aldehyde dehydrogenase, dimeric NADP-preferring OS=Homo sapiens GN=ALDH3A1 PE=1 SV=3	sp|P30838	50 kDa	2	1	2	0	2	0	1	1	0	2	0	0	2	3	2	0	3	0	1	1	0	2	0	0	0.247947	0.600524	1.35691	NS	0.0977268	3.07793	NS	0.252114	2.88399	NS
566	Beta-glucuronidase OS=Homo sapiens GN=GUSB PE=1 SV=2	sp|P08236	75 kDa	0	0	1	0	0	0	0	0	0	1	0	0	0	0	1	0	0	0	0	0	0	1	0	0	0.45807	0.656649	1.5729	NS	0.99385	-1.00774	NS	0.622967	-1.64835	NS
567	Delta-aminolevulinic acid dehydratase OS=Homo sapiens GN=ALAD PE=1 SV=1	sp|P13716	36 kDa	1	2	1	1	0	0	1	0	1	2	1	0	1	2	1	1	0	0	1	0	2	3	1	0	0.130941	0.104999	4.66686	NS	0.779688	-1.18436	NS	0.103007	-4.18157	NS
568	T-complex protein 1 subunit beta OS=Homo sapiens GN=CCT2 PE=1 SV=4	sp|P78371	57 kDa	1	1	1	1	1	1	1	1	1	1	1	1	1	2	2	1	2	1	2	2	1	2	2	1	0.915248	0.677956	-1.25994	NS	0.96415	-1.02632	NS	0.728644	1.21261	NS
569	Serine/arginine-rich splicing factor 3 OS=Homo sapiens GN=SRSF3 PE=1 SV=1	sp|P84103	19 kDa	0	0	0	0	0	0	0	0	0	0	1	0	0	0	0	0	0	0	0	0	0	0	1	0	0.332827	1	1	NS	0.594793	-1.71666	NS	0.636232	-1.61789	NS
570	Eukaryotic translation initiation factor 3 subunit B OS=Homo sapiens GN=EIF3B PE=1 SV=3	sp|P55884	92 kDa	2	0	0	1	1	2	0	1	1	1	0	0	3	0	0	1	1	2	0	1	1	2	0	0	0.908333	0.987226	1.01074	NS	0.722141	1.30963	NS	0.710136	1.30194	NS
571	Acetyl-CoA acetyltransferase, cytosolic OS=Homo sapiens GN=ACAT2 PE=1 SV=2	sp|Q9BWD1	41 kDa	0	0	0	1	0	1	0	1	0	2	1	2	0	0	0	3	0	1	0	1	0	2	1	2	0.531292	0.766287	1.25378	NS	0.448676	-1.66768	NS	0.303643	-2.13033	NS
572	Peptidyl-prolyl cis-trans isomerase FKBP3 OS=Homo sapiens GN=FKBP3 PE=1 SV=1	sp|Q00688	25 kDa	2	0	1	2	2	0	0	1	1	1	0	1	4	0	1	3	6	0	0	1	2	1	0	2	0.865668	0.810627	1.12758	NS	0.44107	1.54317	NS	0.648047	1.33578	NS
573	Vacuolar protein sorting-associated protein 35 OS=Homo sapiens GN=VPS35 PE=1 SV=2	sp|Q96QK1	92 kDa	0	1	1	0	0	1	1	1	0	0	2	0	0	1	3	0	0	1	1	1	0	0	2	0	0.743043	0.85606	1.13794	NS	0.532816	1.56695	NS	0.622543	1.49865	NS
574	60S ribosomal protein L37a OS=Homo sapiens GN=RPL37A PE=1 SV=2	sp|P61513	10 kDa	1	1	1	1	1	1	1	1	1	1	1	0	3	2	1	3	1	2	2	2	1	2	1	0	0.393381	0.69586	1.21735	NS	0.165833	2.22755	NS	0.327129	1.82591	NS
575	Alcohol dehydrogenase 1A OS=Homo sapiens GN=ADH1A PE=1 SV=2	sp|P07327	40 kDa	1	0	0	1	1	1	0	1	1	1	1	1	33	19	31	32	19	18	14	17	35	29	34	25	0.000771417	0.0123394	1.58956	0.0246788	0.425432	-1.109	NS	0.00397951	-1.75576	0.0119385	+
576	Septin-7 OS=Homo sapiens GN=SEPT7 PE=1 SV=2	sp|Q16181	51 kDa	1	1	1	2	1	1	0	1	0	1	0	2	2	1	2	2	1	1	0	1	0	1	0	2	0.35967	0.230901	2.21252	NS	0.226742	2.22661	NS	0.991687	1.00791	NS
577	UTP--glucose-1-phosphate uridylyltransferase OS=Homo sapiens GN=UGP2 PE=1 SV=5	sp|Q16851	57 kDa	2	2	2	1	1	0	0	0	1	1	1	0	3	2	2	1	1	0	0	0	1	1	1	0	0.046867	0.0180478	7.81773	NS	0.128678	2.64211	NS	0.374084	-2.29582	NS
578	Leucine-rich repeat flightless-interacting protein 1 OS=Homo sapiens GN=LRRFIP1 PE=1 SV=2	sp|Q32MZ4	89 kDa	0	2	2	1	0	1	2	1	0	1	1	2	0	2	2	1	0	2	2	1	0	1	2	2	0.995056	0.878171	-1.09705	NS	0.932829	-1.0522	NS	0.925548	1.05799	NS
579	Sialic acid synthase OS=Homo sapiens GN=NANS PE=1 SV=2	sp|Q9NR45	40 kDa	2	0	1	0	1	0	1	1	3	1	1	0	4	0	2	0	3	0	1	1	5	1	2	0	0.822799	0.815726	1.14464	NS	0.588823	-1.3238	NS	0.409819	-1.59009	NS
580	Heterogeneous nuclear ribonucleoproteins A2/B1 OS=Homo sapiens GN=HNRNPA2B1 PE=1 SV=2	sp|P22626	37 kDa	0	1	0	1	0	1	1	0	1	0	1	1	0	1	0	1	0	1	2	0	1	0	2	2	0.485701	0.607587	-1.52587	NS	0.225519	-2.67914	NS	0.5318	-1.56853	NS
581	14 kDa phosphohistidine phosphatase OS=Homo sapiens GN=PHPT1 PE=1 SV=1	sp|Q9NRX4	14 kDa	2	1	3	0	1	1	1	0	1	1	1	0	3	2	4	0	1	1	2	0	1	1	2	0	0.298582	0.223774	1.96588	NS	0.191678	2.06097	NS	0.935002	1.05591	NS
582	Cofilin-2 OS=Homo sapiens GN=CFL2 PE=1 SV=1	sp|Q9Y281	19 kDa	1	1	0	1	1	1	1	1	1	1	1	0	24	18	18	19	20	17	22	15	22	19	21	14	0.999434	0.976289	1.00483	NS	0.941722	1.01183	NS	0.962786	1.00765	NS
583	Calmodulin OS=Homo sapiens GN=CALM1 PE=1 SV=2	sp|P62158	17 kDa	0	0	0	0	1	1	0	1	0	2	0	0	0	0	0	0	2	1	0	1	0	4	0	0	0.0868025	0.0592845	-8.93056	NS	0.21531	-3.49238	NS	0.692447	1.36461	NS
584	Coatomer subunit beta OS=Homo sapiens GN=COPB1 PE=1 SV=3	sp|P53618	107 kDa	1	1	1	0	2	0	2	0	1	1	2	0	1	1	2	0	2	0	2	0	2	1	2	0	0.922836	0.904821	-1.08321	NS	0.724245	-1.25086	NS	0.795611	-1.17869	NS
585	Protein transport protein Sec23A OS=Homo sapiens GN=SEC23A PE=1 SV=2	sp|Q15436	86 kDa	0	1	1	1	0	0	0	0	0	0	1	0	0	1	1	1	0	0	0	0	0	0	1	0	0.128537	0.128685	6.49983	NS	0.395532	2.21614	NS	0.636232	-1.61789	NS
586	Coiled-coil domain-containing protein 58 OS=Homo sapiens GN=CCDC58 PE=1 SV=1	sp|Q4VC31	17 kDa	1	1	1	1	1	1	1	0	1	1	1	1	3	1	2	2	2	1	2	0	2	1	1	3	0.760937	0.46605	1.50874	NS	0.861237	1.09468	NS	0.591673	-1.36635	NS
587	Calnexin OS=Homo sapiens GN=CANX PE=1 SV=2	sp|P27824	68 kDa	1	0	0	1	1	0	1	0	1	1	1	0	2	0	0	1	3	0	2	0	1	1	1	0	0.66696	0.473324	-1.62381	NS	0.986996	-1.01341	NS	0.477382	1.61569	NS
588	Platelet-activating factor acetylhydrolase IB subunit beta OS=Homo sapiens GN=PAFAH1B2 PE=1 SV=1	sp|P68402	26 kDa	1	0	0	0	1	1	0	1	1	1	1	0	2	0	0	0	1	2	0	1	3	3	2	0	0.130613	0.463544	-1.76222	NS	0.0766795	-3.36222	NS	0.261536	-1.95088	NS
589	Protein transport protein Sec24A OS=Homo sapiens GN=SEC24A PE=1 SV=2	sp|O95486	120 kDa	0	1	1	1	0	1	1	1	0	1	0	1	0	3	1	1	0	1	2	2	0	1	0	1	0.432342	0.892235	-1.08528	NS	0.282845	2.20209	NS	0.257361	2.29519	NS
590	Guanidinoacetate N-methyltransferase OS=Homo sapiens GN=GAMT PE=1 SV=1	sp|Q14353	26 kDa	0	0	2	0	2	1	1	0	0	0	0	0	0	0	3	0	2	1	1	0	0	0	0	0	0.0781336	0.616783	-1.49641	NS	0.255866	2.83191	NS	0.0565479	9.16689	NS
591	Lon protease homolog, mitochondrial OS=Homo sapiens GN=LONP1 PE=1 SV=2	sp|P36776	106 kDa	2	0	0	0	1	0	0	1	0	1	0	1	2	0	0	0	2	0	0	1	0	1	0	1	0.843639	0.723301	-1.30894	NS	0.896024	-1.12867	NS	0.687044	1.39281	NS
592	Xaa-Pro dipeptidase OS=Homo sapiens GN=PEPD PE=1 SV=3	sp|P12955	55 kDa	1	2	1	1	1	1	1	1	1	2	1	0	1	3	3	2	2	2	1	1	1	3	2	0	0.725447	0.507853	1.41409	NS	0.456193	1.47591	NS	0.946546	1.03949	NS
593	Heterogeneous nuclear ribonucleoprotein A1 OS=Homo sapiens GN=HNRNPA1 PE=1 SV=5	sp|P09651	39 kDa	1	1	2	4	0	0	1	1	1	0	1	2	1	2	2	4	0	0	1	3	2	0	1	2	0.3832	0.224016	2.0246	NS	0.332065	1.70031	NS	0.772104	-1.20169	NS
594	Calpain-2 catalytic subunit OS=Homo sapiens GN=CAPN2 PE=1 SV=6	sp|P17655	80 kDa	0	1	2	1	0	1	2	1	0	0	2	0	0	1	3	2	0	1	2	1	0	0	2	0	0.374534	0.698825	1.26642	NS	0.215657	2.39945	NS	0.389522	1.94161	NS
595	Procollagen-lysine,2-oxoglutarate 5-dioxygenase 2 OS=Homo sapiens GN=PLOD2 PE=1 SV=2	sp|O00469	85 kDa	1	0	1	0	1	1	1	0	2	1	1	1	1	0	2	0	2	1	2	0	2	2	3	1	0.282572	0.429354	-1.70601	NS	0.108413	-2.78558	NS	0.449181	-1.5314	NS
596	Ras-related protein Rab-5C OS=Homo sapiens GN=RAB5C PE=1 SV=2	sp|P51148	23 kDa	0	0	1	0	1	1	0	1	1	1	1	1	0	0	2	0	2	1	0	1	2	3	1	2	0.126052	0.327675	-2.52737	NS	0.0559405	-4.39358	NS	0.251983	-1.97684	NS
597	Abhydrolase domain-containing protein 10, mitochondrial OS=Homo sapiens GN=ABHD10 PE=1 SV=1	sp|Q9NUJ1	34 kDa	0	0	0	0	1	1	0	1	0	1	0	0	0	0	0	0	1	1	0	1	0	1	0	0	0.106427	0.110671	-7.03829	NS	0.630269	-1.63146	NS	0.358391	2.35768	NS
598	ADP-ribosylation factor 5 OS=Homo sapiens GN=ARF5 PE=1 SV=2	sp|P84085	21 kDa	1	0	1	0	1	1	0	1	0	1	0	0	14	9	12	10	17	16	8	10	14	18	13	2	0.722017	0.409989	-1.18368	NS	0.967517	-1.01161	NS	0.584636	1.11687	NS
599	60S ribosomal protein L8 OS=Homo sapiens GN=RPL8 PE=1 SV=2	sp|P62917	28 kDa	1	0	2	2	0	1	1	1	1	2	1	1	2	0	2	4	0	1	1	1	3	3	1	2	0.200936	0.179212	2.411	NS	0.745067	-1.17113	NS	0.0873269	-2.9269	NS
600	Mitochondrial import inner membrane translocase subunit Tim13 OS=Homo sapiens GN=TIMM13 PE=1 SV=1	sp|Q9Y5L4	11 kDa	1	0	1	1	1	1	1	1	1	1	1	1	2	0	4	3	2	3	1	1	1	2	1	3	0.895146	0.772724	1.17529	NS	0.710848	1.20488	NS	0.962628	1.02537	NS
601	Adrenodoxin, mitochondrial OS=Homo sapiens GN=FDX1 PE=1 SV=1	sp|P10109	19 kDa	1	1	1	0	0	0	0	0	0	2	1	1	1	1	1	0	0	0	0	0	0	2	1	1	0.0598622	0.118233	6.8067	NS	0.694942	-1.34752	NS	0.0632454	-8.63431	NS
602	Ras-related protein R-Ras2 OS=Homo sapiens GN=RRAS2 PE=1 SV=1	sp|P62070	23 kDa	1	1	1	1	1	1	1	1	1	1	1	1	1	2	2	2	1	2	2	2	2	2	2	1	0.993084	0.880077	-1.08416	NS	0.956799	-1.02941	NS	0.942008	1.03967	NS
603	Bifunctional protein NCOAT OS=Homo sapiens GN=MGEA5 PE=1 SV=2	sp|O60502	103 kDa	0	1	2	1	0	1	0	0	0	0	1	0	0	1	3	1	0	1	0	0	0	0	2	0	0.283864	0.157461	3.31001	NS	0.333473	2.03906	NS	0.699875	-1.41738	NS
604	Actin, alpha cardiac muscle 1 OS=Homo sapiens GN=ACTC1 PE=1 SV=1	sp|P68032	42 kDa	0	1	1	0	1	1	0	0	0	0	1	0	24	14	22	17	29	15	16	21	28	17	17	11	0.668893	0.499181	-1.11377	NS	0.869523	1.02722	NS	0.439579	1.13282	NS
605	Glycogen phosphorylase, liver form OS=Homo sapiens GN=PYGL PE=1 SV=4	sp|P06737	97 kDa	2	0	1	0	0	0	0	0	1	1	1	0	4	0	1	0	0	0	0	0	1	1	1	0	0.0731001	0.091241	6.03207	NS	0.515303	1.56596	NS	0.118239	-6.7941	NS
606	Glyoxalase domain-containing protein 4 OS=Homo sapiens GN=GLOD4 PE=1 SV=1	sp|Q9HC38	35 kDa	1	1	1	0	0	1	0	0	1	1	2	0	1	1	1	0	0	1	0	0	1	1	3	0	0.249695	0.37427	2.29695	NS	0.476683	-1.61711	NS	0.149858	-3.46188	NS
607	ATP synthase subunit g, mitochondrial OS=Homo sapiens GN=ATP5L PE=1 SV=3	sp|O75964	11 kDa	1	1	1	1	0	1	2	1	0	0	1	1	1	1	2	1	0	1	2	1	0	0	1	1	0.520477	0.871669	1.11447	NS	0.286823	2.33891	NS	0.401859	1.90916	NS
608	Exportin-1 OS=Homo sapiens GN=XPO1 PE=1 SV=1	sp|O14980	123 kDa	1	0	2	0	1	0	1	1	0	1	1	0	1	0	2	0	1	0	1	1	0	1	1	0	0.876416	0.894179	-1.10604	NS	0.718701	1.34527	NS	0.614283	1.57657	NS
609	NudC domain-containing protein 2 OS=Homo sapiens GN=NUDCD2 PE=1 SV=1	sp|Q8WVJ2	18 kDa	1	1	1	1	1	1	1	1	1	1	1	1	2	2	1	1	2	1	1	2	2	2	2	1	0.942758	0.947797	-1.03859	NS	0.765359	-1.1805	NS	0.817717	-1.13669	NS
610	Uncharacterized protein C11orf73 OS=Homo sapiens GN=C11orf73 PE=1 SV=2	sp|Q53FT3	22 kDa	0	1	1	1	1	1	1	1	1	1	1	1	0	2	3	1	2	3	1	2	1	2	2	2	0.807774	0.505587	-1.43063	NS	0.721495	-1.2192	NS	0.749623	1.17942	NS
611	Vacuolar protein sorting-associated protein 29 OS=Homo sapiens GN=VPS29 PE=1 SV=1	sp|Q9UBQ0	21 kDa	1	0	0	2	0	0	0	0	0	1	1	1	2	0	0	2	0	0	0	0	0	1	1	2	0.0466112	0.103582	4.91631	NS	0.936336	-1.05816	NS	0.0626221	-8.70844	NS
612	Keratin, type II cytoskeletal 2 epidermal OS=Homo sapiens GN=KRT2 PE=1 SV=2	sp|P35908	65 kDa	0	2	0	0	2	0	0	2	0	0	2	2	4	8	5	5	11	9	5	8	4	4	14	14	0.307407	0.101081	-1.56514	NS	0.326168	-1.52425	NS	0.935948	1.03103	NS
613	Probable ATP-dependent RNA helicase DDX17 OS=Homo sapiens GN=DDX17 PE=1 SV=1	sp|Q92841	72 kDa	0	0	1	1	0	1	2	1	0	0	1	0	0	0	3	2	0	2	2	1	0	0	1	0	0.185103	0.826238	-1.14183	NS	0.184746	2.75002	NS	0.100562	3.91377	NS
614	Deoxyribonucleoside 5'-monophosphate N-glycosidase OS=Homo sapiens GN=RCL PE=1 SV=1	sp|O43598	19 kDa	1	1	2	1	1	1	2	0	1	2	2	1	1	2	3	2	1	2	3	0	2	2	2	1	0.916185	0.722932	1.21066	NS	0.848424	1.10399	NS	0.852365	-1.10902	NS
615	Ubiquitin-associated protein 2-like OS=Homo sapiens GN=UBAP2L PE=1 SV=2	sp|Q14157	115 kDa	0	0	2	0	0	0	2	1	0	0	2	0	0	0	3	0	0	0	4	1	0	0	2	0	0.705769	0.359843	-1.7938	NS	0.801857	1.19527	NS	0.25869	2.16848	NS
616	E3 ubiquitin/ISG15 ligase TRIM25 OS=Homo sapiens GN=TRIM25 PE=1 SV=2	sp|Q14258	71 kDa	0	0	1	0	1	1	1	1	1	1	1	0	0	0	2	0	2	3	1	1	1	2	1	0	0.192092	0.0811914	-4.16661	NS	0.428793	-1.84265	NS	0.335937	1.8064	NS
617	Protein NipSnap homolog 1 OS=Homo sapiens GN=NIPSNAP1 PE=1 SV=1	sp|Q9BPW8	33 kDa	0	0	1	1	0	0	0	0	1	1	1	0	0	0	1	1	0	0	0	0	1	1	1	0	0.12629	0.348491	2.75131	NS	0.614924	-1.57558	NS	0.118239	-6.7941	NS
618	Methionine adenosyltransferase 2 subunit beta OS=Homo sapiens GN=MAT2B PE=1 SV=1	sp|Q9NZL9	38 kDa	2	1	0	0	0	0	1	0	1	0	0	0	3	1	0	0	0	0	1	0	1	0	0	0	0.438389	0.316327	2.4813	NS	0.235886	2.56401	NS	0.984017	1.02025	NS
619	Transmembrane emp24 domain-containing protein 9 OS=Homo sapiens GN=TMED9 PE=1 SV=2	sp|Q9BVK6	27 kDa	1	1	1	1	1	1	1	0	1	1	1	1	2	2	1	1	1	2	2	0	2	1	2	1	0.965595	0.81733	1.15017	NS	0.972883	-1.01984	NS	0.820284	-1.14729	NS
620	Signal recognition particle 72 kDa protein OS=Homo sapiens GN=SRP72 PE=1 SV=3	sp|O76094	75 kDa	1	1	1	1	1	1	0	0	1	1	1	1	3	2	1	2	1	3	0	0	3	3	2	1	0.37658	0.244025	2.00047	NS	0.795519	-1.1342	NS	0.174593	-2.19165	NS
621	Glucokinase regulatory protein OS=Homo sapiens GN=GCKR PE=1 SV=6	sp|Q14397	69 kDa	1	1	0	1	0	1	0	0	1	1	0	1	1	1	0	1	0	1	0	0	1	3	0	3	0.092401	0.360931	2.3481	NS	0.21775	-2.16082	NS	0.050559	-4.92194	NS
622	Histone H2B type 1-N OS=Homo sapiens GN=HIST1H2BN PE=1 SV=3	sp|Q99877 (+1)	14 kDa	1	1	1	1	1	0	0	0	1	0	1	0	1	1	3	1	5	0	0	0	3	0	4	0	0.598478	0.438721	1.86667	NS	0.70178	-1.23715	NS	0.536189	-1.51322	NS
623	Actin-related protein 2/3 complex subunit 5 OS=Homo sapiens GN=ARPC5 PE=1 SV=3	sp|O15511	16 kDa	0	0	0	0	1	1	0	1	1	0	1	0	0	0	0	0	2	2	0	1	1	0	1	0	0.0260472	0.0354153	-10.8549	NS	0.295359	-3.074	NS	0.242044	2.53447	NS
624	40S ribosomal protein S30 OS=Homo sapiens GN=FAU PE=1 SV=1	sp|P62861	7 kDa	0	0	1	0	0	0	0	0	0	0	0	0	0	0	1	0	0	0	0	0	0	0	0	0	0.344071	0.656649	1.5729	NS	0.635676	1.61915	NS	1	1	NS
625	Transmembrane emp24 domain-containing protein 10 OS=Homo sapiens GN=TMED10 PE=1 SV=2	sp|P49755	25 kDa	2	0	1	1	1	1	0	1	0	2	0	1	2	0	1	1	2	2	0	1	0	3	0	1	0.895257	0.720724	-1.27045	NS	0.87058	1.13898	NS	0.73413	1.2403	NS
626	Biliverdin reductase A OS=Homo sapiens GN=BLVRA PE=1 SV=2	sp|P53004	33 kDa	1	0	1	0	1	0	0	0	0	1	0	0	2	0	1	0	1	0	0	0	0	1	0	0	0.510775	0.414741	1.98731	NS	0.389959	2.34197	NS	0.999118	1.00111	NS
627	Plastin-3 OS=Homo sapiens GN=PLS3 PE=1 SV=4	sp|P13797	71 kDa	0	0	0	0	0	1	0	0	0	1	0	0	0	0	0	0	0	1	0	0	0	1	0	0	0.430138	0.622503	-1.64943	NS	0.630269	-1.63146	NS	0.984173	1.01791	NS
628	Voltage-dependent anion-selective channel protein 1 OS=Homo sapiens GN=VDAC1 PE=1 SV=2	sp|P21796	31 kDa	0	0	1	1	2	0	1	0	0	1	1	0	0	0	1	1	3	0	1	0	0	1	1	0	0.592175	0.466012	-1.91177	NS	0.952868	-1.05434	NS	0.512287	1.84408	NS
629	Pyruvate dehydrogenase E1 component subunit alpha, somatic form, mitochondrial OS=Homo sapiens GN=PDHA1 PE=1 SV=3	sp|P08559	43 kDa	1	0	0	1	1	1	0	0	1	1	0	1	2	0	0	2	1	1	0	0	2	1	0	1	0.687573	0.4471	1.79942	NS	0.976959	-1.01945	NS	0.443219	-1.80777	NS
630	ATP synthase subunit b, mitochondrial OS=Homo sapiens GN=ATP5F1 PE=1 SV=2	sp|P24539	29 kDa	0	1	2	1	1	0	1	0	1	0	1	0	0	1	3	1	1	0	1	0	1	0	2	0	0.553912	0.328868	2.18597	NS	0.543709	1.54865	NS	0.744468	-1.28139	NS
631	ADP-ribosylation factor 6 OS=Homo sapiens GN=ARF6 PE=1 SV=2	sp|P62330	20 kDa	1	1	0	1	1	1	0	0	0	2	0	1	2	1	0	1	1	1	0	0	0	2	0	1	0.757552	0.429449	1.84053	NS	0.713831	1.29759	NS	0.696653	-1.37804	NS
632	Dynein light chain 1, cytoplasmic OS=Homo sapiens GN=DYNLL1 PE=1 SV=1	sp|P63167 (+1)	10 kDa	0	0	0	0	1	0	1	1	0	0	0	1	0	0	0	0	1	0	1	2	0	0	0	1	0.0448563	0.0508441	-9.81526	NS	0.594879	-1.71644	NS	0.2039	3.04544	NS
633	Coiled-coil-helix-coiled-coil-helix domain-containing protein 2, mitochondrial OS=Homo sapiens GN=CHCHD2 PE=1 SV=1	sp|Q9Y6H1	16 kDa	2	1	0	0	1	1	1	1	0	2	1	1	2	1	0	0	1	1	1	1	0	3	1	1	0.74957	0.692808	-1.35064	NS	0.538759	-1.63892	NS	0.787022	-1.19819	NS
634	Ubiquitin thioesterase OTUB1 OS=Homo sapiens GN=OTUB1 PE=1 SV=2	sp|Q96FW1	31 kDa	0	2	3	0	0	1	2	1	1	1	1	0	0	2	3	0	0	1	2	2	1	2	1	0	0.927084	0.845132	-1.12529	NS	0.763517	1.21043	NS	0.681782	1.31547	NS
635	Tensin-3 OS=Homo sapiens GN=TNS3 PE=1 SV=2	sp|Q68CZ2	155 kDa	1	0	1	2	0	0	1	1	1	0	1	1	1	0	3	2	0	0	2	2	1	0	1	1	0.629981	0.714535	1.25019	NS	0.403491	1.71998	NS	0.680435	1.33966	NS
636	Gamma-glutamyl hydrolase OS=Homo sapiens GN=GGH PE=1 SV=2	sp|Q92820	36 kDa	0	1	1	1	1	1	1	0	0	0	0	0	0	1	1	1	1	1	3	0	0	0	0	0	0.0296624	0.381942	-1.87432	NS	0.119346	6.76517	NS	0.0351959	11.7094	NS
637	Hsc70-interacting protein OS=Homo sapiens GN=ST13 PE=1 SV=2	sp|P50502	41 kDa	1	1	1	0	0	1	1	2	0	2	2	1	1	1	1	0	0	1	1	3	0	3	2	3	0.286275	0.502101	-1.81044	NS	0.148797	-2.75458	NS	0.464256	-1.48618	NS
638	Peptidyl-prolyl cis-trans isomerase NIMA-interacting 4 OS=Homo sapiens GN=PIN4 PE=1 SV=1	sp|Q9Y237	14 kDa	1	1	1	1	1	1	1	1	1	1	0	1	2	1	2	2	2	1	2	2	1	2	0	3	0.944564	0.884439	-1.08096	NS	0.83385	1.12376	NS	0.753387	1.19074	NS
639	Palladin OS=Homo sapiens GN=PALLD PE=1 SV=3	sp|Q8WX93	151 kDa	0	0	1	0	1	0	0	0	1	0	1	0	0	0	1	0	1	0	0	0	1	0	1	0	0.788142	0.965307	-1.04454	NS	0.619853	-1.5654	NS	0.659969	-1.48849	NS
640	Reticulocalbin-1 OS=Homo sapiens GN=RCN1 PE=1 SV=1	sp|Q15293	39 kDa	0	1	1	1	0	1	1	0	1	1	1	1	0	1	4	1	0	1	2	0	1	1	1	2	0.648154	0.465582	1.60845	NS	0.848882	1.12222	NS	0.52313	-1.58338	NS
641	ERO1-like protein alpha OS=Homo sapiens GN=ERO1L PE=1 SV=2	sp|Q96HE7	54 kDa	0	1	1	1	0	1	0	1	0	1	0	1	0	2	3	2	0	2	0	2	0	1	0	1	0.251775	0.467833	1.5333	NS	0.12094	2.87623	NS	0.462081	1.69605	NS
642	60S ribosomal protein L19 OS=Homo sapiens GN=RPL19 PE=1 SV=1	sp|P84098	23 kDa	1	0	1	1	0	1	1	0	1	1	1	1	2	0	2	2	0	1	3	0	4	2	2	2	0.26557	0.564167	1.54209	NS	0.278342	-1.73467	NS	0.142839	-2.73083	NS
643	Voltage-dependent L-type calcium channel subunit alpha-1S OS=Homo sapiens GN=CACNA1S PE=1 SV=4	sp|Q13698	212 kDa	0	0	0	0	0	0	1	0	0	0	0	0	0	0	0	0	0	0	1	0	0	0	0	0	0.323091	0.574011	-1.77065	NS	1	1	NS	0.594241	1.71806	NS
644	Ubiquitin carboxyl-terminal hydrolase 14 OS=Homo sapiens GN=USP14 PE=1 SV=3	sp|P54578	56 kDa	1	0	1	0	0	0	1	0	1	1	0	0	1	0	2	0	0	0	2	0	2	2	0	0	0.734679	0.831619	1.17609	NS	0.725939	-1.28522	NS	0.495068	-1.78742	NS
645	Caprin-1 OS=Homo sapiens GN=CAPRIN1 PE=1 SV=2	sp|Q14444	78 kDa	0	0	0	0	0	1	1	1	0	1	0	1	0	0	0	0	0	2	1	1	0	1	0	1	0.0554101	0.0524665	-9.54903	NS	0.302525	-3.02678	NS	0.418113	1.86785	NS
646	Heterogeneous nuclear ribonucleoprotein H OS=Homo sapiens GN=HNRNPH1 PE=1 SV=4	sp|P31943	49 kDa	1	1	1	2	0	1	2	0	1	0	1	1	2	1	1	2	0	1	3	0	1	0	1	1	0.627596	0.496674	1.64791	NS	0.347465	1.90865	NS	0.66995	1.42986	NS
647	Proteasome subunit alpha type-3 OS=Homo sapiens GN=PSMA3 PE=1 SV=2	sp|P25788	28 kDa	1	1	0	1	1	1	1	0	1	1	0	1	1	1	0	2	1	1	1	0	1	2	0	1	0.936369	0.742043	1.28479	NS	0.993877	-1.00513	NS	0.729615	-1.30056	NS
648	Chloride intracellular channel protein 4 OS=Homo sapiens GN=CLIC4 PE=1 SV=4	sp|Q9Y696	29 kDa	1	1	1	1	2	1	1	0	1	1	0	0	2	2	2	2	2	1	1	0	3	1	0	0	0.440557	0.277301	1.91175	NS	0.248891	1.98621	NS	0.998787	1.00102	NS
649	Cytochrome P450 3A4 OS=Homo sapiens GN=CYP3A4 PE=1 SV=4	sp|P08684	57 kDa	0	1	0	0	0	0	0	1	0	1	0	0	0	1	0	0	0	0	0	1	0	1	0	0	0.999009	0.984684	-1.01939	NS	0.969299	1.03504	NS	0.990731	1.01169	NS
650	Ribosome-binding protein 1 OS=Homo sapiens GN=RRBP1 PE=1 SV=4	sp|Q9P2E9	152 kDa	0	2	1	1	0	0	1	2	0	0	1	2	0	3	2	2	0	0	1	3	0	0	1	2	0.505796	0.482046	1.51683	NS	0.255107	2.03967	NS	0.707278	1.28549	NS
651	Galactokinase OS=Homo sapiens GN=GALK1 PE=1 SV=1	sp|P51570	42 kDa	1	0	0	0	1	1	0	0	1	1	0	2	1	0	0	0	3	1	0	0	1	1	0	3	0.264428	0.271997	-2.39842	NS	0.138938	-3.78941	NS	0.724894	-1.2781	NS
652	Glutaredoxin-related protein 5, mitochondrial OS=Homo sapiens GN=GLRX5 PE=1 SV=2	sp|Q86SX6	17 kDa	0	1	1	1	1	0	1	2	1	1	1	1	0	1	3	1	2	0	2	2	1	2	1	3	0.813112	0.610587	-1.36082	NS	0.500715	-1.47938	NS	0.817697	-1.1367	NS
653	Lupus La protein OS=Homo sapiens GN=SSB PE=1 SV=2	sp|P05455	47 kDa	2	1	2	0	2	0	0	1	1	0	0	0	4	1	2	0	3	0	0	1	2	0	0	0	0.3412	0.370785	1.73543	NS	0.106051	2.99892	NS	0.498934	1.62608	NS
654	Eukaryotic translation initiation factor 4H OS=Homo sapiens GN=EIF4H PE=1 SV=5	sp|Q15056	27 kDa	0	1	1	1	0	1	1	0	0	0	1	0	0	1	2	1	0	1	1	0	0	0	1	0	0.393568	0.533302	1.62137	NS	0.238854	2.81962	NS	0.608413	1.58835	NS
655	Adenosine kinase OS=Homo sapiens GN=ADK PE=1 SV=2	sp|P55263	41 kDa	0	1	0	1	1	2	0	0	0	1	1	0	0	2	0	1	1	2	0	0	0	2	1	0	0.997031	0.983293	1.01596	NS	0.983261	1.016	NS	0.961167	1.0375	NS
656	High mobility group protein B1 OS=Homo sapiens GN=HMGB1 PE=1 SV=3	sp|P09429	25 kDa	1	0	1	1	1	1	1	0	1	1	0	0	1	0	1	1	4	1	3	0	2	2	0	0	0.238561	0.119701	-2.85788	NS	0.705642	-1.33272	NS	0.25525	1.92737	NS
657	Histone H4 OS=Homo sapiens GN=HIST1H4A PE=1 SV=2	sp|P62805	11 kDa	2	1	1	1	0	0	0	1	0	0	1	0	3	1	1	1	0	0	0	1	0	0	1	0	0.0656576	0.0689338	5.81939	NS	0.0668837	5.84667	NS	0.975632	1.03103	NS
658	Nuclear transport factor 2 OS=Homo sapiens GN=NUTF2 PE=1 SV=1	sp|P61970	14 kDa	0	0	1	1	0	0	2	0	0	0	1	1	0	0	2	1	0	0	2	0	0	0	2	2	0.737814	0.858537	1.1456	NS	0.638429	-1.36905	NS	0.531309	-1.56933	NS
659	Protein S100-A13 OS=Homo sapiens GN=S100A13 PE=1 SV=1	sp|Q99584	11 kDa	0	0	0	1	1	1	0	1	1	0	0	1	0	0	0	1	1	1	0	2	1	0	0	1	0.335844	0.192214	-3.13338	NS	0.62001	-1.56508	NS	0.449761	1.79269	NS
660	Carnitine O-palmitoyltransferase 1, liver isoform OS=Homo sapiens GN=CPT1A PE=1 SV=2	sp|P50416	88 kDa	0	0	0	0	0	1	0	1	1	1	1	0	0	0	0	0	0	1	0	2	1	1	4	0	0.0416088	0.153813	-4.165	NS	0.0257218	-13.721	NS	0.465998	-1.78036	NS
661	Early endosome antigen 1 OS=Homo sapiens GN=EEA1 PE=1 SV=2	sp|Q15075	162 kDa	0	0	0	0	0	0	1	0	0	0	2	0	0	0	0	0	0	0	1	0	0	0	2	0	0.360731	0.574011	-1.77065	NS	0.337528	-2.44671	NS	0.736854	-1.31874	NS
662	Beta-galactosidase OS=Homo sapiens GN=GLB1 PE=1 SV=2	sp|P16278	76 kDa	0	0	0	0	2	0	0	0	2	0	0	0	0	0	0	0	2	0	0	0	2	0	0	0	0.351158	0.379028	-2.27621	NS	0.369615	-2.31249	NS	0.975923	-1.02308	NS
663	Retinol dehydrogenase 11 OS=Homo sapiens GN=RDH11 PE=1 SV=2	sp|Q8TC12	35 kDa	2	0	0	1	2	0	0	1	2	0	1	1	2	0	0	1	3	0	0	1	4	0	1	1	0.678047	0.747916	-1.23996	NS	0.322071	-1.89861	NS	0.529872	-1.46526	NS
664	DNA-(apurinic or apyrimidinic site) lyase OS=Homo sapiens GN=APEX1 PE=1 SV=2	sp|P27695	36 kDa	0	1	1	0	1	0	1	0	1	0	1	0	0	1	2	0	1	0	1	0	1	0	1	0	0.90019	0.774233	1.26717	NS	0.718701	1.34527	NS	0.9739	1.02709	NS
665	Ras-related protein Rab-7a OS=Homo sapiens GN=RAB7A PE=1 SV=1	sp|P51149	23 kDa	2	0	1	1	0	0	0	1	0	0	0	1	2	0	1	1	0	0	0	1	0	0	0	1	0.276612	0.235961	2.83868	NS	0.232958	2.85439	NS	0.999253	1.00084	NS
666	Ras-related C3 botulinum toxin substrate 2 OS=Homo sapiens GN=RAC2 PE=1 SV=1	sp|P15153 (+2)	21 kDa	1	1	1	1	1	0	1	1	1	1	1	1	2	3	2	1	2	0	1	1	1	2	1	1	0.541156	0.2773	1.91175	NS	0.409486	1.59095	NS	0.765467	-1.22095	NS
667	Glutamate--cysteine ligase catalytic subunit OS=Homo sapiens GN=GCLC PE=1 SV=2	sp|P48506	73 kDa	0	0	1	0	0	0	0	0	0	0	2	0	0	0	1	0	0	0	0	0	0	0	2	0	0.365675	0.656649	1.5729	NS	0.630628	-1.48476	NS	0.392799	-2.22535	NS
668	Histone deacetylase 6 OS=Homo sapiens GN=HDAC6 PE=1 SV=2	sp|Q9UBN7	131 kDa	0	0	1	1	0	1	0	1	0	1	0	2	0	0	1	1	0	1	0	1	0	1	0	2	0.871058	0.92304	-1.09038	NS	0.626254	-1.49247	NS	0.718334	-1.31537	NS
669	Cytoplasmic dynein 1 intermediate chain 2 OS=Homo sapiens GN=DYNC1I2 PE=1 SV=3	sp|Q13409	71 kDa	1	1	1	1	1	0	1	0	1	1	1	1	2	1	2	1	2	0	2	0	1	1	2	2	0.81275	0.607047	1.39077	NS	0.933554	-1.04936	NS	0.568334	-1.44051	NS
670	Cytochrome c oxidase copper chaperone OS=Homo sapiens GN=COX17 PE=1 SV=2	sp|Q14061	7 kDa	1	0	1	1	1	1	1	1	1	1	1	1	1	0	3	3	1	1	3	1	1	3	2	1	0.973992	0.96934	1.02164	NS	0.920418	-1.05491	NS	0.856952	-1.10542	NS
671	Eukaryotic translation initiation factor 3 subunit K OS=Homo sapiens GN=EIF3K PE=1 SV=1	sp|Q9UBQ5	25 kDa	0	1	1	1	0	2	0	1	0	0	0	1	0	2	1	1	0	4	0	1	0	0	0	2	0.5968	0.724794	-1.25036	NS	0.476576	1.77367	NS	0.433884	1.82925	NS
672	Deoxyuridine 5'-triphosphate nucleotidohydrolase, mitochondrial OS=Homo sapiens GN=DUT PE=1 SV=4	sp|P33316	27 kDa	3	0	0	0	1	1	0	2	0	1	0	1	3	0	0	0	2	2	0	2	0	2	0	1	0.417445	0.319246	-2.13903	NS	0.860718	-1.16209	NS	0.330822	1.87683	NS
673	Glycogen debranching enzyme OS=Homo sapiens GN=AGL PE=1 SV=3	sp|P35573	175 kDa	0	1	2	1	0	1	1	0	0	0	2	0	0	1	2	1	0	1	1	0	0	0	2	0	0.663683	0.533302	1.62137	NS	0.503922	1.67761	NS	0.934155	1.06982	NS
674	Eukaryotic translation initiation factor 3 subunit F OS=Homo sapiens GN=EIF3F PE=1 SV=1	sp|O00303	38 kDa	0	1	1	0	1	1	0	0	1	1	1	0	0	1	2	0	2	2	0	0	1	2	1	0	0.878617	0.693592	-1.32331	NS	0.713819	-1.29767	NS	0.97637	1.01995	NS
675	Malignant T cell-amplified sequence 1 OS=Homo sapiens GN=MCTS1 PE=1 SV=1	sp|Q9ULC4	21 kDa	1	0	0	1	1	0	0	0	1	1	0	1	2	0	0	1	3	0	0	0	1	1	0	1	0.995899	0.972701	1.0245	NS	0.988038	-1.0114	NS	0.982915	-1.01632	NS
676	26S proteasome non-ATPase regulatory subunit 2 OS=Homo sapiens GN=PSMD2 PE=1 SV=3	sp|Q13200	100 kDa	1	0	0	0	0	2	0	1	0	0	1	0	2	0	0	0	0	2	0	1	0	0	1	0	0.639187	0.668018	-1.46229	NS	0.668232	1.47896	NS	0.373179	2.43483	NS
677	ATP-dependent RNA helicase DDX1 OS=Homo sapiens GN=DDX1 PE=1 SV=2	sp|Q92499	82 kDa	1	0	1	1	1	0	0	1	0	1	1	0	1	0	1	1	1	0	0	1	0	1	1	0	0.897974	0.734768	1.32211	NS	0.69265	1.43017	NS	0.974742	1.03218	NS
678	Frataxin, mitochondrial OS=Homo sapiens GN=FXN PE=1 SV=2	sp|Q16595	23 kDa	1	1	1	1	1	1	0	1	1	1	1	2	1	1	3	1	2	1	0	1	1	1	1	2	0.867452	0.596529	1.40404	NS	0.83244	1.13658	NS	0.750558	-1.23699	NS
679	Glutaminyl-tRNA synthetase OS=Homo sapiens GN=QARS PE=1 SV=1	sp|P47897	88 kDa	1	0	0	1	1	0	3	1	1	0	1	0	1	0	0	1	1	0	4	1	1	0	1	0	0.256715	0.237964	-2.7309	NS	0.966397	-1.03842	NS	0.156854	2.75864	NS
680	Annexin A7 OS=Homo sapiens GN=ANXA7 PE=1 SV=3	sp|P20073	53 kDa	2	0	1	0	1	0	0	2	1	1	0	1	2	0	1	0	1	0	0	2	2	1	0	1	0.902929	0.956848	-1.04182	NS	0.696779	-1.34481	NS	0.71418	-1.29693	NS
681	Dihydrolipoyllysine-residue succinyltransferase component of 2-oxoglutarate dehydrogenase complex, mitochondrial OS=Homo sapiens GN=DLST PE=1 SV=4	sp|P36957	49 kDa	1	1	1	1	2	1	1	0	1	1	1	1	1	1	2	1	3	1	2	0	1	2	2	1	0.908185	0.679837	-1.28386	NS	0.717408	-1.24467	NS	0.94754	1.03874	NS
682	Tripeptidyl-peptidase 1 OS=Homo sapiens GN=TPP1 PE=1 SV=2	sp|O14773	61 kDa	1	1	1	0	2	1	2	0	0	0	1	1	1	2	2	0	2	2	2	0	0	0	1	1	0.317942	0.707778	-1.24261	NS	0.27102	2.40877	NS	0.159363	3.14585	NS
683	DNA-directed RNA polymerases I, II, and III subunit RPABC3 OS=Homo sapiens GN=POLR2H PE=1 SV=4	sp|P52434	17 kDa	1	1	1	1	1	1	1	1	1	1	1	1	2	1	1	1	1	1	2	1	2	1	2	2	0.791397	0.914862	-1.07011	NS	0.52068	-1.45294	NS	0.607685	-1.34826	NS
684	Protein mago nashi homolog OS=Homo sapiens GN=MAGOH PE=1 SV=1	sp|P61326 (+1)	17 kDa	1	0	0	0	1	1	0	1	0	1	0	0	1	0	0	0	1	1	0	1	0	1	0	0	0.447022	0.36971	-2.31317	NS	0.978353	1.02751	NS	0.358391	2.35768	NS
685	NADPH:adrenodoxin oxidoreductase, mitochondrial OS=Homo sapiens GN=FDXR PE=1 SV=3	sp|P22570	54 kDa	0	0	0	0	1	0	0	1	0	0	0	0	0	0	0	0	1	0	0	1	0	0	0	0	0.104385	0.29963	-3.04568	NS	1	1	NS	0.31069	2.97197	NS
686	S-methyl-5'-thioadenosine phosphorylase OS=Homo sapiens GN=MTAP PE=1 SV=2	sp|Q13126	31 kDa	1	0	0	0	1	1	0	0	1	1	1	1	2	0	0	0	3	1	0	0	2	3	1	1	0.212653	0.516499	-1.5947	NS	0.0929632	-4.00059	NS	0.370457	-1.7348	NS
687	60S ribosomal protein L38 OS=Homo sapiens GN=RPL38 PE=1 SV=2	sp|P63173	8 kDa	0	0	2	0	1	0	0	0	0	0	1	0	0	0	2	0	1	0	0	0	0	0	1	0	0.837498	0.720228	1.38371	NS	0.735401	1.32081	NS	0.984017	1.02024	NS
688	Cell cycle progression protein 1 OS=Homo sapiens GN=CCPG1 PE=1 SV=3	sp|Q9ULG6	87 kDa	0	0	0	0	0	1	0	0	0	0	0	1	0	0	0	0	0	3	0	0	0	0	0	1	0.378346	0.248202	-2.93834	NS	0.594879	-1.71644	NS	0.566265	1.69474	NS
689	Cold-inducible RNA-binding protein OS=Homo sapiens GN=CIRBP PE=1 SV=1	sp|Q14011	19 kDa	0	0	0	1	0	1	0	1	0	1	1	1	0	0	0	1	0	1	0	1	0	1	1	1	0.572071	0.62235	-1.56049	NS	0.334007	-2.46321	NS	0.714432	-1.35135	NS
690	Ezrin OS=Homo sapiens GN=EZR PE=1 SV=4	sp|P15311	69 kDa	0	1	1	0	2	1	2	0	0	0	1	1	12	15	13	10	14	10	13	11	11	8	13	12	0.838679	0.920931	-1.0203	NS	0.645865	1.09966	NS	0.567237	1.12683	NS
691	Enoyl-CoA hydratase domain-containing protein 2, mitochondrial OS=Homo sapiens GN=ECHDC2 PE=2 SV=2	sp|Q86YB7	31 kDa	0	1	1	1	1	0	1	1	1	1	0	1	0	2	2	1	1	0	1	2	1	2	0	1	0.954202	0.856258	1.12917	NS	0.750927	1.23681	NS	0.980922	1.01706	NS
692	Protein KIAA0664 OS=Homo sapiens GN=KIAA0664 PE=1 SV=2	sp|O75153	147 kDa	0	0	0	1	0	1	1	0	0	0	2	0	0	0	0	1	0	1	1	0	0	0	2	0	0.779375	0.560966	-1.80542	NS	0.604953	-1.60946	NS	0.934155	1.06982	NS
693	Protein flightless-1 homolog OS=Homo sapiens GN=FLII PE=1 SV=2	sp|Q13045	145 kDa	0	0	2	0	0	1	2	1	0	0	1	0	0	0	2	0	0	1	2	1	0	0	1	0	0.346297	0.339596	-2.08802	NS	0.735401	1.32081	NS	0.181996	3.21292	NS
694	Proteasome-associated protein ECM29 homolog OS=Homo sapiens GN=ECM29 PE=1 SV=2	sp|Q5VYK3	204 kDa	0	1	2	0	0	1	1	0	0	0	0	0	0	1	3	0	0	2	1	0	0	0	0	0	0.106261	0.843287	1.14182	NS	0.118334	4.79376	NS	0.152357	4.17304	NS
695	NADH dehydrogenase [ubiquinone] 1 alpha subcomplex subunit 5 OS=Homo sapiens GN=NDUFA5 PE=1 SV=3	sp|Q16718	13 kDa	0	0	2	1	2	0	1	0	0	1	1	1	0	0	2	1	2	0	1	0	0	1	2	1	0.902929	0.894179	-1.10604	NS	0.643487	-1.38895	NS	0.751115	-1.27288	NS
696	Vacuolar protein-sorting-associated protein 25 OS=Homo sapiens GN=VPS25 PE=1 SV=1	sp|Q9BRG1	21 kDa	1	0	0	0	0	2	0	0	0	0	0	0	1	0	0	0	0	2	0	0	0	0	0	0	0.370438	0.677219	-1.45696	NS	0.611275	1.67607	NS	0.354074	2.37532	NS
697	Enoyl-CoA delta isomerase 2, mitochondrial OS=Homo sapiens GN=ECI2 PE=1 SV=4	sp|O75521	44 kDa	1	1	0	0	1	0	0	0	0	0	2	1	1	1	0	0	1	0	0	0	0	0	3	1	0.440893	0.627047	1.55093	NS	0.531349	-1.76185	NS	0.329705	-2.58549	NS
698	NADH dehydrogenase [ubiquinone] 1 alpha subcomplex subunit 4 OS=Homo sapiens GN=NDUFA4 PE=1 SV=1	sp|O00483	9 kDa	0	0	2	1	0	0	0	1	0	0	0	0	0	0	3	1	0	0	0	1	0	0	0	0	0.130233	0.328031	2.18763	NS	0.125962	4.6298	NS	0.614835	1.66754	NS
699	Dipeptidyl peptidase 4 OS=Homo sapiens GN=DPP4 PE=1 SV=2	sp|P27487	88 kDa	0	0	0	0	0	0	0	0	1	2	0	0	0	0	0	0	0	0	0	0	1	2	0	0	0.0585935	1	1	NS	0.178123	-3.84899	NS	0.168223	-3.96229	NS
700	Constitutive coactivator of PPAR-gamma-like protein 1 OS=Homo sapiens GN=FAM120A PE=1 SV=2	sp|Q9NZB2	122 kDa	0	0	1	1	0	0	2	0	0	0	1	0	0	0	1	1	0	0	2	0	0	0	2	0	0.982153	0.865651	-1.14842	NS	0.924006	-1.08104	NS	0.927652	1.07109	NS
701	Dynein light chain roadblock-type 2 OS=Homo sapiens GN=DYNLRB2 PE=1 SV=1	sp|Q8TF09 (+1)	11 kDa	0	0	1	1	0	0	0	1	0	1	1	0	0	0	3	1	0	0	0	2	0	1	2	0	0.791397	0.60372	1.46002	NS	0.805952	1.19085	NS	0.693753	-1.41754	NS
702	Eukaryotic translation initiation factor 4E OS=Homo sapiens GN=EIF4E PE=1 SV=2	sp|P06730	25 kDa	0	0	0	0	1	0	0	0	0	1	1	0	0	0	0	0	1	0	0	0	0	2	1	0	0.122905	0.626124	-1.641	NS	0.168422	-3.96266	NS	0.403442	-2.25707	NS
703	Complement C3 OS=Homo sapiens GN=C3 PE=1 SV=2	sp|P01024	187 kDa	0	0	0	0	0	0	0	0	0	0	1	0	0	0	0	0	0	0	0	0	0	0	1	0	0.332827	1	1	NS	0.594793	-1.71666	NS	0.636232	-1.61789	NS
704	Ras-related protein Rab-2A OS=Homo sapiens GN=RAB2A PE=1 SV=1	sp|P61019	24 kDa	2	1	0	1	1	0	1	2	1	1	0	1	2	1	0	2	1	0	1	2	1	1	0	2	0.954202	0.799553	1.18547	NS	0.778701	1.19525	NS	0.986886	1.01169	NS
705	Multifunctional protein ADE2 OS=Homo sapiens GN=PAICS PE=1 SV=3	sp|P22234	47 kDa	0	1	0	0	0	1	0	0	1	1	1	1	0	1	0	0	0	1	0	0	1	1	1	1	0.248599	0.985118	1.01682	NS	0.162092	-4.04143	NS	0.176421	-3.86871	NS
706	Tubulin beta-3 chain OS=Homo sapiens GN=TUBB3 PE=1 SV=2	sp|Q13509	50 kDa	1	2	0	0	2	1	0	1	1	0	1	1	47	34	44	52	55	44	34	48	45	27	45	47	0.511295	0.448319	-1.08363	NS	0.757427	1.03408	NS	0.288482	1.13278	NS
707	BH3-interacting domain death agonist OS=Homo sapiens GN=BID PE=1 SV=1	sp|P55957	22 kDa	1	1	0	0	2	1	1	0	1	1	1	1	2	1	0	0	3	1	1	0	1	2	2	1	0.550715	0.519774	-1.54527	NS	0.310297	-2.0079	NS	0.801587	-1.16412	NS
708	Replication protein A 14 kDa subunit OS=Homo sapiens GN=RPA3 PE=1 SV=1	sp|P35244	14 kDa	1	0	1	1	0	0	1	0	0	1	1	1	1	0	1	1	0	0	1	0	0	1	1	1	0.548151	0.428259	2.10461	NS	0.94169	-1.0616	NS	0.398525	-2.2045	NS
709	Saccharopine dehydrogenase-like oxidoreductase OS=Homo sapiens GN=SCCPDH PE=1 SV=1	sp|Q8NBX0	47 kDa	0	0	0	0	1	0	1	1	2	1	0	0	0	0	0	0	1	0	1	1	2	1	0	0	0.0799677	0.096421	-7.57002	NS	0.173771	-3.89763	NS	0.992386	1.00783	NS
710	V-type proton ATPase subunit G 1 OS=Homo sapiens GN=ATP6V1G1 PE=1 SV=3	sp|O75348	14 kDa	1	1	1	0	1	0	1	1	0	1	1	1	2	1	2	0	2	0	2	2	0	2	1	1	0.790982	0.662208	-1.30272	NS	0.759068	1.22796	NS	0.487791	1.55799	NS
711	ATP-dependent RNA helicase DDX3X OS=Homo sapiens GN=DDX3X PE=1 SV=3	sp|O00571	73 kDa	0	0	2	2	0	0	1	0	0	0	2	0	0	0	3	2	0	0	2	0	0	0	2	0	0.602816	0.43732	1.71008	NS	0.38151	1.82693	NS	0.927652	1.07109	NS
712	Niban-like protein 1 OS=Homo sapiens GN=FAM129B PE=1 SV=3	sp|Q96TA1	84 kDa	2	0	0	0	1	0	0	0	1	1	0	0	2	0	0	0	2	0	0	0	1	1	0	0	0.984697	0.962381	1.0363	NS	0.975012	1.02591	NS	0.987715	-1.01265	NS
713	Small nuclear ribonucleoprotein Sm D3 OS=Homo sapiens GN=SNRPD3 PE=1 SV=1	sp|P62318	14 kDa	0	1	0	0	1	0	0	1	0	0	0	0	0	1	0	0	1	0	0	1	0	0	0	0	0.242438	0.612474	-1.6737	NS	0.600172	1.70321	NS	0.31069	2.97197	NS
714	Purine nucleoside phosphorylase OS=Homo sapiens GN=PNP PE=1 SV=2	sp|P00491	32 kDa	0	0	0	0	1	0	0	1	1	1	0	0	0	0	0	0	2	0	0	1	1	2	0	0	0.0869026	0.165237	-4.00023	NS	0.178123	-3.84899	NS	0.995635	-1.00415	NS
715	Quinone oxidoreductase PIG3 OS=Homo sapiens GN=TP53I3 PE=1 SV=2	sp|Q53FA7	36 kDa	0	1	1	1	0	0	0	0	0	0	0	0	0	1	1	1	0	0	0	0	0	0	0	0	0.0407303	0.128685	6.49983	NS	0.119346	6.76517	NS	1	1	NS
716	Glutamine synthetase OS=Homo sapiens GN=GLUL PE=1 SV=4	sp|P15104	42 kDa	2	0	0	1	2	0	0	0	2	2	0	1	4	0	0	1	2	0	0	0	2	2	0	1	0.50795	0.292654	2.05884	NS	0.991084	1.00677	NS	0.2775	-2.21954	NS
717	Ganglioside GM2 activator OS=Homo sapiens GN=GM2A PE=1 SV=4	sp|P17900	21 kDa	0	1	0	0	1	0	0	0	1	1	0	0	0	1	0	0	1	0	0	0	1	1	0	0	0.788142	0.979234	1.02637	NS	0.685148	-1.44294	NS	0.647896	-1.51083	NS
718	Activator of 90 kDa heat shock protein ATPase homolog 1 OS=Homo sapiens GN=AHSA1 PE=1 SV=1	sp|O95433	38 kDa	1	1	1	0	0	1	0	0	0	0	1	0	1	1	1	0	0	1	0	0	0	0	1	0	0.506968	0.37427	2.29695	NS	0.37876	2.27845	NS	0.967204	1.04199	NS
719	Splicing factor, proline- and glutamine-rich OS=Homo sapiens GN=SFPQ PE=1 SV=2	sp|P23246	76 kDa	1	0	0	0	2	0	1	0	1	1	0	1	2	0	0	0	2	0	1	0	2	1	0	1	0.684785	0.706511	-1.33174	NS	0.453045	-1.78556	NS	0.705816	-1.33235	NS
720	Bis(5'-nucleosyl)-tetraphosphatase [asymmetrical] OS=Homo sapiens GN=NUDT2 PE=1 SV=3	sp|P50583	17 kDa	1	1	0	0	1	0	1	1	1	1	0	0	2	1	0	0	2	0	1	1	3	1	0	0	0.879008	0.695682	-1.34668	NS	0.774618	-1.21115	NS	0.995332	-1.00415	NS
721	Alpha-centractin OS=Homo sapiens GN=ACTR1A PE=1 SV=1	sp|P61163	43 kDa	1	1	0	1	0	0	0	0	0	0	1	0	3	1	0	1	0	0	0	0	0	0	3	0	0.0778989	0.0381058	11.2232	NS	0.4158	2.05939	NS	0.256231	-2.82755	NS
722	Bifunctional coenzyme A synthase OS=Homo sapiens GN=COASY PE=1 SV=4	sp|Q13057	62 kDa	0	1	0	1	0	0	0	0	0	0	1	0	0	1	0	1	0	0	0	0	0	0	2	0	0.232882	0.315064	2.9455	NS	0.930365	1.08423	NS	0.392799	-2.22535	NS
723	Translational activator GCN1 OS=Homo sapiens GN=GCN1L1 PE=1 SV=6	sp|Q92616	293 kDa	0	1	0	0	0	0	0	0	0	0	0	0	0	1	0	0	0	0	0	0	0	0	0	0	0.344071	0.607912	1.6842	NS	0.600172	1.70321	NS	1	1	NS
724	Gelsolin OS=Homo sapiens GN=GSN PE=1 SV=1	sp|P06396	86 kDa	3	0	0	0	2	0	0	0	0	0	0	0	3	0	0	0	2	0	0	0	0	0	0	0	0.37018	0.682436	1.33692	NS	0.24302	3.03395	NS	0.373719	2.29651	NS
725	Beta-hexosaminidase subunit alpha OS=Homo sapiens GN=HEXA PE=1 SV=2	sp|P06865	61 kDa	0	0	0	0	0	1	0	0	0	0	1	0	0	0	0	0	0	2	0	0	0	0	1	0	0.361764	0.37414	-2.29488	NS	0.594793	-1.71666	NS	0.620581	1.56429	NS
726	Thioredoxin domain-containing protein 5 OS=Homo sapiens GN=TXNDC5 PE=1 SV=2	sp|Q8NBS9	48 kDa	0	0	0	0	0	0	0	1	0	0	0	0	0	0	0	0	0	0	0	1	0	0	0	0	0.323091	0.594513	-1.71737	NS	1	1	NS	0.614835	1.66754	NS
727	Cysteine-rich protein 2 OS=Homo sapiens GN=CRIP2 PE=1 SV=1	sp|P52943	22 kDa	0	1	1	0	0	1	1	1	0	0	1	0	0	3	1	0	0	3	4	1	0	0	2	0	0.283227	0.207248	-2.05373	NS	0.538547	1.61064	NS	0.0585652	3.67761	NS
728	Small nuclear ribonucleoprotein Sm D1 OS=Homo sapiens GN=SNRPD1 PE=1 SV=1	sp|P62314	13 kDa	0	1	0	1	0	1	0	1	0	1	0	1	0	3	0	1	0	4	0	2	0	2	0	1	0.870534	0.556433	-1.40795	NS	0.71373	1.27824	NS	0.341519	1.794	NS
729	PCTP-like protein OS=Homo sapiens GN=STARD10 PE=2 SV=2	sp|Q9Y365	33 kDa	1	1	0	1	0	0	0	0	1	2	0	0	1	1	0	1	0	0	0	0	1	2	0	0	0.0965807	0.112201	6.98731	NS	0.971836	1.02706	NS	0.168223	-3.96229	NS
730	Proteasome subunit beta type-8 OS=Homo sapiens GN=PSMB8 PE=1 SV=3	sp|P28062	30 kDa	0	2	0	1	0	1	0	0	0	1	0	0	0	2	0	1	0	1	0	0	0	1	0	0	0.513519	0.408782	2.00327	NS	0.393326	2.0497	NS	0.984173	1.01791	NS
731	WD repeat-containing protein 1 OS=Homo sapiens GN=WDR1 PE=1 SV=4	sp|O75083	66 kDa	1	0	1	0	1	1	0	1	1	0	1	0	1	0	1	0	2	1	0	1	1	0	1	0	0.587621	0.394654	-2.04715	NS	0.969248	-1.03199	NS	0.404183	2.01681	NS
732	Vesicle-trafficking protein SEC22b OS=Homo sapiens GN=SEC22B PE=1 SV=4	sp|O75396	25 kDa	0	2	0	1	0	1	0	0	2	1	1	0	0	2	0	1	0	1	0	0	2	1	1	0	0.393784	0.408782	2.00327	NS	0.700306	-1.36413	NS	0.219585	-2.93845	NS
733	Bile acid-CoA:amino acid N-acyltransferase OS=Homo sapiens GN=BAAT PE=1 SV=1	sp|Q14032	46 kDa	0	1	1	0	0	0	0	0	0	0	0	2	0	1	1	0	0	0	0	0	0	0	0	2	0.23756	0.328621	2.86564	NS	0.930307	1.08431	NS	0.36485	-2.33134	NS
734	Endoplasmic reticulum resident protein 44 OS=Homo sapiens GN=ERP44 PE=1 SV=1	sp|Q9BS26	47 kDa	0	0	0	1	1	0	0	1	1	1	1	0	0	0	0	1	2	0	0	1	4	1	1	0	0.193397	0.396637	-2.03971	NS	0.0927615	-4.76699	NS	0.306758	-2.01724	NS
735	Methylcrotonoyl-CoA carboxylase subunit alpha, mitochondrial OS=Homo sapiens GN=MCCC1 PE=1 SV=3	sp|Q96RQ3	80 kDa	0	1	1	0	1	0	0	0	1	0	1	1	0	1	1	0	1	0	0	0	1	0	2	1	0.379455	0.637872	1.61523	NS	0.369361	-2.12576	NS	0.222017	-2.92315	NS
736	Apolipoprotein C-III OS=Homo sapiens GN=APOC3 PE=1 SV=1	sp|P02656	11 kDa	1	1	0	1	1	1	1	1	1	1	0	1	1	2	0	1	1	1	1	1	1	1	0	2	0.995813	0.968495	-1.02836	NS	0.993876	-1.00513	NS	0.980922	1.01706	NS
737	COP9 signalosome complex subunit 8 OS=Homo sapiens GN=COPS8 PE=1 SV=1	sp|Q99627	23 kDa	1	0	0	1	0	1	0	0	0	0	0	0	2	0	0	1	0	1	0	0	0	0	0	0	0.136836	0.395315	2.35801	NS	0.169654	3.94631	NS	0.607449	1.68532	NS
738	Protein S100-A16 OS=Homo sapiens GN=S100A16 PE=1 SV=1	sp|Q96FQ6	12 kDa	0	0	1	1	1	1	1	1	1	1	0	1	0	0	1	1	2	1	1	1	1	2	0	1	0.457381	0.209143	-2.71134	NS	0.391641	-2.05548	NS	0.721321	1.26944	NS
739	Eukaryotic translation initiation factor 1A, Y-chromosomal OS=Homo sapiens GN=EIF1AY PE=1 SV=4	sp|O14602 (+1)	16 kDa	0	0	1	0	0	1	0	0	1	1	0	0	0	0	1	0	0	2	0	0	1	1	0	0	0.77971	0.628804	-1.54835	NS	0.613505	-1.67128	NS	0.984831	1.01565	NS
740	Prefoldin subunit 2 OS=Homo sapiens GN=PFDN2 PE=1 SV=1	sp|Q9UHV9	17 kDa	1	1	1	0	1	1	0	0	0	0	0	1	1	1	1	0	2	1	0	0	0	0	0	1	0.518142	0.994788	1.00498	NS	0.318227	2.92591	NS	0.397647	2.31825	NS
741	Protein S100-A8 OS=Homo sapiens GN=S100A8 PE=1 SV=1	sp|P05109	11 kDa	1	0	1	1	1	1	1	0	0	1	1	0	2	0	2	2	1	1	1	0	0	1	1	0	0.354115	0.371683	1.8515	NS	0.188697	2.83933	NS	0.639603	1.46954	NS
742	Acylphosphatase-2 OS=Homo sapiens GN=ACYP2 PE=1 SV=2	sp|P14621	11 kDa	1	0	1	1	1	0	1	1	0	1	1	1	1	0	1	2	1	0	2	1	0	2	1	1	0.996043	0.875368	-1.11045	NS	0.945212	-1.04985	NS	0.941747	1.05306	NS
743	Glycine N-acyltransferase OS=Homo sapiens GN=GLYAT PE=1 SV=3	sp|Q6IB77	34 kDa	0	0	1	0	0	1	0	0	0	0	3	2	0	0	1	0	0	1	0	0	0	0	4	2	0.325716	0.961184	-1.04995	NS	0.0843783	-3.83547	NS	0.17265	-3.19359	NS
744	60S ribosomal protein L10 OS=Homo sapiens GN=RPL10 PE=1 SV=4	sp|P27635	25 kDa	0	0	2	1	1	0	0	0	1	0	0	1	0	0	3	1	1	0	0	0	1	0	0	1	0.434021	0.349012	2.64934	NS	0.581179	1.66201	NS	0.641162	-1.52356	NS
745	Dipeptidyl peptidase 3 OS=Homo sapiens GN=DPP3 PE=1 SV=2	sp|Q9NY33	83 kDa	0	1	1	3	0	0	3	0	0	0	0	0	0	2	2	3	0	0	3	0	0	0	0	0	0.0362712	0.269358	2.28819	NS	0.0149966	14.2965	0.0449899	0.236528	3.18863	NS	+
746	Hydroxyacylglutathione hydrolase, mitochondrial OS=Homo sapiens GN=HAGH PE=1 SV=2	sp|Q16775	34 kDa	0	0	1	0	1	1	0	0	0	1	0	0	0	0	1	0	1	1	0	0	0	1	0	0	0.765085	0.591646	-1.72592	NS	0.99385	-1.00774	NS	0.645763	1.51486	NS
747	Extended synaptotagmin-1 OS=Homo sapiens GN=ESYT1 PE=1 SV=1	sp|Q9BSJ8	123 kDa	0	0	0	0	0	0	2	0	0	0	0	0	0	0	0	0	0	0	2	0	0	0	0	0	0.28069	0.311022	-2.57239	NS	1	1	NS	0.336812	2.44991	NS
748	Toll-interacting protein OS=Homo sapiens GN=TOLLIP PE=1 SV=1	sp|Q9H0E2	30 kDa	0	0	1	0	0	0	0	1	1	0	0	0	0	0	2	0	0	0	0	1	1	0	0	0	0.855166	0.750826	1.33374	NS	0.687803	1.43841	NS	0.992457	-1.0095	NS
749	Tubulin--tyrosine ligase-like protein 12 OS=Homo sapiens GN=TTLL12 PE=1 SV=2	sp|Q14166	74 kDa	0	0	0	1	0	1	0	0	1	1	1	0	0	0	0	2	0	1	0	0	1	1	1	0	0.608912	0.685151	1.44312	NS	0.511257	-1.9087	NS	0.384198	-2.25707	NS
750	Aldose 1-epimerase OS=Homo sapiens GN=GALM PE=1 SV=1	sp|Q96C23	38 kDa	0	1	0	0	0	0	0	0	0	0	0	0	0	2	0	0	0	0	0	0	0	0	0	0	0.296767	0.354685	2.37278	NS	0.344523	2.41592	NS	1	1	NS
751	Hematological and neurological expressed 1-like protein OS=Homo sapiens GN=HN1L PE=1 SV=1	sp|Q9H910	20 kDa	1	1	0	1	0	0	2	0	0	0	0	0	1	1	0	1	0	0	2	0	0	0	0	0	0.12355	0.595591	1.68401	NS	0.111835	6.99998	NS	0.336812	2.44991	NS
752	Eukaryotic translation initiation factor 5B OS=Homo sapiens GN=EIF5B PE=1 SV=4	sp|O60841	139 kDa	0	0	1	0	0	0	0	0	0	0	0	0	0	0	1	0	0	0	0	0	0	0	0	0	0.344071	0.656649	1.5729	NS	0.635676	1.61915	NS	1	1	NS
753	Ras-related protein Rab-10 OS=Homo sapiens GN=RAB10 PE=1 SV=1	sp|P61026	23 kDa	1	0	0	1	0	1	0	1	1	0	1	1	4	2	4	2	3	5	5	1	3	4	5	2	0.837229	0.571794	-1.24923	NS	0.634382	-1.20557	NS	0.897221	1.05006	NS
754	UDP-glucuronosyltransferase 1-1 OS=Homo sapiens GN=UGT1A1 PE=1 SV=1	sp|P22309	60 kDa	0	1	0	0	0	0	0	0	0	0	0	0	2	3	4	2	0	0	5	1	4	2	5	0	0.390844	0.217451	2.2897	NS	0.938817	-1.0333	NS	0.274096	-2.12357	NS
755	Redox-regulatory protein PAMM OS=Homo sapiens GN=C10orf58 PE=1 SV=3	sp|Q9BRX8	26 kDa	0	1	1	0	0	0	0	1	0	0	0	0	0	1	2	0	0	0	0	1	0	0	0	0	0.1357	0.437922	2.09538	NS	0.174658	3.89047	NS	0.614835	1.66754	NS
756	Twinfilin-1 OS=Homo sapiens GN=TWF1 PE=1 SV=3	sp|Q12792	40 kDa	0	1	1	1	0	1	0	1	1	1	0	1	0	1	1	1	0	1	0	2	1	2	0	1	0.904094	0.923399	-1.07549	NS	0.695011	-1.34743	NS	0.736509	-1.26988	NS
757	Nucleosome assembly protein 1-like 1 OS=Homo sapiens GN=NAP1L1 PE=1 SV=1	sp|P55209	45 kDa	1	0	2	0	1	0	1	0	0	0	0	0	1	0	2	0	1	0	1	0	0	0	0	0	0.123954	0.787821	1.22776	NS	0.179174	3.83861	NS	0.29694	3.06351	NS
758	Uncharacterized protein C1orf31 OS=Homo sapiens GN=C1orf31 PE=2 SV=1	sp|Q5JTJ3	14 kDa	0	0	1	1	0	1	0	1	0	1	0	1	0	0	2	1	0	1	0	1	0	1	0	1	0.90019	0.784343	1.25326	NS	0.739893	1.31451	NS	0.984865	1.01561	NS
759	Serine/threonine-protein phosphatase PP1-beta catalytic subunit OS=Homo sapiens GN=PPP1CB PE=1 SV=3	sp|P62140	37 kDa	0	0	0	0	1	0	0	0	0	0	1	0	0	0	0	0	1	0	0	0	0	0	1	0	0.430138	0.626124	-1.641	NS	0.594793	-1.71666	NS	0.984017	1.02024	NS
760	LIM and SH3 domain protein 1 OS=Homo sapiens GN=LASP1 PE=1 SV=2	sp|Q14847	30 kDa	0	0	1	0	1	0	0	0	0	1	1	0	0	0	2	0	1	0	0	0	0	1	1	0	0.829577	0.720228	1.38371	NS	0.956894	-1.04516	NS	0.636982	-1.61626	NS
761	Glutathione S-transferase theta-1 OS=Homo sapiens GN=GSTT1 PE=1 SV=4	sp|P30711	27 kDa	1	0	1	0	0	0	0	0	0	0	0	1	1	0	2	0	0	0	0	0	0	0	0	1	0.135987	0.192783	3.70184	NS	0.42813	2.18688	NS	0.615573	-1.66578	NS
762	Alpha-actinin-1 OS=Homo sapiens GN=ACTN1 PE=1 SV=2	sp|P12814	103 kDa	0	0	0	0	2	0	1	0	0	1	0	0	18	14	21	17	22	17	20	23	23	22	18	16	0.379928	0.159294	-1.25741	NS	0.358801	-1.16257	NS	0.676717	1.06797	NS
763	Cytoplasmic dynein 1 heavy chain 1 OS=Homo sapiens GN=DYNC1H1 PE=1 SV=5	sp|Q14204	532 kDa	0	1	0	0	0	0	0	0	0	0	1	0	0	1	0	0	0	0	0	0	0	0	1	0	0.45807	0.607912	1.6842	NS	0.99385	-1.00774	NS	0.636232	-1.61789	NS
764	Transmembrane protein 109 OS=Homo sapiens GN=TMEM109 PE=1 SV=1	sp|Q9BVC6	26 kDa	0	0	0	0	1	1	0	0	0	1	0	1	0	0	0	0	1	1	0	0	0	2	0	1	0.11223	0.318456	-2.92341	NS	0.168456	-3.96224	NS	0.696653	-1.37804	NS
765	Epoxide hydrolase 2 OS=Homo sapiens GN=EPHX2 PE=1 SV=2	sp|P34913	63 kDa	0	0	0	0	0	0	0	0	0	0	1	0	0	0	0	0	0	0	0	0	0	0	1	0	0.332827	1	1	NS	0.594793	-1.71666	NS	0.636232	-1.61789	NS
766	Mitochondrial-processing peptidase subunit alpha OS=Homo sapiens GN=PMPCA PE=1 SV=2	sp|Q10713	58 kDa	1	1	1	0	2	1	1	0	1	1	1	0	1	1	1	0	2	1	1	0	1	1	1	0	0.878429	0.696285	-1.31991	NS	0.997486	-1.00239	NS	0.695716	1.32011	NS
767	Probable 2-oxoglutarate dehydrogenase E1 component DHKTD1, mitochondrial OS=Homo sapiens GN=DHTKD1 PE=2 SV=2	sp|Q96HY7	103 kDa	1	1	0	1	1	0	1	0	0	1	0	1	1	1	0	1	1	0	1	0	0	1	0	1	0.897974	0.683603	1.44651	NS	0.687852	1.39191	NS	0.9788	1.02694	NS
768	ADP-sugar pyrophosphatase OS=Homo sapiens GN=NUDT5 PE=1 SV=1	sp|Q9UKK9	24 kDa	0	0	0	0	0	1	1	1	0	0	1	0	0	0	0	0	0	1	1	1	0	0	1	0	0.106427	0.095489	-7.60553	NS	0.594793	-1.71666	NS	0.331702	2.47252	NS
769	Adapter molecule crk OS=Homo sapiens GN=CRK PE=1 SV=2	sp|P46108	34 kDa	1	0	0	0	1	1	1	0	1	0	1	0	1	0	0	0	1	1	1	0	1	0	1	0	0.555335	0.355529	-2.37244	NS	0.641996	-1.52216	NS	0.651899	1.44916	NS
770	Putative PDZ domain-containing protein 1P OS=Homo sapiens GN=PDZK1P1 PE=5 SV=2	sp|A8MUH7 (+1)	44 kDa	0	0	0	0	0	0	0	1	0	1	1	0	0	0	0	0	0	0	0	1	0	1	1	0	0.241582	0.594513	-1.71737	NS	0.302467	-3.02717	NS	0.64451	-1.59913	NS
771	D-tyrosyl-tRNA(Tyr) deacylase 1 OS=Homo sapiens GN=DTD1 PE=1 SV=2	sp|Q8TEA8	23 kDa	0	1	1	0	0	0	1	0	1	0	1	0	0	1	1	0	0	0	2	0	1	0	2	0	0.869619	0.891488	-1.11811	NS	0.646315	-1.45853	NS	0.767433	-1.25235	NS
772	Threonyl-tRNA synthetase, cytoplasmic OS=Homo sapiens GN=TARS PE=1 SV=3	sp|P26639	83 kDa	0	0	1	0	0	0	1	0	0	0	1	0	0	0	1	0	0	0	1	0	0	0	1	0	0.999009	0.915734	-1.09946	NS	0.958298	-1.0479	NS	0.957168	1.04924	NS
773	Inosine triphosphate pyrophosphatase OS=Homo sapiens GN=ITPA PE=1 SV=2	sp|Q9BY32	21 kDa	1	1	0	0	0	0	0	1	0	0	0	0	1	1	0	0	0	0	0	1	0	0	0	0	0.258182	0.617504	1.66169	NS	0.293868	3.08347	NS	0.614835	1.66754	NS
774	Interleukin-18 OS=Homo sapiens GN=IL18 PE=1 SV=1	sp|Q14116	22 kDa	1	0	0	0	1	0	0	0	0	1	0	0	1	0	0	0	1	0	0	0	0	1	0	0	0.999009	0.977741	1.02527	NS	0.978353	1.02751	NS	0.999118	1.00111	NS
775	Serine/threonine-protein phosphatase 2A catalytic subunit beta isoform OS=Homo sapiens GN=PPP2CB PE=1 SV=1	sp|P62714 (+1)	36 kDa	0	0	0	2	0	0	1	0	0	1	0	0	0	0	0	2	0	0	1	0	0	1	0	0	0.910515	0.731102	1.36531	NS	0.677158	1.45743	NS	0.967204	1.04199	NS
776	Proliferating cell nuclear antigen OS=Homo sapiens GN=PCNA PE=1 SV=1	sp|P12004	29 kDa	0	0	1	1	0	1	0	0	0	0	1	1	0	0	1	1	0	1	0	0	0	0	2	1	0.612207	0.670459	1.54313	NS	0.62489	-1.44964	NS	0.415999	-2.2045	NS
777	Vitronectin OS=Homo sapiens GN=VTN PE=1 SV=1	sp|P04004	54 kDa	0	0	1	1	0	2	1	0	0	0	0	0	0	0	2	1	0	2	2	0	0	0	0	0	0.0749233	0.597372	-1.45543	NS	0.189087	3.73281	NS	0.0931022	5.28616	NS
778	40S ribosomal protein S15 OS=Homo sapiens GN=RPS15 PE=1 SV=2	sp|P62841	17 kDa	1	1	0	1	1	0	0	0	0	0	1	0	1	1	0	1	1	0	0	0	0	0	1	0	0.506968	0.358516	2.35802	NS	0.318228	2.92591	NS	0.984017	1.02024	NS
779	Transcription factor BTF3 OS=Homo sapiens GN=BTF3 PE=1 SV=1	sp|P20290	22 kDa	0	0	0	0	0	0	0	0	0	1	0	0	0	0	0	0	0	0	0	0	0	1	0	0	0.332827	1	1	NS	0.630269	-1.63146	NS	0.622967	-1.64835	NS
780	Regulator of nonsense transcripts 1 OS=Homo sapiens GN=UPF1 PE=1 SV=2	sp|Q92900	124 kDa	0	0	1	1	0	0	1	0	0	0	1	0	0	0	3	1	0	0	2	0	0	0	1	0	0.600623	0.629022	1.41763	NS	0.296292	2.30105	NS	0.629243	1.48714	NS
781	Serum amyloid A protein OS=Homo sapiens GN=SAA1 PE=1 SV=2	sp|P02735	14 kDa	0	1	0	1	0	0	1	1	0	1	0	1	0	2	0	2	0	0	1	2	0	2	0	1	0.947035	0.807502	1.18923	NS	0.739007	1.24985	NS	0.967567	1.03122	NS
782	Protein phosphatase 1B OS=Homo sapiens GN=PPM1B PE=1 SV=1	sp|O75688 (+1)	53 kDa	0	1	1	0	0	0	1	0	0	1	0	1	0	1	3	0	0	0	1	0	0	1	0	1	0.464847	0.323759	2.20346	NS	0.552116	1.7276	NS	0.64451	-1.59913	NS
783	Translin-associated protein X OS=Homo sapiens GN=TSNAX PE=1 SV=1	sp|Q99598	33 kDa	0	1	1	0	0	0	0	0	1	0	0	0	0	1	2	0	0	0	0	0	1	0	0	0	0.135679	0.194371	3.68531	NS	0.396842	2.27844	NS	0.608224	-1.68344	NS
784	Phosphoglucomutase-2 OS=Homo sapiens GN=PGM2 PE=1 SV=4	sp|Q96G03	68 kDa	0	0	0	0	0	0	0	0	1	0	0	0	0	0	0	0	0	0	0	0	1	0	0	0	0.332827	1	1	NS	0.619135	-1.65734	NS	0.608224	-1.68344	NS
785	Long-chain-fatty-acid--CoA ligase 4 OS=Homo sapiens GN=ACSL4 PE=1 SV=2	sp|O60488	79 kDa	1	1	1	0	0	0	1	1	0	0	2	1	1	1	2	0	0	0	1	1	0	0	2	1	0.757552	0.496636	1.77691	NS	0.772451	1.24619	NS	0.756552	-1.26594	NS
786	Elongation factor Ts, mitochondrial OS=Homo sapiens GN=TSFM PE=1 SV=2	sp|P43897	35 kDa	0	1	0	0	0	1	0	1	1	0	2	0	0	2	0	0	0	1	0	1	1	0	2	0	0.869396	0.99892	1.00111	NS	0.655975	-1.48396	NS	0.768062	-1.32031	NS
787	Tripeptidyl-peptidase 2 OS=Homo sapiens GN=TPP2 PE=1 SV=4	sp|P29144	138 kDa	1	0	1	1	1	0	0	1	0	0	0	1	1	0	1	1	1	0	0	1	0	0	0	2	0.896086	0.734768	1.32211	NS	0.749694	1.30051	NS	0.994534	-1.00561	NS
788	Signal transducer and activator of transcription 3 OS=Homo sapiens GN=STAT3 PE=1 SV=2	sp|P40763	88 kDa	0	1	1	0	0	1	0	1	1	0	0	1	0	1	1	0	0	1	0	1	1	0	0	1	0.99802	0.951581	-1.0559	NS	0.979305	-1.02629	NS	0.998459	1.00173	NS
789	Ras suppressor protein 1 OS=Homo sapiens GN=RSU1 PE=1 SV=3	sp|Q15404	32 kDa	1	1	0	0	0	0	0	0	0	0	0	0	1	1	0	0	0	0	0	0	0	0	0	0	0.118383	0.294395	3.07966	NS	0.293868	3.08347	NS	1	1	NS
790	Peflin OS=Homo sapiens GN=PEF1 PE=1 SV=1	sp|Q9UBV8	30 kDa	1	1	1	0	1	1	0	1	1	1	0	0	1	1	1	0	2	1	0	1	1	1	0	0	0.690852	0.692815	-1.35063	NS	0.667307	1.42414	NS	0.449708	1.79287	NS
791	Partner of Y14 and mago OS=Homo sapiens GN=WIBG PE=1 SV=1	sp|Q9BRP8	23 kDa	1	0	0	1	1	0	1	0	1	1	1	1	2	0	0	2	2	0	1	0	1	1	1	1	0.934741	0.752749	1.2511	NS	0.955898	-1.03991	NS	0.728328	-1.30233	NS
792	Small glutamine-rich tetratricopeptide repeat-containing protein alpha OS=Homo sapiens GN=SGTA PE=1 SV=1	sp|O43765	34 kDa	1	1	0	1	1	0	1	1	1	1	1	0	2	1	0	1	1	0	1	1	1	1	1	0	0.935045	0.739078	1.28864	NS	0.703886	1.33511	NS	0.966329	1.03509	NS
793	Dynein light chain Tctex-type 1 OS=Homo sapiens GN=DYNLT1 PE=1 SV=1	sp|P63172	12 kDa	0	0	1	0	0	0	0	0	0	0	0	0	0	0	2	0	0	0	0	0	0	0	0	0	0.28039	0.421167	2.12791	NS	0.392037	2.22809	NS	1	1	NS
794	Apolipoprotein E OS=Homo sapiens GN=APOE PE=1 SV=1	sp|P02649	36 kDa	1	0	1	0	0	0	0	1	1	1	0	1	1	0	1	0	0	0	0	1	2	2	0	1	0.211823	0.666661	1.55139	NS	0.249234	-2.50111	NS	0.124271	-3.66085	NS
795	26S proteasome non-ATPase regulatory subunit 13 OS=Homo sapiens GN=PSMD13 PE=1 SV=2	sp|Q9UNM6	43 kDa	1	0	0	0	2	0	0	0	1	1	1	0	1	0	0	0	2	0	0	0	2	2	1	0	0.19827	0.710544	-1.35708	NS	0.124275	-3.60706	NS	0.286608	-2.18779	NS
796	High mobility group protein B3 OS=Homo sapiens GN=HMGB3 PE=1 SV=4	sp|O15347	23 kDa	1	0	0	1	1	1	1	0	1	0	0	0	1	0	0	1	2	1	2	0	1	0	0	0	0.188166	0.228884	-2.64311	NS	0.665052	1.4791	NS	0.111864	3.75891	NS
797	LDLR chaperone MESD OS=Homo sapiens GN=MESDC2 PE=1 SV=2	sp|Q14696	26 kDa	0	1	1	0	0	0	1	1	1	0	1	0	0	1	1	0	0	0	1	1	1	0	2	0	0.871058	0.902076	-1.11657	NS	0.646315	-1.45853	NS	0.731018	-1.32719	NS
798	Alpha-N-acetylgalactosaminidase OS=Homo sapiens GN=NAGA PE=1 SV=2	sp|P17050	47 kDa	0	0	0	1	0	0	0	1	2	0	1	1	0	0	0	1	0	0	0	1	2	0	1	1	0.25043	0.957724	-1.04858	NS	0.188694	-3.15993	NS	0.213332	-2.97996	NS
799	Long-chain-fatty-acid--CoA ligase 5 OS=Homo sapiens GN=ACSL5 PE=1 SV=1	sp|Q9ULC5	76 kDa	0	1	1	1	0	1	0	0	0	1	0	0	1	1	1	3	1	2	4	1	0	2	3	0	0.651736	0.494665	-1.47626	NS	0.688817	1.32899	NS	0.331266	1.72598	NS
800	Serpin B6 OS=Homo sapiens GN=SERPINB6 PE=1 SV=3	sp|P35237	43 kDa	2	0	0	0	1	0	0	0	2	0	0	0	2	0	0	0	1	0	0	0	2	0	0	0	0.958571	0.654604	1.44448	NS	0.98645	1.01292	NS	0.664568	-1.42827	NS
801	Alcohol dehydrogenase 4 OS=Homo sapiens GN=ADH4 PE=1 SV=5	sp|P08319	40 kDa	1	1	0	0	0	0	0	0	1	1	0	0	2	2	2	2	0	0	0	0	3	3	2	4	0.000262461	0.00203341	95708.3	0.00406682	0.333132	-1.54877	NS	0.000298783	-97132.8	0.000896349	+
802	Sorting nexin-3 OS=Homo sapiens GN=SNX3 PE=1 SV=3	sp|O60493	19 kDa	0	0	0	0	1	0	0	0	0	1	0	0	0	0	0	0	1	0	0	0	0	1	0	0	0.430138	0.626124	-1.641	NS	0.630269	-1.63146	NS	0.999118	1.00111	NS
803	Alpha-crystallin B chain OS=Homo sapiens GN=CRYAB PE=1 SV=2	sp|P02511	20 kDa	0	0	0	0	2	0	0	0	0	1	0	1	0	0	0	0	2	0	0	0	0	1	0	1	0.199765	0.379028	-2.27621	NS	0.302525	-3.02678	NS	0.891656	-1.13444	NS
804	HIG1 domain family member 1A OS=Homo sapiens GN=HIGD1A PE=1 SV=1	sp|Q9Y241	10 kDa	0	1	0	1	0	1	0	1	0	1	0	0	0	1	0	2	0	1	0	2	0	1	0	0	0.527828	0.94493	-1.05009	NS	0.416338	1.9821	NS	0.399111	2.03136	NS
805	Lambda-crystallin homolog OS=Homo sapiens GN=CRYL1 PE=1 SV=3	sp|Q9Y2S2	35 kDa	0	1	0	0	0	0	0	0	0	1	0	0	0	1	0	0	0	0	0	0	0	1	0	0	0.45807	0.607912	1.6842	NS	0.969299	1.03504	NS	0.622967	-1.64835	NS
806	Tubulin-folding cofactor B OS=Homo sapiens GN=TBCB PE=1 SV=2	sp|Q99426	27 kDa	1	0	1	1	0	0	1	0	0	0	2	1	1	0	2	1	0	0	1	0	0	0	2	1	0.407123	0.270207	2.64935	NS	0.814639	1.18136	NS	0.452346	-1.8838	NS
807	Pyridoxine-5'-phosphate oxidase OS=Homo sapiens GN=PNPO PE=1 SV=1	sp|Q9NVS9	30 kDa	1	0	0	0	1	0	0	0	0	1	0	1	1	0	0	0	1	0	0	0	0	3	0	1	0.410907	0.977741	1.02527	NS	0.319992	-2.46453	NS	0.316942	-2.51627	NS
808	Serine/threonine-protein phosphatase 2A 65 kDa regulatory subunit A alpha isoform OS=Homo sapiens GN=PPP2R1A PE=1 SV=4	sp|P30153	65 kDa	0	0	0	0	0	1	0	1	0	0	0	0	0	0	0	0	0	1	0	1	0	0	0	0	0.104385	0.29732	-3.06093	NS	1	1	NS	0.300956	3.03531	NS
809	CDGSH iron-sulfur domain-containing protein 2 OS=Homo sapiens GN=CISD2 PE=1 SV=1	sp|Q8N5K1	15 kDa	0	0	0	0	0	1	0	0	1	1	0	0	0	0	0	0	0	1	0	0	1	1	0	0	0.241582	0.622503	-1.64943	NS	0.318949	-2.92054	NS	0.661458	-1.48557	NS
810	cAMP-dependent protein kinase type II-alpha regulatory subunit OS=Homo sapiens GN=PRKAR2A PE=1 SV=2	sp|P13861	46 kDa	0	1	0	0	0	1	0	0	0	0	1	0	0	1	0	0	0	1	0	0	0	0	1	0	0.999009	0.985118	1.01682	NS	0.99385	-1.00774	NS	0.967204	1.04199	NS
811	Glycogen phosphorylase, brain form OS=Homo sapiens GN=PYGB PE=1 SV=5	sp|P11216	97 kDa	0	0	1	0	1	0	0	0	1	0	0	0	0	0	2	0	1	0	0	0	2	0	0	0	0.951174	0.720228	1.38371	NS	0.977122	-1.02498	NS	0.664568	-1.42827	NS
812	Actin-related protein 2/3 complex subunit 2 OS=Homo sapiens GN=ARPC2 PE=1 SV=1	sp|O15144	34 kDa	0	0	1	0	0	0	0	0	0	1	0	0	0	0	1	0	0	0	0	0	0	2	0	0	0.375172	0.656649	1.5729	NS	0.662316	-1.48432	NS	0.374765	-2.29248	NS
813	NSFL1 cofactor p47 OS=Homo sapiens GN=NSFL1C PE=1 SV=2	sp|Q9UNZ2	41 kDa	0	0	1	0	1	2	0	0	0	0	1	0	0	0	2	0	1	2	0	0	0	0	1	0	0.605836	0.625464	-1.5412	NS	0.735401	1.32081	NS	0.376373	2.41491	NS
814	Probable 4-hydroxy-2-oxoglutarate aldolase, mitochondrial OS=Homo sapiens GN=HOGA1 PE=1 SV=1	sp|Q86XE5	35 kDa	1	1	0	0	1	0	1	1	0	0	0	0	2	1	0	0	1	0	1	1	0	0	0	0	0.0883207	0.979498	-1.02124	NS	0.156807	4.1074	NS	0.107189	7.15509	NS
815	AP-3 complex subunit beta-1 OS=Homo sapiens GN=AP3B1 PE=1 SV=3	sp|O00203	121 kDa	0	0	0	0	0	0	2	0	0	0	0	0	0	0	0	0	0	0	2	0	0	0	0	0	0.28069	0.311022	-2.57239	NS	1	1	NS	0.336812	2.44991	NS
816	Reverse sequence, was Transmembrane and coiled-coil domain-containing protein 5B OS=Homo sapiens GN=TMCO5B PE=3 SV=1	sp|REV_A8MYB1	36 kDa	0	1	0	1	0	0	0	1	0	1	0	0	0	1	0	1	0	0	0	1	0	1	0	0	0.814769	0.685151	1.44312	NS	0.644472	1.51766	NS	0.990731	1.01169	NS
817	Carbonyl reductase family member 4 OS=Homo sapiens GN=CBR4 PE=1 SV=3	sp|Q8N4T8	25 kDa	1	0	0	1	1	0	0	0	1	1	1	0	2	0	0	1	1	0	0	0	1	1	1	0	0.549504	0.401648	2.02443	NS	0.986996	-1.01341	NS	0.374084	-2.29582	NS
818	Coatomer subunit epsilon OS=Homo sapiens GN=COPE PE=1 SV=3	sp|O14579	34 kDa	1	0	1	0	1	0	0	0	0	0	0	0	1	0	1	0	1	0	0	0	0	0	0	0	0.258182	0.671157	1.46865	NS	0.317178	2.93211	NS	0.62219	1.65016	NS
819	WW domain-binding protein 2 OS=Homo sapiens GN=WBP2 PE=1 SV=1	sp|Q969T9	28 kDa	0	1	1	0	0	0	1	0	1	1	1	0	0	2	1	0	0	0	1	0	1	1	2	0	0.393784	0.454949	1.87868	NS	0.713819	-1.29768	NS	0.23768	-2.82583	NS
820	Prefoldin subunit 5 OS=Homo sapiens GN=PFDN5 PE=1 SV=2	sp|Q99471	17 kDa	1	1	1	0	1	0	0	0	1	0	0	0	2	1	1	0	2	0	0	0	3	0	0	0	0.650186	0.439784	1.81691	NS	0.712463	1.29913	NS	0.697072	-1.31823	NS
821	Asparaginyl-tRNA synthetase, cytoplasmic OS=Homo sapiens GN=NARS PE=1 SV=1	sp|O43776	63 kDa	0	0	0	1	0	1	0	0	0	1	0	0	0	0	0	1	0	2	0	0	0	1	0	0	0.874958	0.647867	-1.51108	NS	0.993948	-1.00762	NS	0.662596	1.43146	NS
822	3-hydroxyanthranilate 3,4-dioxygenase OS=Homo sapiens GN=HAAO PE=1 SV=2	sp|P46952	33 kDa	0	0	0	0	0	0	0	0	1	0	0	0	0	0	0	0	0	0	0	0	1	0	0	0	0.332827	1	1	NS	0.619135	-1.65734	NS	0.608224	-1.68344	NS
823	N-acetyl-D-glucosamine kinase OS=Homo sapiens GN=NAGK PE=1 SV=4	sp|Q9UJ70	37 kDa	0	0	2	0	1	0	1	1	0	0	0	0	0	0	2	0	1	0	2	1	0	0	0	0	0.0638182	0.341512	-2.08223	NS	0.392037	2.22809	NS	0.0552964	9.38855	NS
824	Acidic leucine-rich nuclear phosphoprotein 32 family member B OS=Homo sapiens GN=ANP32B PE=1 SV=1	sp|Q92688	29 kDa	0	0	0	1	1	1	0	0	0	0	1	0	1	2	2	2	3	3	2	3	1	1	2	0	0.160786	0.282239	-1.67147	NS	0.394391	1.68972	NS	0.0587004	2.84654	NS
825	Protein transport protein Sec24B OS=Homo sapiens GN=SEC24B PE=1 SV=2	sp|O95487	137 kDa	0	0	1	0	0	0	0	0	0	0	0	0	0	0	2	0	0	0	2	0	0	0	0	0	0.37051	0.857967	-1.14519	NS	0.392037	2.22809	NS	0.336812	2.44991	NS
826	Protein CREG1 OS=Homo sapiens GN=CREG1 PE=1 SV=1	sp|O75629	24 kDa	0	0	0	0	0	1	1	1	0	0	1	0	0	0	0	0	0	1	1	1	0	0	1	0	0.106427	0.095489	-7.60553	NS	0.594793	-1.71666	NS	0.331702	2.47252	NS
827	Erythrocyte band 7 integral membrane protein OS=Homo sapiens GN=STOM PE=1 SV=3	sp|P27105	32 kDa	0	0	0	0	0	0	0	0	1	2	1	0	0	0	0	0	0	0	0	0	2	2	1	0	0.00658808	1	1	NS	0.0355325	-10.8388	NS	0.036471	-10.7795	NS
828	Arylsulfatase A OS=Homo sapiens GN=ARSA PE=1 SV=3	sp|P15289	54 kDa	0	0	0	0	1	0	0	0	1	1	0	0	0	0	0	0	2	0	0	0	1	1	0	0	0.1941	0.379028	-2.27621	NS	0.318949	-2.92054	NS	0.987715	-1.01265	NS
829	Fumarylacetoacetate hydrolase domain-containing protein 2A OS=Homo sapiens GN=FAHD2A PE=1 SV=1	sp|Q96GK7 (+1)	35 kDa	0	1	0	0	1	0	0	0	0	1	1	0	0	2	0	0	1	0	0	0	0	1	1	0	0.829577	0.631016	1.54449	NS	0.976985	1.02385	NS	0.636982	-1.61626	NS
830	Haloacid dehalogenase-like hydrolase domain-containing protein 3 OS=Homo sapiens GN=HDHD3 PE=1 SV=1	sp|Q9BSH5	28 kDa	0	0	0	0	0	0	0	0	0	1	0	0	0	0	0	0	0	0	0	0	0	1	0	0	0.332827	1	1	NS	0.630269	-1.63146	NS	0.622967	-1.64835	NS
831	Far upstream element-binding protein 1 OS=Homo sapiens GN=FUBP1 PE=1 SV=3	sp|Q96AE4	68 kDa	0	0	0	0	0	0	0	1	0	0	0	0	0	0	0	0	0	0	0	1	0	0	0	0	0.323091	0.594513	-1.71737	NS	1	1	NS	0.614835	1.66754	NS
832	28S ribosomal protein S18b, mitochondrial OS=Homo sapiens GN=MRPS18B PE=1 SV=1	sp|Q9Y676	29 kDa	0	1	0	0	0	0	1	1	0	0	0	0	0	1	0	0	0	0	1	1	0	0	0	0	0.242438	0.560966	-1.80542	NS	0.600172	1.70321	NS	0.292253	3.09517	NS
833	Reverse sequence, was Sterile alpha motif domain-containing protein 9-like OS=Homo sapiens GN=SAMD9L PE=1 SV=2	sp|REV_Q8IVG5	185 kDa	1	0	1	0	1	0	0	0	0	0	0	0	1	0	1	0	1	0	0	0	0	0	0	0	0.258182	0.671157	1.46865	NS	0.317178	2.93211	NS	0.62219	1.65016	NS
834	Pterin-4-alpha-carbinolamine dehydratase OS=Homo sapiens GN=PCBD1 PE=1 SV=2	sp|P61457	12 kDa	0	0	0	1	0	0	0	0	0	0	0	1	0	0	0	2	0	0	0	0	0	0	0	1	0.390713	0.392424	2.2267	NS	0.735176	1.32114	NS	0.615573	-1.66578	NS
835	ATP synthase subunit delta, mitochondrial OS=Homo sapiens GN=ATP5D PE=1 SV=2	sp|P30049	17 kDa	0	1	1	1	1	0	1	1	0	0	0	1	0	1	1	1	1	0	1	1	0	0	0	1	0.516547	0.901482	-1.10658	NS	0.395473	2.21636	NS	0.354433	2.37444	NS
836	14-3-3 protein sigma OS=Homo sapiens GN=SFN PE=1 SV=1	sp|P31947	28 kDa	1	0	1	0	1	0	0	0	0	0	0	1	6	3	6	6	6	2	2	6	4	4	4	4	0.730832	0.527886	1.2325	NS	0.483732	1.26068	NS	0.957127	1.0192	NS
837	Phosphomannomutase 2 OS=Homo sapiens GN=PMM2 PE=1 SV=1	sp|O15305	28 kDa	0	1	0	0	1	1	0	0	0	1	0	0	0	1	0	0	1	1	0	0	0	1	0	0	0.765085	0.677219	-1.45696	NS	0.969299	1.03504	NS	0.645763	1.51486	NS
838	Protein transport protein Sec61 subunit beta OS=Homo sapiens GN=SEC61B PE=1 SV=2	sp|P60468	10 kDa	1	0	1	0	0	0	1	1	0	0	1	1	1	0	1	0	0	0	1	1	0	0	1	1	0.99802	0.905736	-1.11197	NS	0.941554	-1.06782	NS	0.960214	1.04159	NS
839	60S ribosomal protein L4 OS=Homo sapiens GN=RPL4 PE=1 SV=5	sp|P36578	48 kDa	0	0	0	0	0	0	0	1	1	0	0	0	0	0	0	0	0	0	0	1	1	0	0	0	0.430138	0.594513	-1.71737	NS	0.619135	-1.65734	NS	0.992457	-1.0095	NS
840	Proteasome subunit beta type-9 OS=Homo sapiens GN=PSMB9 PE=1 SV=2	sp|P28065	23 kDa	1	0	0	0	1	1	0	0	1	1	0	1	2	0	0	0	1	2	0	0	1	1	0	1	0.844779	0.74322	-1.28282	NS	0.687803	-1.3918	NS	0.99166	1.00793	NS
841	Lysyl-tRNA synthetase OS=Homo sapiens GN=KARS PE=1 SV=3	sp|Q15046	68 kDa	1	0	1	1	0	0	0	0	1	0	0	0	1	0	1	1	0	0	0	0	1	0	0	0	0.128537	0.127411	6.53686	NS	0.386466	2.24888	NS	0.608224	-1.68344	NS
842	Programmed cell death protein 5 OS=Homo sapiens GN=PDCD5 PE=1 SV=3	sp|O14737	14 kDa	0	0	1	0	0	0	1	1	0	1	0	1	0	0	1	0	0	0	1	1	0	1	0	1	0.777111	0.560967	-1.69077	NS	0.589354	-1.73084	NS	0.969915	1.03432	NS
843	Glutaryl-CoA dehydrogenase, mitochondrial OS=Homo sapiens GN=GCDH PE=1 SV=1	sp|Q92947	48 kDa	0	1	0	0	1	0	0	0	0	0	1	0	0	1	0	0	1	0	0	0	0	0	1	0	0.999009	0.979234	1.02637	NS	0.99385	-1.00774	NS	0.984017	1.02024	NS
844	Cystathionine gamma-lyase OS=Homo sapiens GN=CTH PE=1 SV=3	sp|P32929	45 kDa	0	0	0	1	0	1	0	0	0	0	0	0	0	0	0	1	0	1	0	0	0	0	0	0	0.44467	0.984684	-1.01939	NS	0.63559	1.61934	NS	0.607449	1.68532	NS
845	Alpha-soluble NSF attachment protein OS=Homo sapiens GN=NAPA PE=1 SV=3	sp|P54920	33 kDa	0	1	1	0	0	1	0	0	0	0	0	0	0	1	1	0	0	1	0	0	0	0	0	0	0.258182	0.677946	1.45634	NS	0.309593	2.98078	NS	0.607449	1.68532	NS
846	Acyl-CoA dehydrogenase family member 11 OS=Homo sapiens GN=ACAD11 PE=1 SV=2	sp|Q709F0	87 kDa	0	0	0	1	0	0	0	0	0	0	0	0	0	0	0	1	0	0	0	0	0	0	0	0	0.344071	0.635958	1.61851	NS	0.63559	1.61934	NS	1	1	NS
847	Heterogeneous nuclear ribonucleoprotein Q OS=Homo sapiens GN=SYNCRIP PE=1 SV=2	sp|O60506	70 kDa	0	0	1	0	1	0	0	1	1	1	0	0	0	0	1	0	1	0	0	1	1	1	0	0	0.777111	0.564386	-1.79641	NS	0.613505	-1.67128	NS	0.994046	-1.0067	NS
848	Putative tropomyosin alpha-3 chain-like protein OS=Homo sapiens PE=5 SV=2	sp|A6NL28	26 kDa	1	1	1	1	0	1	0	0	0	0	1	1	1	1	1	2	0	1	0	0	0	0	2	1	0.264732	0.10005	4.7529	NS	0.543591	1.54885	NS	0.415999	-2.2045	NS
849	FUN14 domain-containing protein 2 OS=Homo sapiens GN=FUNDC2 PE=1 SV=2	sp|Q9BWH2	21 kDa	0	0	0	1	0	0	0	0	0	0	1	1	0	0	0	1	0	0	0	0	0	0	1	1	0.25727	0.635958	1.61851	NS	0.598249	-1.6093	NS	0.320486	-2.9116	NS
850	HLA class I histocompatibility antigen, B-53 alpha chain OS=Homo sapiens GN=HLA-B PE=1 SV=1	sp|P30491 (+12)	40 kDa	0	1	0	0	1	1	0	0	1	0	0	0	0	1	0	0	1	1	0	0	1	0	0	0	0.765085	0.677219	-1.45696	NS	0.978353	1.02751	NS	0.659311	1.48953	NS
851	Calcium-regulated heat stable protein 1 OS=Homo sapiens GN=CARHSP1 PE=1 SV=2	sp|Q9Y2V2	16 kDa	0	1	0	0	0	0	0	0	0	0	0	0	0	1	0	0	0	0	0	0	0	0	0	0	0.344071	0.607912	1.6842	NS	0.600172	1.70321	NS	1	1	NS
852	Tight junction protein ZO-2 OS=Homo sapiens GN=TJP2 PE=1 SV=2	sp|Q9UDY2	134 kDa	0	1	0	1	0	1	1	0	0	0	0	0	0	1	0	1	0	1	1	0	0	0	0	0	0.197727	0.95158	-1.0559	NS	0.309537	2.98112	NS	0.287552	3.12784	NS
853	Cytoplasmic dynein 1 light intermediate chain 1 OS=Homo sapiens GN=DYNC1LI1 PE=1 SV=3	sp|Q9Y6G9	57 kDa	0	0	0	0	1	1	1	0	1	0	1	0	0	0	0	0	2	1	1	0	1	0	1	0	0.0554101	0.0565491	-9.17658	NS	0.295359	-3.074	NS	0.428027	1.84408	NS
854	ATP-binding cassette sub-family F member 1 OS=Homo sapiens GN=ABCF1 PE=1 SV=2	sp|Q8NE71	96 kDa	0	1	1	0	0	0	0	0	1	1	1	0	0	1	2	0	0	0	0	0	1	1	1	0	0.0965488	0.194371	3.68531	NS	0.976453	-1.02259	NS	0.118239	-6.7941	NS
855	Glycolipid transfer protein OS=Homo sapiens GN=GLTP PE=1 SV=3	sp|Q9NZD2	24 kDa	0	1	0	0	0	0	0	0	1	1	0	1	0	1	0	0	0	0	0	0	1	1	0	2	0.0522094	0.607912	1.6842	NS	0.207102	-3.02452	NS	0.0589614	-8.98672	NS
856	Target of Myb protein 1 OS=Homo sapiens GN=TOM1 PE=1 SV=2	sp|O60784	54 kDa	1	0	0	1	0	0	1	0	1	1	0	0	2	0	0	2	0	0	1	0	1	1	0	0	0.407464	0.314254	2.46721	NS	0.455183	1.78096	NS	0.636982	-1.61626	NS
857	Ketohexokinase OS=Homo sapiens GN=KHK PE=1 SV=1	sp|P50053	33 kDa	1	0	0	0	1	0	0	0	1	1	0	1	1	0	0	0	1	0	0	0	2	2	0	1	0.121255	0.977741	1.02527	NS	0.124298	-3.60679	NS	0.117735	-3.68312	NS
858	Actin-related protein 2/3 complex subunit 5-like protein OS=Homo sapiens GN=ARPC5L PE=1 SV=1	sp|Q9BPX5	17 kDa	1	0	0	0	0	0	0	0	0	1	0	0	1	0	0	0	0	0	0	0	0	1	0	0	0.45807	0.604302	1.69302	NS	0.978353	1.02751	NS	0.622967	-1.64835	NS
859	Acid ceramidase OS=Homo sapiens GN=ASAH1 PE=1 SV=5	sp|Q13510	45 kDa	0	0	1	0	1	0	0	0	0	0	1	0	0	0	1	0	2	0	0	0	0	0	1	0	0.789559	0.635317	-1.53577	NS	0.958298	-1.0479	NS	0.647045	1.51263	NS
860	Golgi resident protein GCP60 OS=Homo sapiens GN=ACBD3 PE=1 SV=4	sp|Q9H3P7	61 kDa	0	0	1	0	1	1	1	1	1	1	0	0	0	0	1	0	1	1	1	1	1	1	0	0	0.334015	0.134455	-4.43321	NS	0.613505	-1.67128	NS	0.39466	2.04525	NS
861	Maleylacetoacetate isomerase OS=Homo sapiens GN=GSTZ1 PE=1 SV=3	sp|O43708	24 kDa	0	0	2	0	0	0	0	1	0	0	1	0	0	0	2	0	0	0	0	1	0	0	1	0	0.861014	0.750826	1.33374	NS	0.735401	1.32081	NS	0.975632	1.03103	NS
862	Voltage-dependent anion-selective channel protein 2 OS=Homo sapiens GN=VDAC2 PE=1 SV=2	sp|P45880	32 kDa	0	0	1	0	0	0	1	1	1	1	0	0	0	0	1	0	0	0	1	1	1	1	0	0	0.777111	0.560967	-1.69077	NS	0.613505	-1.67128	NS	0.978832	1.02689	NS
863	28S ribosomal protein S16, mitochondrial OS=Homo sapiens GN=MRPS16 PE=1 SV=1	sp|Q9Y3D3	15 kDa	1	0	0	1	0	1	1	1	0	1	1	0	1	0	0	1	0	1	1	2	0	1	1	0	0.587621	0.35534	-2.17367	NS	0.975099	-1.03174	NS	0.409933	1.88842	NS
864	Cytidine deaminase OS=Homo sapiens GN=CDA PE=1 SV=2	sp|P32320	16 kDa	1	0	1	0	0	1	0	1	0	0	0	0	1	0	1	0	0	1	0	1	0	0	0	0	0.197727	0.949969	-1.06489	NS	0.317178	2.93211	NS	0.300956	3.03531	NS
865	Alanine aminotransferase 1 OS=Homo sapiens GN=GPT PE=1 SV=3	sp|P24298	55 kDa	0	0	0	1	0	0	0	1	0	1	0	0	0	0	0	1	0	0	0	1	0	1	0	0	0.999009	0.957724	-1.04858	NS	0.993948	-1.00762	NS	0.990731	1.01169	NS
866	Ran-specific GTPase-activating protein OS=Homo sapiens GN=RANBP1 PE=1 SV=1	sp|P43487	23 kDa	1	0	0	0	1	0	0	0	0	1	0	0	1	0	0	0	1	0	0	0	0	1	0	0	0.999009	0.977741	1.02527	NS	0.978353	1.02751	NS	0.999118	1.00111	NS
867	Fibrinogen gamma chain OS=Homo sapiens GN=FGG PE=1 SV=3	sp|P02679	52 kDa	1	0	0	1	1	1	0	1	1	0	1	0	1	0	0	1	1	1	0	1	1	0	2	0	0.848053	0.67166	-1.41728	NS	0.637187	-1.47368	NS	0.966323	1.0351	NS
868	Non-POU domain-containing octamer-binding protein OS=Homo sapiens GN=NONO PE=1 SV=4	sp|Q15233	54 kDa	1	1	0	1	0	0	0	0	0	0	0	1	1	1	0	1	0	0	0	0	0	0	0	1	0.128537	0.112201	6.98731	NS	0.378645	2.27889	NS	0.615573	-1.66578	NS
869	Phosphoribosylformylglycinamidine synthase OS=Homo sapiens GN=PFAS PE=1 SV=4	sp|O15067	145 kDa	0	0	2	0	0	0	1	0	0	0	0	0	0	0	2	0	0	0	1	0	0	0	0	0	0.362829	0.790688	1.24489	NS	0.392037	2.22809	NS	0.594241	1.71806	NS
870	Sodium/potassium-transporting ATPase subunit alpha-3 OS=Homo sapiens GN=ATP1A3 PE=1 SV=3	sp|P13637 (+3)	112 kDa	0	0	0	0	0	1	0	0	1	1	1	1	0	0	0	0	0	1	0	0	1	1	1	1	0.0483915	0.622503	-1.64943	NS	0.0174023	-94215.6	NS	0.176421	-3.86871	NS
871	Methylmalonyl-CoA epimerase, mitochondrial OS=Homo sapiens GN=MCEE PE=1 SV=1	sp|Q96PE7	19 kDa	0	0	1	1	0	0	1	0	0	0	0	1	0	0	1	1	0	0	1	0	0	0	0	1	0.81477	0.750825	1.33374	NS	0.710654	1.39903	NS	0.975631	1.03103	NS
872	Hypoxanthine-guanine phosphoribosyltransferase OS=Homo sapiens GN=HPRT1 PE=1 SV=2	sp|P00492	25 kDa	1	0	0	0	1	0	0	0	0	1	0	0	1	0	0	0	1	0	0	0	0	1	0	0	0.999009	0.977741	1.02527	NS	0.978353	1.02751	NS	0.999118	1.00111	NS
873	Metallothionein-1G OS=Homo sapiens GN=MT1G PE=1 SV=2	sp|P13640 (+4)	6 kDa	1	0	1	0	0	0	1	0	1	0	0	0	1	0	2	0	0	0	1	0	1	0	0	0	0.510775	0.486839	1.8	NS	0.431532	1.93918	NS	0.984017	1.02025	NS
874	Shootin-1 OS=Homo sapiens GN=KIAA1598 PE=1 SV=4	sp|A0MZ66	72 kDa	0	0	1	0	1	0	0	1	0	0	1	0	0	0	1	0	1	0	0	1	0	0	1	0	0.765085	0.564386	-1.79641	NS	0.958298	-1.0479	NS	0.600734	1.70207	NS
875	Acyl-protein thioesterase 2 OS=Homo sapiens GN=LYPLA2 PE=1 SV=1	sp|O95372	25 kDa	1	0	1	0	0	0	0	0	0	0	1	0	1	0	1	0	0	0	0	0	0	0	2	0	0.220445	0.326068	2.88123	NS	0.946567	-1.05628	NS	0.392799	-2.22535	NS
876	Thymidylate kinase OS=Homo sapiens GN=DTYMK PE=1 SV=4	sp|P23919	24 kDa	0	0	0	1	0	0	0	0	0	0	1	0	0	0	0	1	0	0	0	0	0	0	2	0	0.375897	0.635958	1.61851	NS	0.604953	-1.60946	NS	0.392799	-2.22535	NS
877	Tetratricopeptide repeat protein 37 OS=Homo sapiens GN=TTC37 PE=1 SV=1	sp|Q6PGP7	175 kDa	0	0	2	0	0	0	0	0	0	0	2	0	0	0	2	0	0	0	0	0	0	0	2	0	0.374523	0.421167	2.12791	NS	0.929558	-1.06915	NS	0.392799	-2.22535	NS
878	Peroxisomal 2,4-dienoyl-CoA reductase OS=Homo sapiens GN=DECR2 PE=1 SV=1	sp|Q9NUI1	31 kDa	0	0	0	0	0	0	0	0	0	0	1	0	0	0	0	0	0	0	0	0	0	0	1	0	0.332827	1	1	NS	0.594793	-1.71666	NS	0.636232	-1.61789	NS
879	Dimethylaniline monooxygenase [N-oxide-forming] 3 OS=Homo sapiens GN=FMO3 PE=1 SV=5	sp|P31513	60 kDa	0	0	0	0	0	0	0	0	1	0	1	0	0	0	0	0	0	0	0	0	1	0	1	0	0.110771	1	1	NS	0.295359	-3.074	NS	0.315457	-2.94305	NS
880	Phenazine biosynthesis-like domain-containing protein OS=Homo sapiens GN=PBLD PE=1 SV=2	sp|P30039	32 kDa	0	0	0	0	1	0	0	0	0	0	0	0	0	0	0	0	1	0	0	0	0	0	0	0	0.323091	0.626124	-1.641	NS	1	1	NS	0.62219	1.65016	NS
881	UPF0568 protein C14orf166 OS=Homo sapiens GN=C14orf166 PE=1 SV=1	sp|Q9Y224	28 kDa	0	0	0	0	1	1	0	0	0	0	0	0	0	0	0	0	1	1	0	0	0	0	0	0	0.104385	0.318456	-2.92341	NS	1	1	NS	0.305754	3.00397	NS
882	Olfactory receptor 13C4 OS=Homo sapiens GN=OR13C4 PE=2 SV=1	sp|Q8NGS5	36 kDa	0	0	0	1	0	1	0	0	0	0	0	0	0	0	0	1	0	1	0	0	0	0	0	0	0.44467	0.984684	-1.01939	NS	0.63559	1.61934	NS	0.607449	1.68532	NS
883	Glutaminase kidney isoform, mitochondrial OS=Homo sapiens GN=GLS PE=1 SV=1	sp|O94925	73 kDa	1	0	0	0	1	0	0	1	0	0	0	0	1	0	0	0	1	0	0	1	0	0	0	0	0.242438	0.654471	-1.49876	NS	0.611275	1.67607	NS	0.31069	2.97197	NS
884	Estradiol 17-beta-dehydrogenase 8 OS=Homo sapiens GN=HSD17B8 PE=1 SV=2	sp|Q92506	27 kDa	0	0	0	1	0	0	0	0	0	0	0	0	0	0	0	1	0	0	0	0	0	0	0	0	0.344071	0.635958	1.61851	NS	0.63559	1.61934	NS	1	1	NS
885	2-methoxy-6-polyprenyl-1,4-benzoquinol methylase, mitochondrial OS=Homo sapiens GN=COQ5 PE=1 SV=2	sp|Q5HYK3	37 kDa	0	1	0	0	0	1	1	0	1	1	1	1	0	1	0	0	0	1	1	0	1	1	1	1	0.354451	0.628803	-1.54835	NS	0.162092	-4.04143	NS	0.443741	-1.90629	NS
886	Aspartyl/asparaginyl beta-hydroxylase OS=Homo sapiens GN=ASPH PE=1 SV=3	sp|Q12797	86 kDa	1	1	0	1	1	1	0	0	0	0	0	0	1	1	0	1	1	1	0	0	0	0	0	0	0.12303	0.668879	1.42158	NS	0.111835	6.99998	NS	0.305754	3.00397	NS
887	Tax1-binding protein 3 OS=Homo sapiens GN=TAX1BP3 PE=1 SV=2	sp|O14907	14 kDa	0	0	1	1	0	1	1	1	0	0	0	0	0	0	2	1	0	1	1	1	0	0	0	0	0.0883207	0.864094	-1.1384	NS	0.189087	3.73281	NS	0.102962	7.3042	NS
888	Ethanolamine-phosphate cytidylyltransferase OS=Homo sapiens GN=PCYT2 PE=1 SV=1	sp|Q99447	44 kDa	0	0	0	1	0	0	0	0	0	0	0	0	0	0	0	1	0	0	0	0	0	0	0	0	0.344071	0.635958	1.61851	NS	0.63559	1.61934	NS	1	1	NS
889	Neurocalcin-delta OS=Homo sapiens GN=NCALD PE=2 SV=2	sp|P61601	22 kDa	0	0	1	0	1	0	0	0	0	0	0	1	2	1	1	3	3	2	0	1	0	0	1	3	0.669348	0.810359	1.14281	NS	0.429009	1.62809	NS	0.508788	1.65072	NS
890	Basic leucine zipper and W2 domain-containing protein 1 OS=Homo sapiens GN=BZW1 PE=1 SV=1	sp|Q7L1Q6	48 kDa	0	0	0	0	0	0	0	0	1	0	0	1	0	0	0	0	0	0	0	0	1	0	0	1	0.110771	1	1	NS	0.295416	-3.0736	NS	0.301949	-3.02871	NS
891	Uncharacterized protein C9orf142 OS=Homo sapiens GN=C9orf142 PE=1 SV=2	sp|Q9BUH6	22 kDa	0	1	1	1	0	0	0	0	0	0	1	0	0	1	1	1	0	0	0	0	0	0	1	0	0.128537	0.128685	6.49983	NS	0.395532	2.21614	NS	0.636232	-1.61789	NS
892	D-3-phosphoglycerate dehydrogenase OS=Homo sapiens GN=PHGDH PE=1 SV=4	sp|O43175	57 kDa	0	0	0	0	0	0	1	0	1	1	0	0	0	0	0	0	0	0	1	0	1	1	0	0	0.241582	0.574011	-1.77065	NS	0.318949	-2.92054	NS	0.636982	-1.61626	NS
893	V-type proton ATPase catalytic subunit A OS=Homo sapiens GN=ATP6V1A PE=1 SV=2	sp|P38606	68 kDa	0	0	0	1	0	0	0	0	0	0	0	0	0	0	0	1	0	0	0	0	0	0	0	0	0.344071	0.635958	1.61851	NS	0.63559	1.61934	NS	1	1	NS
894	T-complex protein 1 subunit alpha OS=Homo sapiens GN=TCP1 PE=1 SV=1	sp|P17987	60 kDa	0	0	0	0	0	0	0	0	0	0	1	0	0	0	0	0	0	0	0	0	0	0	1	0	0.332827	1	1	NS	0.594793	-1.71666	NS	0.636232	-1.61789	NS
895	NHP2-like protein 1 OS=Homo sapiens GN=NHP2L1 PE=1 SV=3	sp|P55769	14 kDa	0	0	1	0	1	0	0	0	1	0	2	0	0	0	1	0	1	0	0	0	1	0	2	0	0.478092	0.965307	-1.04454	NS	0.372821	-2.11393	NS	0.428106	-1.94872	NS
896	ATP-dependent RNA helicase DDX19A OS=Homo sapiens GN=DDX19A PE=1 SV=1	sp|Q9NUU7 (+1)	54 kDa	0	0	0	0	0	1	0	0	1	1	0	0	0	0	0	0	0	1	0	0	1	2	0	0	0.126584	0.622503	-1.64943	NS	0.178123	-3.84899	NS	0.420454	-1.96949	NS
897	Carnitine O-palmitoyltransferase 2, mitochondrial OS=Homo sapiens GN=CPT2 PE=1 SV=2	sp|P23786	74 kDa	0	0	0	1	0	0	0	0	0	0	0	0	0	0	0	1	0	0	0	0	0	0	0	0	0.344071	0.635958	1.61851	NS	0.63559	1.61934	NS	1	1	NS
898	Oxidoreductase HTATIP2 OS=Homo sapiens GN=HTATIP2 PE=1 SV=2	sp|Q9BUP3	27 kDa	0	1	0	1	1	0	0	0	0	0	0	0	0	1	0	1	1	0	0	0	0	0	0	0	0.258182	0.617504	1.66169	NS	0.309537	2.98112	NS	0.62219	1.65016	NS
899	Gephyrin OS=Homo sapiens GN=GPHN PE=1 SV=1	sp|Q9NQX3	80 kDa	1	0	0	0	0	0	0	0	1	1	1	0	1	0	0	0	0	0	0	0	1	1	1	0	0.120272	0.604302	1.69302	NS	0.365747	-2.32881	NS	0.118239	-6.7941	NS
900	Copine-3 OS=Homo sapiens GN=CPNE3 PE=1 SV=1	sp|O75131	60 kDa	0	0	0	0	0	0	1	0	0	1	0	0	0	0	0	0	0	0	1	0	0	1	0	0	0.430138	0.574011	-1.77065	NS	0.630269	-1.63146	NS	0.967204	1.04199	NS
901	Pirin OS=Homo sapiens GN=PIR PE=1 SV=1	sp|O00625	32 kDa	0	0	0	0	1	0	0	0	0	1	0	0	0	0	0	0	1	0	0	0	0	2	0	0	0.356788	0.626124	-1.641	NS	0.384653	-2.25512	NS	0.661458	-1.48557	NS
902	Fibrinogen alpha chain OS=Homo sapiens GN=FGA PE=1 SV=2	sp|P02671	95 kDa	0	0	0	0	0	0	1	0	0	0	0	1	0	0	0	0	0	0	1	0	0	0	0	1	0.430138	0.574011	-1.77065	NS	0.594879	-1.71644	NS	0.975631	1.03103	NS
903	Echinoderm microtubule-associated protein-like 4 OS=Homo sapiens GN=EML4 PE=1 SV=3	sp|Q9HC35	109 kDa	0	0	1	0	0	0	0	0	0	0	0	0	0	0	1	0	0	0	0	0	0	0	0	0	0.344071	0.656649	1.5729	NS	0.635676	1.61915	NS	1	1	NS
904	BRISC and BRCA1-A complex member 1 OS=Homo sapiens GN=BABAM1 PE=1 SV=1	sp|Q9NWV8	37 kDa	0	0	1	1	0	0	0	0	1	0	1	0	0	0	2	2	0	0	0	0	1	0	1	0	0.0741618	0.119538	4.45463	NS	0.511636	1.66201	NS	0.315457	-2.94305	NS
905	26S protease regulatory subunit 6B OS=Homo sapiens GN=PSMC4 PE=1 SV=2	sp|P43686	47 kDa	0	1	0	0	0	1	0	0	0	0	0	0	0	1	0	0	0	1	0	0	0	0	0	0	0.44467	0.985118	1.01682	NS	0.600172	1.70321	NS	0.607449	1.68532	NS
906	Serine dehydratase-like OS=Homo sapiens GN=SDSL PE=1 SV=1	sp|Q96GA7	35 kDa	1	0	0	0	0	1	0	0	1	1	0	0	2	0	0	0	0	1	0	0	1	3	0	0	0.599446	0.629618	1.55092	NS	0.533282	-1.59435	NS	0.259714	-2.45183	NS
907	Guanine nucleotide-binding protein G(s) subunit alpha isoforms short OS=Homo sapiens GN=GNAS PE=1 SV=1	sp|P63092 (+1)	46 kDa	0	0	0	0	0	0	0	0	0	0	0	1	0	0	0	0	0	0	0	0	0	0	0	1	0.332827	1	1	NS	0.594879	-1.71644	NS	0.615573	-1.66578	NS
908	Thymidine phosphorylase OS=Homo sapiens GN=TYMP PE=1 SV=2	sp|P19971	50 kDa	0	0	0	0	0	0	0	1	0	0	0	0	0	0	0	0	0	0	0	1	0	0	0	0	0.323091	0.594513	-1.71737	NS	1	1	NS	0.614835	1.66754	NS
909	L antigen family member 3 OS=Homo sapiens GN=LAGE3 PE=1 SV=2	sp|Q14657	15 kDa	0	0	0	1	0	0	0	0	0	0	0	0	0	0	0	1	0	0	0	0	0	0	0	0	0.344071	0.635958	1.61851	NS	0.63559	1.61934	NS	1	1	NS
910	Reverse sequence, was Tyrosyl-DNA phosphodiesterase 1 OS=Homo sapiens GN=TDP1 PE=1 SV=2	sp|REV_Q9NUW8	68 kDa	0	0	0	0	0	0	0	0	0	1	0	1	0	0	0	0	0	0	0	0	0	1	0	1	0.110771	1	1	NS	0.302525	-3.02678	NS	0.311697	-2.96558	NS
911	Vesicular integral-membrane protein VIP36 OS=Homo sapiens GN=LMAN2 PE=1 SV=1	sp|Q12907	40 kDa	0	0	0	0	0	0	0	0	0	1	0	1	0	0	0	0	0	0	0	0	0	2	0	1	0.0637654	1	1	NS	0.168456	-3.96224	NS	0.171071	-3.92846	NS
912	Adenylate kinase isoenzyme 4, mitochondrial OS=Homo sapiens GN=AK4 PE=1 SV=1	sp|P27144	25 kDa	1	0	0	0	0	0	0	0	0	0	0	0	1	0	0	0	0	0	0	0	0	0	0	0	0.344071	0.604302	1.69302	NS	0.611275	1.67607	NS	1	1	NS
913	Phosphotriesterase-related protein OS=Homo sapiens GN=PTER PE=1 SV=1	sp|Q96BW5	39 kDa	1	1	0	0	0	1	0	0	1	0	0	0	1	1	0	0	0	1	0	0	1	0	0	0	0.814769	0.630327	1.54449	NS	0.632664	1.53998	NS	0.999118	1.00111	NS
914	U6 snRNA-associated Sm-like protein LSm2 OS=Homo sapiens GN=LSM2 PE=1 SV=1	sp|Q9Y333	11 kDa	0	0	0	0	0	0	0	0	0	0	0	1	0	0	0	0	0	0	0	0	0	0	0	1	0.332827	1	1	NS	0.594879	-1.71644	NS	0.615573	-1.66578	NS
915	DNA damage-binding protein 1 OS=Homo sapiens GN=DDB1 PE=1 SV=1	sp|Q16531	127 kDa	0	0	0	0	0	0	0	0	0	0	1	0	0	0	0	0	0	0	0	0	0	0	1	0	0.332827	1	1	NS	0.594793	-1.71666	NS	0.636232	-1.61789	NS
916	Inverted formin-2 OS=Homo sapiens GN=INF2 PE=1 SV=2	sp|Q27J81	136 kDa	0	0	1	0	0	0	0	0	0	0	0	0	0	0	1	0	0	0	0	0	0	0	0	0	0.344071	0.656649	1.5729	NS	0.635676	1.61915	NS	1	1	NS
917	Pyruvate dehydrogenase E1 component subunit beta, mitochondrial OS=Homo sapiens GN=PDHB PE=1 SV=3	sp|P11177	39 kDa	0	0	1	1	0	1	0	0	0	0	2	0	0	0	2	1	0	1	0	0	0	0	2	0	0.665465	0.430997	2.09538	NS	0.78827	1.22675	NS	0.699875	-1.41738	NS
918	RNA-binding protein FUS OS=Homo sapiens GN=FUS PE=1 SV=1	sp|P35637	53 kDa	0	0	0	0	0	1	0	0	1	1	0	0	0	0	0	0	0	1	0	0	1	1	0	0	0.241582	0.622503	-1.64943	NS	0.318949	-2.92054	NS	0.661458	-1.48557	NS
919	Angiotensinogen OS=Homo sapiens GN=AGT PE=1 SV=1	sp|P01019	53 kDa	0	0	0	0	0	0	1	0	0	1	0	0	0	0	0	0	0	0	1	0	0	1	0	0	0.430138	0.574011	-1.77065	NS	0.630269	-1.63146	NS	0.967204	1.04199	NS
920	Dipeptidyl peptidase 1 OS=Homo sapiens GN=CTSC PE=1 SV=2	sp|P53634	52 kDa	0	0	0	1	0	0	1	0	0	0	0	0	0	0	0	1	0	0	1	0	0	0	0	0	0.44467	0.92925	-1.09298	NS	0.63559	1.61934	NS	0.594241	1.71806	NS
921	Isoamyl acetate-hydrolyzing esterase 1 homolog OS=Homo sapiens GN=IAH1 PE=1 SV=1	sp|Q2TAA2	28 kDa	0	0	1	0	1	0	0	0	0	0	0	0	0	0	1	0	1	0	0	0	0	0	0	0	0.44467	0.965307	-1.04454	NS	0.635676	1.61915	NS	0.62219	1.65016	NS
922	NADH-cytochrome b5 reductase 3 OS=Homo sapiens GN=CYB5R3 PE=1 SV=3	sp|P00387	34 kDa	0	0	0	0	0	1	0	1	0	0	0	0	0	0	0	0	0	1	0	1	0	0	0	0	0.104385	0.29732	-3.06093	NS	1	1	NS	0.300956	3.03531	NS
923	Microsomal glutathione S-transferase 3 OS=Homo sapiens GN=MGST3 PE=1 SV=1	sp|O14880	17 kDa	0	0	0	1	0	0	0	0	0	1	1	1	0	0	0	1	0	0	0	0	0	2	1	1	0.0520665	0.635958	1.61851	NS	0.19718	-3.09673	NS	0.0632454	-8.63431	NS
924	Copine-1 OS=Homo sapiens GN=CPNE1 PE=1 SV=1	sp|Q99829	59 kDa	0	0	0	0	0	1	0	0	0	0	0	0	0	0	0	0	0	1	0	0	0	0	0	0	0.323091	0.622503	-1.64943	NS	1	1	NS	0.607449	1.68532	NS
925	F-actin-capping protein subunit alpha-2 OS=Homo sapiens GN=CAPZA2 PE=1 SV=3	sp|P47755	33 kDa	0	0	1	0	1	0	0	0	0	1	1	0	0	0	2	0	2	1	0	0	0	1	1	0	0.843639	0.627339	-1.53762	NS	0.956894	-1.04516	NS	0.663109	1.4308	NS
926	Protein S100-A9 OS=Homo sapiens GN=S100A9 PE=1 SV=1	sp|P06702	13 kDa	1	1	1	1	0	0	0	0	0	0	0	0	2	1	2	1	0	0	0	0	0	0	0	0	0.00177586	0.00649645	94917.2	0.0129929	0.00600644	94988.1	0.0180193	1	1	NS	+
927	Beta-2-microglobulin OS=Homo sapiens GN=B2M PE=1 SV=1	sp|P61769	14 kDa	0	0	0	0	0	0	1	0	0	0	0	1	0	0	0	0	0	0	1	0	0	0	0	1	0.430138	0.574011	-1.77065	NS	0.594879	-1.71644	NS	0.975631	1.03103	NS
928	Serine-threonine kinase receptor-associated protein OS=Homo sapiens GN=STRAP PE=1 SV=1	sp|Q9Y3F4	38 kDa	0	1	0	0	0	0	0	0	0	1	0	0	0	1	0	0	0	0	0	0	0	2	0	0	0.389464	0.607912	1.6842	NS	0.721305	-1.3412	NS	0.374765	-2.29248	NS
929	Acyl-CoA synthetase short-chain family member 3, mitochondrial OS=Homo sapiens GN=ACSS3 PE=2 SV=1	sp|Q9H6R3	75 kDa	0	0	1	0	0	0	1	0	0	0	0	0	0	0	1	0	0	0	1	0	0	0	0	0	0.44467	0.915734	-1.09946	NS	0.635676	1.61915	NS	0.594241	1.71806	NS
930	Calponin-2 OS=Homo sapiens GN=CNN2 PE=1 SV=4	sp|Q99439	34 kDa	0	0	0	0	1	1	1	0	0	0	1	0	0	1	2	1	1	2	1	0	0	1	1	1	0.909169	0.90981	-1.0836	NS	0.778191	1.22174	NS	0.658446	1.39911	NS
931	WD repeat-containing protein 61 OS=Homo sapiens GN=WDR61 PE=1 SV=1	sp|Q9GZS3	34 kDa	0	1	1	0	0	0	1	1	0	0	0	0	0	1	1	0	0	0	1	1	0	0	0	0	0.197727	0.902076	-1.11657	NS	0.309593	2.98078	NS	0.292253	3.09517	NS
932	Poly [ADP-ribose] polymerase 1 OS=Homo sapiens GN=PARP1 PE=1 SV=4	sp|P09874	113 kDa	0	0	0	0	0	0	0	2	0	0	0	0	0	0	0	0	0	0	0	2	0	0	0	0	0.282484	0.337164	-2.44833	NS	1	1	NS	0.363867	2.33528	NS
933	AP-1 complex subunit gamma-1 OS=Homo sapiens GN=AP1G1 PE=1 SV=5	sp|O43747	91 kDa	0	0	0	0	0	0	0	0	1	0	0	0	0	0	0	0	0	0	0	0	1	0	0	0	0.332827	1	1	NS	0.619135	-1.65734	NS	0.608224	-1.68344	NS
934	DCN1-like protein 1 OS=Homo sapiens GN=DCUN1D1 PE=1 SV=1	sp|Q96GG9	30 kDa	1	0	0	0	1	0	0	0	1	0	0	0	1	0	0	0	1	0	0	0	1	0	0	0	0.999009	0.977741	1.02527	NS	0.991985	1.00903	NS	0.985756	-1.0161	NS
935	Eukaryotic translation initiation factor 5 OS=Homo sapiens GN=EIF5 PE=1 SV=2	sp|P55010	49 kDa	1	0	0	0	0	0	0	0	1	0	0	0	1	0	0	0	0	0	0	0	1	0	0	0	0.45807	0.604302	1.69302	NS	0.991985	1.00903	NS	0.608224	-1.68344	NS
936	Isochorismatase domain-containing protein 1 OS=Homo sapiens GN=ISOC1 PE=1 SV=3	sp|Q96CN7	32 kDa	0	0	0	0	0	0	0	0	1	0	0	0	0	0	0	0	0	0	0	0	1	0	0	0	0.332827	1	1	NS	0.619135	-1.65734	NS	0.608224	-1.68344	NS
937	Replication protein A 32 kDa subunit OS=Homo sapiens GN=RPA2 PE=1 SV=1	sp|P15927	29 kDa	0	0	0	0	0	0	1	0	1	0	0	0	0	0	0	0	0	0	1	0	1	0	0	0	0.430138	0.574011	-1.77065	NS	0.619135	-1.65734	NS	0.984017	1.02025	NS
938	Protein NDRG1 OS=Homo sapiens GN=NDRG1 PE=1 SV=1	sp|Q92597	43 kDa	0	1	1	0	0	0	0	0	0	0	0	0	0	1	1	0	0	0	0	0	0	0	0	0	0.118383	0.328621	2.86564	NS	0.309593	2.98078	NS	1	1	NS
939	Reverse sequence, was Arginine/serine-rich protein PNISR OS=Homo sapiens GN=PNISR PE=1 SV=2	sp|REV_Q8TF01	93 kDa	0	0	0	0	0	0	0	0	0	1	0	1	0	0	0	0	0	0	0	0	0	1	0	1	0.110771	1	1	NS	0.302525	-3.02678	NS	0.311697	-2.96558	NS
940	Death-associated protein kinase 1 OS=Homo sapiens GN=DAPK1 PE=1 SV=6	sp|P53355	160 kDa	0	0	0	0	0	0	0	0	0	1	0	0	0	0	0	0	0	0	0	0	0	1	0	0	0.332827	1	1	NS	0.630269	-1.63146	NS	0.622967	-1.64835	NS
941	Tumor necrosis factor alpha-induced protein 8 OS=Homo sapiens GN=TNFAIP8 PE=2 SV=1	sp|O95379	23 kDa	0	0	0	0	0	0	0	0	0	1	0	0	0	0	0	0	0	0	0	0	0	1	0	0	0.332827	1	1	NS	0.630269	-1.63146	NS	0.622967	-1.64835	NS
942	UPF0366 protein C11orf67 OS=Homo sapiens GN=C11orf67 PE=1 SV=1	sp|Q9H7C9	13 kDa	1	1	0	0	0	1	0	1	0	0	0	1	1	1	0	0	0	1	0	1	0	0	0	1	0.803366	0.995121	1.00549	NS	0.616343	1.6645	NS	0.645827	1.51469	NS
943	Pyridoxal phosphate phosphatase OS=Homo sapiens GN=PDXP PE=1 SV=2	sp|Q96GD0	32 kDa	1	1	0	1	1	0	0	0	1	1	0	0	1	1	0	1	1	0	0	0	1	1	0	0	0.629806	0.358516	2.35802	NS	0.667235	1.42426	NS	0.647896	-1.51083	NS
944	Cleavage and polyadenylation specificity factor subunit 5 OS=Homo sapiens GN=NUDT21 PE=1 SV=1	sp|O43809	26 kDa	0	1	0	0	0	0	0	1	0	1	0	0	0	1	0	0	0	0	0	1	0	1	0	0	0.999009	0.984684	-1.01939	NS	0.969299	1.03504	NS	0.990731	1.01169	NS
945	Microtubule-associated protein RP/EB family member 1 OS=Homo sapiens GN=MAPRE1 PE=1 SV=3	sp|Q15691	30 kDa	0	0	0	0	0	0	0	0	1	0	0	0	0	0	0	0	0	0	0	0	1	0	0	0	0.332827	1	1	NS	0.619135	-1.65734	NS	0.608224	-1.68344	NS
946	Inosine-5'-monophosphate dehydrogenase 2 OS=Homo sapiens GN=IMPDH2 PE=1 SV=2	sp|P12268	56 kDa	0	0	1	1	0	0	0	0	0	0	0	0	0	0	1	1	0	0	0	0	0	0	0	0	0.118383	0.348491	2.75131	NS	0.333829	2.83226	NS	1	1	NS
947	Barrier-to-autointegration factor OS=Homo sapiens GN=BANF1 PE=1 SV=1	sp|O75531	10 kDa	0	1	1	1	0	1	1	0	0	0	0	0	0	1	1	2	0	1	1	0	0	0	0	0	0.0671277	0.519019	1.64847	NS	0.0638007	8.56077	NS	0.287552	3.12784	NS
948	Importin-9 OS=Homo sapiens GN=IPO9 PE=1 SV=3	sp|Q96P70	116 kDa	0	0	0	0	0	0	0	0	1	1	1	0	0	0	0	0	0	0	0	0	1	1	1	0	0.036866	1	1	NS	0.110971	-7.02891	NS	0.118239	-6.7941	NS
949	Ubiquitin carboxyl-terminal hydrolase 47 OS=Homo sapiens GN=USP47 PE=1 SV=3	sp|Q96K76	157 kDa	0	0	2	1	0	0	0	0	0	0	0	0	0	0	2	1	0	0	0	0	0	0	0	0	0.0576561	0.206724	3.56462	NS	0.189087	3.73281	NS	1	1	NS
950	15 kDa selenoprotein OS=Homo sapiens GN=SEP15 PE=1 SV=3	sp|O60613	18 kDa	0	0	0	0	0	0	0	0	0	0	0	1	0	0	0	0	0	0	0	0	0	0	0	1	0.332827	1	1	NS	0.594879	-1.71644	NS	0.615573	-1.66578	NS
951	Prolyl endopeptidase OS=Homo sapiens GN=PREP PE=1 SV=2	sp|P48147	81 kDa	0	0	1	0	0	0	1	0	0	0	1	0	0	0	1	0	0	0	1	0	0	0	1	0	0.999009	0.915734	-1.09946	NS	0.958298	-1.0479	NS	0.957168	1.04924	NS
952	Eukaryotic translation initiation factor 4B OS=Homo sapiens GN=EIF4B PE=1 SV=2	sp|P23588	69 kDa	0	1	0	0	0	0	0	0	0	0	0	0	0	1	0	0	0	0	0	0	0	0	0	0	0.344071	0.607912	1.6842	NS	0.600172	1.70321	NS	1	1	NS
953	Septin-11 OS=Homo sapiens GN=SEPT11 PE=1 SV=3	sp|Q9NVA2	49 kDa	0	1	0	0	0	0	0	0	0	0	0	0	0	1	0	0	0	0	0	0	0	0	0	0	0.344071	0.607912	1.6842	NS	0.600172	1.70321	NS	1	1	NS
954	Zinc finger Ran-binding domain-containing protein 2 OS=Homo sapiens GN=ZRANB2 PE=1 SV=2	sp|O95218	37 kDa	0	0	0	1	0	0	1	0	0	0	1	1	0	0	0	1	0	0	1	0	0	0	1	1	0.788142	0.92925	-1.09298	NS	0.598249	-1.6093	NS	0.692894	-1.42949	NS
955	Neurolysin, mitochondrial OS=Homo sapiens GN=NLN PE=1 SV=1	sp|Q9BYT8	81 kDa	0	0	1	0	0	0	0	0	0	0	0	0	0	0	1	0	0	0	0	0	0	0	0	0	0.344071	0.656649	1.5729	NS	0.635676	1.61915	NS	1	1	NS
956	26S protease regulatory subunit 10B OS=Homo sapiens GN=PSMC6 PE=1 SV=1	sp|P62333	44 kDa	1	0	0	0	0	0	0	0	1	0	0	0	1	0	0	0	0	0	0	0	1	0	0	0	0.45807	0.604302	1.69302	NS	0.991985	1.00903	NS	0.608224	-1.68344	NS
957	Nitrilase homolog 1 OS=Homo sapiens GN=NIT1 PE=1 SV=2	sp|Q86X76	36 kDa	0	0	0	1	0	1	0	0	0	0	0	0	0	0	0	1	0	1	0	0	0	0	0	0	0.44467	0.984684	-1.01939	NS	0.63559	1.61934	NS	0.607449	1.68532	NS
958	Ribosome maturation protein SBDS OS=Homo sapiens GN=SBDS PE=1 SV=4	sp|Q9Y3A5	29 kDa	0	0	0	1	0	0	0	0	0	0	0	0	0	0	0	1	0	0	0	0	0	0	0	0	0.344071	0.635958	1.61851	NS	0.63559	1.61934	NS	1	1	NS
959	PDZ and LIM domain protein 5 OS=Homo sapiens GN=PDLIM5 PE=1 SV=5	sp|Q96HC4	64 kDa	0	0	0	0	0	0	0	0	0	0	1	0	0	0	0	0	0	0	0	0	0	0	1	0	0.332827	1	1	NS	0.594793	-1.71666	NS	0.636232	-1.61789	NS
960	Oligoribonuclease, mitochondrial OS=Homo sapiens GN=REXO2 PE=1 SV=3	sp|Q9Y3B8	27 kDa	0	0	0	0	0	0	1	0	0	0	0	0	0	0	0	0	0	0	1	0	0	0	0	0	0.323091	0.574011	-1.77065	NS	1	1	NS	0.594241	1.71806	NS
961	Heat shock 70 kDa protein 4L OS=Homo sapiens GN=HSPA4L PE=1 SV=3	sp|O95757	95 kDa	0	0	0	0	0	0	0	0	1	0	0	0	1	0	2	0	2	0	3	0	4	1	1	1	0.424998	0.427649	-1.66076	NS	0.188248	-2.39971	NS	0.590772	-1.36746	NS
962	Eukaryotic translation initiation factor 3 subunit C OS=Homo sapiens GN=EIF3C PE=1 SV=1	sp|Q99613	105 kDa	1	0	0	0	0	0	0	0	0	0	0	0	1	0	0	0	0	0	0	0	0	0	0	0	0.344071	0.604302	1.69302	NS	0.611275	1.67607	NS	1	1	NS
963	Palmitoyl-protein thioesterase 1 OS=Homo sapiens GN=PPT1 PE=1 SV=1	sp|P50897	34 kDa	0	0	0	0	1	0	0	0	0	1	0	0	0	0	0	0	1	0	0	0	0	1	0	0	0.430138	0.626124	-1.641	NS	0.630269	-1.63146	NS	0.999118	1.00111	NS
964	GTP cyclohydrolase 1 feedback regulatory protein OS=Homo sapiens GN=GCHFR PE=1 SV=3	sp|P30047	10 kDa	0	0	0	1	0	0	0	1	0	0	1	0	0	0	0	1	0	0	0	1	0	0	1	0	0.999009	0.957724	-1.04858	NS	0.953472	-1.06012	NS	0.975632	1.03103	NS
965	Cytochrome b-c1 complex subunit 1, mitochondrial OS=Homo sapiens GN=UQCRC1 PE=1 SV=3	sp|P31930	53 kDa	0	0	0	0	0	0	1	0	0	0	1	0	0	0	0	0	0	0	2	0	0	0	1	0	0.362262	0.311022	-2.57239	NS	0.594793	-1.71666	NS	0.629243	1.48714	NS
966	Intraflagellar transport protein 27 homolog OS=Homo sapiens GN=IFT27 PE=1 SV=1	sp|Q9BW83	20 kDa	1	0	0	0	0	1	0	0	0	1	0	0	1	0	0	0	0	1	0	0	0	2	0	0	0.882184	0.979234	1.02637	NS	0.685148	-1.44294	NS	0.702377	-1.36933	NS
967	Signal transducer and activator of transcription 1-alpha/beta OS=Homo sapiens GN=STAT1 PE=1 SV=2	sp|P42224	87 kDa	0	0	0	0	0	1	0	0	0	0	0	0	0	0	0	0	0	1	0	0	0	0	0	0	0.323091	0.622503	-1.64943	NS	1	1	NS	0.607449	1.68532	NS
968	Protein phosphatase 1 regulatory subunit 7 OS=Homo sapiens GN=PPP1R7 PE=1 SV=1	sp|Q15435	42 kDa	0	0	0	0	0	1	0	0	1	0	0	0	0	0	0	0	0	1	0	0	1	0	0	0	0.430138	0.622503	-1.64943	NS	0.619135	-1.65734	NS	0.999118	1.00111	NS
969	Translocon-associated protein subunit delta OS=Homo sapiens GN=SSR4 PE=1 SV=1	sp|P51571	19 kDa	0	0	0	1	0	0	0	0	0	0	0	0	0	0	0	1	0	0	0	0	0	0	0	0	0.344071	0.635958	1.61851	NS	0.63559	1.61934	NS	1	1	NS
970	Filamin-A OS=Homo sapiens GN=FLNA PE=1 SV=4	sp|P21333	281 kDa	0	1	0	0	0	0	0	0	0	0	0	0	0	4	1	1	0	0	0	2	0	0	2	0	0.388527	0.268336	2.4232	NS	0.252515	2.49351	NS	0.970348	1.0325	NS
971	Glutathione S-transferase theta-2B OS=Homo sapiens GN=GSTT2B PE=1 SV=1	sp|P0CG30	28 kDa	0	0	0	0	0	0	0	0	0	0	0	1	0	0	0	0	0	0	0	0	0	0	0	1	0.332827	1	1	NS	0.594879	-1.71644	NS	0.615573	-1.66578	NS
972	Zinc finger protein 626 OS=Homo sapiens GN=ZNF626 PE=2 SV=2	sp|Q68DY1	61 kDa	0	0	0	0	0	1	0	0	0	0	0	0	0	0	0	0	0	1	0	0	0	0	0	0	0.323091	0.622503	-1.64943	NS	1	1	NS	0.607449	1.68532	NS
973	Migration and invasion enhancer 1 OS=Homo sapiens GN=MIEN1 PE=1 SV=1	sp|Q9BRT3	12 kDa	0	0	0	1	0	0	0	0	0	0	0	0	0	0	0	2	0	0	0	0	0	0	0	0	0.290612	0.392424	2.2267	NS	0.391919	2.22853	NS	1	1	NS
974	Ribulose-phosphate 3-epimerase OS=Homo sapiens GN=RPE PE=1 SV=1	sp|Q96AT9	25 kDa	0	1	1	0	0	0	0	0	0	0	1	1	0	1	1	0	0	0	0	0	0	0	1	1	0.209824	0.328621	2.86564	NS	0.952867	-1.05434	NS	0.320486	-2.9116	NS
975	Importin-7 OS=Homo sapiens GN=IPO7 PE=1 SV=1	sp|O95373	120 kDa	0	0	0	0	1	1	0	0	0	0	0	0	0	0	0	0	1	1	0	0	0	0	0	0	0.104385	0.318456	-2.92341	NS	1	1	NS	0.305754	3.00397	NS
976	Stress-induced-phosphoprotein 1 OS=Homo sapiens GN=STIP1 PE=1 SV=1	sp|P31948	63 kDa	0	0	0	0	1	0	0	0	0	0	0	0	0	0	0	0	1	0	0	0	0	0	0	0	0.323091	0.626124	-1.641	NS	1	1	NS	0.62219	1.65016	NS
977	Catechol O-methyltransferase OS=Homo sapiens GN=COMT PE=1 SV=2	sp|P21964	30 kDa	0	0	0	0	0	0	0	0	0	1	0	0	0	0	0	0	0	0	0	0	0	1	0	0	0.332827	1	1	NS	0.630269	-1.63146	NS	0.622967	-1.64835	NS
978	15-hydroxyprostaglandin dehydrogenase [NAD+] OS=Homo sapiens GN=HPGD PE=1 SV=1	sp|P15428	29 kDa	0	0	0	1	0	0	0	0	0	1	1	0	0	0	0	1	0	0	0	0	0	1	1	0	0.25727	0.635958	1.61851	NS	0.589354	-1.73084	NS	0.325552	-2.8808	NS
979	Apolipoprotein L2 OS=Homo sapiens GN=APOL2 PE=1 SV=1	sp|Q9BQE5	37 kDa	0	0	1	0	0	1	0	0	1	0	0	0	0	0	1	0	0	1	0	0	1	0	0	0	0.999009	0.961184	-1.04995	NS	0.981167	-1.0239	NS	0.999118	1.00111	NS
980	Peptidyl-prolyl cis-trans isomerase NIMA-interacting 1 OS=Homo sapiens GN=PIN1 PE=1 SV=1	sp|Q13526	18 kDa	0	0	0	0	0	1	0	0	0	0	0	0	0	0	0	0	0	1	0	0	0	0	0	0	0.323091	0.622503	-1.64943	NS	1	1	NS	0.607449	1.68532	NS
981	Ubiquinone biosynthesis protein COQ9, mitochondrial OS=Homo sapiens GN=COQ9 PE=1 SV=1	sp|O75208	36 kDa	0	0	0	0	0	0	1	0	0	0	0	0	0	0	0	0	0	0	1	0	0	0	0	0	0.323091	0.574011	-1.77065	NS	1	1	NS	0.594241	1.71806	NS
982	Peroxisomal sarcosine oxidase OS=Homo sapiens GN=PIPOX PE=2 SV=2	sp|Q9P0Z9	44 kDa	1	0	0	0	0	0	0	0	0	0	1	0	1	0	0	0	0	0	0	0	0	0	1	0	0.45807	0.604302	1.69302	NS	0.981167	-1.0239	NS	0.636232	-1.61789	NS
983	Peptidyl-prolyl cis-trans isomerase-like 3 OS=Homo sapiens GN=PPIL3 PE=1 SV=1	sp|Q9H2H8	18 kDa	1	0	0	0	0	0	0	0	0	0	1	0	1	0	0	0	0	0	0	0	0	0	1	0	0.45807	0.604302	1.69302	NS	0.981167	-1.0239	NS	0.636232	-1.61789	NS
984	Ataxin-10 OS=Homo sapiens GN=ATXN10 PE=1 SV=1	sp|Q9UBB4	53 kDa	1	0	0	0	0	0	0	0	0	0	0	1	1	0	0	0	0	0	0	0	0	0	0	1	0.45807	0.604302	1.69302	NS	0.981265	-1.02377	NS	0.615573	-1.66578	NS
985	Delta(24)-sterol reductase OS=Homo sapiens GN=DHCR24 PE=1 SV=2	sp|Q15392	60 kDa	0	0	0	1	0	0	0	0	0	0	0	0	0	0	0	1	0	0	0	0	0	0	0	0	0.344071	0.635958	1.61851	NS	0.63559	1.61934	NS	1	1	NS
986	TP53RK-binding protein OS=Homo sapiens GN=TPRKB PE=1 SV=1	sp|Q9Y3C4	20 kDa	0	0	0	0	0	0	0	0	0	1	0	1	0	0	0	0	0	0	0	0	0	1	0	1	0.110771	1	1	NS	0.302525	-3.02678	NS	0.311697	-2.96558	NS
987	Src substrate cortactin OS=Homo sapiens GN=CTTN PE=1 SV=2	sp|Q14247	62 kDa	0	0	1	0	0	0	0	1	0	0	0	0	0	0	1	0	0	0	0	1	0	0	0	0	0.44467	0.92925	-1.09298	NS	0.635676	1.61915	NS	0.614835	1.66754	NS
988	Protein phosphatase 1G OS=Homo sapiens GN=PPM1G PE=1 SV=1	sp|O15355	59 kDa	0	0	0	0	0	0	0	0	0	0	0	1	0	0	0	0	0	0	0	0	0	0	0	1	0.332827	1	1	NS	0.594879	-1.71644	NS	0.615573	-1.66578	NS
989	2-oxoglutarate dehydrogenase, mitochondrial OS=Homo sapiens GN=OGDH PE=1 SV=3	sp|Q02218	116 kDa	1	0	0	0	1	0	0	0	0	0	0	0	1	0	0	0	1	0	0	0	0	0	0	0	0.44467	0.977741	1.02527	NS	0.611275	1.67607	NS	0.62219	1.65016	NS
990	Guanylate kinase OS=Homo sapiens GN=GUK1 PE=1 SV=2	sp|Q16774	22 kDa	0	0	1	0	1	0	0	0	0	0	0	0	0	0	1	0	1	0	0	0	0	0	0	0	0.44467	0.965307	-1.04454	NS	0.635676	1.61915	NS	0.62219	1.65016	NS
991	Cytochrome b-c1 complex subunit 2, mitochondrial OS=Homo sapiens GN=UQCRC2 PE=1 SV=3	sp|P22695	48 kDa	1	0	0	0	1	0	0	0	1	0	0	0	1	0	0	0	2	0	0	0	1	0	0	0	0.793543	0.710544	-1.35708	NS	0.991985	1.00903	NS	0.700372	1.37236	NS
992	Putative adenosylhomocysteinase 2 OS=Homo sapiens GN=AHCYL1 PE=1 SV=2	sp|O43865	59 kDa	0	0	0	0	0	0	0	0	0	1	0	0	0	0	0	0	0	0	0	0	0	1	0	0	0.332827	1	1	NS	0.630269	-1.63146	NS	0.622967	-1.64835	NS
993	Egl nine homolog 1 OS=Homo sapiens GN=EGLN1 PE=1 SV=1	sp|Q9GZT9	46 kDa	0	1	0	0	0	1	0	0	0	0	0	0	0	1	0	0	0	1	0	0	0	0	0	0	0.44467	0.985118	1.01682	NS	0.600172	1.70321	NS	0.607449	1.68532	NS
994	Selenide, water dikinase 2 OS=Homo sapiens GN=SEPHS2 PE=1 SV=3	sp|Q99611	47 kDa	0	1	1	0	0	0	0	0	0	0	0	0	0	1	1	0	0	0	0	0	0	0	0	0	0.118383	0.328621	2.86564	NS	0.309593	2.98078	NS	1	1	NS
995	Importin-11 OS=Homo sapiens GN=IPO11 PE=1 SV=1	sp|Q9UI26	113 kDa	0	0	0	0	0	0	1	0	0	1	0	0	0	0	0	0	0	0	1	0	0	1	0	0	0.430138	0.574011	-1.77065	NS	0.630269	-1.63146	NS	0.967204	1.04199	NS
996	PRA1 family protein 3 OS=Homo sapiens GN=ARL6IP5 PE=1 SV=1	sp|O75915	22 kDa	0	0	0	0	0	0	1	0	0	0	0	1	0	0	0	0	0	0	1	0	0	0	0	1	0.430138	0.574011	-1.77065	NS	0.594879	-1.71644	NS	0.975631	1.03103	NS
997	Transforming protein RhoA OS=Homo sapiens GN=RHOA PE=1 SV=1	sp|P61586	22 kDa	0	0	0	1	0	0	0	1	0	0	0	0	3	3	3	4	2	2	3	4	1	4	2	1	0.57688	0.825273	1.09472	NS	0.295569	1.59027	NS	0.437346	1.4313	NS
998	SAM domain and HD domain-containing protein 1 OS=Homo sapiens GN=SAMHD1 PE=1 SV=2	sp|Q9Y3Z3	72 kDa	0	0	0	0	0	0	0	0	0	0	0	1	0	0	0	0	0	0	0	0	0	0	0	1	0.332827	1	1	NS	0.594879	-1.71644	NS	0.615573	-1.66578	NS
999	Platelet-activating factor acetylhydrolase IB subunit alpha OS=Homo sapiens GN=PAFAH1B1 PE=1 SV=2	sp|P43034	47 kDa	0	0	0	0	0	0	0	0	0	0	2	0	0	0	0	0	0	0	0	0	0	0	2	0	0.280557	1	1	NS	0.337528	-2.44671	NS	0.392799	-2.22535	NS
1000	C-Myc-binding protein OS=Homo sapiens GN=MYCBP PE=1 SV=3	sp|Q99417	12 kDa	0	0	0	1	0	0	0	0	0	0	0	0	0	0	0	2	0	0	0	0	0	0	0	0	0.290612	0.392424	2.2267	NS	0.391919	2.22853	NS	1	1	NS
1001	Calcium-binding protein p22 OS=Homo sapiens GN=CHP PE=1 SV=3	sp|Q99653	22 kDa	0	0	0	0	0	1	0	0	0	0	0	0	0	0	0	0	0	1	0	0	0	0	0	0	0.323091	0.622503	-1.64943	NS	1	1	NS	0.607449	1.68532	NS
1002	Membrane-associated progesterone receptor component 1 OS=Homo sapiens GN=PGRMC1 PE=1 SV=3	sp|O00264	22 kDa	0	0	0	0	0	0	0	0	0	0	1	0	0	0	0	0	0	0	0	0	0	0	1	0	0.332827	1	1	NS	0.594793	-1.71666	NS	0.636232	-1.61789	NS
1003	Metallothionein-1H OS=Homo sapiens GN=MT1H PE=1 SV=1	sp|P80294	6 kDa	0	0	1	0	0	0	0	0	0	0	0	0	0	0	1	0	0	0	0	0	0	0	0	0	0.344071	0.656649	1.5729	NS	0.635676	1.61915	NS	1	1	NS
1004	L-2-hydroxyglutarate dehydrogenase, mitochondrial OS=Homo sapiens GN=L2HGDH PE=1 SV=3	sp|Q9H9P8	50 kDa	0	0	0	0	0	0	0	0	0	1	0	0	0	0	0	0	0	0	0	0	0	1	0	0	0.332827	1	1	NS	0.630269	-1.63146	NS	0.622967	-1.64835	NS
1005	Proteasome activator complex subunit 3 OS=Homo sapiens GN=PSME3 PE=1 SV=1	sp|P61289	30 kDa	1	0	0	0	0	0	0	0	1	0	0	0	2	0	0	0	0	0	0	0	1	0	0	0	0.374249	0.349931	2.39274	NS	0.672345	1.41582	NS	0.608224	-1.68344	NS
1006	Cytochrome c oxidase subunit 4 isoform 1, mitochondrial OS=Homo sapiens GN=COX4I1 PE=1 SV=1	sp|P13073	20 kDa	0	0	0	0	0	0	0	0	0	0	1	0	0	0	0	0	0	0	0	0	0	0	1	0	0.332827	1	1	NS	0.594793	-1.71666	NS	0.636232	-1.61789	NS
1007	40S ribosomal protein S29 OS=Homo sapiens GN=RPS29 PE=1 SV=2	sp|P62273	7 kDa	0	0	0	0	0	0	0	1	0	0	0	0	0	0	0	0	0	0	0	1	0	0	0	0	0.323091	0.594513	-1.71737	NS	1	1	NS	0.614835	1.66754	NS
1008	ADP/ATP translocase 2 OS=Homo sapiens GN=SLC25A5 PE=1 SV=7	sp|P05141	33 kDa	0	0	0	0	0	0	0	0	1	0	0	0	0	0	0	0	0	0	0	0	1	0	0	0	0.332827	1	1	NS	0.619135	-1.65734	NS	0.608224	-1.68344	NS
1009	DNA mismatch repair protein Msh3 OS=Homo sapiens GN=MSH3 PE=1 SV=4	sp|P20585	127 kDa	0	0	1	0	0	0	0	0	0	0	0	0	0	0	1	0	0	0	0	0	0	0	0	0	0.344071	0.656649	1.5729	NS	0.635676	1.61915	NS	1	1	NS
1010	Retinol-binding protein 5 OS=Homo sapiens GN=RBP5 PE=1 SV=3	sp|P82980	16 kDa	1	0	0	0	0	0	0	0	0	0	0	0	1	0	0	0	0	0	0	0	0	0	0	0	0.344071	0.604302	1.69302	NS	0.611275	1.67607	NS	1	1	NS
1011	Density-regulated protein OS=Homo sapiens GN=DENR PE=1 SV=2	sp|O43583	22 kDa	0	0	1	0	1	0	0	1	0	0	0	1	0	0	1	0	1	0	0	1	0	0	0	1	0.765085	0.564386	-1.79641	NS	0.953472	-1.06011	NS	0.659374	1.48936	NS
1012	Tropomyosin alpha-4 chain OS=Homo sapiens GN=TPM4 PE=1 SV=3	sp|P67936	29 kDa	0	0	0	0	1	0	0	1	0	0	1	1	0	3	0	0	1	2	1	2	0	0	2	1	0.387451	0.227262	-2.95282	NS	0.832204	-1.19908	NS	0.280728	2.0957	NS
1013	AP-1 complex subunit sigma-1A OS=Homo sapiens GN=AP1S1 PE=1 SV=1	sp|P61966	19 kDa	0	0	0	0	0	0	0	1	0	1	0	0	0	0	0	0	0	0	0	1	0	1	0	0	0.430138	0.594513	-1.71737	NS	0.630269	-1.63146	NS	0.990731	1.01169	NS
1014	ADP-ribosylation factor-like protein 1 OS=Homo sapiens GN=ARL1 PE=1 SV=1	sp|P40616	20 kDa	0	0	0	0	0	1	0	0	0	1	0	0	0	0	0	0	0	1	0	0	0	1	0	0	0.430138	0.622503	-1.64943	NS	0.630269	-1.63146	NS	0.984173	1.01791	NS
1015	5-oxoprolinase OS=Homo sapiens GN=OPLAH PE=1 SV=3	sp|O14841	137 kDa	0	0	2	0	0	0	0	0	0	0	0	0	0	0	2	0	0	0	0	0	0	0	0	0	0.28039	0.421167	2.12791	NS	0.392037	2.22809	NS	1	1	NS
1016	ATP synthase subunit s, mitochondrial OS=Homo sapiens GN=ATP5S PE=1 SV=3	sp|Q99766	25 kDa	1	0	0	0	0	0	0	0	0	0	0	0	1	0	0	0	0	0	0	0	0	0	0	0	0.344071	0.604302	1.69302	NS	0.611275	1.67607	NS	1	1	NS
1017	Nucleosome assembly protein 1-like 4 OS=Homo sapiens GN=NAP1L4 PE=1 SV=1	sp|Q99733	43 kDa	0	0	0	0	1	0	0	1	0	1	0	0	0	0	0	0	1	0	0	1	0	1	0	0	0.234515	0.29963	-3.04568	NS	0.630269	-1.63146	NS	0.614018	1.66958	NS
1018	Lanosterol 14-alpha demethylase OS=Homo sapiens GN=CYP51A1 PE=1 SV=3	sp|Q16850	57 kDa	0	0	0	0	0	0	1	0	1	0	0	1	0	0	0	0	0	0	1	0	1	0	0	1	0.241582	0.574011	-1.77065	NS	0.295416	-3.0736	NS	0.629497	-1.63345	NS
1019	Biogenesis of lysosome-related organelles complex 1 subunit 1 OS=Homo sapiens GN=BLOC1S1 PE=1 SV=2	sp|P78537	17 kDa	0	0	0	0	0	0	0	1	0	0	0	0	0	0	0	0	0	0	0	1	0	0	0	0	0.323091	0.594513	-1.71737	NS	1	1	NS	0.614835	1.66754	NS
1020	7,8-dihydro-8-oxoguanine triphosphatase OS=Homo sapiens GN=NUDT1 PE=1 SV=3	sp|P36639	23 kDa	1	0	0	0	1	0	0	0	0	1	0	0	1	0	0	0	1	0	0	0	0	1	0	0	0.999009	0.977741	1.02527	NS	0.978353	1.02751	NS	0.999118	1.00111	NS
1021	28S ribosomal protein S27, mitochondrial OS=Homo sapiens GN=MRPS27 PE=1 SV=3	sp|Q92552	48 kDa	0	0	0	1	0	0	0	0	1	0	0	0	0	0	0	1	0	0	0	0	1	0	0	0	0.45807	0.635958	1.61851	NS	0.981265	-1.02377	NS	0.608224	-1.68344	NS
1022	DnaJ homolog subfamily B member 1 OS=Homo sapiens GN=DNAJB1 PE=1 SV=4	sp|P25685	38 kDa	0	0	0	1	0	0	0	0	1	0	0	0	0	0	0	1	0	0	0	0	1	0	0	0	0.45807	0.635958	1.61851	NS	0.981265	-1.02377	NS	0.608224	-1.68344	NS
1023	Thiomorpholine-carboxylate dehydrogenase OS=Homo sapiens GN=CRYM PE=1 SV=1	sp|Q14894	34 kDa	0	0	0	0	0	1	0	0	1	1	0	0	0	0	0	0	0	1	0	0	1	1	0	0	0.241582	0.622503	-1.64943	NS	0.318949	-2.92054	NS	0.661458	-1.48557	NS
1024	Estradiol 17-beta-dehydrogenase 11 OS=Homo sapiens GN=HSD17B11 PE=1 SV=3	sp|Q8NBQ5	33 kDa	0	0	0	0	0	0	0	0	0	1	1	0	0	0	0	0	0	0	0	0	0	1	1	0	0.110771	1	1	NS	0.302467	-3.02717	NS	0.325552	-2.8808	NS
1025	Thioredoxin-related transmembrane protein 1 OS=Homo sapiens GN=TMX1 PE=1 SV=1	sp|Q9H3N1	32 kDa	0	0	0	0	0	0	1	0	0	0	0	0	0	0	0	0	0	0	1	0	0	0	0	0	0.323091	0.574011	-1.77065	NS	1	1	NS	0.594241	1.71806	NS
1026	Protein FAM136A OS=Homo sapiens GN=FAM136A PE=1 SV=1	sp|Q96C01	16 kDa	0	0	0	1	0	0	0	1	0	0	0	0	0	0	0	1	0	0	0	1	0	0	0	0	0.44467	0.957724	-1.04858	NS	0.63559	1.61934	NS	0.614835	1.66754	NS
1027	Paxillin OS=Homo sapiens GN=PXN PE=1 SV=3	sp|P49023	65 kDa	0	0	1	0	0	0	1	0	0	0	1	0	0	0	1	0	0	0	1	0	0	0	1	0	0.999009	0.915734	-1.09946	NS	0.958298	-1.0479	NS	0.957168	1.04924	NS
1028	Guanosine-3',5'-bis(diphosphate) 3'-pyrophosphohydrolase MESH1 OS=Homo sapiens GN=HDDC3 PE=1 SV=3	sp|Q8N4P3	20 kDa	0	0	0	0	1	0	0	0	0	0	0	0	0	0	0	0	1	0	0	0	0	0	0	0	0.323091	0.626124	-1.641	NS	1	1	NS	0.62219	1.65016	NS
1029	26S protease regulatory subunit 6A OS=Homo sapiens GN=PSMC3 PE=1 SV=3	sp|P17980	49 kDa	0	0	0	0	0	1	0	0	0	0	0	0	0	0	0	0	0	1	0	0	0	0	0	0	0.323091	0.622503	-1.64943	NS	1	1	NS	0.607449	1.68532	NS
1030	Myristoylated alanine-rich C-kinase substrate OS=Homo sapiens GN=MARCKS PE=1 SV=4	sp|P29966	32 kDa	0	0	0	0	0	0	0	0	0	0	1	0	0	0	0	0	0	0	0	0	0	0	2	0	0.280557	1	1	NS	0.337528	-2.44671	NS	0.392799	-2.22535	NS
1031	Gamma-glutamyltransferase 5 OS=Homo sapiens GN=GGT5 PE=1 SV=2	sp|P36269	62 kDa	1	0	0	0	0	0	0	0	0	0	0	0	1	0	0	0	0	0	0	0	0	0	0	0	0.344071	0.604302	1.69302	NS	0.611275	1.67607	NS	1	1	NS
1032	Clusterin OS=Homo sapiens GN=CLU PE=1 SV=1	sp|P10909	52 kDa	0	0	0	0	0	0	0	0	0	1	0	0	0	0	0	0	0	0	0	0	0	1	0	0	0.332827	1	1	NS	0.630269	-1.63146	NS	0.622967	-1.64835	NS
1033	Prohibitin-2 OS=Homo sapiens GN=PHB2 PE=1 SV=2	sp|Q99623	33 kDa	0	0	1	0	0	0	0	0	0	0	0	0	0	0	1	0	0	0	0	0	0	0	0	0	0.344071	0.656649	1.5729	NS	0.635676	1.61915	NS	1	1	NS
1034	Perilipin-3 OS=Homo sapiens GN=PLIN3 PE=1 SV=3	sp|O60664	47 kDa	0	1	0	0	0	0	0	0	0	0	0	0	0	1	0	0	0	0	0	0	0	0	0	0	0.344071	0.607912	1.6842	NS	0.600172	1.70321	NS	1	1	NS
1035	Uroporphyrinogen decarboxylase OS=Homo sapiens GN=UROD PE=1 SV=2	sp|P06132	41 kDa	1	0	0	1	0	0	0	0	0	0	0	0	1	0	0	1	0	0	0	0	0	0	0	0	0.118383	0.312596	2.9613	NS	0.317121	2.93245	NS	1	1	NS
1036	Carbohydrate kinase domain-containing protein OS=Homo sapiens GN=CARKD PE=1 SV=1	sp|Q8IW45	37 kDa	0	0	0	0	0	0	0	0	0	1	0	0	0	0	0	0	0	0	0	0	0	1	0	0	0.332827	1	1	NS	0.630269	-1.63146	NS	0.622967	-1.64835	NS
1037	Probable ergosterol biosynthetic protein 28 OS=Homo sapiens GN=C14orf1 PE=1 SV=1	sp|Q9UKR5	16 kDa	0	0	0	1	0	0	0	1	0	0	0	0	0	0	0	2	0	0	0	1	0	0	0	0	0.38109	0.73614	1.31976	NS	0.391919	2.22853	NS	0.614835	1.66754	NS
1038	Heterogeneous nuclear ribonucleoprotein F OS=Homo sapiens GN=HNRNPF PE=1 SV=3	sp|P52597	46 kDa	0	0	0	0	1	0	0	0	0	1	0	0	0	0	0	1	1	0	1	0	0	1	0	0	0.765085	0.564386	-1.79641	NS	0.993948	-1.00762	NS	0.593437	1.72016	NS
1039	Arginase-1 OS=Homo sapiens GN=ARG1 PE=1 SV=2	sp|P05089	35 kDa	0	0	1	0	0	0	0	0	0	0	1	0	0	0	1	0	0	0	0	0	0	0	1	0	0.45807	0.656649	1.5729	NS	0.958298	-1.0479	NS	0.636232	-1.61789	NS
1040	Arginyl-tRNA synthetase, cytoplasmic OS=Homo sapiens GN=RARS PE=1 SV=2	sp|P54136	75 kDa	0	0	0	1	0	0	0	0	0	0	0	0	0	0	0	1	0	0	0	0	0	0	0	0	0.344071	0.635958	1.61851	NS	0.63559	1.61934	NS	1	1	NS
1041	Diphosphomevalonate decarboxylase OS=Homo sapiens GN=MVD PE=1 SV=1	sp|P53602	43 kDa	0	1	0	0	0	0	0	0	0	0	0	0	0	1	0	0	0	0	0	0	0	0	0	0	0.344071	0.607912	1.6842	NS	0.600172	1.70321	NS	1	1	NS
1042	Lymphokine-activated killer T-cell-originated protein kinase OS=Homo sapiens GN=PBK PE=1 SV=3	sp|Q96KB5	36 kDa	0	0	0	0	0	0	1	0	0	0	0	0	0	0	0	0	0	0	1	0	0	0	0	0	0.323091	0.574011	-1.77065	NS	1	1	NS	0.594241	1.71806	NS
1043	Histamine N-methyltransferase OS=Homo sapiens GN=HNMT PE=1 SV=1	sp|P50135	33 kDa	0	1	0	0	0	0	0	0	0	0	0	0	0	1	0	0	0	0	0	0	0	0	0	0	0.344071	0.607912	1.6842	NS	0.600172	1.70321	NS	1	1	NS
1044	Protein LSM12 homolog OS=Homo sapiens GN=LSM12 PE=1 SV=2	sp|Q3MHD2	22 kDa	0	0	1	0	0	0	0	0	0	0	0	0	0	0	1	0	0	0	0	0	0	0	0	0	0.344071	0.656649	1.5729	NS	0.635676	1.61915	NS	1	1	NS
1045	Succinate dehydrogenase [ubiquinone] flavoprotein subunit, mitochondrial OS=Homo sapiens GN=SDHA PE=1 SV=2	sp|P31040	73 kDa	0	0	0	0	0	0	0	0	1	0	0	0	0	0	0	0	0	0	0	0	1	0	0	0	0.332827	1	1	NS	0.619135	-1.65734	NS	0.608224	-1.68344	NS
1046	26S protease regulatory subunit 7 OS=Homo sapiens GN=PSMC2 PE=1 SV=3	sp|P35998	49 kDa	1	0	0	0	1	0	0	0	0	0	0	0	3	0	0	0	1	0	0	0	0	0	0	0	0.377697	0.418994	1.86558	NS	0.24302	3.03395	NS	0.62219	1.65016	NS
1047	Cystatin-A OS=Homo sapiens GN=CSTA PE=1 SV=1	sp|P01040	11 kDa	0	0	1	0	0	0	0	0	0	0	0	0	0	0	1	0	0	0	0	0	0	0	0	0	0.344071	0.656649	1.5729	NS	0.635676	1.61915	NS	1	1	NS
1048	Ras-related protein Rap-1A OS=Homo sapiens GN=RAP1A PE=1 SV=1	sp|P62834	21 kDa	1	0	0	0	0	0	0	0	0	0	0	0	4	0	1	1	3	0	0	2	3	1	1	2	0.864969	0.789588	1.16713	NS	0.745353	-1.19784	NS	0.556221	-1.40807	NS
1049	Reverse sequence, was Zinc finger protein 512B OS=Homo sapiens GN=ZNF512B PE=1 SV=1	sp|REV_Q96KM6	97 kDa	0	0	1	0	0	0	0	0	0	0	0	0	0	0	1	0	0	0	0	0	0	0	0	0	0.344071	0.656649	1.5729	NS	0.635676	1.61915	NS	1	1	NS
1050	Retinoid-inducible serine carboxypeptidase OS=Homo sapiens GN=SCPEP1 PE=1 SV=1	sp|Q9HB40	51 kDa	0	1	0	0	0	1	0	0	0	1	0	0	0	1	0	0	0	1	0	0	0	1	0	0	0.999009	0.985118	1.01682	NS	0.969299	1.03504	NS	0.984173	1.01791	NS
1051	Agmatinase, mitochondrial OS=Homo sapiens GN=AGMAT PE=1 SV=2	sp|Q9BSE5	38 kDa	0	0	0	0	0	1	0	0	0	0	0	0	0	0	0	0	0	1	0	0	0	0	0	0	0.323091	0.622503	-1.64943	NS	1	1	NS	0.607449	1.68532	NS
1052	Up-regulated during skeletal muscle growth protein 5 OS=Homo sapiens GN=USMG5 PE=1 SV=1	sp|Q96IX5	6 kDa	0	0	1	0	0	0	0	0	0	0	0	0	0	0	1	0	0	0	0	0	0	0	0	0	0.344071	0.656649	1.5729	NS	0.635676	1.61915	NS	1	1	NS
1053	Glutathione synthetase OS=Homo sapiens GN=GSS PE=1 SV=1	sp|P48637	52 kDa	0	0	0	0	0	0	0	1	0	0	0	0	0	0	0	0	0	0	0	1	0	0	0	0	0.323091	0.594513	-1.71737	NS	1	1	NS	0.614835	1.66754	NS
1054	Proline synthase co-transcribed bacterial homolog protein OS=Homo sapiens GN=PROSC PE=1 SV=1	sp|O94903	30 kDa	0	0	1	0	0	0	0	0	0	1	0	0	0	0	1	0	0	0	0	0	0	1	0	0	0.45807	0.656649	1.5729	NS	0.99385	-1.00774	NS	0.622967	-1.64835	NS
1055	TAR DNA-binding protein 43 OS=Homo sapiens GN=TARDBP PE=1 SV=1	sp|Q13148	45 kDa	0	0	0	0	0	0	0	0	1	1	0	0	0	0	0	0	0	0	0	0	1	1	0	0	0.110771	1	1	NS	0.318949	-2.92054	NS	0.306779	-2.99731	NS
1056	Opioid growth factor receptor OS=Homo sapiens GN=OGFR PE=1 SV=3	sp|Q9NZT2	73 kDa	0	0	1	0	0	0	0	0	0	1	0	0	0	0	1	0	0	0	0	0	0	1	0	0	0.45807	0.656649	1.5729	NS	0.99385	-1.00774	NS	0.622967	-1.64835	NS
1057	N(G),N(G)-dimethylarginine dimethylaminohydrolase 1 OS=Homo sapiens GN=DDAH1 PE=1 SV=3	sp|O94760	31 kDa	0	0	1	0	0	0	0	0	0	0	0	0	0	0	1	0	0	0	0	0	0	0	0	0	0.344071	0.656649	1.5729	NS	0.635676	1.61915	NS	1	1	NS
1058	Flap endonuclease 1 OS=Homo sapiens GN=FEN1 PE=1 SV=1	sp|P39748	43 kDa	0	0	0	0	0	0	1	0	0	1	0	0	0	0	0	0	0	0	1	0	0	1	0	0	0.430138	0.574011	-1.77065	NS	0.630269	-1.63146	NS	0.967204	1.04199	NS
1059	FK506-binding protein 15 OS=Homo sapiens GN=FKBP15 PE=1 SV=2	sp|Q5T1M5	134 kDa	0	0	0	0	0	1	0	0	0	0	0	0	0	0	0	0	0	1	0	0	0	0	0	0	0.323091	0.622503	-1.64943	NS	1	1	NS	0.607449	1.68532	NS
1060	Epidermal growth factor receptor substrate 15 OS=Homo sapiens GN=EPS15 PE=1 SV=2	sp|P42566	99 kDa	0	0	0	0	0	0	1	0	0	0	0	0	0	0	0	0	0	0	1	0	0	0	0	0	0.323091	0.574011	-1.77065	NS	1	1	NS	0.594241	1.71806	NS
1061	Vacuolar protein sorting-associated protein 26A OS=Homo sapiens GN=VPS26A PE=1 SV=2	sp|O75436	38 kDa	0	0	0	0	0	1	0	0	0	0	0	1	0	0	0	0	0	1	0	0	0	0	0	1	0.430138	0.622503	-1.64943	NS	0.594879	-1.71644	NS	0.990731	1.01169	NS
1062	UPF0428 protein CXorf56 OS=Homo sapiens GN=CXorf56 PE=1 SV=1	sp|Q9H5V9	26 kDa	0	0	1	1	0	0	0	0	0	0	0	0	0	0	1	1	0	0	0	0	0	0	0	0	0.118383	0.348491	2.75131	NS	0.333829	2.83226	NS	1	1	NS
1063	Long-chain specific acyl-CoA dehydrogenase, mitochondrial OS=Homo sapiens GN=ACADL PE=2 SV=2	sp|P28330	48 kDa	1	0	0	0	0	0	0	0	0	0	0	0	1	0	0	0	0	0	0	0	0	0	0	0	0.344071	0.604302	1.69302	NS	0.611275	1.67607	NS	1	1	NS
1064	Interferon-inducible double stranded RNA-dependent protein kinase activator A OS=Homo sapiens GN=PRKRA PE=1 SV=1	sp|O75569	34 kDa	0	0	0	1	0	1	0	0	0	0	0	0	0	0	0	1	0	1	0	0	0	0	0	0	0.44467	0.984684	-1.01939	NS	0.63559	1.61934	NS	0.607449	1.68532	NS
1065	5'(3')-deoxyribonucleotidase, cytosolic type OS=Homo sapiens GN=NT5C PE=1 SV=2	sp|Q8TCD5	23 kDa	0	0	0	1	0	0	0	0	0	0	0	0	0	0	0	1	0	0	0	0	0	0	0	0	0.344071	0.635958	1.61851	NS	0.63559	1.61934	NS	1	1	NS
1066	Uncharacterized protein CXorf67 OS=Homo sapiens GN=CXorf67 PE=2 SV=1	sp|Q86X51	52 kDa	0	0	0	0	0	0	1	0	0	0	0	0	0	0	0	0	0	0	1	0	0	0	0	0	0.323091	0.574011	-1.77065	NS	1	1	NS	0.594241	1.71806	NS
1067	EH domain-containing protein 2 OS=Homo sapiens GN=EHD2 PE=1 SV=2	sp|Q9NZN4	61 kDa	0	0	1	0	0	0	0	0	0	0	0	0	0	0	1	0	0	0	0	0	0	0	0	0	0.344071	0.656649	1.5729	NS	0.635676	1.61915	NS	1	1	NS
1068	Protein TFG OS=Homo sapiens GN=TFG PE=1 SV=2	sp|Q92734	43 kDa	0	0	0	0	0	0	0	0	1	0	0	0	0	0	0	0	0	0	0	0	1	0	0	0	0.332827	1	1	NS	0.619135	-1.65734	NS	0.608224	-1.68344	NS
1069	La-related protein 1 OS=Homo sapiens GN=LARP1 PE=1 SV=2	sp|Q6PKG0	124 kDa	0	0	1	0	0	0	0	1	0	0	0	0	0	0	1	0	0	0	0	1	0	0	0	0	0.44467	0.92925	-1.09298	NS	0.635676	1.61915	NS	0.614835	1.66754	NS
1070	Cellular nucleic acid-binding protein OS=Homo sapiens GN=CNBP PE=1 SV=1	sp|P62633	19 kDa	0	0	0	0	0	0	0	0	0	1	0	0	0	0	0	0	0	0	0	0	0	1	0	0	0.332827	1	1	NS	0.630269	-1.63146	NS	0.622967	-1.64835	NS
1071	Uncharacterized protein KIAA0930 OS=Homo sapiens GN=KIAA0930 PE=1 SV=1	sp|Q6ICG6	46 kDa	1	0	0	1	0	0	0	0	0	0	0	0	1	0	0	1	0	0	0	0	0	0	0	0	0.118383	0.312596	2.9613	NS	0.317121	2.93245	NS	1	1	NS
1072	Tyrosine-protein kinase Fes/Fps OS=Homo sapiens GN=FES PE=1 SV=3	sp|P07332	93 kDa	0	1	0	0	0	0	0	0	0	0	0	0	0	1	0	0	0	0	0	0	0	0	0	0	0.344071	0.607912	1.6842	NS	0.600172	1.70321	NS	1	1	NS
1073	DNA mismatch repair protein Msh6 OS=Homo sapiens GN=MSH6 PE=1 SV=2	sp|P52701	153 kDa	0	0	1	0	0	0	0	0	0	0	0	0	0	0	1	0	0	0	0	0	0	0	0	0	0.344071	0.656649	1.5729	NS	0.635676	1.61915	NS	1	1	NS
1074	Mannose-1-phosphate guanyltransferase alpha OS=Homo sapiens GN=GMPPA PE=1 SV=1	sp|Q96IJ6	46 kDa	1	0	0	0	1	0	0	0	0	0	0	0	1	0	0	0	1	0	0	0	0	0	0	0	0.44467	0.977741	1.02527	NS	0.611275	1.67607	NS	0.62219	1.65016	NS
1075	UV excision repair protein RAD23 homolog A OS=Homo sapiens GN=RAD23A PE=1 SV=1	sp|P54725	40 kDa	0	0	0	0	0	0	1	0	0	0	0	0	0	0	0	0	0	0	1	0	0	0	0	0	0.323091	0.574011	-1.77065	NS	1	1	NS	0.594241	1.71806	NS
1076	Importin-5 OS=Homo sapiens GN=IPO5 PE=1 SV=4	sp|O00410	124 kDa	0	0	0	0	0	0	0	1	0	0	0	0	0	0	0	0	0	0	0	1	0	0	0	0	0.323091	0.594513	-1.71737	NS	1	1	NS	0.614835	1.66754	NS
1077	Tyrosine-protein phosphatase non-receptor type 11 OS=Homo sapiens GN=PTPN11 PE=1 SV=2	sp|Q06124	68 kDa	0	0	0	0	1	0	0	0	0	0	0	0	0	0	0	0	1	0	0	0	0	0	0	0	0.323091	0.626124	-1.641	NS	1	1	NS	0.62219	1.65016	NS
1078	Casein kinase II subunit beta OS=Homo sapiens GN=CSNK2B PE=1 SV=1	sp|P67870	25 kDa	0	0	0	0	0	1	0	0	0	0	0	0	0	0	0	0	0	1	0	0	0	0	0	0	0.323091	0.622503	-1.64943	NS	1	1	NS	0.607449	1.68532	NS
1079	N-alpha-acetyltransferase 50 OS=Homo sapiens GN=NAA50 PE=1 SV=1	sp|Q9GZZ1	19 kDa	0	0	0	0	0	0	0	0	0	1	0	0	0	0	0	0	0	0	0	0	0	1	0	0	0.332827	1	1	NS	0.630269	-1.63146	NS	0.622967	-1.64835	NS
1080	Stromal cell-derived factor 2-like protein 1 OS=Homo sapiens GN=SDF2L1 PE=1 SV=2	sp|Q9HCN8	24 kDa	0	0	0	0	1	0	0	0	0	0	0	0	0	0	0	0	1	0	0	0	0	0	0	0	0.323091	0.626124	-1.641	NS	1	1	NS	0.62219	1.65016	NS
1081	PERQ amino acid-rich with GYF domain-containing protein 2 OS=Homo sapiens GN=GIGYF2 PE=1 SV=1	sp|Q6Y7W6	150 kDa	0	0	0	1	0	0	0	0	0	0	0	0	0	0	0	1	0	0	0	0	0	0	0	0	0.344071	0.635958	1.61851	NS	0.63559	1.61934	NS	1	1	NS
1082	DNA-binding protein A OS=Homo sapiens GN=CSDA PE=1 SV=4	sp|P16989	40 kDa	0	0	0	0	0	1	0	0	0	0	0	0	0	0	0	0	0	1	0	0	0	0	0	0	0.323091	0.622503	-1.64943	NS	1	1	NS	0.607449	1.68532	NS
1083	N(4)-(beta-N-acetylglucosaminyl)-L-asparaginase OS=Homo sapiens GN=AGA PE=1 SV=2	sp|P20933	37 kDa	0	0	0	0	1	0	0	0	0	0	0	0	0	0	0	0	1	0	0	0	0	0	0	0	0.323091	0.626124	-1.641	NS	1	1	NS	0.62219	1.65016	NS
1084	Serine/threonine-protein phosphatase 2A activator OS=Homo sapiens GN=PPP2R4 PE=1 SV=3	sp|Q15257	41 kDa	1	0	0	0	0	0	0	0	0	0	0	0	2	0	0	0	0	0	0	0	0	0	0	0	0.287028	0.349931	2.39274	NS	0.359134	2.35444	NS	1	1	NS
1085	Reverse sequence, was Metal transporter CNNM4 OS=Homo sapiens GN=CNNM4 PE=1 SV=3	sp|REV_Q6P4Q7	87 kDa	0	0	0	0	0	1	0	0	0	0	0	0	0	0	0	0	0	1	0	0	0	0	0	0	0.323091	0.622503	-1.64943	NS	1	1	NS	0.607449	1.68532	NS
1086	COMM domain-containing protein 1 OS=Homo sapiens GN=COMMD1 PE=1 SV=1	sp|Q8N668	21 kDa	0	0	0	0	0	0	0	0	0	1	0	1	0	0	0	0	0	0	0	0	0	1	0	1	0.110771	1	1	NS	0.302525	-3.02678	NS	0.311697	-2.96558	NS
1087	BRI3-binding protein OS=Homo sapiens GN=BRI3BP PE=1 SV=1	sp|Q8WY22	28 kDa	0	0	0	0	0	0	0	0	0	1	0	1	0	0	0	0	0	0	0	0	0	1	0	1	0.110771	1	1	NS	0.302525	-3.02678	NS	0.311697	-2.96558	NS
1088	26S proteasome non-ATPase regulatory subunit 14 OS=Homo sapiens GN=PSMD14 PE=1 SV=1	sp|O00487	35 kDa	0	1	0	0	0	1	0	0	0	0	0	0	0	1	0	0	0	1	0	0	0	0	0	0	0.44467	0.985118	1.01682	NS	0.600172	1.70321	NS	0.607449	1.68532	NS
1089	Arfaptin-1 OS=Homo sapiens GN=ARFIP1 PE=1 SV=2	sp|P53367	42 kDa	0	0	0	0	0	0	0	1	0	0	0	1	0	0	0	0	0	0	0	1	0	0	0	1	0.430138	0.594513	-1.71737	NS	0.594879	-1.71644	NS	0.999253	1.00084	NS
1090	Keratin, type I cytoskeletal 14 OS=Homo sapiens GN=KRT14 PE=1 SV=4	sp|P02533	52 kDa	0	1	0	0	0	0	0	0	0	0	0	0	4	4	3	3	7	4	5	5	3	4	3	4	0.305606	0.179348	-1.5826	NS	0.949464	-1.02427	NS	0.205335	1.54118	NS
1091	Plasminogen activator inhibitor 1 RNA-binding protein OS=Homo sapiens GN=SERBP1 PE=1 SV=2	sp|Q8NC51	45 kDa	0	0	0	0	0	0	0	0	1	1	0	0	0	0	0	0	0	0	0	0	1	1	0	0	0.110771	1	1	NS	0.318949	-2.92054	NS	0.306779	-2.99731	NS
1092	Intercellular adhesion molecule 1 OS=Homo sapiens GN=ICAM1 PE=1 SV=2	sp|P05362	58 kDa	0	0	0	0	0	1	0	1	0	0	0	0	0	0	0	0	0	1	0	1	0	0	0	0	0.104385	0.29732	-3.06093	NS	1	1	NS	0.300956	3.03531	NS
1093	Pantothenate kinase 2, mitochondrial OS=Homo sapiens GN=PANK2 PE=1 SV=3	sp|Q9BZ23	63 kDa	0	0	0	1	0	0	0	0	0	1	0	0	0	0	0	1	0	0	0	0	0	1	0	0	0.45807	0.635958	1.61851	NS	0.993948	-1.00762	NS	0.622967	-1.64835	NS
1094	Actin-related protein 2/3 complex subunit 1B OS=Homo sapiens GN=ARPC1B PE=1 SV=3	sp|O15143	41 kDa	0	0	0	0	0	0	0	0	0	0	0	1	0	0	0	0	0	0	0	0	0	0	0	1	0.332827	1	1	NS	0.594879	-1.71644	NS	0.615573	-1.66578	NS
1095	Carnitine O-acetyltransferase OS=Homo sapiens GN=CRAT PE=1 SV=5	sp|P43155	71 kDa	0	0	0	0	0	0	0	0	1	0	0	0	0	0	0	0	0	0	0	0	1	0	0	0	0.332827	1	1	NS	0.619135	-1.65734	NS	0.608224	-1.68344	NS
1096	Uridine-cytidine kinase-like 1 OS=Homo sapiens GN=UCKL1 PE=1 SV=2	sp|Q9NWZ5	61 kDa	0	0	0	0	0	0	0	0	1	0	0	0	0	0	0	0	0	0	0	0	1	0	0	0	0.332827	1	1	NS	0.619135	-1.65734	NS	0.608224	-1.68344	NS
1097	Acyl-CoA dehydrogenase family member 10 OS=Homo sapiens GN=ACAD10 PE=2 SV=1	sp|Q6JQN1	119 kDa	0	0	0	0	1	0	0	0	1	0	0	0	0	0	0	0	1	0	0	0	1	0	0	0	0.430138	0.626124	-1.641	NS	0.619135	-1.65734	NS	0.985756	-1.0161	NS
1098	COMM domain-containing protein 9 OS=Homo sapiens GN=COMMD9 PE=1 SV=2	sp|Q9P000	22 kDa	0	0	0	0	1	0	0	0	0	0	0	0	0	0	0	0	1	0	0	0	0	0	0	0	0.323091	0.626124	-1.641	NS	1	1	NS	0.62219	1.65016	NS
1099	Osteoclast-stimulating factor 1 OS=Homo sapiens GN=OSTF1 PE=1 SV=2	sp|Q92882	24 kDa	0	0	0	0	1	0	0	0	0	0	0	0	0	0	0	0	1	0	0	0	0	0	0	0	0.323091	0.626124	-1.641	NS	1	1	NS	0.62219	1.65016	NS
1100	ADP-ribosylation factor-like protein 2 OS=Homo sapiens GN=ARL2 PE=1 SV=4	sp|P36404	21 kDa	1	0	0	0	0	0	0	0	0	0	0	0	1	0	0	0	0	0	0	0	0	0	0	0	0.344071	0.604302	1.69302	NS	0.611275	1.67607	NS	1	1	NS
1101	Phosphopantothenate--cysteine ligase OS=Homo sapiens GN=PPCS PE=1 SV=2	sp|Q9HAB8	34 kDa	0	0	1	0	0	0	0	0	0	0	0	0	0	0	1	0	0	0	0	0	0	0	0	0	0.344071	0.656649	1.5729	NS	0.635676	1.61915	NS	1	1	NS
1102	Eukaryotic translation initiation factor 3 subunit G OS=Homo sapiens GN=EIF3G PE=1 SV=2	sp|O75821	36 kDa	0	0	0	0	0	0	0	0	0	0	0	1	0	0	0	0	0	0	0	0	0	0	0	1	0.332827	1	1	NS	0.594879	-1.71644	NS	0.615573	-1.66578	NS
1103	Eukaryotic translation initiation factor 3 subunit J OS=Homo sapiens GN=EIF3J PE=1 SV=2	sp|O75822	29 kDa	0	0	1	0	1	0	0	0	0	0	0	0	0	0	1	0	1	0	0	0	0	0	0	0	0.44467	0.965307	-1.04454	NS	0.635676	1.61915	NS	0.62219	1.65016	NS
1104	BAG family molecular chaperone regulator 3 OS=Homo sapiens GN=BAG3 PE=1 SV=3	sp|O95817	62 kDa	0	0	0	0	0	0	0	0	0	0	1	0	0	0	0	0	0	0	0	0	0	0	1	0	0.332827	1	1	NS	0.594793	-1.71666	NS	0.636232	-1.61789	NS
1105	26S proteasome non-ATPase regulatory subunit 6 OS=Homo sapiens GN=PSMD6 PE=1 SV=1	sp|Q15008	46 kDa	0	0	0	0	0	0	0	0	0	1	0	0	0	0	0	0	0	0	0	0	0	1	0	0	0.332827	1	1	NS	0.630269	-1.63146	NS	0.622967	-1.64835	NS
1106	6-phosphofructokinase, liver type OS=Homo sapiens GN=PFKL PE=1 SV=6	sp|P17858	85 kDa	0	0	0	0	0	0	0	0	0	0	1	0	0	0	0	0	0	0	0	0	0	0	1	0	0.332827	1	1	NS	0.594793	-1.71666	NS	0.636232	-1.61789	NS
1107	Nucleophosmin OS=Homo sapiens GN=NPM1 PE=1 SV=2	sp|P06748	33 kDa	0	0	0	0	1	0	0	0	0	0	0	0	0	0	0	0	1	0	0	0	0	0	0	0	0.323091	0.626124	-1.641	NS	1	1	NS	0.62219	1.65016	NS
1108	Glutathione S-transferase Mu 4 OS=Homo sapiens GN=GSTM4 PE=1 SV=3	sp|Q03013 (+1)	26 kDa	0	0	0	0	0	0	0	0	0	1	0	0	0	0	0	0	0	0	0	0	0	1	0	0	0.332827	1	1	NS	0.630269	-1.63146	NS	0.622967	-1.64835	NS
1109	45 kDa calcium-binding protein OS=Homo sapiens GN=SDF4 PE=1 SV=1	sp|Q9BRK5	42 kDa	0	0	1	0	0	0	0	0	0	0	0	0	0	0	1	0	0	0	0	0	0	0	0	0	0.344071	0.656649	1.5729	NS	0.635676	1.61915	NS	1	1	NS
1110	Iron-sulfur cluster assembly enzyme ISCU, mitochondrial OS=Homo sapiens GN=ISCU PE=1 SV=2	sp|Q9H1K1	18 kDa	0	1	0	0	0	0	0	0	0	0	0	0	0	1	0	0	0	0	0	0	0	0	0	0	0.344071	0.607912	1.6842	NS	0.600172	1.70321	NS	1	1	NS
1111	Mevalonate kinase OS=Homo sapiens GN=MVK PE=1 SV=1	sp|Q03426	42 kDa	1	0	0	0	0	0	0	0	0	0	0	0	1	0	0	0	0	0	0	0	0	0	0	0	0.344071	0.604302	1.69302	NS	0.611275	1.67607	NS	1	1	NS
1112	Importin-4 OS=Homo sapiens GN=IPO4 PE=1 SV=2	sp|Q8TEX9	119 kDa	0	0	0	0	0	1	0	0	0	0	0	0	0	0	0	0	0	1	0	0	0	0	0	0	0.323091	0.622503	-1.64943	NS	1	1	NS	0.607449	1.68532	NS
1113	Talin-2 OS=Homo sapiens GN=TLN2 PE=1 SV=4	sp|Q9Y4G6	272 kDa	0	1	0	0	0	0	0	0	0	0	0	0	1	1	0	1	0	2	0	0	0	0	0	0	0.123529	0.671954	1.41667	NS	0.111835	6.99998	NS	0.354074	2.37532	NS
1114	Reverse sequence, was Protein FAM196A OS=Homo sapiens GN=FAM196A PE=2 SV=1	sp|REV_Q6ZSG2	53 kDa	0	0	0	1	0	0	0	0	0	0	0	0	0	0	0	1	0	0	0	0	0	0	0	0	0.344071	0.635958	1.61851	NS	0.63559	1.61934	NS	1	1	NS
1115	Sulfite oxidase, mitochondrial OS=Homo sapiens GN=SUOX PE=1 SV=2	sp|P51687	60 kDa	0	0	0	0	0	0	0	0	0	1	0	0	0	0	0	0	0	0	0	0	0	1	0	0	0.332827	1	1	NS	0.630269	-1.63146	NS	0.622967	-1.64835	NS
1116	APOBEC1 complementation factor OS=Homo sapiens GN=A1CF PE=1 SV=1	sp|Q9NQ94	65 kDa	0	0	0	0	0	0	0	0	0	1	0	0	0	0	0	0	0	0	0	0	0	1	0	0	0.332827	1	1	NS	0.630269	-1.63146	NS	0.622967	-1.64835	NS
1117	LanC-like protein 2 OS=Homo sapiens GN=LANCL2 PE=1 SV=1	sp|Q9NS86	51 kDa	0	0	0	0	0	0	0	1	0	0	0	0	0	0	0	0	0	0	0	1	0	0	0	0	0.323091	0.594513	-1.71737	NS	1	1	NS	0.614835	1.66754	NS
1118	Cell differentiation protein RCD1 homolog OS=Homo sapiens GN=RQCD1 PE=1 SV=1	sp|Q92600	34 kDa	0	1	0	0	0	0	0	0	0	0	0	0	0	1	0	0	0	0	0	0	0	0	0	0	0.344071	0.607912	1.6842	NS	0.600172	1.70321	NS	1	1	NS
1119	tRNA-splicing ligase RtcB homolog OS=Homo sapiens GN=C22orf28 PE=1 SV=1	sp|Q9Y3I0	55 kDa	0	0	0	0	1	0	0	0	0	0	0	0	0	0	0	0	1	0	0	0	0	0	0	0	0.323091	0.626124	-1.641	NS	1	1	NS	0.62219	1.65016	NS
1120	RNA-binding protein PNO1 OS=Homo sapiens GN=PNO1 PE=1 SV=1	sp|Q9NRX1	28 kDa	0	0	0	0	1	0	0	0	0	0	0	0	0	0	0	0	1	0	0	0	0	0	0	0	0.323091	0.626124	-1.641	NS	1	1	NS	0.62219	1.65016	NS
1121	Membrane transport protein XK OS=Homo sapiens GN=XK PE=1 SV=5	sp|P51811	51 kDa	0	0	0	0	0	0	0	0	0	1	0	0	0	0	0	0	0	0	0	0	0	1	0	0	0.332827	1	1	NS	0.630269	-1.63146	NS	0.622967	-1.64835	NS
1122	COP9 signalosome complex subunit 4 OS=Homo sapiens GN=COPS4 PE=1 SV=1	sp|Q9BT78	46 kDa	0	0	0	0	0	0	0	0	1	0	0	0	0	0	0	0	0	0	0	0	1	0	0	0	0.332827	1	1	NS	0.619135	-1.65734	NS	0.608224	-1.68344	NS
1123	Mitochondrial import inner membrane translocase subunit Tim8 B OS=Homo sapiens GN=TIMM8B PE=1 SV=1	sp|Q9Y5J9	9 kDa	0	0	0	0	0	0	0	0	0	1	0	0	0	0	0	0	0	0	0	0	0	1	0	0	0.332827	1	1	NS	0.630269	-1.63146	NS	0.622967	-1.64835	NS
1124	UPF0587 protein C1orf123 OS=Homo sapiens GN=C1orf123 PE=1 SV=1	sp|Q9NWV4	18 kDa	1	0	0	0	0	0	0	0	0	0	0	0	1	0	0	0	0	0	0	0	0	0	0	0	0.344071	0.604302	1.69302	NS	0.611275	1.67607	NS	1	1	NS
1125	Guanylate-binding protein 3 OS=Homo sapiens GN=GBP3 PE=2 SV=3	sp|Q9H0R5	68 kDa	0	0	0	0	0	0	0	0	0	1	0	0	0	0	0	0	0	0	0	0	0	1	0	0	0.332827	1	1	NS	0.630269	-1.63146	NS	0.622967	-1.64835	NS
1126	Signal recognition particle 68 kDa protein OS=Homo sapiens GN=SRP68 PE=1 SV=2	sp|Q9UHB9	71 kDa	0	0	1	0	0	0	0	0	0	0	0	0	0	0	1	0	0	0	0	0	0	0	0	0	0.344071	0.656649	1.5729	NS	0.635676	1.61915	NS	1	1	NS
1127	Drebrin-like protein OS=Homo sapiens GN=DBNL PE=1 SV=1	sp|Q9UJU6	48 kDa	1	0	0	0	0	0	0	0	0	0	0	0	1	0	0	0	0	0	0	0	0	0	0	0	0.344071	0.604302	1.69302	NS	0.611275	1.67607	NS	1	1	NS
1128	Polymerase I and transcript release factor OS=Homo sapiens GN=PTRF PE=1 SV=1	sp|Q6NZI2	43 kDa	0	0	1	0	0	0	0	0	0	0	0	0	0	0	1	0	0	0	0	0	0	0	0	0	0.344071	0.656649	1.5729	NS	0.635676	1.61915	NS	1	1	NS
1129	Putative phospholipase B-like 2 OS=Homo sapiens GN=PLBD2 PE=1 SV=2	sp|Q8NHP8	65 kDa	0	0	0	0	0	0	0	0	0	0	1	0	0	0	0	0	0	0	0	0	0	0	1	0	0.332827	1	1	NS	0.594793	-1.71666	NS	0.636232	-1.61789	NS
1130	COMM domain-containing protein 3 OS=Homo sapiens GN=COMMD3 PE=1 SV=1	sp|Q9UBI1	22 kDa	0	0	0	0	1	0	0	0	0	0	0	0	0	0	0	0	1	0	0	0	0	0	0	0	0.323091	0.626124	-1.641	NS	1	1	NS	0.62219	1.65016	NS
1131	UDP-glucuronosyltransferase 1-9 OS=Homo sapiens GN=UGT1A9 PE=1 SV=1	sp|O60656	60 kDa	0	0	0	0	0	0	0	0	0	0	1	0	2	2	4	2	0	0	5	1	4	2	6	0	0.406012	0.395011	1.88429	NS	0.599288	-1.25188	NS	0.232352	-2.26503	NS
1132	Uncharacterized protein FLJ45252 OS=Homo sapiens PE=1 SV=2	sp|Q6ZSR9	38 kDa	0	0	0	0	0	0	1	0	0	0	0	0	0	0	0	0	0	0	1	0	0	0	0	0	0.323091	0.574011	-1.77065	NS	1	1	NS	0.594241	1.71806	NS
1133	VPS10 domain-containing receptor SorCS2 OS=Homo sapiens GN=SORCS2 PE=1 SV=3	sp|Q96PQ0	128 kDa	0	0	0	1	0	0	0	0	0	0	0	0	0	0	0	1	0	0	0	0	0	0	0	0	0.344071	0.635958	1.61851	NS	0.63559	1.61934	NS	1	1	NS
1134	Putative mitochondrial import inner membrane translocase subunit Tim23B OS=Homo sapiens GN=TIMM23B PE=5 SV=2	sp|Q5SRD1	28 kDa	0	0	0	1	0	0	0	0	0	0	0	0	0	0	0	1	0	0	0	0	0	0	0	0	0.344071	0.635958	1.61851	NS	0.63559	1.61934	NS	1	1	NS
1135	Vesicle-associated membrane protein 2 OS=Homo sapiens GN=VAMP2 PE=1 SV=3	sp|P63027 (+1)	13 kDa	0	1	0	0	0	0	0	0	0	0	0	0	0	1	0	0	0	0	0	0	0	0	0	0	0.344071	0.607912	1.6842	NS	0.600172	1.70321	NS	1	1	NS
1136	LYR motif-containing protein 7 OS=Homo sapiens GN=LYRM7 PE=1 SV=1	sp|Q5U5X0	12 kDa	0	1	0	0	0	0	0	0	0	0	0	0	0	1	0	0	0	0	0	0	0	0	0	0	0.344071	0.607912	1.6842	NS	0.600172	1.70321	NS	1	1	NS
1137	Coatomer subunit delta OS=Homo sapiens GN=ARCN1 PE=1 SV=1	sp|P48444	57 kDa	0	0	0	0	0	0	0	0	0	1	0	0	0	0	0	0	0	0	0	0	0	1	0	0	0.332827	1	1	NS	0.630269	-1.63146	NS	0.622967	-1.64835	NS
1138	Protein LYRIC OS=Homo sapiens GN=MTDH PE=1 SV=2	sp|Q86UE4	64 kDa	0	0	0	0	0	0	0	0	0	1	0	0	0	0	0	0	0	0	0	0	0	1	0	0	0.332827	1	1	NS	0.630269	-1.63146	NS	0.622967	-1.64835	NS
1139	Ubiquitin-like-conjugating enzyme ATG3 OS=Homo sapiens GN=ATG3 PE=1 SV=1	sp|Q9NT62	36 kDa	0	0	0	0	0	0	0	0	0	1	0	0	0	0	0	0	0	0	0	0	0	1	0	0	0.332827	1	1	NS	0.630269	-1.63146	NS	0.622967	-1.64835	NS
1140	Lysozyme C OS=Homo sapiens GN=LYZ PE=1 SV=1	sp|P61626	17 kDa	0	0	0	0	0	1	0	0	0	0	0	0	0	0	0	0	0	1	0	0	0	0	0	0	0.323091	0.622503	-1.64943	NS	1	1	NS	0.607449	1.68532	NS
1141	Heterogeneous nuclear ribonucleoprotein A3 OS=Homo sapiens GN=HNRNPA3 PE=1 SV=2	sp|P51991	40 kDa	0	0	0	0	0	0	0	0	1	0	0	0	0	0	0	0	0	0	0	0	1	0	0	0	0.332827	1	1	NS	0.619135	-1.65734	NS	0.608224	-1.68344	NS
1142	Reverse sequence, was Testis-specific gene 10 protein OS=Homo sapiens GN=TSGA10 PE=1 SV=1	sp|REV_Q9BZW7	81 kDa	0	0	0	0	0	0	0	0	1	0	0	0	0	0	0	0	0	0	0	0	1	0	0	0	0.332827	1	1	NS	0.619135	-1.65734	NS	0.608224	-1.68344	NS
1143	LIM and calponin homology domains-containing protein 1 OS=Homo sapiens GN=LIMCH1 PE=1 SV=4	sp|Q9UPQ0	122 kDa	0	0	0	0	0	0	0	1	0	0	0	0	0	0	0	0	0	0	0	1	0	0	0	0	0.323091	0.594513	-1.71737	NS	1	1	NS	0.614835	1.66754	NS
1144	Protein FAM60A OS=Homo sapiens GN=FAM60A PE=1 SV=1	sp|Q9NP50	25 kDa	1	0	0	0	0	0	0	0	0	0	0	0	1	0	0	0	0	0	0	0	0	0	0	0	0.344071	0.604302	1.69302	NS	0.611275	1.67607	NS	1	1	NS
1145	Dynactin subunit 2 OS=Homo sapiens GN=DCTN2 PE=1 SV=4	sp|Q13561	44 kDa	0	0	0	0	0	0	1	0	0	0	0	0	0	0	0	0	0	0	1	0	0	0	0	0	0.323091	0.574011	-1.77065	NS	1	1	NS	0.594241	1.71806	NS
1146	Reverse sequence, was E3 ubiquitin-protein ligase CCNB1IP1 OS=Homo sapiens GN=CCNB1IP1 PE=1 SV=1	sp|REV_Q9NPC3	32 kDa	0	0	0	0	0	0	1	0	0	0	0	0	0	0	0	0	0	0	1	0	0	0	0	0	0.323091	0.574011	-1.77065	NS	1	1	NS	0.594241	1.71806	NS
1147	Peptidyl-prolyl cis-trans isomerase FKBP4 OS=Homo sapiens GN=FKBP4 PE=1 SV=3	sp|Q02790	52 kDa	0	0	1	0	0	0	0	0	0	0	0	0	0	0	1	0	0	0	0	0	0	0	0	0	0.344071	0.656649	1.5729	NS	0.635676	1.61915	NS	1	1	NS
1148	N-alpha-acetyltransferase 11 OS=Homo sapiens GN=NAA11 PE=1 SV=3	sp|Q9BSU3	26 kDa	0	0	1	0	0	0	0	0	0	0	0	0	0	0	1	0	0	0	0	0	0	0	0	0	0.344071	0.656649	1.5729	NS	0.635676	1.61915	NS	1	1	NS
1149	Potential tRNA (adenine(58)-N(1))-methyltransferase catalytic subunit TRMT61B OS=Homo sapiens GN=TRMT61B PE=1 SV=2	sp|Q9BVS5	53 kDa	0	0	1	0	0	0	0	0	0	0	0	0	0	0	1	0	0	0	0	0	0	0	0	0	0.344071	0.656649	1.5729	NS	0.635676	1.61915	NS	1	1	NS
1150	N-alpha-acetyltransferase 15, NatA auxiliary subunit OS=Homo sapiens GN=NAA15 PE=1 SV=1	sp|Q9BXJ9	101 kDa	0	0	0	1	0	0	0	0	0	0	0	0	0	0	0	1	0	0	0	0	0	0	0	0	0.344071	0.635958	1.61851	NS	0.63559	1.61934	NS	1	1	NS
1151	HLA class I histocompatibility antigen, B-44 alpha chain OS=Homo sapiens GN=HLA-B PE=1 SV=1	sp|P30481 (+1)	40 kDa	0	0	0	0	1	0	0	0	0	0	0	0	0	0	0	0	2	0	0	0	1	0	0	0	0.327924	0.379028	-2.27621	NS	0.619135	-1.65734	NS	0.700372	1.37236	NS
1152	Cysteine and glycine-rich protein 2 OS=Homo sapiens GN=CSRP2 PE=1 SV=3	sp|Q16527	21 kDa	0	0	0	0	1	0	0	0	0	0	0	0	0	0	0	0	1	0	0	0	0	0	0	0	0.323091	0.626124	-1.641	NS	1	1	NS	0.62219	1.65016	NS
1153	Prolyl 3-hydroxylase 1 OS=Homo sapiens GN=LEPRE1 PE=1 SV=2	sp|Q32P28	83 kDa	0	0	0	0	1	0	0	0	0	0	0	0	0	0	0	0	1	0	0	0	0	0	0	0	0.323091	0.626124	-1.641	NS	1	1	NS	0.62219	1.65016	NS
1154	N-acylneuraminate-9-phosphatase OS=Homo sapiens GN=NANP PE=1 SV=1	sp|Q8TBE9	28 kDa	0	0	0	0	0	1	0	0	0	0	0	0	0	0	0	0	0	1	0	0	0	0	0	0	0.323091	0.622503	-1.64943	NS	1	1	NS	0.607449	1.68532	NS
1155	Prostatic acid phosphatase OS=Homo sapiens GN=ACPP PE=1 SV=3	sp|P15309	45 kDa	0	0	0	0	0	1	0	0	0	0	0	0	0	0	0	0	0	1	0	0	0	0	0	0	0.323091	0.622503	-1.64943	NS	1	1	NS	0.607449	1.68532	NS
