# Supplementary material for: In-Depth Proteome Analysis Highlights HepaRG Cells as a Versatile Cell System Surrogate for Primary Human Hepatocytes
Source: Cells. 2019 Feb 21;8(2):192. doi: 10.3390/cells8020192 (PMC6406872; doi:10.3390/cells8020192)
Supplement: Supplementary file 1 [file cells-08-00192-s001.zip › Table S5_revised2.xlsx]

## Sheet: Table S5. Title
In-depth proteome analysis highlights HepaRG cells as a versatile cell system surrogate to primary human hepatocytes
Georg Tascher, Audrey Burban, Sandrine Camus, Marine Plumel, Stéphanie Chanon, Remy Le Guevel, Valery Shevchenko, Alain Van Dorsselaer, Etienne Lefai, Christiane Guguen-Guillouzo and Fabrice Bertile
Table S5. Overall proteomics data in HepaRG, HepG2 and primary human hepatocytes.
On the three following Excel sheets are presented :
	Table S5A. List of all 4394 proteins analysed in HepaRG cells (intracellular proteome)
	Table S5B. Comparsion of Loess-G normalized copy N° for 3995 proteins analysed in HepaRG cells, PHH and HepG2 (intracellular proteome)
	Table S5C. List of 313 proteins analysed in the secretome of HepaRG cells

## Sheet: HepaRG Maxquant data
Table S5A. List of all 4394 proteins analysed in HepaRG cells (intracellular proteome)
Id	Protein						Master regulator node (Figure 2C and S5)	Structural hotspots (Figure 3A and 3B)			Xenobiotic Metabolism and Oxidative stress response (Figure 4 A and 4B)		Apoptosis (Figure 4C)	FOXO signaling pathway (Figure 5B)	Cholestasis (Figure 6A)	Insulin signalling/resistance (Figure 7A)	MaxQuant Information
id	Protein IDs	Majority protein IDs	Leading protein ID	Protein names	Gene names	Fasta headers	Master regulator node	Compartment	Family	b-catenin signaling pathway	Xenobiotic Metabolism Signaling	NRF2(NFE2L2)-mediated oxidative stress response	Apoptosis	Foxo signaling pathway	Bile acid metabolism	Insulin signalling/resistance	Number of proteins	Razor + unique peptides	Unique + razor sequence coverage [%]	Mol. weight [kDa]	Sequence length	Q-value	Score	Intensity GEL_1	Intensity GEL_2	Intensity GEL_3	Intensity GEL_4	Intensity LIQ_1	Intensity LIQ_2	Intensity LIQ_3	Intensity LIQ_4	Intensity LIQ_5	Intensity LIQ_6	iBAQ	nb val Gel iBAQ	iBAQ GEL median	iBAQ GEL_1	iBAQ GEL_2	iBAQ GEL_3	iBAQ GEL_4	nb val Liq iBAQ	iBAQ Liq median	iBAQ LIQ_1	iBAQ LIQ_2	iBAQ LIQ_3	iBAQ LIQ_4	iBAQ LIQ_5	iBAQ LIQ_6	LFQ intensity GEL_1
0	A0AV96	A0AV96	A0AV96	RNA-binding protein 47	RBM47	sp|A0AV96|RBM47_HUMAN RNA-binding protein 47 OS=Homo sapiens (Human) GN=RBM47 PE=1 SV=2	---	---	---	---	---	---	---	---	---	---	1	6	17.9	64.098	593	0	41.582	2362200	1543300	1226200	2474600	382050			505400	131010		359360	4	81364	98426	64302	51093	103110	3	15919	15919			21058	5458.6		2061800
1	A0AVT1	A0AVT1	A0AVT1	Ubiquitin-like modifier-activating enzyme 6	UBA6	sp|A0AVT1|UBA6_HUMAN Ubiquitin-like modifier-activating enzyme 6 OS=Homo sapiens (Human) GN=UBA6 PE=1 SV=1	---	---	---	---	---	---	---	---	---	---	1	28	41.8	117.97	1052	0	147.31	15684000	4381700	8726400	13152000	170940	165740	157790	290890	165450	168860	768990	4	195340	280070	78244	155830	234850	6	2987.45	3052.6	2959.6	2817.6	5194.5	2954.4	3015.3	12702000
2	A0FGR8	A0FGR8	A0FGR8	Extended synaptotagmin-2	ESYT2	sp|A0FGR8|ESYT2_HUMAN Extended synaptotagmin-2 OS=Homo sapiens (Human) GN=ESYT2 PE=1 SV=1	---	---	---	---	---	---	---	---	---	---	1	10	17.9	102.36	921	0	88.97	800160	1674600	2527800	1431300			310470	134100	558550	391880	170190	4	33760	17395	36404	54953	31116	4	7634.2			6749.3	2915.3	12142	8519.1	944120
3	A0MZ66	A0MZ66	A0MZ66	Shootin-1	KIAA1598	sp|A0MZ66|SHOT1_HUMAN Shootin-1 OS=Homo sapiens (Human) GN=SHTN1 PE=1 SV=4	---	---	---	---	---	---	---	---	---	---	1	13	31.1	71.639	631	0	218.11	2649200	5488600	5892600	5682200	1439900	1642100	2786900	1715400	2008900	1725300	838680	4	150955	71599	148340	159260	153570	6	46496	38915	44382	75321	46361	54295	46631	3544100
4	A1L0T0	A1L0T0	A1L0T0	Acetolactate synthase-like protein	ILVBL	sp|A1L0T0|ILVBL_HUMAN Acetolactate synthase-like protein OS=Homo sapiens (Human) GN=ILVBL PE=1 SV=2	---	---	---	---	---	---	---	---	---	---	1	12	37.7	67.867	632	0	304.51	9067800	10865000	6511800	7348800	583720	1995800	2942300	1921800	1727300	2314100	1811200	4	328330	362710	434620	260470	293950	6	78351.5	23349	79832	117690	76871	69090	92565	8478900
5	A1L188	A1L188	A1L188	Uncharacterized protein C17orf89	C17orf89	sp|A1L188|CQ089_HUMAN Uncharacterized protein C17orf89 OS=Homo sapiens (Human) GN=C17orf89 PE=4 SV=1	---	---	---	---	---	---	---	---	---	---	1	1	17.6	7.7558	74	0	14.692	701770	487590	535300	744060			281140				687460	4	154630	175440	121900	133820	186010	1	70284			70284				4450300
6	A2VDF0	A2VDF0	A2VDF0	Fucose mutarotase	FUOM	sp|A2VDF0|FUCM_HUMAN Fucose mutarotase OS=Homo sapiens (Human) GN=FUOM PE=1 SV=2	---	---	---	---	---	---	---	---	---	---	1	7	68.8	16.765	154	0	19.89	2446600	746960	487650	657960							619890	4	100352	349520	106710	69664	93995	0								10740000
7	A3KMH1	A3KMH1	A3KMH1	von Willebrand factor A domain-containing protein 8	VWA8	sp|A3KMH1|VWA8_HUMAN von Willebrand factor A domain-containing protein 8 OS=Homo sapiens (Human) GN=VWA8 PE=1 SV=2	---	---	---	---	---	---	---	---	---	---	1	16	13.9	214.82	1905	0	74.529	1918300	1526000	2156900	1536800			137460	67311	347490		69281	4	15563.5	17282	13747	19432	13845	3	1238.3			1238.3	606.4	3130.6		1972100
8	Q9Y2G9;A3KN83	Q9Y2G9;A3KN83	Q9Y2G9	Protein strawberry notch homolog 2;Protein strawberry notch homolog 1	SBNO2;SBNO1	sp|Q9Y2G9|SBNO2_HUMAN Protein strawberry notch homolog 2 OS=Homo sapiens (Human) GN=SBNO2 PE=2 SV=3;sp|A3KN83|SBNO1_HUMAN Protein strawberry notch homolog 1 OS=Homo sapiens (Human) GN=SBNO1 PE=1 SV=1	---	---	---	---	---	---	---	---	---	---	2	1	1	150.27	1366	0.0051474	2.7639				114780							2049.7	1	2049.7				2049.7	0
9	A4D1P6	A4D1P6	A4D1P6	WD repeat-containing protein 91	WDR91	sp|A4D1P6|WDR91_HUMAN WD repeat-containing protein 91 OS=Homo sapiens (Human) GN=WDR91 PE=1 SV=2	---	---	---	---	---	---	---	---	---	---	1	4	9	83.343	747	0	29.989	729350	504990	200660	771190	67932	73147	152200	117090	115380	102520	70862	4	15429.5	18234	12625	5016.6	19280	6	2723.8	1698.3	1828.7	3805.1	2927.2	2884.5	2563.1	567880
10	A5YKK6	A5YKK6	A5YKK6	CCR4-NOT transcription complex subunit 1	CNOT1	sp|A5YKK6|CNOT1_HUMAN CCR4-NOT transcription complex subunit 1 OS=Homo sapiens (Human) GN=CNOT1 PE=1 SV=2	RXRA	---	---	---	---	---	---	---	---	---	1	4	1.8	266.94	2376	0.00027563	6.3408	142780	149780	336540								5156.5	3	1227.7	1170.3	1227.7	2758.5		0
11	A6NCS6	A6NCS6	A6NCS6	Uncharacterized protein C2orf72	C2orf72	sp|A6NCS6|CB072_HUMAN Uncharacterized protein C2orf72 OS=Homo sapiens (Human) GN=C2orf72 PE=1 SV=2	---	---	---	---	---	---	---	---	---	---	1	4	21.7	30.48	295	0	33.237	229010	333410	157450	105910					225570	508280	97477	4	12076.9	14313	20838	9840.8	6619.5	2	22933					14098	31768
12	A6ND91	A6ND91	A6ND91	Putative L-aspartate dehydrogenase	ASPDH	sp|A6ND91|ASPD_HUMAN Putative L-aspartate dehydrogenase OS=Homo sapiens (Human) GN=ASPDH PE=1 SV=2	---	---	---	---	---	---	---	---	---	---	1	1	6.7	29.946	283	0.00077022	4.4626	309380	287430	276910	399850				130940	137450		110140	4	21315	22099	20531	19779	28561	2	9585.45				9352.8	9818.1
13	A6NDG6	A6NDG6	A6NDG6	Phosphoglycolate phosphatase	PGP	sp|A6NDG6|PGP_HUMAN Phosphoglycolate phosphatase OS=Homo sapiens (Human) GN=PGP PE=1 SV=1	---	---	---	---	---	---	---	---	---	---	1	7	48	34.006	321	0	58.483		381130	2380800		938070	420320	447890	682660	538620	838740	368230	2	76722		21174	132270		6	33924.5	52115	23351	24883	37926	29923	46597
14	A6NDU8	A6NDU8	A6NDU8	UPF0600 protein C5orf51	C5orf51	sp|A6NDU8|CE051_HUMAN UPF0600 protein C5orf51 OS=Homo sapiens (Human) GN=C5orf51 PE=1 SV=1	---	---	---	---	---	---	---	---	---	---	1	2	11.6	33.62	294	0	8.8667			385560								22680	1	22680			22680		0
15	A6NFI3	A6NFI3	A6NFI3	Zinc finger protein 316	ZNF316	sp|A6NFI3|ZN316_HUMAN Zinc finger protein 316 OS=Homo sapiens (Human) GN=ZNF316 PE=1 SV=1	---	---	---	---	---	---	---	---	---	---	1	2	4	108.44	1004	0.0026512	3.2673				102060							2616.9	1	2616.9				2616.9	0
16	A6NFQ2	A6NFQ2	A6NFQ2	TRPM8 channel-associated factor 2	TCAF2	sp|A6NFQ2|TCAF2_HUMAN TRPM8 channel-associated factor 2 OS=Homo sapiens (Human) GN=TCAF2 PE=1 SV=2	---	---	---	---	---	---	---	---	---	---	1	14	30.5	100.9	919	0	45.126	3177500	2142000	1456500	3526000	474220	417200	255410	491290	776690	253730	405330	4	83117.5	99297	66938	45515	110190	6	13928	14819	13037	7981.7	15353	24272	7929.1	3433400
17	A6NH11	A6NH11	A6NH11	Glycolipid transfer protein domain-containing protein 2	GLTPD2	sp|A6NH11|GLTD2_HUMAN Glycolipid transfer protein domain-containing protein 2 OS=Homo sapiens (Human) GN=GLTPD2 PE=1 SV=2	---	---	---	---	---	---	---	---	---	---	1	2	11.3	31.641	291	0	11.092	282960	388300	136170	250570							62236	4	15692.5	16645	22841	8010	14740	0								286400
18	A6NHR9	A6NHR9	A6NHR9	Structural maintenance of chromosomes flexible hinge domain-containing protein 1	SMCHD1	sp|A6NHR9|SMHD1_HUMAN Structural maintenance of chromosomes flexible hinge domain-containing protein 1 OS=Homo sapiens (Human) GN=SMCHD1 PE=1 SV=2	---	---	---	---	---	---	---	---	---	---	1	5	4.4	226.37	2005	0	22.974	736280	314930	989780	856470		81186			131830		28537	4	7306.2	6754.8	2889.3	9080.6	7857.6	2	977.16		744.82			1209.5		649020
19	A6NIH7	A6NIH7	A6NIH7	Protein unc-119 homolog B	UNC119B	sp|A6NIH7|U119B_HUMAN Protein unc-119 homolog B OS=Homo sapiens (Human) GN=UNC119B PE=1 SV=1	---	---	---	---	---	---	---	---	---	---	1	2	13.5	28.136	251	0.00078166	4.8361		141010					370250			267170	51895	1	9400.7		9400.7			2	21247			24683			17811
20	A6NJ78	A6NJ78	A6NJ78	Probable methyltransferase-like protein 15	METTL15	sp|A6NJ78|MET15_HUMAN Probable methyltransferase-like protein 15 OS=Homo sapiens (Human) GN=METTL15 PE=1 SV=1	---	---	---	---	---	---	---	---	---	---	1	2	7.6	46.121	407	0	35.127	317990	525670	562560	541890							88551	4	24262.5	14454	23894	25571	24631	0								469210
21	A6NKT7;Q7Z3J3	A6NKT7;Q7Z3J3	A6NKT7	RanBP2-like and GRIP domain-containing protein 3;RanBP2-like and GRIP domain-containing protein 4	RGPD3;RGPD4	sp|A6NKT7|RGPD3_HUMAN RanBP2-like and GRIP domain-containing protein 3 OS=Homo sapiens (Human) GN=RGPD3 PE=3 SV=2;sp|Q7Z3J3|RGPD4_HUMAN RanBP2-like and GRIP domain-containing protein 4 OS=Homo sapiens (Human) GN=RGPD4 PE=2 SV=3	---	---	---	---	---	---	---	---	---	---	2	1	0.7	197.48	1758	0.0042583	2.9117	190540			207580							4280.9	2	2140.45	2048.8			2232.1	0								190540
22	A6QL63	A6QL63	A6QL63	Ankyrin repeat and BTB/POZ domain-containing protein BTBD11	BTBD11	sp|A6QL63|BTBDB_HUMAN Ankyrin repeat and BTB/POZ domain-containing protein BTBD11 OS=Homo sapiens (Human) GN=BTBD11 PE=2 SV=3	---	---	---	---	---	---	---	---	---	---	1	3	6.6	120.88	1104	0.0042684	2.9528				251490			484660				14723	1	5029.8				5029.8	1	9693.1			9693.1
23	A6ZKI3;Q17RB0;Q9BWD3	A6ZKI3;Q17RB0;Q9BWD3	A6ZKI3	Protein FAM127A;Protein FAM127C;Protein FAM127B	FAM127A;FAM127C;FAM127B	sp|A6ZKI3|F127A_HUMAN Protein FAM127A OS=Homo sapiens (Human) GN=FAM127A PE=1 SV=1;sp|Q17RB0|F127C_HUMAN Protein FAM127C OS=Homo sapiens (Human) GN=FAM127C PE=1 SV=1;sp|Q9BWD3|F127B_HUMAN Protein FAM127B OS=Homo sapiens (Human) GN=FAM127B PE=1 SV=3	---	---	---	---	---	---	---	---	---	---	3	2	20.4	13.171	113	0	19.918				1658200							207280	1	207280				207280	0
24	P62308;A8MWD9	P62308;A8MWD9	P62308	Small nuclear ribonucleoprotein G;Putative small nuclear ribonucleoprotein G-like protein 15	SNRPG;SNRPGP15	sp|P62308|RUXG_HUMAN Small nuclear ribonucleoprotein G OS=Homo sapiens (Human) GN=SNRPG PE=1 SV=1;sp|A8MWD9|RUXGL_HUMAN Putative small nuclear ribonucleoprotein G-like protein 15 OS=Homo sapiens (Human) GN=SNRPGP15 PE=5 SV=2	---	---	---	---	---	---	---	---	---	---	2	2	17.1	8.496	76	0	17.995	6181400	3681600	5636300	4961700							6820300	4	1766350	2060500	1227200	1878800	1653900	0								39590000
25	A8MXV4	A8MXV4	A8MXV4	Nucleoside diphosphate-linked moiety X motif 19, mitochondrial	NUDT19	sp|A8MXV4|NUD19_HUMAN Nucleoside diphosphate-linked moiety X motif 19 OS=Homo sapiens (Human) GN=NUDT19 PE=1 SV=1	---	---	---	---	---	---	---	---	---	---	1	4	20.5	42.233	375	0	20.629	221000	368550	209710	321220							65911	4	15947.5	13000	21679	12336	18895	0
26	A9UHW6	A9UHW6	A9UHW6	MIF4G domain-containing protein	MIF4GD	sp|A9UHW6|MI4GD_HUMAN MIF4G domain-containing protein OS=Homo sapiens (Human) GN=MIF4GD PE=1 SV=1	---	---	---	---	---	---	---	---	---	---	1	2	14.4	25.423	222	0.00076766	4.4095		124830		190920							21050	2	10525		8321.9		12728	0
27	B2RUZ4	B2RUZ4	B2RUZ4	Small integral membrane protein 1	SMIM1	sp|B2RUZ4|SMIM1_HUMAN Small integral membrane protein 1 OS=Homo sapiens (Human) GN=SMIM1 PE=1 SV=1	---	---	---	---	---	---	---	---	---	---	1	1	20.5	8.749	78	0.0095195	2.286	220430	250380									156940	2	78468.5	73478	83459			0								1397900
28	Q9NQA3;C4AMC7;Q6VEQ5	Q9NQA3;C4AMC7;Q6VEQ5	Q9NQA3	WAS protein family homolog 6;Putative WAS protein family homolog 3;WAS protein family homolog 2	WASH6P;WASH3P;WASH2P	sp|Q9NQA3|WASH6_HUMAN WAS protein family homolog 6 OS=Homo sapiens (Human) GN=WASH6P PE=1 SV=3;sp|C4AMC7|WASH3_HUMAN Putative WAS protein family homolog 3 OS=Homo sapiens (Human) GN=WASH3P PE=1 SV=2;sp|Q6VEQ5|WASH2_HUMAN WAS protein family homolog 2 OS=	---	---	---	---	---	---	---	---	---	---	3	1	3.1	47.989	447	0.0014811	3.7383	355290	356630	541560								83565	3	23775	23686	23775	36104		0								355290
39	P02768	P02768	P02768	Serum albumin	ALB	sp|P02768|ALBU_HUMAN Serum albumin OS=Homo sapiens (Human) GN=ALB PE=1 SV=2	HNF1A	---	---	---	---	---	---	---	---	---	2	51	72.9	69.366	609	0	323.31	199120000	165160000	202940000	188610000	70043000	61877000	70263000	61475000	57065000	62938000	31652000	4	5385100	5531000	4587800	5637300	5239200	6	1733550	1945600	1718800	1951700	1707600	1585100	1748300	314240000
42	P05787;CON__H-INV:HIT000292931;CON__H-INV:HIT000016045;CON__REFSEQ:XP_092267;CON__Q9DCV7;CON__Q3KNV1;CON__P08729;CON__Q14CN4-1;CON__Q6IME9;CON__Q3SY84;CON__Q7RTS7;CON__Q32MB2;CON__Q9NSB2;CON__Q6ISB0;P08729;Q14CN4;Q3SY84;Q7RTS7;Q86Y46;Q9NSB2	P05787	P05787	Keratin, type II cytoskeletal 8	KRT8	sp|P05787|K2C8_HUMAN Keratin, type II cytoskeletal 8 OS=Homo sapiens (Human) GN=KRT8 PE=1 SV=7;	HNF4A	---	---	---	---	---	---	---	---	---	21	26	45.8	53.704	483	0	266.45	18358000	29425000	26137000	26062000	4216300	5200600	11194000	5818700	6756400	7365700	4846000	4	899990	633050	1014700	901280	898700	6	216810	145390	179330	385990	200640	232980	253990	49710000
60	Q13765;E9PAV3;Q9BZK3	Q13765;E9PAV3	Q13765	Nascent polypeptide-associated complex subunit alpha;Nascent polypeptide-associated complex subunit alpha, muscle-specific form	NACA	sp|Q13765|NACA_HUMAN Nascent polypeptide-associated complex subunit alpha OS=Homo sapiens (Human) GN=NACA PE=1 SV=1;sp|E9PAV3|NACAM_HUMAN Nascent polypeptide-associated complex subunit alpha, muscle-specific form OS=Homo sapiens (Human) GN=NACA PE=1 SV=1	---	---	---	---	---	---	---	---	---	---	3	7	34.9	23.384	215	0	177.07	6171400	6469200	6281900	5969500	823730	1843800	1011400	1745600	1908800	1883100	5684700	4	1037800	1028600	1078200	1047000	994920	6	299115	137290	307300	168560	290930	318130	313840	7065400
61	O00115	O00115	O00115	Deoxyribonuclease-2-alpha	DNASE2	sp|O00115|DNS2A_HUMAN Deoxyribonuclease-2-alpha OS=Homo sapiens (Human) GN=DNASE2 PE=1 SV=2	---	---	---	---	---	---	---	---	---	---	1	5	20.8	39.58	360	0	46.086	267890		709660	980440	204710	1522600	262000	80219	362420	253860	331700	3	50690	19135		50690	70031	6	18423.5	14622	108750	18714	5729.9	25887	18133	3478500
62	O00116	O00116	O00116	Alkyldihydroxyacetonephosphate synthase, peroxisomal	AGPS	sp|O00116|ADAS_HUMAN Alkyldihydroxyacetonephosphate synthase, peroxisomal OS=Homo sapiens (Human) GN=AGPS PE=1 SV=1	---	---	---	---	---	---	---	---	---	---	1	19	39.4	72.911	658	0	234.92	5908600	4028300	4415400	7418600	570460	1198400	1403400	1569200	507960	1279300	808560	4	147490	168820	115090	126160	211960	6	35395.5	16299	34241	40098	44835	14513	36550	6231600
63	O00139;Q8N4N8	O00139	O00139	Kinesin-like protein KIF2A	KIF2A	sp|O00139|KIF2A_HUMAN Kinesin-like protein KIF2A OS=Homo sapiens (Human) GN=KIF2A PE=1 SV=3	---	Cytoskeleton	Kinesin	---	---	---	---	---	---	---	2	5	10.5	79.954	706	0	19.424	739450	80883	642720	247190							48864	4	12713.3	21127	2310.9	18364	7062.7	0								488710
64	O00142	O00142	O00142	Thymidine kinase 2, mitochondrial	TK2	sp|O00142|KITM_HUMAN Thymidine kinase 2, mitochondrial OS=Homo sapiens (Human) GN=TK2 PE=1 SV=4	---	---	---	---	---	---	---	---	---	---	1	2	13.2	31.004	265	0.0014833	3.7572			344240	658500							62671	2	31335.5			21515	41156	0
65	O00148	O00148	O00148	ATP-dependent RNA helicase DDX39A	DDX39A	sp|O00148|DX39A_HUMAN ATP-dependent RNA helicase DDX39A OS=Homo sapiens (Human) GN=DDX39A PE=1 SV=2	---	---	---	---	---	---	---	---	---	---	1	1	8	49.129	427	0	29.175					292540	322110			314120	337710	66657	0						4	16743	15397	16953			16533	17774
66	O00151	O00151	O00151	PDZ and LIM domain protein 1	PDLIM1	sp|O00151|PDLI1_HUMAN PDZ and LIM domain protein 1 OS=Homo sapiens (Human) GN=PDLIM1 PE=1 SV=4	---	---	---	---	---	---	---	---	---	---	1	17	72.9	36.071	329	0	323.31	12235000	14632000	12749000	7053900	10961000	10555000	7057300	5749700	12208000	8728700	6370700	4	780745	764710	914510	796780	440870	6	602620	685090	659690	441080	359350	763020	545550	18294000
67	O00154	O00154	O00154	Cytosolic acyl coenzyme A thioester hydrolase	ACOT7	sp|O00154|BACH_HUMAN Cytosolic acyl coenzyme A thioester hydrolase OS=Homo sapiens (Human) GN=ACOT7 PE=1 SV=3	---	---	---	---	---	---	---	---	---	---	1	3	10.3	41.796	380	0	29.441	580300	690080	769020	549660	657640	172520	501860	382800	386870	398060	254440	4	31759.5	29015	34504	38451	27483	6	19623	32882	8625.9	25093	19140	19343	19903	792240
68	O00159	O00159	O00159	Unconventional myosin-Ic	MYO1C	sp|O00159|MYO1C_HUMAN Unconventional myosin-Ic OS=Homo sapiens (Human) GN=MYO1C PE=1 SV=4	---	---	---	---	---	---	---	---	---	---	1	35	44.5	121.68	1063	0	241.19	9436400	14076000	22433000	10774000	370880	337220	1104800	663550	583780	241080	1071800	4	221875	168510	251350	400580	192400	6	8523.95	6622.9	6021.9	19728	11849	10425	4305	11373000
69	O00161	O00161	O00161	Synaptosomal-associated protein 23	SNAP23	sp|O00161|SNP23_HUMAN Synaptosomal-associated protein 23 OS=Homo sapiens (Human) GN=SNAP23 PE=1 SV=1	---	---	---	---	---	---	---	---	---	---	1	4	22.3	23.354	211	0	29.267	700610	145920	1002200	662260	342530	240920	280880	235930	238940	349980	350020	4	56786	58384	12160	83519	55188	6	21742	28544	20077	23407	19661	19912	29165	2664200
70	O00165	O00165	O00165	HCLS1-associated protein X-1	HAX1	sp|O00165|HAX1_HUMAN HCLS1-associated protein X-1 OS=Homo sapiens (Human) GN=HAX1 PE=1 SV=2	NFE2L2	---	---	---	---	---	---	---	---	---	1	2	17.6	31.62	279	0.0051571	2.7847	476420	213710						57363			43970	2	20298	28025	12571			1	3374.3				3374.3			611680
71	O00170	O00170	O00170	AH receptor-interacting protein	AIP	sp|O00170|AIP_HUMAN AH receptor-interacting protein OS=Homo sapiens (Human) GN=AIP PE=1 SV=2	HNF4A	---	---	---	AIP	---	---	---	---	---	1	6	26.7	37.636	330	0	11.282	293410		654220		267670			1158400	192480	645710	178440	2	26323.5	16301		36346		4	25372	14871			64358	10694	35873
72	O00178	O00178	O00178	GTP-binding protein 1	GTPBP1	sp|O00178|GTPB1_HUMAN GTP-binding protein 1 OS=Homo sapiens (Human) GN=GTPBP1 PE=1 SV=3	---	---	---	---	---	---	---	---	---	---	1	2	3.7	72.453	669	0.0026493	3.2652	176440			102170							9287.2	2	4643.6	5881.4			3405.8	0								185270
73	O00186	O00186	O00186	Syntaxin-binding protein 3	STXBP3	sp|O00186|STXB3_HUMAN Syntaxin-binding protein 3 OS=Homo sapiens (Human) GN=STXBP3 PE=1 SV=2	---	---	---	---	---	---	---	---	---	---	1	10	26.9	67.764	592	0	65.058	2720700	2554000	3130600	3855100	86409	219250	134010	182960	213650	220280	443890	4	97519	90688	85133	104350	128500	6	6610.15	2880.3	7308.2	4467.1	6098.6	7121.7	7342.8	3183600
74	O00192	O00192	O00192	Armadillo repeat protein deleted in velo-cardio-facial syndrome	ARVCF	sp|O00192|ARVC_HUMAN Armadillo repeat protein deleted in velo-cardio-facial syndrome OS=Homo sapiens (Human) GN=ARVCF PE=1 SV=1	---	---	---	---	---	---	---	---	---	---	1	2	5.9	104.64	962	0	17.435	266350			151800							8363	2	4181.5	5327			3036	0								205630
75	O00193	O00193	O00193	Small acidic protein	SMAP	sp|O00193|SMAP_HUMAN Small acidic protein OS=Homo sapiens (Human) GN=SMAP PE=1 SV=1	---	---	---	---	---	---	---	---	---	---	1	4	26.8	20.332	183	0	65.756	113060	185450	93731	159720	1863200	524060	1880300	1201400	1460900	1888300	1874000	4	27278.5	22612	37090	18746	31945	6	332420	372650	104810	376060	240270	292190	377660	748830
76	O00194	O00194	O00194	Ras-related protein Rab-27B	RAB27B	sp|O00194|RB27B_HUMAN Ras-related protein Rab-27B OS=Homo sapiens (Human) GN=RAB27B PE=1 SV=4	---	Trafficking	Rab	---	---	---	---	---	---	---	1	4	20.6	24.608	218	0	31.146	1172300	590820	601870	1088000							265610	4	64996.5	90174	45447	46298	83695	0								2016600
77	O00203;Q13367	O00203	O00203	AP-3 complex subunit beta-1	AP3B1	sp|O00203|AP3B1_HUMAN AP-3 complex subunit beta-1 OS=Homo sapiens (Human) GN=AP3B1 PE=1 SV=3	---	---	---	---	---	---	---	---	---	---	2	23	28.1	121.32	1094	0	112.79	12033000	4247400	4555900	6129800			185250		174350	188050	500260	4	97142.5	218790	77225	82835	111450	3	3368.3			3368.3		3170.1	3419	7903400
78	O00217	O00217	O00217	NADH dehydrogenase [ubiquinone] iron-sulfur protein 8, mitochondrial	NDUFS8	sp|O00217|NDUS8_HUMAN NADH dehydrogenase [ubiquinone] iron-sulfur protein 8, mitochondrial OS=Homo sapiens (Human) GN=NDUFS8 PE=1 SV=1	---	---	---	---	---	---	---	---	---	---	1	6	40	23.705	210	0	57.49	1792400	1873400	3419300	3216400	877210	806710	639990	527740	610400	884690	1126800	4	195765	137880	144110	263020	247420	6	55642	67478	62054	49230	40595	46954	68053	6515700
79	O00231	O00231	O00231	26S proteasome non-ATPase regulatory subunit 11	PSMD11	sp|O00231|PSD11_HUMAN 26S proteasome non-ATPase regulatory subunit 11 OS=Homo sapiens (Human) GN=PSMD11 PE=1 SV=3	NFE2L2	Degradation	Ubiquitin proteasome system (UPS)	---	---	---	---	---	---	---	1	13	38.6	47.463	422	0	87.108	6298500	5443900	8004800	4443700	1095400	916680	2006500	436390		2231700	1143600	4	217450	233280	201620	296470	164580	5	40569	40569	33951	74315	16162		82654	10261000
80	O00232	O00232	O00232	26S proteasome non-ATPase regulatory subunit 12	PSMD12	sp|O00232|PSD12_HUMAN 26S proteasome non-ATPase regulatory subunit 12 OS=Homo sapiens (Human) GN=PSMD12 PE=1 SV=3	---	Degradation	Ubiquitin proteasome system (UPS)	---	---	---	---	---	---	---	1	17	48.2	52.904	456	0	153.35	4118000	10105000	11801000	9507700	338240	508440	333430	158590	607050	327900	1512200	4	392255	164720	404200	472030	380310	6	13433.5	13530	20338	13337	6343.8	24282	13116	11519000
81	O00233	O00233	O00233	26S proteasome non-ATPase regulatory subunit 9	PSMD9	sp|O00233|PSMD9_HUMAN 26S proteasome non-ATPase regulatory subunit 9 OS=Homo sapiens (Human) GN=PSMD9 PE=1 SV=3	---	Degradation	Ubiquitin proteasome system (UPS)	---	---	---	---	---	---	---	1	4	21.1	24.682	223	0	24.125			511550	206280	180110	694510	138970		133970	153600	168250	2	29909.5			42629	17190	5	12800	15009	57876	11581		11164	12800
82	O00244	O00244	O00244	Copper transport protein ATOX1	ATOX1	sp|O00244|ATOX1_HUMAN Copper transport protein ATOX1 OS=Homo sapiens (Human) GN=ATOX1 PE=1 SV=1	SREBF1	---	---	---	---	---	---	---	---	---	1	5	77.9	7.4016	68	0	21.527	1778300	118170	2204600	778100	2617900	2047100	434370	2730300	3091200	2884200	4671100	4	319555	444580	29543	551160	194530	6	668515	654470	511780	108590	682560	772800	721060	6910400
83	O00264	O00264	O00264	Membrane-associated progesterone receptor component 1	PGRMC1	sp|O00264|PGRC1_HUMAN Membrane-associated progesterone receptor component 1 OS=Homo sapiens (Human) GN=PGRMC1 PE=1 SV=3	---	---	---	---	---	---	---	---	---	---	1	10	54.4	21.671	195	0	230.88	10368000	6201100	6999200	10484000	2237400	2108600	1356200	2433200	1262600	1290600	5592600	4	1085445	1296000	775130	874890	1310500	6	216555	279670	263580	169530	304150	157830	161320	20529000
84	O00267	O00267	O00267	Transcription elongation factor SPT5	SUPT5H	sp|O00267|SPT5H_HUMAN Transcription elongation factor SPT5 OS=Homo sapiens (Human) GN=SUPT5H PE=1 SV=1	HNF4A	---	---	---	---	---	---	---	---	---	1	8	14.7	121	1087	0	50.98	1006500	709530	766540	915780	1145900		71925		71896		91924	4	16493	19736	13912	15030	17956	3	1410.3	22469		1410.3		1409.7		1021800
85	O00273	O00273	O00273	DNA fragmentation factor subunit alpha	DFFA	sp|O00273|DFFA_HUMAN DNA fragmentation factor subunit alpha OS=Homo sapiens (Human) GN=DFFA PE=1 SV=1	---	---	---	---	---	---	---	---	---	---	1	5	25.1	36.521	331	0	29.563	471990	716670	93095		509650	326820	506100	514110	337280	458480	218570	3	26222	26222	39815	5172		6	26794	28314	18157	28117	28562	18738	25471
86	O00291	O00291	O00291	Huntingtin-interacting protein 1	HIP1	sp|O00291|HIP1_HUMAN Huntingtin-interacting protein 1 OS=Homo sapiens (Human) GN=HIP1 PE=1 SV=5	---	---	---	---	---	---	---	---	---	---	1	5	9.4	116.22	1037	0	16.833	627220		166280	850300		115390		106960			32740	3	11004	11004		2917.2	14918	2	1950.5		2024.5		1876.5			615820
87	O00299	O00299	O00299	Chloride intracellular channel protein 1	CLIC1	sp|O00299|CLIC1_HUMAN Chloride intracellular channel protein 1 OS=Homo sapiens (Human) GN=CLIC1 PE=1 SV=4	---	---	---	---	---	---	---	---	---	---	1	16	81.3	26.922	241	0	323.31	35878000	40611000	28756000	31932000	10642000	8620300	6007100	11028000	10265000	12754000	13100000	4	2260350	2391900	2707400	1917100	2128800	6	696915	709480	574680	400470	735190	684350	850250	60537000
88	O00303	O00303	O00303	Eukaryotic translation initiation factor 3 subunit F	EIF3F	sp|O00303|EIF3F_HUMAN Eukaryotic translation initiation factor 3 subunit F OS=Homo sapiens (Human) GN=EIF3F PE=1 SV=1	---	---	---	---	---	---	---	---	---	---	1	8	40.9	37.563	357	0	277.08	1993000	6955000	2786800	4904300	904970	260260	307490	151880	188360	575060	1268500	4	256370	132870	463670	185790	326950	6	18925	60331	17351	20499	10125	12557	38338	3428500
89	O00338	O00338	O00338	Sulfotransferase 1C2	SULT1C2	sp|O00338|ST1C2_HUMAN Sulfotransferase 1C2 OS=Homo sapiens (Human) GN=SULT1C2 PE=1 SV=1	---	---	---	---	SULTs	---	---	---	---	---	1	4	26.4	34.88	296	0	18.13		361730	491520	1244900	448900		138850	429220	147630	160520	180170	3	25870		19038	25870	65519	5	8448.2	23627		7308	22591	7770	8448.2
90	O00399	O00399	O00399	Dynactin subunit 6	DCTN6	sp|O00399|DCTN6_HUMAN Dynactin subunit 6 OS=Homo sapiens (Human) GN=DCTN6 PE=1 SV=1	---	---	---	---	---	---	---	---	---	---	1	3	35.8	20.747	190	0.00079302	5.1615		277430					170010		164000		87347	1	39632		39632			2	23857.5			24287		23428
91	O00400	O00400	O00400	Acetyl-coenzyme A transporter 1	SLC33A1	sp|O00400|ACATN_HUMAN Acetyl-coenzyme A transporter 1 OS=Homo sapiens (Human) GN=SLC33A1 PE=1 SV=1	---	---	---	---	---	---	---	---	---	---	1	1	2.6	60.908	549	0.0014929	3.8841		248680	278750								25116	2	12558		11842	13274		0
92	O00401	O00401	O00401	Neural Wiskott-Aldrich syndrome protein	WASL	sp|O00401|WASL_HUMAN Neural Wiskott-Aldrich syndrome protein OS=Homo sapiens (Human) GN=WASL PE=1 SV=2	---	---	---	---	---	---	---	---	---	---	1	4	16.2	54.826	505	0	12.663	192010	104220	180470	224530	149080		233940				47141	4	8097.5	8348.5	4531.3	7846.5	9762.1	2	8326.4	6481.8		10171				211670
93	O00410	O00410	O00410	Importin-5	IPO5	sp|O00410|IPO5_HUMAN Importin-5 OS=Homo sapiens (Human) GN=IPO5 PE=1 SV=4	---	---	---	---	---	---	---	---	---	---	1	37	55.8	123.63	1097	0	323.31	17020000	14029000	13460000	20061000	1456100	1250800	1486800	2561300	2338100	2589000	1361600	4	277225	303930	250520	240360	358230	6	34151.5	26002	22336	26550	45738	41753	46232	16931000
94	O00418	O00418	O00418	Eukaryotic elongation factor 2 kinase	EEF2K	sp|O00418|EF2K_HUMAN Eukaryotic elongation factor 2 kinase OS=Homo sapiens (Human) GN=EEF2K PE=1 SV=2	---	---	---	---	---	---	---	---	---	---	1	1	1.7	82.143	725	0.00027724	6.4491		192030	306760	352580							22404	3	8072.6		5053.4	8072.6	9278.4	0
95	O00422	O00422	O00422	Histone deacetylase complex subunit SAP18	SAP18	sp|O00422|SAP18_HUMAN Histone deacetylase complex subunit SAP18 OS=Homo sapiens (Human) GN=SAP18 PE=1 SV=1	HNF4A	---	---	---	---	---	---	---	---	---	1	2	22.9	17.561	153	0	60.102	2110800	415280	579850	107200							292100	4	45233	191890	37752	52714	9745.1	0								8550100
96	O00425	O00425	O00425	Insulin-like growth factor 2 mRNA-binding protein 3	IGF2BP3	sp|O00425|IF2B3_HUMAN Insulin-like growth factor 2 mRNA-binding protein 3 OS=Homo sapiens (Human) GN=IGF2BP3 PE=1 SV=2	---	---	---	---	---	---	---	---	---	---	1	1	2.4	63.704	579	0.0099211	2.2263			869910			314610		319510		334750	63406	1	29997			29997		3	11018		10849		11018		11543
97	O00429	O00429	O00429	Dynamin-1-like protein	DNM1L	sp|O00429|DNM1L_HUMAN Dynamin-1-like protein OS=Homo sapiens (Human) GN=DNM1L PE=1 SV=2	---	---	---	---	---	---	---	---	---	---	1	17	40.4	81.876	736	0	170.85	3816500	2770200	2245400	3653400	696560	569150	782260	716370	492390	772080	330280	4	64235.5	76329	55403	44908	73068	6	14129	13931	11383	15645	14327	9847.8	15442	3791900
98	O00442	O00442	O00442	RNA 3-terminal phosphate cyclase	RTCA	sp|O00442|RTCA_HUMAN RNA 3-terminal phosphate cyclase OS=Homo sapiens (Human) GN=RTCA PE=1 SV=1	---	---	---	---	---	---	---	---	---	---	1	6	25.4	39.336	366	0	29.246	699560	788370	1954700	519980			226070	343670		331100	255970	4	39156	36819	41493	102880	27367	3	17426			11898	18088		17426	1107300
99	O00461	O00461	O00461	Golgi integral membrane protein 4	GOLIM4	sp|O00461|GOLI4_HUMAN Golgi integral membrane protein 4 OS=Homo sapiens (Human) GN=GOLIM4 PE=1 SV=1	---	---	---	---	---	---	---	---	---	---	1	3	5.9	81.879	696	0.001484	3.7587		172130		668710							21560	2	10779.8		4413.5		17146	0
100	O00462	O00462	O00462	Beta-mannosidase	MANBA	sp|O00462|MANBA_HUMAN Beta-mannosidase OS=Homo sapiens (Human) GN=MANBA PE=2 SV=3	---	---	---	---	---	---	---	---	---	---	1	2	3.9	100.89	879	0	32.536		155820	359310	151410							16663	3	3895.4		3895.4	8982.6	3785.4	0
101	O00468	O00468	O00468	Agrin;Agrin N-terminal 110 kDa subunit;Agrin C-terminal 110 kDa subunit;Agrin C-terminal 90 kDa fragment;Agrin C-terminal 22 kDa fragment	AGRN	sp|O00468|AGRIN_HUMAN Agrin OS=Homo sapiens (Human) GN=AGRN PE=1 SV=5	---	---	---	---	---	---	---	---	---	---	1	8	7.1	217.23	2067	0	112.65					624240	1041600	1021900	622610	1045000	1087600	60476	0						6	11463.5	6936	11573	11354	6917.9	11611	12084
102	O00469	O00469	O00469	Procollagen-lysine,2-oxoglutarate 5-dioxygenase 2	PLOD2	sp|O00469|PLOD2_HUMAN Procollagen-lysine,2-oxoglutarate 5-dioxygenase 2 OS=Homo sapiens (Human) GN=PLOD2 PE=1 SV=2	---	ECM	Collagen-associated	---	---	---	---	---	---	---	1	19	33.6	84.685	737	0	209.59	5394100	6113100	7361700	4669300	1714300	1831100	2183900	1601300	1692200	2401100	874050	4	143840	134850	152830	184040	116730	6	44317	42858	45776	54598	40033	42305	60027	5864000
103	O00471	O00471	O00471	Exocyst complex component 5	EXOC5	sp|O00471|EXOC5_HUMAN Exocyst complex component 5 OS=Homo sapiens (Human) GN=EXOC5 PE=1 SV=1	---	---	---	---	---	---	---	---	---	---	1	7	18.9	81.852	708	0	117.59	1536700	638460	2026700	1968700	326550		304880	335240	321440	286750	188910	4	42748.5	37481	15572	49431	48016	5	7840	7964.5		7436.2	8176.6	7840	6993.9	1916500
104	O00483	O00483	O00483	Cytochrome c oxidase subunit NDUFA4	NDUFA4	sp|O00483|NDUA4_HUMAN Cytochrome c oxidase subunit NDUFA4 OS=Homo sapiens (Human) GN=NDUFA4 PE=1 SV=1	FOXO1	---	---	---	---	---	---	---	---	---	1	2	27.2	9.3697	81	0	22.007	11297000	21715000	1149500	11716000							7646500	4	1917800	1882900	3619200	191580	1952700	0
105	O00487	O00487	O00487	26S proteasome non-ATPase regulatory subunit 14	PSMD14	sp|O00487|PSDE_HUMAN 26S proteasome non-ATPase regulatory subunit 14 OS=Homo sapiens (Human) GN=PSMD14 PE=1 SV=1	---	Degradation	Ubiquitin proteasome system (UPS)	---	---	---	---	---	---	---	1	6	52.3	34.577	310	0	101.99	1484900	2273400	894240	2472500	1046200	346600	1133300	1457700	1039800	1558000	913780	4	125278	98996	151560	59616	164830	6	72650.5	69750	23107	75551	97182	69320	103870	3581500
106	O00488	O00488	O00488	Zinc finger protein 593	ZNF593	sp|O00488|ZN593_HUMAN Zinc finger protein 593 OS=Homo sapiens (Human) GN=ZNF593 PE=1 SV=2	---	---	---	---	---	---	---	---	---	---	1	1	10.4	15.199	134	0.00078064	4.786				74713							12452	1	12452				12452	0
107	O00499	O00499	O00499	Myc box-dependent-interacting protein 1	BIN1	sp|O00499|BIN1_HUMAN Myc box-dependent-interacting protein 1 OS=Homo sapiens (Human) GN=BIN1 PE=1 SV=1	---	---	---	---	---	---	---	---	---	---	1	12	33.2	64.699	593	0	134.8	4578200	2487100	3507700	5918400	493280	1798400	1782600	1357400	1880500	1881600	917330	4	144390	163510	88826	125270	211370	6	63946	17617	64229	63663	48478	67159	67201	4541900
108	O00505	O00505	O00505	Importin subunit alpha-4	KPNA3	sp|O00505|IMA4_HUMAN Importin subunit alpha-4 OS=Homo sapiens (Human) GN=KPNA3 PE=1 SV=2	---	---	---	---	---	---	---	---	---	---	1	7	25.1	57.81	521	0	24.054	1584800	4135500	2014200	1057500	164140	203790		203650		188700	561900	4	105851	93222	243260	118480	62205	4	11540	9655.4	11987		11980		11100	2411200
109	O00515	O00515	O00515	Ladinin-1	LAD1	sp|O00515|LAD1_HUMAN Ladinin-1 OS=Homo sapiens (Human) GN=LAD1 PE=1 SV=2	---	---	---	---	---	---	---	---	---	---	1	8	22.4	57.13	517	0	88.816	1708200	473440	2245500	622280	264130	1270500	849980	661550	249240	987170	301030	4	37589.5	55105	15272	72434	20074	6	24379.5	8520.2	40982	27419	21340	8040	31844	1472100
110	O00534	O00534	O00534	von Willebrand factor A domain-containing protein 5A	VWA5A	sp|O00534|VMA5A_HUMAN von Willebrand factor A domain-containing protein 5A OS=Homo sapiens (Human) GN=VWA5A PE=2 SV=2	---	---	---	---	---	---	---	---	---	---	1	4	8.4	86.488	786	0	8.0638	407360		301900	274180	83347						27354	3	7741	10445		7741	7030.3	1	2137.1	2137.1						289420
111	O00541	O00541	O00541	Pescadillo homolog	PES1	sp|O00541|PESC_HUMAN Pescadillo homolog OS=Homo sapiens (Human) GN=PES1 PE=1 SV=1	---	---	---	---	---	---	---	---	---	---	1	2	5.1	68.002	588	0	11.351	374800	368800	234380	279630		121970	113050		106900	111410	58997	4	11179.6	12924	12717	8081.9	9642.3	4	3869.85		4205.9	3898.1		3686	3841.6	381540
112	O00560	O00560	O00560	Syntenin-1	SDCBP	sp|O00560|SDCB1_HUMAN Syntenin-1 OS=Homo sapiens (Human) GN=SDCBP PE=1 SV=1	---	---	---	---	---	---	---	---	---	---	1	7	51.7	32.444	298	0	55.465	2366500	3181900	3384400	2456100		365640	175810	150530	177450	663130	1174700	4	256270	215130	289260	307680	223280	5	16132		33240	15983	13684	16132	60285	3990600
113	O00567	O00567	O00567	Nucleolar protein 56	NOP56	sp|O00567|NOP56_HUMAN Nucleolar protein 56 OS=Homo sapiens (Human) GN=NOP56 PE=1 SV=4	---	---	---	---	---	---	---	---	---	---	1	6	20.7	66.049	594	0	22.092	1655700	713650	1029600	673280				1172600			169190	4	28116.5	53408	23021	33212	21719	1	37826				37826			1351300
114	O00571;O15523;Q9NQI0	O00571;O15523	O00571	ATP-dependent RNA helicase DDX3X;ATP-dependent RNA helicase DDX3Y	DDX3X;DDX3Y	sp|O00571|DDX3X_HUMAN ATP-dependent RNA helicase DDX3X OS=Homo sapiens (Human) GN=DDX3X PE=1 SV=3;sp|O15523|DDX3Y_HUMAN ATP-dependent RNA helicase DDX3Y OS=Homo sapiens (Human) GN=DDX3Y PE=1 SV=2	---	---	---	---	---	---	---	---	---	---	3	19	42.1	73.243	662	0	287.05	7638000	6495400	10029000	9035200	1629500	2096600	1605600	2339200	2110300	2676800	1170700	4	213760	195850	166550	257160	231670	6	53935	41781	53760	41168	59979	54110	68636	11048000
115	O00584	O00584	O00584	Ribonuclease T2	RNASET2	sp|O00584|RNT2_HUMAN Ribonuclease T2 OS=Homo sapiens (Human) GN=RNASET2 PE=1 SV=2	---	---	---	---	---	---	---	---	---	---	1	3	16.8	29.48	256	0	11.286	1262300	1521000	611380	1441000	378260	407230	472630	384440	417470	459070	525340	4	96545.5	90161	108640	43670	102930	6	29453.5	27019	29088	33759	27460	29819	32791	5497000
116	O00625	O00625	O00625	Pirin	PIR	sp|O00625|PIR_HUMAN Pirin OS=Homo sapiens (Human) GN=PIR PE=1 SV=1	---	---	---	---	---	---	---	---	---	---	1	6	33.4	32.113	290	0	23.843	3985300	4296200	4776200	3254300	213290		198430	406480			1142000	4	276050	265690	286410	318410	216950	3	14219	14219		13229	27099			6206000
117	O00629	O00629	O00629	Importin subunit alpha-3	KPNA4	sp|O00629|IMA3_HUMAN Importin subunit alpha-3 OS=Homo sapiens (Human) GN=KPNA4 PE=1 SV=1	---	---	---	---	---	---	---	---	---	---	1	8	31.3	57.886	521	0	69.317	3615300	2981700	2555000	4686000							864870	4	206160	225960	186360	159680	292870	0								3715700
118	O00743	O00743	O00743	Serine/threonine-protein phosphatase 6 catalytic subunit;Serine/threonine-protein phosphatase 6 catalytic subunit, N-terminally processed	PPP6C	sp|O00743|PPP6_HUMAN Serine/threonine-protein phosphatase 6 catalytic subunit OS=Homo sapiens (Human) GN=PPP6C PE=1 SV=1	HNF4A	---	---	---	---	---	---	---	---	---	1	8	38.7	35.144	305	0	22.104	378560	1631200	1113200	1035200	229330			336410			295240	4	67138.5	23660	101950	69576	64701	2	17679	14333			21025			1504600
119	O00748;Q5XG92;P22303	O00748	O00748	Cocaine esterase	CES2	sp|O00748|EST2_HUMAN Cocaine esterase OS=Homo sapiens (Human) GN=CES2 PE=1 SV=1	---	---	---	---	CES1/2	---	---	---	---	---	3	17	42.6	61.806	559	0	323.31	61478000	44399000	52432000	49986000	17843000	10675000	18422000	21160000	17699000	23926000	16738000	4	2695200	3235700	2336800	2759600	2630800	6	954365	939130	561840	969600	1113700	931510	1259300	65149000
120	O00754	O00754	O00754	Lysosomal alpha-mannosidase;Lysosomal alpha-mannosidase A peptide;Lysosomal alpha-mannosidase B peptide;Lysosomal alpha-mannosidase C peptide;Lysosomal alpha-mannosidase D peptide;Lysosomal alpha-mannosidase E peptide	MAN2B1	sp|O00754|MA2B1_HUMAN Lysosomal alpha-mannosidase OS=Homo sapiens (Human) GN=MAN2B1 PE=1 SV=3	---	---	---	---	---	---	---	---	---	---	1	21	36.5	113.74	1011	0	211.19	13618000	10091000	12150000	15242000	1838700	2646300	2329900	2403500	1858800	3274100	1309000	4	257685	272360	201810	243010	304840	6	47333	36774	52926	46597	48069	37176	65481	41222000
121	O00763	O00763	O00763	Acetyl-CoA carboxylase 2;Biotin carboxylase	ACACB	sp|O00763|ACACB_HUMAN Acetyl-CoA carboxylase 2 OS=Homo sapiens (Human) GN=ACACB PE=1 SV=3	SREBF1	---	---	---	---	---	---	---	---	ACACB	1	2	2	276.54	2458	0	8.2007	460390		260520	258300							8026.3	3	2135.4	3773.7		2135.4	2117.2	0								339880
122	O00764	O00764	O00764	Pyridoxal kinase	PDXK	sp|O00764|PDXK_HUMAN Pyridoxal kinase OS=Homo sapiens (Human) GN=PDXK PE=1 SV=1	---	---	---	---	---	---	---	---	---	---	1	17	77.9	35.102	312	0	323.31	12446000	11853000	11436000	14060000	4521800	4090200	4488000	4753200	5397900	5510900	5611200	4	867810	888980	846640	816850	1004300	6	331255	322990	292160	320570	339520	385570	393640	18549000
123	O00767	O00767	O00767	Acyl-CoA desaturase	SCD	sp|O00767|ACOD_HUMAN Acyl-CoA desaturase OS=Homo sapiens (Human) GN=SCD PE=1 SV=2	SREBF1	---	---	---	---	---	---	---	---	---	1	2	10.6	41.522	359	0	68.416	315730	2071700	1026300	741460		594840	592740		586110	599580	502190	4	67989	24287	159360	78943	57035	4	45676		45757	45595		45085	46121	914330
124	O14519	O14519	O14519	Cyclin-dependent kinase 2-associated protein 1	CDK2AP1	sp|O14519|CDKA1_HUMAN Cyclin-dependent kinase 2-associated protein 1 OS=Homo sapiens (Human) GN=CDK2AP1 PE=1 SV=1	---	---	---	---	---	---	---	---	---	---	1	2	33.9	12.365	115	0.0005423	5.8016	303530	94573	177700								143950	3	44425	75882	23643	44425		0								1661400
125	O14521	O14521	O14521	Succinate dehydrogenase [ubiquinone] cytochrome b small subunit, mitochondrial	SDHD	sp|O14521|DHSD_HUMAN Succinate dehydrogenase [ubiquinone] cytochrome b small subunit, mitochondrial OS=Homo sapiens (Human) GN=SDHD PE=1 SV=1	---	---	---	---	---	---	---	---	---	---	1	2	20.8	17.043	159	0	13.062	2025100	2276700	2299000	2211700							1468700	4	374030	337510	379450	383170	368610	0								14663000
126	O14530	O14530	O14530	Thioredoxin domain-containing protein 9	TXNDC9	sp|O14530|TXND9_HUMAN Thioredoxin domain-containing protein 9 OS=Homo sapiens (Human) GN=TXNDC9 PE=1 SV=2	---	---	---	---	---	---	---	---	---	---	1	1	11.1	26.534	226	0	17.969		207440		231820							33789	2	16894.5		15957		17832	0
127	O14531	O14531	O14531	Dihydropyrimidinase-related protein 4	DPYSL4	sp|O14531|DPYL4_HUMAN Dihydropyrimidinase-related protein 4 OS=Homo sapiens (Human) GN=DPYSL4 PE=1 SV=2	---	---	---	---	---	---	---	---	---	---	1	2	7	61.877	572	0.0026641	3.3484	142740	163820		464260							24865	3	5284.6	4604.5	5284.6		14976	0								149880
128	O14545	O14545	O14545	TRAF-type zinc finger domain-containing protein 1	TRAFD1	sp|O14545|TRAD1_HUMAN TRAF-type zinc finger domain-containing protein 1 OS=Homo sapiens (Human) GN=TRAFD1 PE=1 SV=1	---	---	---	---	---	---	---	---	---	---	1	2	6.7	64.84	582	0.00027218	5.9772		126930	243840	338340			95404	215450			39229	3	9378.5		4881.9	9378.5	13013	2	5977.9			3669.4	8286.4
129	O14548	O14548	O14548	Cytochrome c oxidase subunit 7A-related protein, mitochondrial	COX7A2L	sp|O14548|COX7R_HUMAN Cytochrome c oxidase subunit 7A-related protein, mitochondrial OS=Homo sapiens (Human) GN=COX7A2L PE=1 SV=2	---	---	---	---	---	---	---	---	---	---	1	3	48.2	12.615	114	0	48.823	1348600	2117800	2763300	2864600	122110			118380			1333500	4	348655	192650	302550	394760	409230	2	17178	17444			16912			6231900
130	O14561	O14561	O14561	Acyl carrier protein, mitochondrial	NDUFAB1	sp|O14561|ACPM_HUMAN Acyl carrier protein, mitochondrial OS=Homo sapiens (Human) GN=NDUFAB1 PE=1 SV=3	---	---	---	---	---	---	---	---	---	---	1	4	17.9	17.417	156	0	50.151	2423700	1852000	3938200	3103100							1616700	4	394775	346250	264570	562590	443300	0								30541000
131	O14562	O14562	O14562	Ubiquitin domain-containing protein UBFD1	UBFD1	sp|O14562|UBFD1_HUMAN Ubiquitin domain-containing protein UBFD1 OS=Homo sapiens (Human) GN=UBFD1 PE=1 SV=2	---	---	---	---	---	---	---	---	---	---	1	2	14.2	33.382	309	0	14.851		361980	98989								41906	2	20953		32907	8999		0
132	O14579	O14579	O14579	Coatomer subunit epsilon	COPE	sp|O14579|COPE_HUMAN Coatomer subunit epsilon OS=Homo sapiens (Human) GN=COPE PE=1 SV=3	---	Trafficking	COPE (coatomer)	---	---	---	---	---	---	---	1	13	64.6	34.482	308	0	236.42	4485000	7094100	8122800	7523900	607720	446290	976330	655090	445600		2023800	4	487265	299000	472940	541520	501590	5	40515	40515	29752	65089	43673	29707		7218900
133	O14617	O14617	O14617	AP-3 complex subunit delta-1	AP3D1	sp|O14617|AP3D1_HUMAN AP-3 complex subunit delta-1 OS=Homo sapiens (Human) GN=AP3D1 PE=1 SV=1	---	---	---	---	---	---	---	---	---	---	1	3	5.2	130.16	1153	0	45.751	774950	320570	830930	1532400							67821	4	15744	15195	6285.7	16293	30047	0								927300
134	O14618	O14618	O14618	Copper chaperone for superoxide dismutase	CCS	sp|O14618|CCS_HUMAN Copper chaperone for superoxide dismutase OS=Homo sapiens (Human) GN=CCS PE=1 SV=1	---	---	---	---	---	---	---	---	---	---	1	7	31	29.04	274	0	16.143	393310	3105500	2186200	2675200	839240	954770	900460	332790	513350	882210	983310	4	186980	30254	238880	168170	205790	6	66209.5	64557	73444	69266	25599	39488	67862	2337300
135	O14639	O14639	O14639	Actin-binding LIM protein 1	ABLIM1	sp|O14639|ABLM1_HUMAN Actin-binding LIM protein 1 OS=Homo sapiens (Human) GN=ABLIM1 PE=1 SV=3	---	---	---	---	---	---	---	---	---	---	1	5	9.4	87.687	778	0	58.091	1764200	728230	1741000	2136600	384130	376420	546830	501660	596990	562380	179590	4	33704.5	33927	14004	33482	41089	6	10081.6	7387.1	7238.9	10516	9647.2	11481	10815	1942600
136	O14653	O14653	O14653	Golgi SNAP receptor complex member 2	GOSR2	sp|O14653|GOSR2_HUMAN Golgi SNAP receptor complex member 2 OS=Homo sapiens (Human) GN=GOSR2 PE=1 SV=2	---	---	---	---	---	---	---	---	---	---	1	2	17	24.775	212	0	9.1681	260360		205020	519990							109490	3	28929	28929		22780	57777	0								803810
137	O14656	O14656	O14656	Torsin-1A	TOR1A	sp|O14656|TOR1A_HUMAN Torsin-1A OS=Homo sapiens (Human) GN=TOR1A PE=1 SV=1	---	---	---	---	---	---	---	---	---	---	1	3	11.7	37.808	332	0	9.3856	166800		785640	169720				213820			78587	3	9983.6	9811.9		46214	9983.6	1	12578				12578			227720
138	O14657	O14657	O14657	Torsin-1B	TOR1B	sp|O14657|TOR1B_HUMAN Torsin-1B OS=Homo sapiens (Human) GN=TOR1B PE=1 SV=2	---	---	---	---	---	---	---	---	---	---	1	1	4.5	37.978	336	0.000762	4.2799		688030	744120								84244	2	42122		40472	43772		0
140	O14727	O14727	O14727	Apoptotic protease-activating factor 1	APAF1	sp|O14727|APAF_HUMAN Apoptotic protease-activating factor 1 OS=Homo sapiens (Human) GN=APAF1 PE=1 SV=2	FOXO3	---	---	---	---	---	APAF1	---	---	---	1	2	2.3	141.84	1248	0.00076258	4.2901	183030		148660	269170							9388.5	3	2859.9	2859.9		2322.8	4205.7	0								184480
141	O14732	O14732	O14732	Inositol monophosphatase 2	IMPA2	sp|O14732|IMPA2_HUMAN Inositol monophosphatase 2 OS=Homo sapiens (Human) GN=IMPA2 PE=1 SV=1	---	---	---	---	---	---	---	---	---	---	1	2	12.2	31.321	288	0.00028027	6.7957	519950	989430	564870	158870	186010	173410	222450				216540	4	41724	39996	76110	43452	12220	3	14309	14309	13339	17111				1739500
142	O14734	O14734	O14734	Acyl-coenzyme A thioesterase 8	ACOT8	sp|O14734|ACOT8_HUMAN Acyl-coenzyme A thioesterase 8 OS=Homo sapiens (Human) GN=ACOT8 PE=1 SV=1	---	---	---	---	---	---	---	---	ACOT8	---	1	4	18.2	35.914	319	0	8.8847	619900	385390	690290	117630							106660	4	29567.5	36465	22670	40606	6919.4	0								712500
143	O14735	O14735	O14735	CDP-diacylglycerol--inositol 3-phosphatidyltransferase	CDIPT	sp|O14735|CDIPT_HUMAN CDP-diacylglycerol--inositol 3-phosphatidyltransferase OS=Homo sapiens (Human) GN=CDIPT PE=1 SV=1	---	---	---	---	---	---	---	---	---	---	1	5	30.5	23.539	213	0	11.079	356820	1173800	1794700	564180							555640	4	124139	50974	167680	256380	80598	0								4968900
144	O14737	O14737	O14737	Programmed cell death protein 5	PDCD5	sp|O14737|PDCD5_HUMAN Programmed cell death protein 5 OS=Homo sapiens (Human) GN=PDCD5 PE=1 SV=3	---	---	---	---	---	---	---	---	---	---	1	4	36	14.285	125	0	30.555	4097500	4282500	3746600	4712400	1347600	1300500	1411100	1797000	1469900	2456300	2662100	4	419000	409750	428250	374660	471240	6	144050	134760	130050	141110	179700	146990	245630	18534000
145	O14744	O14744	O14744	Protein arginine N-methyltransferase 5;Protein arginine N-methyltransferase 5, N-terminally processed	PRMT5	sp|O14744|ANM5_HUMAN Protein arginine N-methyltransferase 5 OS=Homo sapiens (Human) GN=PRMT5 PE=1 SV=4	GATA4	---	---	---	---	---	---	---	---	---	1	6	15.5	72.683	637	0	22.861	1816500	2160400	926740	1959600	552200	681040	864290	468700		725130	317330	4	59001	56765	67514	28961	61237	5	21282	17256	21282	27009	14647		22660	2341100
146	O14745	O14745	O14745	Na(+)/H(+) exchange regulatory cofactor NHE-RF1	SLC9A3R1	sp|O14745|NHRF1_HUMAN Na(+)/H(+) exchange regulatory cofactor NHE-RF1 OS=Homo sapiens (Human) GN=SLC9A3R1 PE=1 SV=4	---	---	---	---	---	---	---	---	---	---	1	12	36	38.868	358	0	130.14	7098700	12158000	12341000	8082100	3083600	4020700	3820400	5568000	2634900	6488600	3109400	4	481910	338030	578960	587690	384860	6	186690	146840	191460	181920	265140	125470	308980	7772700
147	O14756	O14756	O14756	17-beta-hydroxysteroid dehydrogenase type 6	HSD17B6	sp|O14756|H17B6_HUMAN 17-beta-hydroxysteroid dehydrogenase type 6 OS=Homo sapiens (Human) GN=HSD17B6 PE=1 SV=1	---	---	---	---	---	---	---	---	---	---	1	11	59.9	35.965	317	0	257.63	9364700	8271200	6492700	9485500	268100	198790	181810	196510	190820	167710	2048100	4	518705	550870	486540	381930	557970	6	11392	15771	11693	10694	11559	11225	9865.4	20157000
148	O14772	O14772	O14772	Fucose-1-phosphate guanylyltransferase	FPGT	sp|O14772|FPGT_HUMAN Fucose-1-phosphate guanylyltransferase OS=Homo sapiens (Human) GN=FPGT PE=1 SV=2	---	---	---	---	---	---	---	---	---	---	1	2	6.9	66.598	594	0.0019608	3.5459	128930		181970		113450						13261	2	4857.95	4029.2		5686.7		1	3545.2	3545.2						176030
149	O14773	O14773	O14773	Tripeptidyl-peptidase 1	TPP1	sp|O14773|TPP1_HUMAN Tripeptidyl-peptidase 1 OS=Homo sapiens (Human) GN=TPP1 PE=1 SV=2	---	---	---	---	---	---	---	---	---	---	1	7	25.9	61.247	563	0	323.31	33275000	55503000	49815000	33420000	13960000	13515000	14989000	5288000	8286600	6631000	9778400	4	1734050	1386400	2312600	2075600	1392500	6	454210	581650	563140	624560	220330	345280	276290	56154000
150	O14776	O14776	O14776	Transcription elongation regulator 1	TCERG1	sp|O14776|TCRG1_HUMAN Transcription elongation regulator 1 OS=Homo sapiens (Human) GN=TCERG1 PE=1 SV=2	---	---	---	---	---	---	---	---	---	---	1	1	1	123.9	1098	0.0047136	2.8733					269280					260150	12913	0						2	6456.5	6567.8					6345.2
151	O14786	O14786	O14786	Neuropilin-1	NRP1	sp|O14786|NRP1_HUMAN Neuropilin-1 OS=Homo sapiens (Human) GN=NRP1 PE=1 SV=3	---	---	---	---	---	---	---	---	---	---	1	3	6	103.13	923	0	7.5853	938700		820240	210330	73705						49829	3	20006	22895		20006	5130.1	1	1797.7	1797.7						651600
152	O14787	O14787	O14787	Transportin-2	TNPO2	sp|O14787|TNPO2_HUMAN Transportin-2 OS=Homo sapiens (Human) GN=TNPO2 PE=1 SV=3	---	---	---	---	---	---	---	---	---	---	1	9	22.6	101.39	897	0	32.777	1102700	920510	350110	2295100				130950		107760	119690	4	24674	26896	22452	8539.3	55977	2	2911.15				3194		2628.3	1573500
153	O14817	O14817	O14817	Tetraspanin-4	TSPAN4	sp|O14817|TSN4_HUMAN Tetraspanin-4 OS=Homo sapiens (Human) GN=TSPAN4 PE=1 SV=1	---	---	---	---	---	---	---	---	---	---	1	1	10.5	26.118	238	0.0026519	3.2692	173910	152300		167980							70599	3	23997	24844	21757		23997	0								173910
154	O14818;Q8TAA3	O14818	O14818	Proteasome subunit alpha type-7	PSMA7	sp|O14818|PSA7_HUMAN Proteasome subunit alpha type-7 OS=Homo sapiens (Human) GN=PSMA7 PE=1 SV=1	---	Degradation	Ubiquitin proteasome system (UPS)	---	---	---	---	---	---	---	2	11	54.4	27.887	248	0	245.48	31379000	21532000	30754000	31258000	8069800	7529100	3984400	6396500	4530600	5181000	10758000	4	2214700	2241300	1538000	2196700	2232700	6	413480	576420	537790	284600	456890	323610	370070	74296000
155	O14828	O14828	O14828	Secretory carrier-associated membrane protein 3	SCAMP3	sp|O14828|SCAM3_HUMAN Secretory carrier-associated membrane protein 3 OS=Homo sapiens (Human) GN=SCAMP3 PE=1 SV=3	---	---	---	---	---	---	---	---	---	---	1	4	23.6	38.287	347	0	28.105	103230	422330	439790	236810	178990		173020	165560			171970	4	32957	10323	42233	43979	23681	3	17302	17899		17302	16556
156	O14832	O14832	O14832	Phytanoyl-CoA dioxygenase, peroxisomal	PHYH	sp|O14832|PAHX_HUMAN Phytanoyl-CoA dioxygenase, peroxisomal OS=Homo sapiens (Human) GN=PHYH PE=1 SV=1	---	---	---	---	---	---	---	---	---	---	1	3	10.7	38.538	338	0	7.1507		355890		1146700	380560		499860	350450	485120	490870	195240	2	39542.5		18731		60354	5	25533	20030		26308	18445	25533	25835
157	O14841	O14841	O14841	5-oxoprolinase	OPLAH	sp|O14841|OPLA_HUMAN 5-oxoprolinase OS=Homo sapiens (Human) GN=OPLAH PE=1 SV=3	---	---	---	---	---	---	---	---	---	---	1	26	36.3	137.46	1288	0	199.79	6704000	2102600	3448300	8355700	535720	289000	699050	186170	363380	184020	431470	4	95776	126490	39672	65062	157650	6	6154.6	10108	5452.9	13190	3512.6	6856.3	3472.1	5846500
158	O14874	O14874	O14874	[3-methyl-2-oxobutanoate dehydrogenase [lipoamide]] kinase, mitochondrial	BCKDK	sp|O14874|BCKD_HUMAN [3-methyl-2-oxobutanoate dehydrogenase [lipoamide]] kinase, mitochondrial OS=Homo sapiens (Human) GN=BCKDK PE=1 SV=2	---	---	---	---	---	---	---	---	---	---	1	4	17.7	46.36	412	0	37.631	1166400	2098200	2152300	1409700	539050	214960	208960	573000	215750	206910	399330	4	79725.5	53017	95372	97830	64079	6	9788.9	24502	9771	9498	26045	9806.8	9405.1	2163000
159	O14880	O14880	O14880	Microsomal glutathione S-transferase 3	MGST3	sp|O14880|MGST3_HUMAN Microsomal glutathione S-transferase 3 OS=Homo sapiens (Human) GN=MGST3 PE=1 SV=1	---	---	---	---	GSTs	GST	---	---	---	---	1	7	69.7	16.516	152	0	68.961	4889700	6246500	4764800	5317500							3031200	4	729085	698530	892360	680680	759640	0								21643000
160	O14894	O14894	O14894	Transmembrane 4 L6 family member 5	TM4SF5	sp|O14894|T4S5_HUMAN Transmembrane 4 L6 family member 5 OS=Homo sapiens (Human) GN=TM4SF5 PE=2 SV=2	---	---	---	---	---	---	---	---	---	---	1	1	12.2	20.822	197	0.0007766	4.6699	232740	291030	499210	173080							398680	4	87295	77581	97009	166400	57692	0								304470
161	O14896	O14896	O14896	Interferon regulatory factor 6	IRF6	sp|O14896|IRF6_HUMAN Interferon regulatory factor 6 OS=Homo sapiens (Human) GN=IRF6 PE=1 SV=1	GATA4	---	---	---	---	---	---	---	---	---	1	2	6.2	53.129	467	0	19.788		71823		440440	115860	141920	162210	143210	155800	171760	66810	2	12196.6		3420.1		20973	6	7119.35	5517.1	6757.9	7724.3	6819.6	7419.1	8178.8
162	O14907	O14907	O14907	Tax1-binding protein 3	TAX1BP3	sp|O14907|TX1B3_HUMAN Tax1-binding protein 3 OS=Homo sapiens (Human) GN=TAX1BP3 PE=1 SV=2	---	---	---	---	---	---	---	---	---	---	1	4	64.5	13.735	124	0	53.611	4780100	3725500	3117700	3383700							3001400	4	710920	956020	745100	623550	676740	0								21657000
163	O14910;Q9HAP6	O14910	O14910	Protein lin-7 homolog A	LIN7A	sp|O14910|LIN7A_HUMAN Protein lin-7 homolog A OS=Homo sapiens (Human) GN=LIN7A PE=1 SV=2	---	Polarisation	lin-7	---	---	---	---	---	---	---	2	7	36.5	25.996	233	0	231.56	4673000	4026200	3553900	4794300	652480	311190	584210	639380	235620	403470	1656100	4	362470	389420	335520	296160	399530	6	41153.5	54374	25932	48684	53282	19635	33623	11638000
164	O14920	O14920	O14920	Inhibitor of nuclear factor kappa-B kinase subunit beta	IKBKB	sp|O14920|IKKB_HUMAN Inhibitor of nuclear factor kappa-B kinase subunit beta OS=Homo sapiens (Human) GN=IKBKB PE=1 SV=1	FOXO3	---	---	---	---	---	---	IKBKB	IKBKB	IKBKB	1	2	3.7	86.563	756	0	9.4943	142520	97518	231110	143390							13967	4	3248.95	3239	2216.3	5252.4	3258.9	0								179100
165	O14925	O14925	O14925	Mitochondrial import inner membrane translocase subunit Tim23	TIMM23	sp|O14925|TIM23_HUMAN Mitochondrial import inner membrane translocase subunit Tim23 OS=Homo sapiens (Human) GN=TIMM23 PE=1 SV=1	---	---	---	---	---	---	---	---	---	---	1	3	28.2	21.943	209	0	33.954	626590	336800	365850	723720							228110	4	55135.5	69621	37422	40650	80413	0								1999600
166	O14933	O14933	O14933	Ubiquitin/ISG15-conjugating enzyme E2 L6	UBE2L6	sp|O14933|UB2L6_HUMAN Ubiquitin/ISG15-conjugating enzyme E2 L6 OS=Homo sapiens (Human) GN=UBE2L6 PE=1 SV=4	---	---	---	---	---	---	---	---	---	---	1	8	64.7	17.769	153	0	41.266	4103800	2496500	4346100	4287600							2176300	4	599380	586250	356640	620870	612510	0								20267000
167	O14936	O14936	O14936	Peripheral plasma membrane protein CASK	CASK	sp|O14936|CSKP_HUMAN Peripheral plasma membrane protein CASK OS=Homo sapiens (Human) GN=CASK PE=1 SV=3	---	Tight junction	protein kinase / MAGUK	---	---	---	---	---	---	---	1	15	24.9	105.12	926	0	52.103	1196600	2207100	3072700	1867300		368850	812540	318660	1446500	891170	248600	4	41576.5	24420	45044	62707	38109	5	16582		7527.6	16582	6503.3	29521	18187	1898300
168	O14949	O14949	O14949	Cytochrome b-c1 complex subunit 8	UQCRQ	sp|O14949|QCR8_HUMAN Cytochrome b-c1 complex subunit 8 OS=Homo sapiens (Human) GN=UQCRQ PE=1 SV=4	---	---	---	---	---	---	---	---	---	---	1	2	24.4	9.9062	82	0	16.06	3008500	5599400	1901700	9799000							3384800	4	717325	501420	933230	316950	1633200	0								33549000
169	O14950	O14950	O14950	Myosin regulatory light chain 12B	MYL12B	sp|O14950|ML12B_HUMAN Myosin regulatory light chain 12B OS=Homo sapiens (Human) GN=MYL12B PE=1 SV=2	---	Cytoskeleton	Myosin	---	---	---	---	---	---	---	1	13	80.2	19.779	172	0	323.31	72003000	44877000	73423000	81255000	2530300	2480400	3347800	7640700	8193600	8903800	33851000	4	8079200	8000300	4986400	8158100	9028300	6	610475	281150	275600	371980	848970	910400	989310	312830000
170	O14957	O14957	O14957	Cytochrome b-c1 complex subunit 10	UQCR11	sp|O14957|QCR10_HUMAN Cytochrome b-c1 complex subunit 10 OS=Homo sapiens (Human) GN=UQCR11 PE=3 SV=1	---	---	---	---	---	---	---	---	---	---	1	1	21.4	6.5696	56	0.0002767	6.4066	767200	209660	698170								837520	3	349080	383600	104830	349080		0								4865200
171	O14964	O14964	O14964	Hepatocyte growth factor-regulated tyrosine kinase substrate	HGS	sp|O14964|HGS_HUMAN Hepatocyte growth factor-regulated tyrosine kinase substrate OS=Homo sapiens (Human) GN=HGS PE=1 SV=1	---	---	---	---	---	---	---	---	---	---	1	7	13.3	86.191	777	0	26.116	1646100	981390	1313700	2539800	172400	196860	397830		407320	410070	322620	4	59197	65845	39256	52549	101590	5	15913	6896	7874.2	15913		16293	16403	2150300
172	O14966	O14966	O14966	Ras-related protein Rab-7L1	RAB29	sp|O14966|RAB7L_HUMAN Ras-related protein Rab-7L1 OS=Homo sapiens (Human) GN=RAB29 PE=1 SV=1	---	Trafficking	Rab	---	---	---	---	---	---	---	1	1	10.3	23.155	203	0	22.921	371630		153900	131210							54729	3	12825	30969		12825	10935	0								549690
173	O14972	O14972	O14972	Down syndrome critical region protein 3	DSCR3	sp|O14972|DSCR3_HUMAN Down syndrome critical region protein 3 OS=Homo sapiens (Human) GN=DSCR3 PE=2 SV=1	---	---	---	---	---	---	---	---	---	---	1	1	5.7	33.01	297	0	41.165	128930	173820	196720	161310							41299	4	10473	8057.9	10864	12295	10082	0								279010
174	O14974	O14974	O14974	Protein phosphatase 1 regulatory subunit 12A	PPP1R12A	sp|O14974|MYPT1_HUMAN Protein phosphatase 1 regulatory subunit 12A OS=Homo sapiens (Human) GN=PPP1R12A PE=1 SV=1	---	---	---	---	---	---	---	---	---	---	1	10	13.6	115.28	1030	0	35.859	4265600	913680	1050300	2484000	80649	442890	96037	94089			196400	4	36815.5	88866	19035	21881	51750	4	1980.5	1680.2	9226.9	2000.8	1960.2			2722800
175	O14975	O14975	O14975	Very long-chain acyl-CoA synthetase	SLC27A2	sp|O14975|S27A2_HUMAN Very long-chain acyl-CoA synthetase OS=Homo sapiens (Human) GN=SLC27A2 PE=1 SV=2	PPARA	---	---	---	---	---	---	---	---	---	1	5	19.7	70.311	620	0	63.244	747170	685650	1249300	952750	133240		154570		197320		142070	4	29309	25764	23643	43081	32854	3	5330.1	4594.4		5330.1		6804		900700
176	O14976	O14976	O14976	Cyclin-G-associated kinase	GAK	sp|O14976|GAK_HUMAN Cyclin-G-associated kinase OS=Homo sapiens (Human) GN=GAK PE=1 SV=2	---	---	---	---	---	---	---	---	---	---	1	3	6.3	143.19	1311	0	34.286	109840	181620	445210	178980	80114		83876	81259	76764	80192	22337	4	3056	1861.8	3078.4	7546	3033.6	5	1359.2	1357.9		1421.6	1377.3	1301.1	1359.2
177	O14979	O14979	O14979	Heterogeneous nuclear ribonucleoprotein D-like	HNRNPDL	sp|O14979|HNRDL_HUMAN Heterogeneous nuclear ribonucleoprotein D-like OS=Homo sapiens (Human) GN=HNRNPDL PE=1 SV=3	---	---	---	---	---	---	---	---	---	---	1	2	6	46.437	420	0	12.652					737050	963710	784750	755190	770330	827120	241910	0						6	38877	36853	48186	39237	37760	38517	41356
178	O14980	O14980	O14980	Exportin-1	XPO1	sp|O14980|XPO1_HUMAN Exportin-1 OS=Homo sapiens (Human) GN=XPO1 PE=1 SV=1	GATA4	---	---	---	---	---	---	---	---	---	1	28	39.2	123.38	1071	0	252.14	16436000	14273000	23152000	14751000	335760	375620	415690	349780	170130	162500	1328700	4	294220	310120	269310	436830	278320	6	6467.25	6335	7087.2	7843.3	6599.5	3210.1	3066	13923000
179	O15027	O15027	O15027	Protein transport protein Sec16A	SEC16A	sp|O15027|SC16A_HUMAN Protein transport protein Sec16A OS=Homo sapiens (Human) GN=SEC16A PE=1 SV=3	---	---	---	---	---	---	---	---	---	---	1	3	2.5	233.51	2179	0	8.7274	161110	281500		257460	268320		403040	316070	396220	342600	30713	3	3259	2039.3	3563.3		3259	5	4336.8	3396.5		5101.8	4000.8	5015.4	4336.8	161110
180	O15031	O15031	O15031	Plexin-B2	PLXNB2	sp|O15031|PLXB2_HUMAN Plexin-B2 OS=Homo sapiens (Human) GN=PLXNB2 PE=1 SV=3	---	---	---	---	---	---	---	---	---	---	1	21	22.5	205.12	1838	0	208.26	6556900	3562500	2215300	6761900	403830	163510	286800	427490	578900	216590	235260	4	56218.5	72854	39583	24615	75132	6	3836.8	4487	1816.8	3186.6	4749.8	6432.2	2406.6	5735400
182	O15042	O15042	O15042	U2 snRNP-associated SURP motif-containing protein	U2SURP	sp|O15042|SR140_HUMAN U2 snRNP-associated SURP motif-containing protein OS=Homo sapiens (Human) GN=U2SURP PE=1 SV=2	---	---	---	---	---	---	---	---	---	---	1	6	9.2	118.29	1029	0	23.956	1683900	276030	1115000	1358600	166140	425050	279330	159030	417410	368350	160230	4	31713	43176	7077.8	28590	34836	6	8303.65	4260	10899	7162.4	4077.6	10703	9444.9	1207000
183	O15066	O15066	O15066	Kinesin-like protein KIF3B;Kinesin-like protein KIF3B, N-terminally processed	KIF3B	sp|O15066|KIF3B_HUMAN Kinesin-like protein KIF3B OS=Homo sapiens (Human) GN=KIF3B PE=1 SV=1	---	---	---	---	---	---	---	---	---	---	1	3	5	85.124	747	0.00027964	6.7466	113560			157160	75338	85246	75240				12355	2	3301.4	2769.6			3833.2	3	1837.5	1837.5	2079.2	1835.1				119240
184	O15067	O15067	O15067	Phosphoribosylformylglycinamidine synthase	PFAS	sp|O15067|PUR4_HUMAN Phosphoribosylformylglycinamidine synthase OS=Homo sapiens (Human) GN=PFAS PE=1 SV=4	---	---	---	---	---	---	---	---	---	---	1	18	28.6	144.73	1338	0	207.32	4775200	3459700	4633900	5522400	481610	596540	616170	233970	212080	293740	359060	4	81112.5	82331	59650	79894	95213	6	6684.1	8303.7	10285	10624	4034	3656.6	5064.5	5079700
185	O15084	O15084	O15084	Serine/threonine-protein phosphatase 6 regulatory ankyrin repeat subunit A	ANKRD28	sp|O15084|ANR28_HUMAN Serine/threonine-protein phosphatase 6 regulatory ankyrin repeat subunit A OS=Homo sapiens (Human) GN=ANKRD28 PE=1 SV=5	---	---	---	---	---	---	---	---	---	---	1	4	6.4	112.96	1053	0.00054039	5.6969	442970	118720	178850	536820							35482	4	8636.55	12305	3297.7	4968.1	14912	0								345430
186	O15091	O15091	O15091	Mitochondrial ribonuclease P protein 3	KIAA0391	sp|O15091|MRRP3_HUMAN Mitochondrial ribonuclease P protein 3 OS=Homo sapiens (Human) GN=KIAA0391 PE=1 SV=2	---	---	---	---	---	---	---	---	---	---	1	1	1.5	67.315	583	0.0042523	2.8937	62743	68603		70018							6101.9	3	2078.9	1901.3	2078.9		2121.8	0								85658
187	O15116	O15116	O15116	U6 snRNA-associated Sm-like protein LSm1	LSM1	sp|O15116|LSM1_HUMAN U6 snRNA-associated Sm-like protein LSm1 OS=Homo sapiens (Human) GN=LSM1 PE=1 SV=1	---	---	---	---	---	---	---	---	---	---	1	3	36.1	15.179	133	0.0026525	3.2712	646380	551560	140310								223040	3	91927	107730	91927	23384		0								2256900
188	O15120	O15120	O15120	1-acyl-sn-glycerol-3-phosphate acyltransferase beta	AGPAT2	sp|O15120|PLCB_HUMAN 1-acyl-sn-glycerol-3-phosphate acyltransferase beta OS=Homo sapiens (Human) GN=AGPAT2 PE=1 SV=1	---	---	---	---	---	---	---	---	---	---	1	4	28.1	30.914	278	0	43.189	1551800	1328900	979120	1863500			145520	212480			506780	4	120025	129310	110740	81593	155290	2	14917			12127	17707			3227100
189	O15126	O15126	O15126	Secretory carrier-associated membrane protein 1	SCAMP1	sp|O15126|SCAM1_HUMAN Secretory carrier-associated membrane protein 1 OS=Homo sapiens (Human) GN=SCAMP1 PE=1 SV=2	---	---	---	---	---	---	---	---	---	---	1	2	11.8	37.92	338	0	12.539	110620	80420	89845		309940				288520	316120	79698	3	5989.7	7374.8	5361.4	5989.7		3	20663	20663				19235	21074	151030
190	O15143	O15143	O15143	Actin-related protein 2/3 complex subunit 1B	ARPC1B	sp|O15143|ARC1B_HUMAN Actin-related protein 2/3 complex subunit 1B OS=Homo sapiens (Human) GN=ARPC1B PE=1 SV=3	---	---	---	---	---	---	---	---	---	---	1	11	46.5	40.949	372	0	215.29	8800500	8718300	13019000	5357500	1500100	1482100	518780	1501100	1443300	1171100	2417300	4	486635	488920	484350	723310	297640	6	81262.5	83339	82340	28821	83395	80185	65059	15901000
191	O15144	O15144	O15144	Actin-related protein 2/3 complex subunit 2	ARPC2	sp|O15144|ARPC2_HUMAN Actin-related protein 2/3 complex subunit 2 OS=Homo sapiens (Human) GN=ARPC2 PE=1 SV=1	---	---	---	---	---	---	---	---	---	---	1	12	49.7	34.333	300	0	137.92	6283700	8786900	9633300	6302600	1174900	1582300	957790	995450	1426100	1856800	1950000	4	377240	314190	439350	481670	315130	6	65025	58743	79117	47889	49773	71307	92840	9579500
192	O15145	O15145	O15145	Actin-related protein 2/3 complex subunit 3	ARPC3	sp|O15145|ARPC3_HUMAN Actin-related protein 2/3 complex subunit 3 OS=Homo sapiens (Human) GN=ARPC3 PE=1 SV=3	---	---	---	---	---	---	---	---	---	---	1	9	52.2	20.546	178	0	175.32	17086000	15773000	11931000	15768000		867370	941440	331240	563550	566360	6382900	4	1577050	1708600	1577300	1193100	1576800	5	56636		86737	94144	33124	56355	56636	64101000
193	O15155	O15155	O15155	BET1 homolog	BET1	sp|O15155|BET1_HUMAN BET1 homolog OS=Homo sapiens (Human) GN=BET1 PE=1 SV=1	---	---	---	---	---	---	---	---	---	---	1	3	50.8	13.289	118	0	73.073	2210400	2345900	565080	2641900							2587800	4	759395	736810	781980	188360	880620	0								9216500
194	O15160	O15160	O15160	DNA-directed RNA polymerases I and III subunit RPAC1	POLR1C	sp|O15160|RPAC1_HUMAN DNA-directed RNA polymerases I and III subunit RPAC1 OS=Homo sapiens (Human) GN=POLR1C PE=1 SV=1	---	---	---	---	---	---	---	---	---	---	1	4	22.3	39.249	346	0	17.392		464660	588160	152130	212450	198150	217560	215240	202180	219360	145290	3	27333		27333	34598	8948.6	6	12579	12497	11656	12798	12661	11893	12903
195	O15164	O15164	O15164	Transcription intermediary factor 1-alpha	TRIM24	sp|O15164|TIF1A_HUMAN Transcription intermediary factor 1-alpha OS=Homo sapiens (Human) GN=TRIM24 PE=1 SV=3	---	---	---	---	---	---	---	---	---	---	1	1	2.8	116.83	1050	0.00125	3.9731				150160							2589	1	2589				2589	0
196	O15173	O15173	O15173	Membrane-associated progesterone receptor component 2	PGRMC2	sp|O15173|PGRC2_HUMAN Membrane-associated progesterone receptor component 2 OS=Homo sapiens (Human) GN=PGRMC2 PE=1 SV=1	---	---	---	---	---	---	---	---	---	---	1	7	39.5	23.818	223	0	95.027	4493100	7721300	5759400	6816200	209170						2777700	4	698645	499230	857920	639930	757360	1	23241	23241						11346000
197	O15212	O15212	O15212	Prefoldin subunit 6	PFDN6	sp|O15212|PFD6_HUMAN Prefoldin subunit 6 OS=Homo sapiens (Human) GN=PFDN6 PE=1 SV=1	---	---	---	---	---	---	---	---	---	---	1	3	25.6	14.582	129	0	7.8288		81147	100420	172210		206930			139080	141110	105110	3	12553		10143	12553	21526	3	17638		25867			17385	17638
198	O15228	O15228	O15228	Dihydroxyacetone phosphate acyltransferase	GNPAT	sp|O15228|GNPAT_HUMAN Dihydroxyacetone phosphate acyltransferase OS=Homo sapiens (Human) GN=GNPAT PE=1 SV=1	---	---	---	---	---	---	---	---	---	---	1	3	9.9	77.187	680	0	9.0186		302410	554570								21974	2	10987		7754	14220		0
199	O15247	O15247	O15247	Chloride intracellular channel protein 2	CLIC2	sp|O15247|CLIC2_HUMAN Chloride intracellular channel protein 2 OS=Homo sapiens (Human) GN=CLIC2 PE=1 SV=3	---	---	---	---	---	---	---	---	---	---	1	7	41.3	28.356	247	0	64.027	1197900	1042100	1437400	447550	76405		174820				312590	4	80003	85567	74439	102670	31968	2	8972.25	5457.5		12487				1857100
200	O15254	O15254	O15254	Peroxisomal acyl-coenzyme A oxidase 3	ACOX3	sp|O15254|ACOX3_HUMAN Peroxisomal acyl-coenzyme A oxidase 3 OS=Homo sapiens (Human) GN=ACOX3 PE=1 SV=2	---	---	---	---	---	---	---	---	---	---	1	8	17.1	77.628	700	0	42.663	825420	2170100	1587600	1120300							135800	4	32237.5	19653	51669	37801	26674	0								1367600
201	O15258	O15258	O15258	Protein RER1	RER1	sp|O15258|RER1_HUMAN Protein RER1 OS=Homo sapiens (Human) GN=RER1 PE=1 SV=1	---	---	---	---	---	---	---	---	---	---	1	4	29.6	22.958	196	0	77.031	3535100	2669300	2400600	3212200							1477200	4	367590	441890	333660	300080	401520	0								6354700
202	O15260	O15260	O15260	Surfeit locus protein 4	SURF4	sp|O15260|SURF4_HUMAN Surfeit locus protein 4 OS=Homo sapiens (Human) GN=SURF4 PE=1 SV=3	---	---	---	---	---	---	---	---	---	---	1	4	20.8	30.394	269	0	36.928	4280200	2191700	4202300	5687800	137920	169890	196500	264540	329870	396180	1623400	4	385570	389110	199240	382030	517070	6	20956.5	12538	15445	17864	24049	29988	36016	6119800
203	O15269	O15269	O15269	Serine palmitoyltransferase 1	SPTLC1	sp|O15269|SPTC1_HUMAN Serine palmitoyltransferase 1 OS=Homo sapiens (Human) GN=SPTLC1 PE=1 SV=1	---	---	---	---	---	---	---	---	---	---	1	4	14.8	52.743	473	0	33.585	746090	353730		462640	126100	128070	126520	115150	133810	130080	110580	3	22030	35528	16844		22030	6	6061.6	6004.8	6098.6	6024.6	5483.4	6371.9	6194.4	658580
204	O15294	O15294	O15294	UDP-N-acetylglucosamine--peptide N-acetylglucosaminyltransferase 110 kDa subunit	OGT	sp|O15294|OGT1_HUMAN UDP-N-acetylglucosamine--peptide N-acetylglucosaminyltransferase 110 kDa subunit OS=Homo sapiens (Human) GN=OGT PE=1 SV=3	RXRA	---	---	---	---	---	---	---	---	---	1	8	13.4	116.92	1046	0	53.679	3598800	792030	903000	110260	91133	82242	159630	83340	91503	92745	120090	4	16950.5	71976	15841	18060	2205.3	6	1826.4	1822.7	1644.8	3192.6	1666.8	1830.1	1854.9	1503900
205	O15305	O15305	O15305	Phosphomannomutase 2	PMM2	sp|O15305|PMM2_HUMAN Phosphomannomutase 2 OS=Homo sapiens (Human) GN=PMM2 PE=1 SV=1	---	---	---	---	---	---	---	---	---	---	1	10	46.7	28.082	246	0	56.61	2639400	7726600	6383100	5552200	890890	652870	919490	923230	832530	945210	1716600	4	372975	164970	482910	398940	347010	6	56574.5	55681	40804	57468	57702	52033	59076	12235000
206	O15320;Q96RT6;A4FU28	O15320	O15320	cTAGE family member 5	CTAGE5	sp|O15320|CTGE5_HUMAN cTAGE family member 5 OS=Homo sapiens (Human) GN=CTAGE5 PE=1 SV=4	---	---	---	---	---	---	---	---	---	---	3	10	17.8	90.995	804	0	77.452	1195300	647910	120010	3223300							117870	4	20945	27165	14725	2727.6	73256	0								1092200
207	O15347	O15347	O15347	High mobility group protein B3	HMGB3	sp|O15347|HMGB3_HUMAN High mobility group protein B3 OS=Homo sapiens (Human) GN=HMGB3 PE=1 SV=4	---	---	---	---	---	---	---	---	---	---	1	7	29.5	22.98	200	0	15.42	2216700	2683300	1880400	3602200			407100	495550	249490	230330	1960800	4	408330	369440	447220	313400	600360	4	54716			67850	82591	41582	38388	5580600
208	O15355	O15355	O15355	Protein phosphatase 1G	PPM1G	sp|O15355|PPM1G_HUMAN Protein phosphatase 1G OS=Homo sapiens (Human) GN=PPM1G PE=1 SV=1	---	---	---	---	---	---	---	---	---	---	1	6	22.3	59.271	546	0	68.516	931030	626450	703490	730390	283690	331480	559510	321850	394070	557860	217590	4	28678	37241	25058	28140	29216	6	14511	11348	13259	22381	12874	15763	22315	718730
209	O15357	O15357	O15357	Phosphatidylinositol 3,4,5-trisphosphate 5-phosphatase 2	INPPL1	sp|O15357|SHIP2_HUMAN Phosphatidylinositol 3,4,5-trisphosphate 5-phosphatase 2 OS=Homo sapiens (Human) GN=INPPL1 PE=1 SV=2	---	---	---	---	---	---	---	---	---	---	1	4	4.8	138.6	1258	0	13.062	903350			235100							16992	2	8495.95	13483			3508.9	0								768630
210	O15371	O15371	O15371	Eukaryotic translation initiation factor 3 subunit D	EIF3D	sp|O15371|EIF3D_HUMAN Eukaryotic translation initiation factor 3 subunit D OS=Homo sapiens (Human) GN=EIF3D PE=1 SV=1	---	---	---	---	---	---	---	---	---	---	1	15	43.1	63.972	548	0	155.17	6033400	2230400	3057500	3987500	807720	1700300	734730	629120	1151200	856050	847520	4	140900	241330	89218	122300	159500	6	33275.5	32309	68013	29389	25165	46049	34242	4963100
211	O15372	O15372	O15372	Eukaryotic translation initiation factor 3 subunit H	EIF3H	sp|O15372|EIF3H_HUMAN Eukaryotic translation initiation factor 3 subunit H OS=Homo sapiens (Human) GN=EIF3H PE=1 SV=1	---	---	---	---	---	---	---	---	---	---	1	8	34.4	39.93	352	0	150.93	925120	1918000	3128800	838010	207550	336170	247610	228960		369350	409980	4	71078	46256	95900	156440	41901	5	12380	10378	16809	12380	11448		18467	2084700
212	O15382	O15382	O15382	Branched-chain-amino-acid aminotransferase, mitochondrial	BCAT2	sp|O15382|BCAT2_HUMAN Branched-chain-amino-acid aminotransferase, mitochondrial OS=Homo sapiens (Human) GN=BCAT2 PE=1 SV=2	---	---	---	---	---	---	---	---	---	---	1	9	41.3	44.287	392	0	52.657	5584400	5188800	1931300	5830000	381020	329830	650860	443410	578660	618950	1133500	4	283510	293920	273100	101650	306840	6	26897	20054	17359	34256	23338	30456	32577	5771700
213	O15397	O15397	O15397	Importin-8	IPO8	sp|O15397|IPO8_HUMAN Importin-8 OS=Homo sapiens (Human) GN=IPO8 PE=1 SV=2	---	---	---	---	---	---	---	---	---	---	1	4	6.6	119.94	1037	0	8.8472	358170		323520	298130							19996	3	6602.4	7309.7		6602.4	6084.2	0								360340
214	O15400	O15400	O15400	Syntaxin-7	STX7	sp|O15400|STX7_HUMAN Syntaxin-7 OS=Homo sapiens (Human) GN=STX7 PE=1 SV=4	---	---	---	---	---	---	---	---	---	---	1	5	30.7	29.815	261	0	64.797	508390	995280	1187300	176880	120300	315690		117280	329880	210040	360100	4	68348.5	46217	90480	107940	16080	5	19094	10936	28699		10662	29989	19094	767460
215	O15438	O15438	O15438	Canalicular multispecific organic anion transporter 2	ABCC3	sp|O15438|MRP3_HUMAN Canalicular multispecific organic anion transporter 2 OS=Homo sapiens (Human) GN=ABCC3 PE=1 SV=3	---	Membrane Transporters (ABC)	MRP	---	ABCC3 (MRP3)	---	---	---	ABCC3 (MRP3)	---	1	14	15.5	169.34	1527	0	96.058	6562800	2594900	2839900	2742700	254150		143000	980000	240960	264540	268110	4	45022	105850	41854	45806	44238	5	4099.2	4099.2		2306.5	15806	3886.4	4266.8	3938100
216	O15455	O15455	O15455	Toll-like receptor 3	TLR3	sp|O15455|TLR3_HUMAN Toll-like receptor 3 OS=Homo sapiens (Human) GN=TLR3 PE=1 SV=1	---	Membrane receptors	Immune- and cytokine receptor	---	---	---	---	---	---	---	1	2	3.7	103.83	904	0.00079323	5.1617	373180	147390		95924							14337	3	3427.6	8678.7	3427.6		2230.8	0								156060
217	O15460	O15460	O15460	Prolyl 4-hydroxylase subunit alpha-2	P4HA2	sp|O15460|P4HA2_HUMAN Prolyl 4-hydroxylase subunit alpha-2 OS=Homo sapiens (Human) GN=P4HA2 PE=1 SV=1	---	---	---	---	---	---	---	---	---	---	1	8	22.4	60.901	535	0	23.784	675230	2326800	1764600	628410	154650	578760	177280		350920	387330	234800	4	40663.5	22508	77559	58819	20947	5	11697	5155	19292	5909.3		11697	12911	648730
218	O15498	O15498	O15498	Synaptobrevin homolog YKT6	YKT6	sp|O15498|YKT6_HUMAN Synaptobrevin homolog YKT6 OS=Homo sapiens (Human) GN=YKT6 PE=1 SV=1	---	---	---	---	---	---	---	---	---	---	1	4	26.8	22.417	198	0	35.171	1793800	1377300	1953200	2042500							511910	4	133820	128130	98377	139510	145890	0								4501700
219	O15511	O15511	O15511	Actin-related protein 2/3 complex subunit 5	ARPC5	sp|O15511|ARPC5_HUMAN Actin-related protein 2/3 complex subunit 5 OS=Homo sapiens (Human) GN=ARPC5 PE=1 SV=3	---	---	---	---	---	---	---	---	---	---	1	5	57	16.32	151	0	87.238	10297000	9862000	9066000	10215000	640080	1159200	1687900	1968400	1480800	1518000	4789400	4	1003850	1029700	986200	906600	1021500	6	149940	64008	115920	168790	196840	148080	151800	43005000
220	O15514	O15514	O15514	DNA-directed RNA polymerase II subunit RPB4	POLR2D	sp|O15514|RPB4_HUMAN DNA-directed RNA polymerase II subunit RPB4 OS=Homo sapiens (Human) GN=POLR2D PE=1 SV=1	---	---	---	---	---	---	---	---	---	---	1	2	21.8	16.311	142	0	8.1049	275550			106480							42447	2	21223.5	30616			11831	0
221	Q6A1A2;O15530	Q6A1A2;O15530	Q6A1A2	Putative 3-phosphoinositide-dependent protein kinase 2;3-phosphoinositide-dependent protein kinase 1	PDPK2P;PDPK1	sp|Q6A1A2|PDPK2_HUMAN Putative 3-phosphoinositide-dependent protein kinase 2 OS=Homo sapiens (Human) GN=PDPK2P PE=5 SV=1;sp|O15530|PDPK1_HUMAN 3-phosphoinositide-dependent protein kinase 1 OS=Homo sapiens (Human) GN=PDPK1 PE=1 SV=1	SREBF1	---	---	---	---	---	PDPK1/2	PDPK1/2	---	PDPK1/2	2	2	8.1	44.765	396	0	18.262	243270			554060	98549	103510	139130			112200	62536	2	19933.5	12164			27703	4	5392.7	4927.5	5175.4	6956.4			5610	379630
222	O15533	O15533	O15533	Tapasin	TAPBP	sp|O15533|TPSN_HUMAN Tapasin OS=Homo sapiens (Human) GN=TAPBP PE=1 SV=1	---	---	---	---	---	---	---	---	---	---	1	1	2.9	47.625	448	0	8.8734		317990	291310	304730							65288	3	21766		22713	20808	21766	0
223	O15550	O15550	O15550	Lysine-specific demethylase 6A	KDM6A	sp|O15550|KDM6A_HUMAN Lysine-specific demethylase 6A OS=Homo sapiens (Human) GN=KDM6A PE=1 SV=2	---	---	---	---	---	---	---	---	---	---	1	1	1.2	154.17	1401	0.0093118	2.3072			95089								1509.4	1	1509.4			1509.4		0
224	O43143	O43143	O43143	Pre-mRNA-splicing factor ATP-dependent RNA helicase DHX15	DHX15	sp|O43143|DHX15_HUMAN Pre-mRNA-splicing factor ATP-dependent RNA helicase DHX15 OS=Homo sapiens (Human) GN=DHX15 PE=1 SV=2	NOTCH1	---	---	---	---	---	---	---	---	---	1	18	27.8	90.932	795	0	45.784	3775200	3542800	4471800	2605300	83491	233650	499730	327970	308180	324770	414690	4	93820.5	96799	90842	114660	66802	6	8114.8	2140.8	5991	12814	8409.4	7902.1	8327.5	3895600
225	O43148	O43148	O43148	mRNA cap guanine-N7 methyltransferase	RNMT	sp|O43148|MCES_HUMAN mRNA cap guanine-N7 methyltransferase OS=Homo sapiens (Human) GN=RNMT PE=1 SV=1	---	---	---	---	---	---	---	---	---	---	1	5	16.8	54.843	476	0	18.824	456720	122880		567950	225990	209530	120030	123860	199980		81078	3	18269	18269	4915		22718	5	7999.3	9039.4	8381.3	4801.3	4954.4	7999.3		442290
226	O43150	O43150	O43150	Arf-GAP with SH3 domain, ANK repeat and PH domain-containing protein 2	ASAP2	sp|O43150|ASAP2_HUMAN Arf-GAP with SH3 domain, ANK repeat and PH domain-containing protein 2 OS=Homo sapiens (Human) GN=ASAP2 PE=1 SV=3	---	---	---	---	---	---	---	---	---	---	1	4	6.5	111.65	1006	0	8.0241	1526600			292410							35666	2	17832.8	29932			5733.6	0								1311900
227	O43156	O43156	O43156	TELO2-interacting protein 1 homolog	TTI1	sp|O43156|TTI1_HUMAN TELO2-interacting protein 1 homolog OS=Homo sapiens (Human) GN=TTI1 PE=1 SV=3	---	---	---	---	---	---	---	---	---	---	1	4	6.5	122.07	1089	0	28.017	548770	111630	273410	324160							25159	4	5975.75	10975	2232.7	5468.3	6483.2	0								375020
228	O43159	O43159	O43159	Ribosomal RNA-processing protein 8	RRP8	sp|O43159|RRP8_HUMAN Ribosomal RNA-processing protein 8 OS=Homo sapiens (Human) GN=RRP8 PE=1 SV=2	---	---	---	---	---	---	---	---	---	---	1	1	3.5	50.714	456	0.00076923	4.4495	90593			102450			124080				12685	2	3860.85	3623.7			4098	1	4963.2			4963.2				123680
229	O43169	O43169	O43169	Cytochrome b5 type B	CYB5B	sp|O43169|CYB5B_HUMAN Cytochrome b5 type B OS=Homo sapiens (Human) GN=CYB5B PE=1 SV=2	HNF1A	---	---	---	---	---	---	---	---	---	1	2	31.5	16.332	146	0	13.781	833490			887140							286770	2	143385	138910			147860	0								1686200
230	O43172	O43172	O43172	U4/U6 small nuclear ribonucleoprotein Prp4	PRPF4	sp|O43172|PRP4_HUMAN U4/U6 small nuclear ribonucleoprotein Prp4 OS=Homo sapiens (Human) GN=PRPF4 PE=1 SV=2	HNF4A	---	---	---	---	---	---	---	---	---	1	5	13.4	58.449	522	0	11.654		138090	793380	420580							45068	3	14019		4603	26446	14019	0
231	O43175	O43175	O43175	D-3-phosphoglycerate dehydrogenase	PHGDH	sp|O43175|SERA_HUMAN D-3-phosphoglycerate dehydrogenase OS=Homo sapiens (Human) GN=PHGDH PE=1 SV=4	---	---	---	---	---	---	---	---	---	---	1	17	50.5	56.65	533	0	323.31	10649000	11097000	20539000	12709000	4628800	4852400	6640700	4933700	5972400	4104700	3588600	4	495945	443690	462370	855790	529520	6	203880	192870	202190	276700	205570	248850	171030	17076000
232	O43181	O43181	O43181	NADH dehydrogenase [ubiquinone] iron-sulfur protein 4, mitochondrial	NDUFS4	sp|O43181|NDUS4_HUMAN NADH dehydrogenase [ubiquinone] iron-sulfur protein 4, mitochondrial OS=Homo sapiens (Human) GN=NDUFS4 PE=1 SV=1	---	---	---	---	---	---	---	---	---	---	1	2	15.4	20.108	175	0	8.5242	250470	229940	549640	234710							140530	4	26954.5	27830	25549	61071	26079	0								689570
233	O43237	O43237	O43237	Cytoplasmic dynein 1 light intermediate chain 2	DYNC1LI2	sp|O43237|DC1L2_HUMAN Cytoplasmic dynein 1 light intermediate chain 2 OS=Homo sapiens (Human) GN=DYNC1LI2 PE=1 SV=1	---	---	---	---	---	---	---	---	---	---	1	5	19.5	54.099	492	0	114.94	1652000	1213800	2496700	3165800	118170	925270	491620	270670	511340	576740	439320	4	79784	63540	46685	96028	121760	6	19287.5	4545.1	35587	18908	10411	19667	22182	1989200
234	O43242	O43242	O43242	26S proteasome non-ATPase regulatory subunit 3	PSMD3	sp|O43242|PSMD3_HUMAN 26S proteasome non-ATPase regulatory subunit 3 OS=Homo sapiens (Human) GN=PSMD3 PE=1 SV=2	---	Degradation	Ubiquitin proteasome system (UPS)	---	---	---	---	---	---	---	1	15	38.4	60.977	534	0	78.316	7256800	5271100	6346100	7446300	360180	585860	784580	360590	524510	485360	865330	4	200040	213430	155030	186650	219010	6	14851	10593	17231	23076	10605	15427	14275	6374600
235	O43252	O43252	O43252	Bifunctional 3-phosphoadenosine 5-phosphosulfate synthase 1;Sulfate adenylyltransferase;Adenylyl-sulfate kinase	PAPSS1	sp|O43252|PAPS1_HUMAN Bifunctional 3-phosphoadenosine 5-phosphosulfate synthase 1 OS=Homo sapiens (Human) GN=PAPSS1 PE=1 SV=2	---	---	---	---	---	---	---	---	---	---	1	7	22.6	70.832	624	0	26.531	1664000	1219000	1352100	788740		143380					156580	4	38956.5	50423	36941	40972	23901	1	4344.7		4344.7					1395000
236	O43264	O43264	O43264	Centromere/kinetochore protein zw10 homolog	ZW10	sp|O43264|ZW10_HUMAN Centromere/kinetochore protein zw10 homolog OS=Homo sapiens (Human) GN=ZW10 PE=1 SV=3	---	---	---	---	---	---	---	---	---	---	1	7	13.7	88.828	779	0	82.541	417710	561340	634960	404650	77985						51138	4	11939.5	10188	13691	15487	9869.5	1	1902.1	1902.1						652900
237	O43272	O43272	O43272	Proline dehydrogenase 1, mitochondrial	PRODH	sp|O43272|PROD_HUMAN Proline dehydrogenase 1, mitochondrial OS=Homo sapiens (Human) GN=PRODH PE=1 SV=3	---	---	---	---	---	---	---	---	---	---	1	3	11.3	68.001	600	0	12.386	242720	168090	185960	163720	121430						25939	4	5206.7	7138.7	4943.9	5469.5	4815.3	1	3571.5	3571.5						254860
238	O43290	O43290	O43290	U4/U6.U5 tri-snRNP-associated protein 1	SART1	sp|O43290|SNUT1_HUMAN U4/U6.U5 tri-snRNP-associated protein 1 OS=Homo sapiens (Human) GN=SART1 PE=1 SV=1	---	---	---	---	---	---	---	---	---	---	1	7	12.2	90.254	800	0	75.744	1119700	759070	1197000	1612500		207230	378530	152300	258090	252390	156230	4	30484	29467	19976	31501	42434	5	6641.9		5453.3	9961.3	4007.9	6791.8	6641.9	1134100
239	O43310	O43310	O43310	CBP80/20-dependent translation initiation factor	CTIF	sp|O43310|CTIF_HUMAN CBP80/20-dependent translation initiation factor OS=Homo sapiens (Human) GN=CTIF PE=1 SV=1	---	---	---	---	---	---	---	---	---	---	1	1	2.8	67.586	598	0.0012506	3.9771			63307								1711	1	1711			1711		0
240	O43314;Q6PFW1	O43314;Q6PFW1	O43314	Inositol hexakisphosphate and diphosphoinositol-pentakisphosphate kinase 2;Inositol hexakisphosphate and diphosphoinositol-pentakisphosphate kinase 1	PPIP5K2;PPIP5K1	sp|O43314|VIP2_HUMAN Inositol hexakisphosphate and diphosphoinositol-pentakisphosphate kinase 2 OS=Homo sapiens (Human) GN=PPIP5K2 PE=1 SV=3;sp|Q6PFW1|VIP1_HUMAN Inositol hexakisphosphate and diphosphoinositol-pentakisphosphate kinase 1 OS=Homo sapiens (	---	---	---	---	---	---	---	---	---	---	2	2	3.1	140.41	1243	0	37.748	600220	363680	523650	749740	238470			284130		263350	47988	4	8919.5	9527.2	5772.7	8311.8	11901	3	4180.2	3785.3			4510		4180.2	549220
241	O43315	O43315	O43315	Aquaporin-9	AQP9	sp|O43315|AQP9_HUMAN Aquaporin-9 OS=Homo sapiens (Human) GN=AQP9 PE=2 SV=2	PPARA	---	---	---	---	---	---	---	AQP9	---	1	1	4.7	31.431	295	0	7.5273	169760	396160	318610	418360							217150	4	59564.5	28293	66027	53102	69727	0								298620
242	O43318	O43318	O43318	Mitogen-activated protein kinase kinase kinase 7	MAP3K7	sp|O43318|M3K7_HUMAN Mitogen-activated protein kinase kinase kinase 7 OS=Homo sapiens (Human) GN=MAP3K7 PE=1 SV=1	GATA4	#N/A	#N/A	MAP3K7	---	MAP3K7	---	---	MAP3K7	---	1	1	3.3	67.195	606	0.0067192	2.5779					172880		159580	153860	172510		21961	0						4	5534.9	5762.5		5319.5	5128.7	5750.3
243	O43324	O43324	O43324	Eukaryotic translation elongation factor 1 epsilon-1	EEF1E1	sp|O43324|MCA3_HUMAN Eukaryotic translation elongation factor 1 epsilon-1 OS=Homo sapiens (Human) GN=EEF1E1 PE=1 SV=1	---	---	---	---	---	---	---	---	---	---	1	7	52.9	19.81	174	0	48.201	2697200	2093800	2716700	2007400	104160	110230	124330		118360	117490	840810	4	199630	224770	174490	226390	167280	5	9790.9	8680.4	9185.7	10361		9863.6	9790.9	9486600
244	O43390	O43390	O43390	Heterogeneous nuclear ribonucleoprotein R	HNRNPR	sp|O43390|HNRPR_HUMAN Heterogeneous nuclear ribonucleoprotein R OS=Homo sapiens (Human) GN=HNRNPR PE=1 SV=1	HNF4A	---	---	---	---	---	---	---	---	---	1	7	18.2	70.942	633	0	22.824	3651300	1607900	1548800	3208400	130740	534350	374820	131410	175380	1016400	364100	4	70827.5	107390	47290	45552	94365	6	8091.15	3845.4	15716	11024	3865.1	5158.3	29894	3293100
245	O43395	O43395	O43395	U4/U6 small nuclear ribonucleoprotein Prp3	PRPF3	sp|O43395|PRPF3_HUMAN U4/U6 small nuclear ribonucleoprotein Prp3 OS=Homo sapiens (Human) GN=PRPF3 PE=1 SV=2	---	---	---	---	---	---	---	---	---	---	1	1	2.8	77.528	683	0.0012519	3.9915			184580	104960							8774.1	2	4387.05			5593.4	3180.7	0
246	O43396	O43396	O43396	Thioredoxin-like protein 1	TXNL1	sp|O43396|TXNL1_HUMAN Thioredoxin-like protein 1 OS=Homo sapiens (Human) GN=TXNL1 PE=1 SV=3	---	---	---	---	---	---	---	---	---	---	1	15	66.8	32.251	289	0	319.66	5639700	11127000	7734800	8300800	4642400	4015700	3382200	4362600	3237600	3228900	3711500	4	534515	375980	741810	515650	553380	6	246595	309490	267710	225480	290840	215840	215260	14666000
247	O43399	O43399	O43399	Tumor protein D54	TPD52L2	sp|O43399|TPD54_HUMAN Tumor protein D54 OS=Homo sapiens (Human) GN=TPD52L2 PE=1 SV=2	---	---	---	---	---	---	---	---	---	---	1	9	51.9	22.237	206	0	286.3	1649500	1808600	3717300	1430100	2809300	1381400	1158300	3115800	2904000	3096200	1922500	4	144090	137460	150720	309780	119170	6	238055	234110	115120	96526	259650	242000	258020	2866700
248	O43402	O43402	O43402	ER membrane protein complex subunit 8	EMC8	sp|O43402|EMC8_HUMAN ER membrane protein complex subunit 8 OS=Homo sapiens (Human) GN=EMC8 PE=1 SV=1	---	---	---	---	---	---	---	---	---	---	1	2	12.4	23.773	210	0.00027762	6.5108	277650	328720	665690	614320							171490	4	42865.5	25241	29884	60517	55847	0								393160
249	O43414	O43414	O43414	ERI1 exoribonuclease 3	ERI3	sp|O43414|ERI3_HUMAN ERI1 exoribonuclease 3 OS=Homo sapiens (Human) GN=ERI3 PE=1 SV=2	---	---	---	---	---	---	---	---	---	---	1	3	17.8	37.238	337	0	11.109	918400	155410		860790							120910	3	53799	57400	9713.2		53799	0								1991400
250	O43426	O43426	O43426	Synaptojanin-1	SYNJ1	sp|O43426|SYNJ1_HUMAN Synaptojanin-1 OS=Homo sapiens (Human) GN=SYNJ1 PE=1 SV=2	---	---	---	---	---	---	---	---	---	---	1	2	2.3	173.1	1573	0.005151	2.7674	494100				164480					154500	9345.7	1	5679.3	5679.3				2	1833.2	1890.5					1775.9	1069300
251	O43447	O43447	O43447	Peptidyl-prolyl cis-trans isomerase H	PPIH	sp|O43447|PPIH_HUMAN Peptidyl-prolyl cis-trans isomerase H OS=Homo sapiens (Human) GN=PPIH PE=1 SV=1	---	---	---	---	---	---	---	---	---	---	1	6	59.3	19.208	177	0	59.915	2162000	931210	1678500	1351300	109450		149220	109520			590100	4	137715	196540	84656	152590	122840	3	9956.1	9949.6		13565	9956.1			10517000
252	O43464	O43464	O43464	Serine protease HTRA2, mitochondrial	HTRA2	sp|O43464|HTRA2_HUMAN Serine protease HTRA2, mitochondrial OS=Homo sapiens (Human) GN=HTRA2 PE=1 SV=2	HNF4A	---	---	---	---	---	---	---	---	---	1	4	12.9	48.84	458	0	123.07	2021200	1055300	2677900	2453000							356840	4	97263	87876	45881	116430	106650	0								3326800
253	O43488	O43488	O43488	Aflatoxin B1 aldehyde reductase member 2	AKR7A2	sp|O43488|ARK72_HUMAN Aflatoxin B1 aldehyde reductase member 2 OS=Homo sapiens (Human) GN=AKR7A2 PE=1 SV=3	NFE2L2	---	---	---	---	AKR7A	---	---	---	---	1	9	46.2	39.589	359	0	232.83	7241200	16094000	15847000	12290000	4796000	4137000	5021500	5315400	7406700	4249800	5493300	4	937930	482740	1072900	1056500	819360	6	327250	319730	275800	334770	354360	493780	283320	16273000
254	O43491	O43491	O43491	Band 4.1-like protein 2	EPB41L2	sp|O43491|E41L2_HUMAN Band 4.1-like protein 2 OS=Homo sapiens (Human) GN=EPB41L2 PE=1 SV=1	---	---	---	---	---	---	---	---	---	---	1	5	6.5	112.59	1005	0	13.857	180190	249350	151450	423810					861010	1193600	55626	4	3904.95	3276.2	4533.7	2753.6	7705.6	2	18678.5					15655	21702	264740
255	O43504	O43504	O43504	Ragulator complex protein LAMTOR5	LAMTOR5	sp|O43504|LTOR5_HUMAN Ragulator complex protein LAMTOR5 OS=Homo sapiens (Human) GN=LAMTOR5 PE=1 SV=1	HNF4A	---	---	---	---	---	---	Ragulator	---	---	1	4	85.7	9.6138	91	0	24.904	1383700		2279500	919990		789120					1074500	3	276730	276730		455910	184000	1	157820		157820					12026000
256	O43524	O43524	O43524	Forkhead box protein O3	FOXO3	sp|O43524|FOXO3_HUMAN Forkhead box protein O3 OS=Homo sapiens (Human) GN=FOXO3 PE=1 SV=1	FOXO3; FOXO1	---	---	---	---	---	---	FOXO	---	---	1	2	6.8	71.276	673	0	14.519	176950			325620							20940	2	10469.9	7372.7			13567	0								264820
257	O43583	O43583	O43583	Density-regulated protein	DENR	sp|O43583|DENR_HUMAN Density-regulated protein OS=Homo sapiens (Human) GN=DENR PE=1 SV=2	---	---	---	---	---	---	---	---	---	---	1	6	36.4	22.092	198	0	97.726	1374400	1694300	1724900	1050800		1052000	1313300	1077300	1225400	1254900	1307500	4	170485	152710	188260	191650	116760	5	136150		116890	145930	119700	136150	139430	1789100
258	O43592	O43592	O43592	Exportin-T	XPOT	sp|O43592|XPOT_HUMAN Exportin-T OS=Homo sapiens (Human) GN=XPOT PE=1 SV=2	---	---	---	---	---	---	---	---	---	---	1	6	12.4	109.96	962	0	43.684	558000	671780	927130	282010							54198	4	13664	12400	14928	20603	6266.9	0								561070
259	O43598	O43598	O43598	2-deoxynucleoside 5-phosphate N-hydrolase 1	DNPH1	sp|O43598|DNPH1_HUMAN 2-deoxynucleoside 5-phosphate N-hydrolase 1 OS=Homo sapiens (Human) GN=DNPH1 PE=1 SV=1	---	---	---	---	---	---	---	---	---	---	1	8	67.8	19.108	174	0	197.63	3461500	3716800	4591200	5630500	373180	1929100	537790	191460	523410	2003400	2869800	4	519250	432690	464600	573900	703810	6	66325	46648	241130	67224	23933	65426	250430	3617100
260	O43615	O43615	O43615	Mitochondrial import inner membrane translocase subunit TIM44	TIMM44	sp|O43615|TIM44_HUMAN Mitochondrial import inner membrane translocase subunit TIM44 OS=Homo sapiens (Human) GN=TIMM44 PE=1 SV=2	---	---	---	---	---	---	---	---	---	---	1	10	24.6	51.355	452	0	68.47	5141400	4142700	3517000	3150900	272480	230160	448530	284150	240190	258620	609870	4	132060	177290	142850	121270	108650	6	9156.85	9395.8	7936.6	15467	9798.1	8282.6	8917.9	6717200
261	O43617	O43617	O43617	Trafficking protein particle complex subunit 3	TRAPPC3	sp|O43617|TPPC3_HUMAN Trafficking protein particle complex subunit 3 OS=Homo sapiens (Human) GN=TRAPPC3 PE=1 SV=1	---	---	---	---	---	---	---	---	---	---	1	7	45	20.274	180	0	36.687	3423400	4292000	4390100	4254700							1817800	4	474820	380370	476890	487790	472750	0								16733000
262	O43639;P16333	O43639;P16333	O43639	Cytoplasmic protein NCK2;Cytoplasmic protein NCK1	NCK2;NCK1	sp|O43639|NCK2_HUMAN Cytoplasmic protein NCK2 OS=Homo sapiens (Human) GN=NCK2 PE=1 SV=2;sp|P16333|NCK1_HUMAN Cytoplasmic protein NCK1 OS=Homo sapiens (Human) GN=NCK1 PE=1 SV=1	---	---	---	---	---	---	---	---	---	---	2	2	5.8	42.915	380	0.0014829	3.7533		445990		392090							36438	2	18219		19391		17047	0
263	O43670	O43670	O43670	BUB3-interacting and GLEBS motif-containing protein ZNF207	ZNF207	sp|O43670|ZN207_HUMAN BUB3-interacting and GLEBS motif-containing protein ZNF207 OS=Homo sapiens (Human) GN=ZNF207 PE=1 SV=1	---	---	---	---	---	---	---	---	---	---	1	4	14	50.75	478	0	28.178	1866400	408780	1228300	2017200							394330	4	110523	133310	29198	87736	144090	0								1580900
264	O43674	O43674	O43674	NADH dehydrogenase [ubiquinone] 1 beta subcomplex subunit 5, mitochondrial	NDUFB5	sp|O43674|NDUB5_HUMAN NADH dehydrogenase [ubiquinone] 1 beta subcomplex subunit 5, mitochondrial OS=Homo sapiens (Human) GN=NDUFB5 PE=1 SV=1	---	---	---	---	---	---	---	---	---	---	1	2	14.8	21.75	189	0	6.8659			161420	174120							41942	2	20971			20177	21765	0
265	O43676	O43676	O43676	NADH dehydrogenase [ubiquinone] 1 beta subcomplex subunit 3	NDUFB3	sp|O43676|NDUB3_HUMAN NADH dehydrogenase [ubiquinone] 1 beta subcomplex subunit 3 OS=Homo sapiens (Human) GN=NDUFB3 PE=1 SV=3	---	---	---	---	---	---	---	---	---	---	1	2	21.4	11.402	98	0.0056127	2.7308		326130		721230							174560	2	87282.5		54355		120210	0
266	O43678	O43678	O43678	NADH dehydrogenase [ubiquinone] 1 alpha subcomplex subunit 2	NDUFA2	sp|O43678|NDUA2_HUMAN NADH dehydrogenase [ubiquinone] 1 alpha subcomplex subunit 2 OS=Homo sapiens (Human) GN=NDUFA2 PE=1 SV=3	---	---	---	---	---	---	---	---	---	---	1	3	41.4	10.921	99	0	57.529	3067500	1515700	4142900	5364200	407600				393420		2481900	4	600870	511250	252610	690490	894040	2	66751.5	67933				65570		25808000
267	O43681	O43681	O43681	ATPase ASNA1	ASNA1	sp|O43681|ASNA_HUMAN ATPase ASNA1 OS=Homo sapiens (Human) GN=ASNA1 PE=1 SV=2	---	---	---	---	---	---	---	---	---	---	1	7	30.7	38.792	348	0	43.401	2704600	4041700	3773800	1711900	1480500	1311100	754780	1478200	899950	1402500	1303900	4	215940	180300	269450	251580	114130	6	90454.5	98700	87406	50319	98545	59997	93503	4434800
268	O43684	O43684	O43684	Mitotic checkpoint protein BUB3	BUB3	sp|O43684|BUB3_HUMAN Mitotic checkpoint protein BUB3 OS=Homo sapiens (Human) GN=BUB3 PE=1 SV=1	---	---	---	---	---	---	---	---	---	---	1	8	25.9	37.154	328	0	37.31	1708200	1841800	1330200	2569300	699800	352070	383710	365280	769890	865870	725730	4	118330	113880	122780	88677	171290	6	36117	46653	23471	25581	24352	51326	57725	2549500
269	O43704	O43704	O43704	Sulfotransferase family cytosolic 1B member 1	SULT1B1	sp|O43704|ST1B1_HUMAN Sulfotransferase family cytosolic 1B member 1 OS=Homo sapiens (Human) GN=SULT1B1 PE=1 SV=2	---	---	---	---	SULTs	---	---	---	---	---	1	6	32.4	34.899	296	0	65.213	985160	2306100	2117800	634550	810480	850200	1152300				520980	4	91265	57950	135650	124580	37327	3	50012	47676	50012	67783				1951900
270	O43707	O43707	O43707	Alpha-actinin-4	ACTN4	sp|O43707|ACTN4_HUMAN Alpha-actinin-4 OS=Homo sapiens (Human) GN=ACTN4 PE=1 SV=2	---	Cytoskeleton	alpha-actinin	ACTN	---	---	---	---	---	---	1	57	66.2	104.85	911	0	323.31	197410000	108960000	142180000	197340000	19859000	19627000	20829000	21533000	22822000	18859000	13990000	4	3086600	3589300	1981200	2585100	3588100	6	369880	361060	356860	378700	391500	414940	342890	176200000
271	O43708	O43708	O43708	Maleylacetoacetate isomerase	GSTZ1	sp|O43708|MAAI_HUMAN Maleylacetoacetate isomerase OS=Homo sapiens (Human) GN=GSTZ1 PE=1 SV=3	PPARA	---	---	---	---	---	---	---	---	---	1	5	30.6	24.212	216	0	60.778	9177200	4423000	5746400	4261900	610520	746780	283920	307820	797260	308790	2962600	4	564965	1019700	491440	638490	473540	6	51072.5	67835	82976	31547	34202	88584	34310	17358000
272	O43715	O43715	O43715	TP53-regulated inhibitor of apoptosis 1	TRIAP1	sp|O43715|TRIA1_HUMAN TP53-regulated inhibitor of apoptosis 1 OS=Homo sapiens (Human) GN=TRIAP1 PE=1 SV=1	---	---	---	---	---	---	---	---	---	---	1	1	17.1	8.7858	76	0	18.26					142540		131090	162430	108180		108850	0						4	27363	28507		26219	32487	21636
273	O43716	O43716	O43716	Glutamyl-tRNA(Gln) amidotransferase subunit C, mitochondrial	GATC	sp|O43716|GATC_HUMAN Glutamyl-tRNA(Gln) amidotransferase subunit C, mitochondrial OS=Homo sapiens (Human) GN=GATC PE=1 SV=1	---	---	---	---	---	---	---	---	---	---	1	3	33.1	15.086	136	0	7.0287	260830	214550	181090	165860		105090					103050	4	21980	28981	23839	20121	18429	1	11677		11677					1012600
274	O43719	O43719	O43719	HIV Tat-specific factor 1	HTATSF1	sp|O43719|HTSF1_HUMAN HIV Tat-specific factor 1 OS=Homo sapiens (Human) GN=HTATSF1 PE=1 SV=1	---	---	---	---	---	---	---	---	---	---	1	10	27.9	85.852	755	0	283.29	3535300	1685200	2641000	3374100	694490	744460		675550	107790	865470	280850	4	58971.5	69320	33043	51783	66160	5	13618	13618	14597		13246	2113.6	16970	3263200
275	O43741	O43741	O43741	5-AMP-activated protein kinase subunit beta-2	PRKAB2	sp|O43741|AAKB2_HUMAN 5-AMP-activated protein kinase subunit beta-2 OS=Homo sapiens (Human) GN=PRKAB2 PE=1 SV=1	HNF4A	---	---	---	---	---	---	AMPK	---	---	1	2	17.6	30.302	272	0	34.663	318780	270060	245200	259910							78140	4	18927.5	22770	19290	17514	18565	0
276	O43747	O43747	O43747	AP-1 complex subunit gamma-1	AP1G1	sp|O43747|AP1G1_HUMAN AP-1 complex subunit gamma-1 OS=Homo sapiens (Human) GN=AP1G1 PE=1 SV=5	---	---	---	---	---	---	---	---	---	---	1	20	37.3	91.35	822	0	113.05	9287700	7585500	11020000	6743700			338640	485020		65049	1015000	4	241045	265360	216730	314870	192680	3	9675.4			9675.4	13858		1858.6	7188600
277	O43759	O43759	O43759	Synaptogyrin-1	SYNGR1	sp|O43759|SNG1_HUMAN Synaptogyrin-1 OS=Homo sapiens (Human) GN=SYNGR1 PE=1 SV=2	---	---	---	---	---	---	---	---	---	---	1	2	10.3	25.455	233	0	12.39	798020	1289700	651630	864010							720670	4	166200	159600	257940	130330	172800	0								4366700
278	O43760	O43760	O43760	Synaptogyrin-2	SYNGR2	sp|O43760|SNG2_HUMAN Synaptogyrin-2 OS=Homo sapiens (Human) GN=SYNGR2 PE=1 SV=1	---	---	---	---	---	---	---	---	---	---	1	1	4.5	24.81	224	0.0019637	3.5706	202640	193920	217960	252810							123900	4	30043	28949	27704	31137	36115	0								880000
279	O43765	O43765	O43765	Small glutamine-rich tetratricopeptide repeat-containing protein alpha	SGTA	sp|O43765|SGTA_HUMAN Small glutamine-rich tetratricopeptide repeat-containing protein alpha OS=Homo sapiens (Human) GN=SGTA PE=1 SV=1	---	---	---	---	---	---	---	---	---	---	1	4	14.1	34.063	313	0	24.101	399980	1211300	1352100	1217300	989440	180740	585260	444040	955860	196340	627700	4	101190	33332	100940	112670	101440	6	42887.5	82453	15061	48772	37003	79655	16361	1001500
280	O43768;P56211	O43768;P56211	O43768	Alpha-endosulfine;cAMP-regulated phosphoprotein 19	ENSA;ARPP19	sp|O43768|ENSA_HUMAN Alpha-endosulfine OS=Homo sapiens (Human) GN=ENSA PE=1 SV=1;sp|P56211|ARP19_HUMAN cAMP-regulated phosphoprotein 19 OS=Homo sapiens (Human) GN=ARPP19 PE=1 SV=2	---	---	---	---	---	---	---	---	---	---	2	2	28.1	13.389	121	0	25.309	699800			1114900				1854400	530210	1784700	664890	2	100818	77755			123880	3	198300				206040	58913	198300	2235300
281	O43772	O43772	O43772	Mitochondrial carnitine/acylcarnitine carrier protein	SLC25A20	sp|O43772|MCAT_HUMAN Mitochondrial carnitine/acylcarnitine carrier protein OS=Homo sapiens (Human) GN=SLC25A20 PE=1 SV=1	PPARA	---	---	---	---	---	---	---	---	---	1	11	52.5	32.943	301	0	30.137	3109000	2998600	1990200	3921000	212170	75815	75096	97514	78378	73348	743010	4	179635	182880	176390	117070	230650	6	4535.1	12480	4459.7	4417.4	5736.1	4610.5	4314.6	3131600
282	O43776	O43776	O43776	Asparagine--tRNA ligase, cytoplasmic	NARS	sp|O43776|SYNC_HUMAN Asparagine--tRNA ligase, cytoplasmic OS=Homo sapiens (Human) GN=NARS PE=1 SV=1	---	---	---	---	---	---	---	---	---	---	1	21	54.9	62.942	548	0	233.67	18401000	17427000	12786000	13106000	1502700	1826300	1246900	145690	1402900	1372600	3146200	4	693925	836420	792130	581200	595720	6	63079	68305	83012	56675	6622.5	63768	62390	17712000
283	O43795;Q9UBC5	O43795	O43795	Unconventional myosin-Ib	MYO1B	sp|O43795|MYO1B_HUMAN Unconventional myosin-Ib OS=Homo sapiens (Human) GN=MYO1B PE=1 SV=3	---	---	---	---	---	---	---	---	---	---	2	21	27.5	131.98	1136	0	146.76	8152600	3209700	9973100	4930600	177000	410350	517660	672240	1005200	663630	479230	4	105508	131490	51770	160860	79526	6	9526.7	2854.8	6618.6	8349.4	10843	16212	10704	6102600
284	O43808	O43808	O43808	Peroxisomal membrane protein PMP34	SLC25A17	sp|O43808|PM34_HUMAN Peroxisomal membrane protein PMP34 OS=Homo sapiens (Human) GN=SLC25A17 PE=1 SV=1	---	---	---	---	---	---	---	---	---	---	1	2	10.4	34.566	307	0.0007732	4.5518	141880	117320	160040	172650							45530	4	11612.5	10914	9024.7	12311	13281	0
285	O43809	O43809	O43809	Cleavage and polyadenylation specificity factor subunit 5	NUDT21	sp|O43809|CPSF5_HUMAN Cleavage and polyadenylation specificity factor subunit 5 OS=Homo sapiens (Human) GN=NUDT21 PE=1 SV=1	---	---	---	---	---	---	---	---	---	---	1	9	55.1	26.227	227	0	66.961	10265000	5712000	8633200	13518000	332530	255430	1878400	347960	254870	293850	2963700	4	674935	733220	408000	616650	965600	6	22371	23752	18245	134170	24854	18205	20990	19633000
286	O43813	O43813	O43813	LanC-like protein 1	LANCL1	sp|O43813|LANC1_HUMAN LanC-like protein 1 OS=Homo sapiens (Human) GN=LANCL1 PE=1 SV=1	---	---	---	---	---	---	---	---	---	---	1	12	45.9	45.283	399	0	98.379	2901400	5915600	6473300	3514400						251750	1121000	4	277355	170670	347980	380780	206730	1	14809						14809	7038500
287	O43815	O43815	O43815	Striatin	STRN	sp|O43815|STRN_HUMAN Striatin OS=Homo sapiens (Human) GN=STRN PE=1 SV=4	---	---	---	---	---	---	---	---	---	---	1	8	19.9	86.131	780	0	17.033	811860	510300	742950	777100		271790	202460	177760		307160	100040	4	20000.5	21365	13429	19551	20450	4	6240.15		7152.4	5327.9	4678		8083.2	789100
288	O43819	O43819	O43819	Protein SCO2 homolog, mitochondrial	SCO2	sp|O43819|SCO2_HUMAN Protein SCO2 homolog, mitochondrial OS=Homo sapiens (Human) GN=SCO2 PE=1 SV=3	---	---	---	---	---	---	---	---	---	---	1	4	40.6	29.81	266	0	106.74	1543300	619290	645050	485050							235190	4	45155	110240	44235	46075	34646	0								2073100
289	O43822	O43822	O43822	Protein C21orf2	C21orf2	sp|O43822|CU002_HUMAN Protein C21orf2 OS=Homo sapiens (Human) GN=C21orf2 PE=1 SV=1	---	---	---	---	---	---	---	---	---	---	1	2	9.4	28.34	256	0.00077942	4.7238		67163	89111								10418	2	5209.1		4477.5	5940.7		0
290	O43823	O43823	O43823	A-kinase anchor protein 8	AKAP8	sp|O43823|AKAP8_HUMAN A-kinase anchor protein 8 OS=Homo sapiens (Human) GN=AKAP8 PE=1 SV=1	---	---	---	---	---	---	---	---	---	---	1	2	5.8	76.107	692	0	27.75	494210		83479	139060							26546	3	5150.5	18304		3091.8	5150.5	0								272180
291	O43826	O43826	O43826	Glucose-6-phosphate translocase	SLC37A4	sp|O43826|G6PT1_HUMAN Glucose-6-phosphate translocase OS=Homo sapiens (Human) GN=SLC37A4 PE=1 SV=1	HNF1A	---	---	---	---	---	---	---	---	---	1	2	10.3	46.36	429	0	98.462	1410400	2755700	2831400	1086400			96718			100360	690080	4	173585	117530	229640	235950	90529	2	8211.45			8059.8			8363.1	2185400
292	O43837	O43837	O43837	Isocitrate dehydrogenase [NAD] subunit beta, mitochondrial	IDH3B	sp|O43837|IDH3B_HUMAN Isocitrate dehydrogenase [NAD] subunit beta, mitochondrial OS=Homo sapiens (Human) GN=IDH3B PE=1 SV=2	---	---	---	---	---	---	---	---	---	---	1	8	29.6	42.183	385	0	132.43	4188000	6206600	3247600	9524600	856460	1453400	2264400	995390	2094300	1647200	1546600	4	247490	199430	295550	154650	453550	6	73825.5	40784	69212	107830	47400	99727	78439	9588200
293	O43847	O43847	O43847	Nardilysin	NRD1	sp|O43847|NRDC_HUMAN Nardilysin OS=Homo sapiens (Human) GN=NRD1 PE=1 SV=2	---	---	---	---	---	---	---	---	---	---	1	8	10.3	131.57	1150	0	18.75	1828800	176610	936330	541230							69658	4	14776	36575	3532.3	18727	10825	0								1085900
294	O43852	O43852	O43852	Calumenin	CALU	sp|O43852|CALU_HUMAN Calumenin OS=Homo sapiens (Human) GN=CALU PE=1 SV=2	---	---	---	---	---	---	---	---	---	---	1	9	43.8	37.106	315	0	93.801	5383400	8602300	7397100	1918000		1818700	2100500	2269700	988600	1072700	1971900	4	399390	336460	537640	462320	119870	5	113670		113670	131280	141850	61788	67046	6890300
295	O43854	O43854	O43854	EGF-like repeat and discoidin I-like domain-containing protein 3	EDIL3	sp|O43854|EDIL3_HUMAN EGF-like repeat and discoidin I-like domain-containing protein 3 OS=Homo sapiens (Human) GN=EDIL3 PE=1 SV=1	---	---	---	---	---	---	---	---	---	---	1	6	16	53.764	480	0	79.287	520400	450390	636380	442550		126640	122420	139360	122050		98469	4	18669	20015	17323	24476	17021	4	4789.65		4870.8	4708.5	5360	4694.3		628880
296	O43865	O43865	O43865	Putative adenosylhomocysteinase 2	AHCYL1	sp|O43865|SAHH2_HUMAN Adenosylhomocysteinase 2 OS=Homo sapiens (Human) GN=AHCYL1 PE=1 SV=2	---	---	---	---	---	---	---	---	---	---	1	14	44.7	58.951	530	0	113.79	3243600	2459400	4207800	2339600	677430	516110	1132800	1374800	937930	662500	675080	4	109677	124760	94594	161840	89985	6	31064.5	26055	19851	43568	52878	36074	25481	2345200
297	O43896;O60333	O43896	O43896	Kinesin-like protein KIF1C	KIF1C	sp|O43896|KIF1C_HUMAN Kinesin-like protein KIF1C OS=Homo sapiens (Human) GN=KIF1C PE=1 SV=3	---	---	---	---	---	---	---	---	---	---	2	5	7.1	122.95	1103	0	52.043	167440	356090	251970	242610							16690	4	4053.9	2745	5837.6	4130.6	3977.2	0
298	O43903	O43903	O43903	Growth arrest-specific protein 2	GAS2	sp|O43903|GAS2_HUMAN Growth arrest-specific protein 2 OS=Homo sapiens (Human) GN=GAS2 PE=1 SV=1	---	---	---	---	---	---	---	---	---	---	1	2	12.8	34.945	313	0	22.831	99116	172060	181240							173660	34782	3	9559.1	5506.4	9559.1	10069		1	9647.7						9647.7	135320
299	O43920	O43920	O43920	NADH dehydrogenase [ubiquinone] iron-sulfur protein 5	NDUFS5	sp|O43920|NDUS5_HUMAN NADH dehydrogenase [ubiquinone] iron-sulfur protein 5 OS=Homo sapiens (Human) GN=NDUFS5 PE=1 SV=3	---	---	---	---	---	---	---	---	---	---	1	3	29.2	12.517	106	0	14.273	1374800	1133700	1741200	746350							832680	4	209045	229140	188950	290190	124390	0								8664300
300	O43924	O43924	O43924	Retinal rod rhodopsin-sensitive cGMP 3,5-cyclic phosphodiesterase subunit delta	PDE6D	sp|O43924|PDE6D_HUMAN Retinal rod rhodopsin-sensitive cGMP 3,5-cyclic phosphodiesterase subunit delta OS=Homo sapiens (Human) GN=PDE6D PE=1 SV=1	---	Trafficking	Ras-associated	---	---	---	---	---	---	---	1	3	28.7	17.42	150	0	19.96	816430	378180	825420								505010	3	204110	204110	94544	206350		0								3640200
301	O43927	O43927	O43927	C-X-C motif chemokine 13	CXCL13	sp|O43927|CXL13_HUMAN C-X-C motif chemokine 13 OS=Homo sapiens (Human) GN=CXCL13 PE=1 SV=1	---	---	---	---	---	---	---	---	---	---	1	4	34.9	12.664	109	0	58.473	10518000	8862500	9142600	10527000	575610	919760	978210	633640	877780	896050	10983000	4	2457650	2629600	2215600	2285700	2631800	6	221725	143900	229940	244550	158410	219440	224010	68232000
302	O43929	O43929	O43929	Origin recognition complex subunit 4	ORC4	sp|O43929|ORC4_HUMAN Origin recognition complex subunit 4 OS=Homo sapiens (Human) GN=ORC4 PE=1 SV=2	---	---	---	---	---	---	---	---	---	---	1	1	2.8	50.377	436	0.0021914	3.4236		94426									3777	1	3777		3777			0
303	O43933	O43933	O43933	Peroxisome biogenesis factor 1	PEX1	sp|O43933|PEX1_HUMAN Peroxisome biogenesis factor 1 OS=Homo sapiens (Human) GN=PEX1 PE=1 SV=1	---	---	---	---	---	---	---	---	---	---	1	4	4.4	142.87	1283	0.0019622	3.5529	437280			170710							10666	2	5333.25	7671.6			2994.9	0								437280
304	O60216	O60216	O60216	Double-strand-break repair protein rad21 homolog	RAD21	sp|O60216|RAD21_HUMAN Double-strand-break repair protein rad21 homolog OS=Homo sapiens (Human) GN=RAD21 PE=1 SV=2	---	---	---	---	---	---	---	---	---	---	1	4	12.7	71.689	631	0	9.9511	275220		3318900	3679400							279750	3	127650	10585		127650	141520	0
305	O60218;C9JRZ8	O60218	O60218	Aldo-keto reductase family 1 member B10	AKR1B10	sp|O60218|AK1BA_HUMAN Aldo-keto reductase family 1 member B10 OS=Homo sapiens (Human) GN=AKR1B10 PE=1 SV=2	---	---	---	---	---	---	---	---	---	---	2	25	71.8	36.019	316	0	323.31	195860000	211000000	279660000	271730000	71817000	53881000	60011000	64897000	28064000	46640000	64178000	4	12068000	9793200	10550000	13983000	13586000	6	2847250	3590800	2694000	3000500	3244900	1403200	2332000	511740000
306	O60220	O60220	O60220	Mitochondrial import inner membrane translocase subunit Tim8 A	TIMM8A	sp|O60220|TIM8A_HUMAN Mitochondrial import inner membrane translocase subunit Tim8 A OS=Homo sapiens (Human) GN=TIMM8A PE=1 SV=1	---	---	---	---	---	---	---	---	---	---	1	6	85.6	10.998	97	0	85.158	2622900	4434000	2650200	2923800	2737100	4005000	2410900	3004200	4065200	4497000	6670100	4	557400	524590	886800	530040	584760	6	700915	547430	800990	482180	600840	813050	899410	13679000
307	O60232	O60232	O60232	Sjoegren syndrome/scleroderma autoantigen 1	SSSCA1	sp|O60232|SSA27_HUMAN Sjoegren syndrome/scleroderma autoantigen 1 OS=Homo sapiens (Human) GN=SSSCA1 PE=1 SV=1	---	---	---	---	---	---	---	---	---	---	1	2	23.6	21.474	199	0	54.457	283960		104130	268450							54711	3	22371	23663		8677.3	22371	0								494840
308	O60256	O60256	O60256	Phosphoribosyl pyrophosphate synthase-associated protein 2	PRPSAP2	sp|O60256|KPRB_HUMAN Phosphoribosyl pyrophosphate synthase-associated protein 2 OS=Homo sapiens (Human) GN=PRPSAP2 PE=1 SV=1	---	---	---	---	---	---	---	---	---	---	1	3	14.4	40.925	369	0	8.3509	292400	1472400	1047500	503650							144170	4	33719.5	12713	64018	45541	21898	0								657580
309	O60262	O60262	O60262	Guanine nucleotide-binding protein G(I)/G(S)/G(O) subunit gamma-7	GNG7	sp|O60262|GBG7_HUMAN Guanine nucleotide-binding protein G(I)/G(S)/G(O) subunit gamma-7 OS=Homo sapiens (Human) GN=GNG7 PE=1 SV=1	---	---	---	---	---	---	---	---	---	---	1	1	23.5	7.5217	68	0.0033557	3.1791	288770		269050	344950							225690	3	72191	72191		67263	86239	0								1831200
310	O60264	O60264	O60264	SWI/SNF-related matrix-associated actin-dependent regulator of chromatin subfamily A member 5	SMARCA5	sp|O60264|SMCA5_HUMAN SWI/SNF-related matrix-associated actin-dependent regulator of chromatin subfamily A member 5 OS=Homo sapiens (Human) GN=SMARCA5 PE=1 SV=1	NOTCH1	---	---	---	---	---	---	---	---	---	1	12	18.8	121.9	1052	0	45.833	1242600	335490	991330	1568300	153820	31528				159010	81493	4	20309	22594	6099.8	18024	28514	3	2796.7	2796.7	573.23				2891	1081800
311	O60271	O60271	O60271	C-Jun-amino-terminal kinase-interacting protein 4	SPAG9	sp|O60271|JIP4_HUMAN C-Jun-amino-terminal kinase-interacting protein 4 OS=Homo sapiens (Human) GN=SPAG9 PE=1 SV=4	---	---	---	---	---	---	---	---	---	---	1	7	9.2	146.2	1321	0	29.303	403760		310870	529480	156720			331170	1000200	336980	45809	3	6026.3	6026.3		4639.9	7902.7	4	4986.15	2339.1			4942.8	14929	5029.5	381580
312	O60306	O60306	O60306	Intron-binding protein aquarius	AQR	sp|O60306|AQR_HUMAN Intron-binding protein aquarius OS=Homo sapiens (Human) GN=AQR PE=1 SV=4	---	---	---	---	---	---	---	---	---	---	1	2	2.3	171.29	1485	0.0092949	2.2866				151330							2225.5	1	2225.5				2225.5	0
313	O60313	O60313	O60313	Dynamin-like 120 kDa protein, mitochondrial;Dynamin-like 120 kDa protein, form S1	OPA1	sp|O60313|OPA1_HUMAN Dynamin-like 120 kDa protein, mitochondrial OS=Homo sapiens (Human) GN=OPA1 PE=1 SV=3	HNF4A	---	---	---	---	---	---	---	---	---	1	19	31.9	111.63	960	0	200.33	8106200	2525200	5640800	4469300	770140	553000	511070	632870	832310	1036500	464400	4	93613	150110	46764	104460	82766	6	12991	14262	10241	9464.2	11720	15413	19194	7415800
314	O60331	O60331	O60331	Phosphatidylinositol 4-phosphate 5-kinase type-1 gamma	PIP5K1C	sp|O60331|PI51C_HUMAN Phosphatidylinositol 4-phosphate 5-kinase type-1 gamma OS=Homo sapiens (Human) GN=PIP5K1C PE=1 SV=2	---	---	---	---	---	---	---	---	---	---	1	1	2.4	73.259	668	0.0073143	2.4268			87952								3257.5	1	3257.5			3257.5		0
315	O60341	O60341	O60341	Lysine-specific histone demethylase 1A	KDM1A	sp|O60341|KDM1A_HUMAN Lysine-specific histone demethylase 1A OS=Homo sapiens (Human) GN=KDM1A PE=1 SV=2	SREBF1	---	---	---	---	---	---	---	---	---	1	6	12.3	92.902	852	0	23.716	695830	666200	644280	824940							76520	4	18405.5	18806	18005	17413	22296	0								791150
316	O60343	O60343	O60343	TBC1 domain family member 4	TBC1D4	sp|O60343|TBCD4_HUMAN TBC1 domain family member 4 OS=Homo sapiens (Human) GN=TBC1D4 PE=1 SV=2	---	Trafficking	Rab-associated	---	---	---	---	---	---	---	1	4	4.9	146.56	1298	0.00027345	6.0811	234270		92124	379610	70594			72270			13474	3	3718.5	3718.5		1462.3	6025.6	2	1133.8	1120.5			1147.1			234270
317	O60391	O60391	O60391	Glutamate receptor ionotropic, NMDA 3B	GRIN3B	sp|O60391|NMD3B_HUMAN Glutamate receptor ionotropic, NMDA 3B OS=Homo sapiens (Human) GN=GRIN3B PE=2 SV=2	---	---	---	---	---	---	---	---	---	---	1	1	0.7	112.99	1043	0.0099323	2.2396	2514800	3117400	1208300	440650	375750	297980	312200	365320	314870	285970	196450	4	39607	53506	66328	25708	9375.5	6	6671	7994.8	6339.9	6642.6	7772.8	6699.4	6084.5	17996000
318	O60423	O60423	O60423	Phospholipid-transporting ATPase IK	ATP8B3	sp|O60423|AT8B3_HUMAN Phospholipid-transporting ATPase IK OS=Homo sapiens (Human) GN=ATP8B3 PE=2 SV=4	---	---	---	---	---	---	---	---	---	---	1	1	0.5	146.75	1300	0.0056088	2.7224	1343400			852900							37867	2	18933.5	23162			14705	0								1343400
319	O60437	O60437	O60437	Periplakin	PPL	sp|O60437|PEPL_HUMAN Periplakin OS=Homo sapiens (Human) GN=PPL PE=1 SV=4	GATA4	---	---	---	---	---	---	---	---	---	1	16	15.8	204.74	1756	0	160.71	2141700	118050	113960	733180	1157000	1593400	1255800	1784800	1818100	1772700	110520	4	3766.5	18953	1044.7	1008.5	6488.3	6	14894	10239	14101	11114	15795	16090	15687	6128300
320	O60443	O60443	O60443	Non-syndromic hearing impairment protein 5	DFNA5	sp|O60443|DFNA5_HUMAN Non-syndromic hearing impairment protein 5 OS=Homo sapiens (Human) GN=DFNA5 PE=1 SV=2	---	---	---	---	---	---	---	---	---	---	1	14	48.6	54.554	496	0	100.61	1124100	4947200	4603600	2455700	241210	316000	208210	377780	182870	188960	610230	4	147070	46836	206130	191820	102320	6	9362.7	10050	13167	8675.4	15741	7619.7	7873.3	2449700
321	O60488	O60488	O60488	Long-chain-fatty-acid--CoA ligase 4	ACSL4	sp|O60488|ACSL4_HUMAN Long-chain-fatty-acid--CoA ligase 4 OS=Homo sapiens (Human) GN=ACSL4 PE=1 SV=2	---	---	---	---	---	---	---	---	---	---	1	17	35.9	79.187	711	0	245.43	16483000	12293000	18809000	17131000	591720	445740	1678400	1237200	642150	1013000	2009300	4	480205	470950	351240	537400	489460	6	23645	16906	12735	47955	35349	18347	28943	21544000
322	O60493	O60493	O60493	Sorting nexin-3	SNX3	sp|O60493|SNX3_HUMAN Sorting nexin-3 OS=Homo sapiens (Human) GN=SNX3 PE=1 SV=3	---	---	---	---	---	---	---	---	---	---	1	7	59.3	18.762	162	0	32.35	9119700	6463200	6809400	8503200		428040		543500		547130	3241400	4	765630	911970	646320	680940	850320	3	54350		42804		54350		54713	36089000
323	O60499	O60499	O60499	Syntaxin-10	STX10	sp|O60499|STX10_HUMAN Syntaxin-10 OS=Homo sapiens (Human) GN=STX10 PE=1 SV=1	---	---	---	---	---	---	---	---	---	---	1	3	19.3	28.114	249	0	9.3964	186440			94682							25557	2	12778.8	16950			8607.5	0								403490
324	O60502	O60502	O60502	Protein O-GlcNAcase	MGEA5	sp|O60502|OGA_HUMAN Protein O-GlcNAcase OS=Homo sapiens (Human) GN=MGEA5 PE=1 SV=2	HNF4A	---	---	---	---	---	---	---	---	---	1	14	26.4	102.91	916	0	55.932	5189300	1657200	2055400	3477900	120670	116310	128360	265480	351410	126370	293230	4	60144.5	112810	36026	44682	75607	6	2768.75	2623.3	2528.6	2790.4	5771.2	7639.3	2747.1	3576000
325	O60503	O60503	O60503	Adenylate cyclase type 9	ADCY9	sp|O60503|ADCY9_HUMAN Adenylate cyclase type 9 OS=Homo sapiens (Human) GN=ADCY9 PE=1 SV=4	---	---	---	---	---	---	---	---	---	---	1	2	2.4	150.7	1353	0.0049319	2.8191		38338		434940							7512.4	2	3756.18		608.55		6903.8	0
326	O60504	O60504	O60504	Vinexin	SORBS3	sp|O60504|VINEX_HUMAN Vinexin OS=Homo sapiens (Human) GN=SORBS3 PE=1 SV=2	---	---	---	---	---	---	---	---	---	---	1	4	7.6	75.34	671	0	7.2248		313140	331610	193480					163660		26366	3	8240.5		8240.5	8726.7	5091.6	1	4306.8					4306.8
327	O60506	O60506	O60506	Heterogeneous nuclear ribonucleoprotein Q	SYNCRIP	sp|O60506|HNRPQ_HUMAN Heterogeneous nuclear ribonucleoprotein Q OS=Homo sapiens (Human) GN=SYNCRIP PE=1 SV=2	---	---	---	---	---	---	---	---	---	---	1	14	26.8	69.602	623	0	122.47	6322100	5040300	9490400	9601000	2421900	2497200	2428200	2516000	2257800	3826600	1450000	4	247070	197570	157510	296570	300030	6	76959.5	75686	78037	75882	78624	70557	119580	8386200
328	O60518	O60518	O60518	Ran-binding protein 6	RANBP6	sp|O60518|RNBP6_HUMAN Ran-binding protein 6 OS=Homo sapiens (Human) GN=RANBP6 PE=1 SV=2	---	---	---	---	---	---	---	---	---	---	1	6	8.7	124.71	1105	0	70.868	1474800	435030	437460	1596500							71705	4	17383.9	26814	7909.6	7953.9	29027	0								1217800
329	O60524	O60524	O60524	Nuclear export mediator factor NEMF	NEMF	sp|O60524|NEMF_HUMAN Nuclear export mediator factor NEMF OS=Homo sapiens (Human) GN=NEMF PE=1 SV=4	---	---	---	---	---	---	---	---	---	---	1	2	2.9	122.95	1076	0	10.9	144830		103980	119270							7361.6	3	2385.3	2896.7		2079.6	2385.3	0								144830
330	O60547	O60547	O60547	GDP-mannose 4,6 dehydratase	GMDS	sp|O60547|GMDS_HUMAN GDP-mannose 4,6 dehydratase OS=Homo sapiens (Human) GN=GMDS PE=1 SV=1	---	---	---	---	---	---	---	---	---	---	1	5	22.6	41.949	372	0	35.533	746530	2048200	2164200	313870	337650	234180	313230	97350	226870	84558	252560	4	53745.5	28713	78778	83238	12072	6	8866.3	12986	9006.9	12047	3744.2	8725.7	3252.2	1505000
331	O60551	O60551	O60551	Glycylpeptide N-tetradecanoyltransferase 2	NMT2	sp|O60551|NMT2_HUMAN Glycylpeptide N-tetradecanoyltransferase 2 OS=Homo sapiens (Human) GN=NMT2 PE=1 SV=1	---	---	---	---	---	---	---	---	---	---	1	2	5.4	56.98	498	0.00077061	4.4629					85067	108000	104030		147560	122430	23629	0						5	4500.1	3544.5	4500.1	4334.6		6148.3	5101.4
332	O60563	O60563	O60563	Cyclin-T1	CCNT1	sp|O60563|CCNT1_HUMAN Cyclin-T1 OS=Homo sapiens (Human) GN=CCNT1 PE=1 SV=1	GATA4	---	---	---	---	---	---	---	---	---	1	1	2.1	80.684	726	0.0069252	2.5322		90650		52625							5510.6	2	2755.25		3486.5		2024	0
333	O60568	O60568	O60568	Procollagen-lysine,2-oxoglutarate 5-dioxygenase 3	PLOD3	sp|O60568|PLOD3_HUMAN Procollagen-lysine,2-oxoglutarate 5-dioxygenase 3 OS=Homo sapiens (Human) GN=PLOD3 PE=1 SV=1	---	ECM	Collagen-associated	---	---	---	---	---	---	---	1	17	34.4	84.784	738	0	100.18	4905400	2531000	3073700	3265700	1134400	812020	1267300	980450	1211400	841760	465660	4	73713.5	114080	58861	71481	75946	6	24591.5	26382	18884	29472	22801	28173	19576	4217100
334	O60573	O60573	O60573	Eukaryotic translation initiation factor 4E type 2	EIF4E2	sp|O60573|IF4E2_HUMAN Eukaryotic translation initiation factor 4E type 2 OS=Homo sapiens (Human) GN=EIF4E2 PE=1 SV=1	---	---	---	---	---	---	---	---	---	---	1	3	19.6	28.362	245	0	38.377	1014600	1497700	1972700	1034000							424540	4	97374.5	78045	115210	151750	79539	0								2446600
335	O60603	O60603	O60603	Toll-like receptor 2	TLR2	sp|O60603|TLR2_HUMAN Toll-like receptor 2 OS=Homo sapiens (Human) GN=TLR2 PE=1 SV=1	---	Membrane receptors	Immune- and cytokine receptor	---	---	---	---	---	---	---	1	2	5.7	89.837	784	0.0088798	2.3565			107090	3746400							85634	2	42816.8			2379.7	83254	0
336	O60610	O60610	O60610	Protein diaphanous homolog 1	DIAPH1	sp|O60610|DIAP1_HUMAN Protein diaphanous homolog 1 OS=Homo sapiens (Human) GN=DIAPH1 PE=1 SV=2	---	---	---	---	---	---	---	---	---	---	1	22	26.4	141.35	1272	0	163.2	2470200	1645900	3807800	3338100	735320	515440	819700	979290	1470700	332090	268570	4	48402	41169	27431	63464	55635	6	12958.5	12255	8590.7	13662	16322	24511	5534.8	3018500
337	O60613	O60613	O60613	15 kDa selenoprotein	SEP15	sp|O60613|SEP15_HUMAN 15 kDa selenoprotein OS=Homo sapiens (Human) GN=SEP15 PE=1 SV=3	---	---	---	---	---	---	---	---	---	---	1	5	43.2	17.79	162	0	29.834	1519900	341800	2255300	1487400							622720	4	167075	168880	37978	250590	165270	0								9661400
338	O60645	O60645	O60645	Exocyst complex component 3	EXOC3	sp|O60645|EXOC3_HUMAN Exocyst complex component 3 OS=Homo sapiens (Human) GN=EXOC3 PE=1 SV=2	---	---	---	---	---	---	---	---	---	---	1	4	7.4	86.844	756	0	10.197	462370	150880	596960	325000							42645	4	10935.9	12844	4191.1	16582	9027.8	0								485510
339	O60656;Q9HAW9	O60656;Q9HAW9	O60656	UDP-glucuronosyltransferase 1-9;UDP-glucuronosyltransferase 1-8	UGT1A9;UGT1A8	sp|O60656|UD19_HUMAN UDP-glucuronosyltransferase 1-9 OS=Homo sapiens (Human) GN=UGT1A9 PE=1 SV=1;sp|Q9HAW9|UD18_HUMAN UDP-glucuronosyltransferase 1-8 OS=Homo sapiens (Human) GN=UGT1A8 PE=1 SV=1	---	---	---	---	UGTs	UGTs	---	---	---	---	2	11	34.9	59.94	530	0	323.31	50984000	52807000	56991000	46888000	5363100	3353500	6147400	8786500	4302900	6426500	11002000	4	2358900	2317500	2400300	2590500	2131300	6	261605	243780	152430	279430	399390	195590	292110	80104000
340	O60664	O60664	O60664	Perilipin-3	PLIN3	sp|O60664|PLIN3_HUMAN Perilipin-3 OS=Homo sapiens (Human) GN=PLIN3 PE=1 SV=3	---	---	---	---	---	---	---	---	---	---	1	19	72.6	47.074	434	0	323.31	11764000	13695000	17467000	8504800	2841300	5192400	4736300	4870700	3852700	4706900	2985800	4	489595	452450	526740	671800	327110	6	181605	109280	199710	182170	187340	148180	181040	18125000
341	O60669	O60669	O60669	Monocarboxylate transporter 2	SLC16A7	sp|O60669|MOT2_HUMAN Monocarboxylate transporter 2 OS=Homo sapiens (Human) GN=SLC16A7 PE=1 SV=2	---	Membrane Transporters (SLC)	Major facilitator Superfamily (MFS-MCT)	---	---	---	---	---	---	---	1	1	3.1	52.2	478	0.00027285	6.0336					83486	94030	161010	103520	122950	106200	47943	0						6	7490.3	5963.3	6716.5	11500	7394.6	8782.4	7586
342	O60684;O15131	O60684	O60684	Importin subunit alpha-7	KPNA6	sp|O60684|IMA7_HUMAN Importin subunit alpha-7 OS=Homo sapiens (Human) GN=KPNA6 PE=1 SV=1	---	---	---	---	---	---	---	---	---	---	2	13	51.7	60.029	536	0	98.63	3158800	4686500	3313900	3952400	349620	121230	329470	366880	269520		719490	4	157960	137340	203760	144080	171840	5	14325	15201	5270.8	14325	15951	11718		3321600
343	O60701	O60701	O60701	UDP-glucose 6-dehydrogenase	UGDH	sp|O60701|UGDH_HUMAN UDP-glucose 6-dehydrogenase OS=Homo sapiens (Human) GN=UGDH PE=1 SV=1	---	---	---	---	---	---	---	---	---	---	1	40	86.2	55.023	494	0	323.31	145590000	191730000	233450000	183760000	45327000	67442000	83130000	82257000	75216000	90612000	42804000	4	6705250	5199600	6847500	8337700	6563000	6	2812050	1618800	2408600	2968900	2937800	2686300	3236200	309750000
344	O60716	O60716	O60716	Catenin delta-1	CTNND1	sp|O60716|CTND1_HUMAN Catenin delta-1 OS=Homo sapiens (Human) GN=CTNND1 PE=1 SV=1	---	#N/A	#N/A	CTNND1	---	---	---	---	---	---	1	26	36.5	108.17	968	0	323.31	21596000	13527000	20145000	17055000	2462800	3257500	4772200	2301800	4711000	4091800	1956700	4	387500	449910	281820	419680	355320	6	76555	51309	67865	99421	47955	98146	85245	17256000
345	O60732	O60732	O60732	Melanoma-associated antigen C1	MAGEC1	sp|O60732|MAGC1_HUMAN Melanoma-associated antigen C1 OS=Homo sapiens (Human) GN=MAGEC1 PE=1 SV=3	---	---	---	---	---	---	---	---	---	---	1	2	2.9	123.64	1142	0.0026551	3.2843						215750				142810	23904	0						2	11951.8		14383				9520.6
346	O60739	O60739	O60739	Eukaryotic translation initiation factor 1b	EIF1B	sp|O60739|EIF1B_HUMAN Eukaryotic translation initiation factor 1b OS=Homo sapiens (Human) GN=EIF1B PE=1 SV=2	---	---	---	---	---	---	---	---	---	---	1	3	40.7	12.823	113	0	40.961	525620	486290	308820	1059800	380600						552230	4	101190	105120	97259	61764	211970	1	76120	76120						3789300
347	O60749	O60749	O60749	Sorting nexin-2	SNX2	sp|O60749|SNX2_HUMAN Sorting nexin-2 OS=Homo sapiens (Human) GN=SNX2 PE=1 SV=2	---	---	---	---	---	---	---	---	---	---	1	10	26.6	58.47	519	0	69.996	3025500	3950600	1913800	4748600	574870	392590	595810	857230		446640	611320	4	129185	112050	146320	70882	175870	5	21291	21291	14540	22067	31749		16542	3597500
348	O60762	O60762	O60762	Dolichol-phosphate mannosyltransferase subunit 1	DPM1	sp|O60762|DPM1_HUMAN Dolichol-phosphate mannosyltransferase subunit 1 OS=Homo sapiens (Human) GN=DPM1 PE=1 SV=1	---	---	---	---	---	---	---	---	---	---	1	11	53.5	29.634	260	0	153.71	8530400	5020600	3089100	6247700							1430500	4	352135	533150	313790	193070	390480	0								12536000
349	O60763	O60763	O60763	General vesicular transport factor p115	USO1	sp|O60763|USO1_HUMAN General vesicular transport factor p115 OS=Homo sapiens (Human) GN=USO1 PE=1 SV=2	---	---	---	---	---	---	---	---	---	---	1	27	51.5	107.89	962	0	323.31	19525000	19234000	19978000	26637000	4623800	4482400	4175600	5056600	5360700	4701900	2645900	4	459345	454080	447290	464610	619460	6	108440	107530	104240	97107	117590	124670	109350	25504000
350	O60783	O60783	O60783	28S ribosomal protein S14, mitochondrial	MRPS14	sp|O60783|RT14_HUMAN 28S ribosomal protein S14, mitochondrial OS=Homo sapiens (Human) GN=MRPS14 PE=1 SV=1	---	---	---	---	---	---	---	---	---	---	1	2	24.2	15.139	128	0	9.3976	1011500	418790	426800	1113100				1622200			765400	4	119856	168580	69798	71133	185510	1	270370				270370			5480700
351	O60784	O60784	O60784	Target of Myb protein 1	TOM1	sp|O60784|TOM1_HUMAN Target of Myb protein 1 OS=Homo sapiens (Human) GN=TOM1 PE=1 SV=2	---	---	---	---	---	---	---	---	---	---	1	14	57.3	53.818	492	0	229.04	10045000	3729100	4095600	6496300	2050900	2665000	1385600	1949200	1567600	2419400	2022400	4	294220	558040	207170	227530	360910	6	111115	113940	148050	76979	108290	87089	134410	8412100
352	Q99880;Q99879;Q99877;Q93079;Q5QNW6;P62807;P58876;P57053;O60814	Q99880;Q99879;Q99877;Q93079;Q5QNW6;P62807;P58876;P57053;O60814	Q99880	Histone H2B type 1-L;Histone H2B type 1-M;Histone H2B type 1-N;Histone H2B type 1-H;Histone H2B type 2-F;Histone H2B type 1-C/E/F/G/I;Histone H2B type 1-D;Histone H2B type F-S;Histone H2B type 1-K	HIST1H2BL;HIST1H2BM;HIST1H2BN;HIST1H2BH;HIST2H2BF;HIST1H2BC;HIST1H2BD;H2BFS;HIST1H2BK	sp|Q99880|H2B1L_HUMAN Histone H2B type 1-L OS=Homo sapiens (Human) GN=HIST1H2BL PE=1 SV=3;sp|Q99879|H2B1M_HUMAN Histone H2B type 1-M OS=Homo sapiens (Human) GN=HIST1H2BM PE=1 SV=3;sp|Q99877|H2B1N_HUMAN Histone H2B type 1-N OS=Homo sapiens (Human) GN=HIS	---	---	---	---	---	---	---	---	---	---	9	6	41.3	13.952	126	0	251.92	78080000	59259000	61134000	110260000	8903600		6981900	12489000	5666100	2186000	49280000	4	9943700	11154000	8465500	8733400	15751000	5	997410	1271900		997410	1784100	809440	312280	271170000
353	O60826	O60826	O60826	Coiled-coil domain-containing protein 22	CCDC22	sp|O60826|CCD22_HUMAN Coiled-coil domain-containing protein 22 OS=Homo sapiens (Human) GN=CCDC22 PE=1 SV=1	---	---	---	---	---	---	---	---	---	---	1	5	14.4	70.755	627	0	24.326	248530	820460	270450	534260	96141	96883	105270	98746	117510	103570	69217	4	11176.8	6903.5	22791	7512.6	14841	6	2809.85	2670.6	2691.2	2924.1	2742.9	3264.2	2876.8	473900
354	O60831	O60831	O60831	PRA1 family protein 2	PRAF2	sp|O60831|PRAF2_HUMAN PRA1 family protein 2 OS=Homo sapiens (Human) GN=PRAF2 PE=1 SV=1	---	---	---	---	---	---	---	---	---	---	1	3	22.5	19.258	178	0	7.4712	203070	402520	200080	1583400							398180	4	50466	33845	67087	33347	263900	0								1733600
355	O60841	O60841	O60841	Eukaryotic translation initiation factor 5B	EIF5B	sp|O60841|IF2P_HUMAN Eukaryotic translation initiation factor 5B OS=Homo sapiens (Human) GN=EIF5B PE=1 SV=4	---	---	---	---	---	---	---	---	---	---	1	8	9.5	138.83	1220	0	57.091	2764900	3614800	4154400	4686300			235240	212820	137170	117930	318470	4	77692.5	55299	72296	83089	93726	4	3499.9			4704.8	4256.3	2743.5	2358.6	5632700
356	O60869	O60869	O60869	Endothelial differentiation-related factor 1	EDF1	sp|O60869|EDF1_HUMAN Endothelial differentiation-related factor 1 OS=Homo sapiens (Human) GN=EDF1 PE=1 SV=1	---	---	---	---	---	---	---	---	---	---	1	4	25.7	16.368	148	0	51.813	2514800	4935200	4985200	2084700	845900	876180	818400	233030			1921500	4	413890	279420	548360	553910	231630	4	92461	93989	97353	90933	25892			16409000
357	O60879	O60879	O60879	Protein diaphanous homolog 2	DIAPH2	sp|O60879|DIAP2_HUMAN Protein diaphanous homolog 2 OS=Homo sapiens (Human) GN=DIAPH2 PE=1 SV=1	---	---	---	---	---	---	---	---	---	---	1	17	24.3	125.57	1101	0	99.449	5282400	2038300	2797000	3936200	521830	754400	755200		522690	567770	318070	4	62344	97823	37747	51796	72892	5	10514	9663.5	13970	13985		9679.5	10514	4274300
358	O60884	O60884	O60884	DnaJ homolog subfamily A member 2	DNAJA2	sp|O60884|DNJA2_HUMAN DnaJ homolog subfamily A member 2 OS=Homo sapiens (Human) GN=DNAJA2 PE=1 SV=1	HNF4A	---	---	---	---	DNAJ	---	---	---	---	1	5	21.1	45.745	412	0	14.949	2111300	2442100	3492800	1221100	831520	700200	751800	552370	526550	768970	609030	4	103484	95967	111000	158760	55504	6	33000	37796	31827	34173	25108	23934	34953	4493500
359	O60888	O60888	O60888	Protein CutA	CUTA	sp|O60888|CUTA_HUMAN Protein CutA OS=Homo sapiens (Human) GN=CUTA PE=1 SV=2	---	---	---	---	---	---	---	---	---	---	1	5	48.6	19.116	179	0	64.215	9720800	4416700	4246600	10177000	2195900	5465300	3294500	3767500	3142500	4569200	8499300	4	1178110	1620100	736120	707770	1696100	6	588500	365980	910880	549080	627920	523740	761530	30725000
360	O60925	O60925	O60925	Prefoldin subunit 1	PFDN1	sp|O60925|PFD1_HUMAN Prefoldin subunit 1 OS=Homo sapiens (Human) GN=PFDN1 PE=1 SV=2	---	---	---	---	---	---	---	---	---	---	1	2	28.7	14.21	122	0	8.1906	271640	190010	667390		122140	114240					170680	3	33955	33955	23751	83424		2	14774.5	15268	14281					2767200
361	O60936	O60936	O60936	Nucleolar protein 3	NOL3	sp|O60936|NOL3_HUMAN Nucleolar protein 3 OS=Homo sapiens (Human) GN=NOL3 PE=1 SV=2	FOXO3	---	---	---	---	---	---	---	---	---	1	5	56.2	22.629	208	0	75.164	890970	557170	825630	561650	932470	1089200	1013200	285390	1003800	801910	995180	4	86703.5	111370	69646	103200	70207	6	121020	116560	136150	126650	35674	125480	100240	1248500
362	O75027	O75027	O75027	ATP-binding cassette sub-family B member 7, mitochondrial	ABCB7	sp|O75027|ABCB7_HUMAN ATP-binding cassette sub-family B member 7, mitochondrial OS=Homo sapiens (Human) GN=ABCB7 PE=1 SV=2	---	---	---	---	---	---	---	---	---	---	1	4	13	82.64	752	0	7.4911	998590	132580				205350	238300	357890		248260	64146	2	16634.8	29370	3899.5			4	7155.35		6039.8	7008.9	10526		7301.8	874880
363	O75083	O75083	O75083	WD repeat-containing protein 1	WDR1	sp|O75083|WDR1_HUMAN WD repeat-containing protein 1 OS=Homo sapiens (Human) GN=WDR1 PE=1 SV=4	---	---	---	---	---	---	---	---	---	---	1	23	59.7	66.193	606	0	323.31	19121000	24397000	26519000	14937000	10819000	7364500	6331500	6425700	6369300	8449500	4357800	4	725300	637380	813220	883970	497900	6	229835	360640	245480	211050	214190	212310	281650	18896000
364	O75116	O75116	O75116	Rho-associated protein kinase 2	ROCK2	sp|O75116|ROCK2_HUMAN Rho-associated protein kinase 2 OS=Homo sapiens (Human) GN=ROCK2 PE=1 SV=4	---	Trafficking	protein kinase (Rho-associated)	---	---	---	---	---	---	---	1	6	7.9	160.9	1388	0	109.81	1580600	220520	1467200	1482500	94453	456190	787230	645790	577580	749810	100770	4	18435.5	19757	2756.5	18340	18531	6	7646.05	1180.7	5702.4	9840.4	8072.4	7219.7	9372.6	1355400
365	O75122	O75122	O75122	CLIP-associating protein 2	CLASP2	sp|O75122|CLAP2_HUMAN CLIP-associating protein 2 OS=Homo sapiens (Human) GN=CLASP2 PE=1 SV=2	---	---	---	---	---	---	---	---	---	---	1	7	10.4	141.13	1294	0	23.779	986900	129620	349550	823270							30123	4	7715.7	12985	1705.5	4599.4	10832	0								858100
366	O75131;Q96FN4;Q8IYJ1;Q96A23;Q86YQ8;Q9HCH3	O75131	O75131	Copine-3	CPNE3	sp|O75131|CPNE3_HUMAN Copine-3 OS=Homo sapiens (Human) GN=CPNE3 PE=1 SV=1	---	---	---	---	---	---	---	---	---	---	6	16	48.6	60.13	537	0	133.56	12523000	13046000	14007000	8289800	3598400	3400800	3096400	3021900	3074700	3104400	2798400	4	532695	521800	543590	583610	345410	6	129185	149930	141700	129020	125910	128110	129350	19255000
367	O75146	O75146	O75146	Huntingtin-interacting protein 1-related protein	HIP1R	sp|O75146|HIP1R_HUMAN Huntingtin-interacting protein 1-related protein OS=Homo sapiens (Human) GN=HIP1R PE=1 SV=2	---	---	---	---	---	---	---	---	---	---	1	6	10.4	119.39	1068	0	30.407	2007800	299520	277720	724950	96405	96903	133150	1740800	119410	313230	92220	4	8130.65	31870	4754.3	4408.3	11507	6	2004.45	1530.2	1538.1	2113.5	27632	1895.4	4971.9	1872300
368	O75150	O75150	O75150	E3 ubiquitin-protein ligase BRE1B	RNF40	sp|O75150|BRE1B_HUMAN E3 ubiquitin-protein ligase BRE1B OS=Homo sapiens (Human) GN=RNF40 PE=1 SV=4	---	---	---	---	---	---	---	---	---	---	1	5	7.3	113.65	1001	0	14.127	758170	390380	571310	830210							51002	4	13294.5	15163	7807.5	11426	16604	0								883930
369	O75152	O75152	O75152	Zinc finger CCCH domain-containing protein 11A	ZC3H11A	sp|O75152|ZC11A_HUMAN Zinc finger CCCH domain-containing protein 11A OS=Homo sapiens (Human) GN=ZC3H11A PE=1 SV=3	---	---	---	---	---	---	---	---	---	---	1	1	1.9	89.13	810	0.0026474	3.2543				158780							3780.6	1	3780.6				3780.6	0
370	O75153;Q9Y5I4	O75153	O75153	Clustered mitochondria protein homolog	CLUH	sp|O75153|CLU_HUMAN Clustered mitochondria protein homolog OS=Homo sapiens (Human) GN=CLUH PE=1 SV=2	---	---	---	---	---	---	---	---	---	---	2	33	44.2	146.67	1309	0	257.98	13498000	3031400	4373900	8722800		143110	547100		174490		448400	4	96300.5	198510	44579	64321	128280	3	2566		2104.6	8045.6		2566		10569000
371	O75157	O75157	O75157	TSC22 domain family protein 2	TSC22D2	sp|O75157|T22D2_HUMAN TSC22 domain family protein 2 OS=Homo sapiens (Human) GN=TSC22D2 PE=1 SV=3	---	---	---	---	---	---	---	---	---	---	1	2	4.1	79.227	780	0.00076161	4.2726						82802	92588	228030	81857	84696	47498	0						5	7058		6900.2	7715.6	19002	6821.4	7058
372	O75165	O75165	O75165	DnaJ homolog subfamily C member 13	DNAJC13	sp|O75165|DJC13_HUMAN DnaJ homolog subfamily C member 13 OS=Homo sapiens (Human) GN=DNAJC13 PE=1 SV=5	---	---	---	---	---	DNAJ	---	---	---	---	1	7	5.6	254.41	2243	0	35.668	786220	414140	1225800	723050		112780		125220			30243	4	6737.85	7019.9	3697.7	10945	6455.8	2	1062.5		1007		1118			831910
373	O75170	O75170	O75170	Serine/threonine-protein phosphatase 6 regulatory subunit 2	PPP6R2	sp|O75170|PP6R2_HUMAN Serine/threonine-protein phosphatase 6 regulatory subunit 2 OS=Homo sapiens (Human) GN=PPP6R2 PE=1 SV=2	---	---	---	---	---	---	---	---	---	---	1	10	19.2	104.94	966	0	49.626	1045900	1095000	1309500	1149200			66177		93554		97128	4	22899.5	21345	22346	26725	23453	2	1629.95			1350.6		1909.3		1368900
374	O75175	O75175	O75175	CCR4-NOT transcription complex subunit 3	CNOT3	sp|O75175|CNOT3_HUMAN CCR4-NOT transcription complex subunit 3 OS=Homo sapiens (Human) GN=CNOT3 PE=1 SV=1	---	---	---	---	---	---	---	---	---	---	1	2	4.9	81.871	753	0	7.4982	550130			180590							38459	2	19229.3	28954			9504.7	0								344850
375	Q8WWF6;O75190	Q8WWF6;O75190	Q8WWF6	DnaJ homolog subfamily B member 3;DnaJ homolog subfamily B member 6	DNAJB3;DNAJB6	sp|Q8WWF6|DNJB3_HUMAN DnaJ homolog subfamily B member 3 OS=Homo sapiens (Human) GN=DNAJB3 PE=1 SV=1;sp|O75190|DNJB6_HUMAN DnaJ homolog subfamily B member 6 OS=Homo sapiens (Human) GN=DNAJB6 PE=1 SV=2	---	---	---	---	---	DNAJ	---	---	---	---	2	1	9	16.558	145	0.0056049	2.7139	307620										43946	1	43946	43946				0								665720
376	O75191	O75191	O75191	Xylulose kinase	XYLB	sp|O75191|XYLB_HUMAN Xylulose kinase OS=Homo sapiens (Human) GN=XYLB PE=1 SV=3	---	---	---	---	---	---	---	---	---	---	1	11	38.2	58.382	536	0	105.76	609970	2419600	1279800	2373700	796500	688210	561630	251300	472530	837680	411640	4	73070	24399	96786	51192	94948	6	24996.5	31860	27528	22465	10052	18901	33507	597180
377	O75192	O75192	O75192	Peroxisomal membrane protein 11A	PEX11A	sp|O75192|PX11A_HUMAN Peroxisomal membrane protein 11A OS=Homo sapiens (Human) GN=PEX11A PE=1 SV=1	---	---	---	---	---	---	---	---	---	---	1	5	38.1	28.353	247	0	23.057	2982300	3821300	1972800	2651000							879030	4	216670	229410	293950	151750	203930	0								7865700
378	O75208	O75208	O75208	Ubiquinone biosynthesis protein COQ9, mitochondrial	COQ9	sp|O75208|COQ9_HUMAN Ubiquinone biosynthesis protein COQ9, mitochondrial OS=Homo sapiens (Human) GN=COQ9 PE=1 SV=1	---	---	---	---	---	---	---	---	---	---	1	6	38.7	35.509	318	0	323.31	8380800	11783000	12479000	7858800	696620	522380	621670	857730	544860	573080	3409000	4	775530	644680	906380	959890	604520	6	45952	53586	40183	47821	65979	41912	44083	11684000
379	O75223	O75223	O75223	Gamma-glutamylcyclotransferase	GGCT	sp|O75223|GGCT_HUMAN Gamma-glutamylcyclotransferase OS=Homo sapiens (Human) GN=GGCT PE=1 SV=1	---	---	---	---	---	---	---	---	---	---	1	10	66.5	21.007	188	0	177.09	9216200	11139000	8736000	11837000	1386400	2078100	1572100	2283200	1912900	1895600	4004400	4	782885	708940	856830	672000	910560	6	146485	106650	159850	120930	175630	147150	145820	29595000
380	O75251	O75251	O75251	NADH dehydrogenase [ubiquinone] iron-sulfur protein 7, mitochondrial	NDUFS7	sp|O75251|NDUS7_HUMAN NADH dehydrogenase [ubiquinone] iron-sulfur protein 7, mitochondrial OS=Homo sapiens (Human) GN=NDUFS7 PE=1 SV=3	---	---	---	---	---	---	---	---	---	---	1	5	32.9	23.563	213	0	11.643	1319000	1030200	2329600	3337700							801650	4	182430	131900	103020	232960	333770	0								7008100
381	O75293	O75293	O75293	Growth arrest and DNA damage-inducible protein GADD45 beta	GADD45B	sp|O75293|GA45B_HUMAN Growth arrest and DNA damage-inducible protein GADD45 beta OS=Homo sapiens (Human) GN=GADD45B PE=1 SV=1	PPARA	---	---	---	---	---	---	---	---	---	1	1	6.2	17.818	160	0.0097131	2.2493	1656500	1918900	1823300	1835000							1033400	4	261305	236640	274120	260470	262140	0								2261500
382	O75306	O75306	O75306	NADH dehydrogenase [ubiquinone] iron-sulfur protein 2, mitochondrial	NDUFS2	sp|O75306|NDUS2_HUMAN NADH dehydrogenase [ubiquinone] iron-sulfur protein 2, mitochondrial OS=Homo sapiens (Human) GN=NDUFS2 PE=1 SV=2	---	---	---	---	---	---	---	---	---	---	1	8	27.9	52.545	463	0	16.511	860190	2481700	8339500	363460				118340			486520	4	66837	34407	99267	333580	14539	1	4733.7				4733.7			2728600
383	O75312	O75312	O75312	Zinc finger protein ZPR1	ZPR1	sp|O75312|ZPR1_HUMAN Zinc finger protein ZPR1 OS=Homo sapiens (Human) GN=ZPR1 PE=1 SV=1	---	---	---	---	---	---	---	---	---	---	1	6	20.9	50.925	459	0	29.168	119100	147130	81063	368830	160830	156810		340430			52854	4	5119.7	4580.6	5658.8	3117.8	14186	3	6186	6186	6031.3		13093			233850
384	O75323	O75323	O75323	Protein NipSnap homolog 2	GBAS	sp|O75323|NIPS2_HUMAN Protein NipSnap homolog 2 OS=Homo sapiens (Human) GN=GBAS PE=1 SV=1	FOXO3	---	---	---	---	---	---	---	---	---	1	5	26.6	33.742	286	0	10.883	1896200	3248800		2258100	164620			121970	136480		489140	3	141130	118510	203050		141130	3	8530.1	10289			7623.2	8530.1
385	O75340	O75340	O75340	Programmed cell death protein 6	PDCD6	sp|O75340|PDCD6_HUMAN Programmed cell death protein 6 OS=Homo sapiens (Human) GN=PDCD6 PE=1 SV=1	---	---	---	---	---	---	---	---	---	---	1	9	67	21.868	191	0	103.47	7058000	7685400	1576300	9822800	2739400	1858700	3013900	3818900	2416400	2738400	3884400	4	670155	641640	698670	143300	892980	6	248995	249040	168970	273990	347170	219670	248950	57658000
386	O75347	O75347	O75347	Tubulin-specific chaperone A	TBCA	sp|O75347|TBCA_HUMAN Tubulin-specific chaperone A OS=Homo sapiens (Human) GN=TBCA PE=1 SV=3	---	Cytoskeleton	TBCA	---	---	---	---	---	---	---	1	3	34.3	12.855	108	0	116.24	2411600	2390600	2227700	3028500	1567700	4823500	5406400		5812100	3484900	5192200	4	400185	401930	398440	371280	504760	5	803910	261290	803910	901070		968690	580820	11457000
387	O75348;O95670	O75348	O75348	V-type proton ATPase subunit G 1	ATP6V1G1	sp|O75348|VATG1_HUMAN V-type proton ATPase subunit G 1 OS=Homo sapiens (Human) GN=ATP6V1G1 PE=1 SV=3	---	---	---	---	---	---	---	---	---	---	2	6	55.1	13.757	118	0	222.65	5690700	5652300	9040600	10426000	463180	729620	112210	1056900	229330	120740	4788800	4	1052230	812960	807470	1291500	1489400	6	49465.5	66169	104230	16030	150990	32762	17249	41699000
388	O75351	O75351	O75351	Vacuolar protein sorting-associated protein 4B	VPS4B	sp|O75351|VPS4B_HUMAN Vacuolar protein sorting-associated protein 4B OS=Homo sapiens (Human) GN=VPS4B PE=1 SV=2	---	---	---	---	---	---	---	---	---	---	1	7	28.4	49.301	444	0	152.8	1644900	1460500	1523900	144330		368140	446450	255280			233740	4	59688.5	65796	58419	60958	5773.1	3	14726		14726	17858	10211			1580700
389	O75352	O75352	O75352	Mannose-P-dolichol utilization defect 1 protein	MPDU1	sp|O75352|MPU1_HUMAN Mannose-P-dolichol utilization defect 1 protein OS=Homo sapiens (Human) GN=MPDU1 PE=1 SV=2	---	---	---	---	---	---	---	---	---	---	1	3	17	26.638	247	0	33.632	755010	934130	1118100	609110							854090	4	211140	188750	233530	279520	152280	0								4242800
390	O75356	O75356	O75356	Ectonucleoside triphosphate diphosphohydrolase 5	ENTPD5	sp|O75356|ENTP5_HUMAN Ectonucleoside triphosphate diphosphohydrolase 5 OS=Homo sapiens (Human) GN=ENTPD5 PE=1 SV=1	---	---	---	---	---	---	---	---	---	---	1	7	32.9	47.517	428	0	34.704	987080	748410	1984400	1727900	320960	153380	164240	1334300	1482500	1494000	495100	4	64643	47004	35639	94496	82282	6	39410	15284	7303.6	7820.8	63536	70596	71144	1750200
391	O75366	O75366	O75366	Advillin	AVIL	sp|O75366|AVIL_HUMAN Advillin OS=Homo sapiens (Human) GN=AVIL PE=1 SV=3	---	---	---	---	---	---	---	---	---	---	1	1	2.4	92.026	819	0.0071036	2.4513	538040		717040								27891	2	13945.5	11957		15934		0								564970
392	O75367;Q9P0M6	O75367;Q9P0M6	O75367	Core histone macro-H2A.1;Core histone macro-H2A.2	H2AFY;H2AFY2	sp|O75367|H2AY_HUMAN Core histone macro-H2A.1 OS=Homo sapiens (Human) GN=H2AFY PE=1 SV=4;sp|Q9P0M6|H2AW_HUMAN Core histone macro-H2A.2 OS=Homo sapiens (Human) GN=H2AFY2 PE=1 SV=3	---	---	---	---	---	---	---	---	---	---	2	2	10.5	39.617	372	0	13.326	117170	51977					119710				16048	2	4698.6	6509.6	2887.6			1	6650.5			6650.5
393	O75368	O75368	O75368	SH3 domain-binding glutamic acid-rich-like protein	SH3BGRL	sp|O75368|SH3L1_HUMAN SH3 domain-binding glutamic acid-rich-like protein OS=Homo sapiens (Human) GN=SH3BGRL PE=1 SV=1	---	---	---	---	---	---	---	---	---	---	1	8	89.5	12.774	114	0	88.487	9465600	7303800	10273000	16815000	1412500	724310		116000		972230	5885200	4	1233650	1183200	912970	1284100	2101800	4	106034	176570	90538		14500		121530	52647000
394	O75369;Q14315	O75369	O75369	Filamin-B	FLNB	sp|O75369|FLNB_HUMAN Filamin-B OS=Homo sapiens (Human) GN=FLNB PE=1 SV=2	---	---	---	---	---	---	---	---	---	---	2	77	51.8	278.16	2602	0	323.31	35639000	14090000	18323000	32422000	11326000	9877200	13734000	13931000	16270000	16958000	1285700	4	178685	250980	99222	129040	228330	6	97411	79759	69557	96719	98103	114580	119430	31845000
395	O75380	O75380	O75380	NADH dehydrogenase [ubiquinone] iron-sulfur protein 6, mitochondrial	NDUFS6	sp|O75380|NDUS6_HUMAN NADH dehydrogenase [ubiquinone] iron-sulfur protein 6, mitochondrial OS=Homo sapiens (Human) GN=NDUFS6 PE=1 SV=1	---	---	---	---	---	---	---	---	---	---	1	2	29	13.711	124	0	11.596	368660	133470		254700	125860		123780	291770	126440	133910	194820	3	31838	46083	16683		31838	5	15806	15733		15472	36471	15806	16738
396	O75381	O75381	O75381	Peroxisomal membrane protein PEX14	PEX14	sp|O75381|PEX14_HUMAN Peroxisomal membrane protein PEX14 OS=Homo sapiens (Human) GN=PEX14 PE=1 SV=1	---	---	---	---	---	---	---	---	---	---	1	4	31	41.236	377	0	36.73	982940	1273500	408700	976310							242760	4	65308.5	65529	84901	27247	65088	0								765220
397	O75390	O75390	O75390	Citrate synthase, mitochondrial	CS	sp|O75390|CISY_HUMAN Citrate synthase, mitochondrial OS=Homo sapiens (Human) GN=CS PE=1 SV=2	FOXO1	---	---	---	---	---	---	---	---	---	1	17	50.9	51.712	466	0	323.31	19637000	25270000	19544000	36537000	4804300	6803400	5839400	7329300	7032100	6639900	7338700	4	1181750	1033500	1330000	1028700	1923000	6	353770	252860	358070	307330	385750	370110	349470	46620000
398	O75394	O75394	O75394	39S ribosomal protein L33, mitochondrial	MRPL33	sp|O75394|RM33_HUMAN 39S ribosomal protein L33, mitochondrial OS=Homo sapiens (Human) GN=MRPL33 PE=1 SV=1	---	---	---	---	---	---	---	---	---	---	1	1	21.5	7.6191	65	0.0019522	3.4652		79886									26629	1	26629		26629			0
399	O75396	O75396	O75396	Vesicle-trafficking protein SEC22b	SEC22B	sp|O75396|SC22B_HUMAN Vesicle-trafficking protein SEC22b OS=Homo sapiens (Human) GN=SEC22B PE=1 SV=4	---	---	---	---	---	---	---	---	---	---	1	9	43.3	24.593	215	0	260.41	16236000	13672000	11715000	15695000	2642300	2844900	2239000	1411900	2551200	3294400	5164400	4	1048820	1159700	976540	836760	1121100	6	185485	188740	203200	159930	100850	182230	235320	44917000
400	O75400	O75400	O75400	Pre-mRNA-processing factor 40 homolog A	PRPF40A	sp|O75400|PR40A_HUMAN Pre-mRNA-processing factor 40 homolog A OS=Homo sapiens (Human) GN=PRPF40A PE=1 SV=2	---	---	---	---	---	---	---	---	---	---	1	5	8.6	108.8	957	0	34.999	678140	182450	335310	387460							47981	4	10951	20550	5528.9	10161	11741	0								474640
401	O75420	O75420	O75420	PERQ amino acid-rich with GYF domain-containing protein 1	GIGYF1	sp|O75420|PERQ1_HUMAN PERQ amino acid-rich with GYF domain-containing protein 1 OS=Homo sapiens (Human) GN=GIGYF1 PE=1 SV=2	---	---	---	---	---	---	---	---	---	---	1	2	2.7	114.6	1035	0.00028011	6.7752				217700						66138	6039	1	4631.8				4631.8	1	1407.2						1407.2
402	O75431	O75431	O75431	Metaxin-2	MTX2	sp|O75431|MTX2_HUMAN Metaxin-2 OS=Homo sapiens (Human) GN=MTX2 PE=1 SV=1	---	---	---	---	---	---	---	---	---	---	1	3	25.1	29.763	263	0	9.5974	880290	366620	527980	584760							214510	4	50579.5	80026	33330	47999	53160	0								1405500
403	O75436	O75436	O75436	Vacuolar protein sorting-associated protein 26A	VPS26A	sp|O75436|VP26A_HUMAN Vacuolar protein sorting-associated protein 26A OS=Homo sapiens (Human) GN=VPS26A PE=1 SV=2	---	---	---	---	---	---	---	---	---	---	1	8	33	38.169	327	0	76.571	1134700	2452400	888110	209490	613240	278880	292730	338750	298390	329820	359820	4	53233	59724	129080	46742	11026	6	16532	32276	14678	15407	17829	15705	17359
404	O75438	O75438	O75438	NADH dehydrogenase [ubiquinone] 1 beta subcomplex subunit 1	NDUFB1	sp|O75438|NDUB1_HUMAN NADH dehydrogenase [ubiquinone] 1 beta subcomplex subunit 1 OS=Homo sapiens (Human) GN=NDUFB1 PE=1 SV=1	---	---	---	---	---	---	---	---	---	---	1	1	19	6.9611	58	0.00054083	5.7178	1097400	1057400	1055300	1116100	332580						1552900	4	359140	365810	352470	351750	372020	1	110860	110860						6959300
405	O75439	O75439	O75439	Mitochondrial-processing peptidase subunit beta	PMPCB	sp|O75439|MPPB_HUMAN Mitochondrial-processing peptidase subunit beta OS=Homo sapiens (Human) GN=PMPCB PE=1 SV=2	---	---	---	---	---	---	---	---	---	---	1	10	33.9	54.366	489	0	220.93	7650600	4868300	2924600	3148300	993950	600070	648450	449300	607080	655680	867170	4	154165	294250	187240	112490	121090	6	24144.5	38229	23080	24940	17281	23349	25219	6973700
406	O75452	O75452	O75452	Retinol dehydrogenase 16	RDH16	sp|O75452|RDH16_HUMAN Retinol dehydrogenase 16 OS=Homo sapiens (Human) GN=RDH16 PE=1 SV=2	---	---	---	---	---	---	---	---	---	---	1	4	16.7	35.673	317	0	11.073	290920	1195600	937260	264970							149370	4	34116	16162	66421	52070	14720	0								876230
407	O75475	O75475	O75475	PC4 and SFRS1-interacting protein	PSIP1	sp|O75475|PSIP1_HUMAN PC4 and SFRS1-interacting protein OS=Homo sapiens (Human) GN=PSIP1 PE=1 SV=1	---	---	---	---	---	---	---	---	---	---	1	2	4.7	60.103	530	0.0044864	2.8878	1509900		151020	198530							66408	3	7090.3	53924		5393.5	7090.3	0
408	Q9Y625;O75487	Q9Y625;O75487	Q9Y625	Glypican-6;Secreted glypican-6;Glypican-4;Secreted glypican-4	GPC6;GPC4	sp|Q9Y625|GPC6_HUMAN Glypican-6 OS=Homo sapiens (Human) GN=GPC6 PE=1 SV=1;sp|O75487|GPC4_HUMAN Glypican-4 OS=Homo sapiens (Human) GN=GPC4 PE=1 SV=4	---	ECM	Glypican (proteoglycan)	---	---	---	---	---	---	---	2	1	3.1	62.735	555	0	10.029	261890			295190							20632	2	10316.2	9699.5			10933	0								357540
409	O75489	O75489	O75489	NADH dehydrogenase [ubiquinone] iron-sulfur protein 3, mitochondrial	NDUFS3	sp|O75489|NDUS3_HUMAN NADH dehydrogenase [ubiquinone] iron-sulfur protein 3, mitochondrial OS=Homo sapiens (Human) GN=NDUFS3 PE=1 SV=1	---	---	---	---	---	---	---	---	---	---	1	8	42.4	30.241	264	0	96.229	10357000	7297500	7863400	8774400	578680	404410	104880	130130	103120	103740	2101000	4	489345	609240	429260	462550	516140	6	6912.15	34040	23789	6169.3	7655	6065.8	6102.6	19325000
410	O75494	O75494	O75494	Serine/arginine-rich splicing factor 10	SRSF10	sp|O75494|SRS10_HUMAN Serine/arginine-rich splicing factor 10 OS=Homo sapiens (Human) GN=SRSF10 PE=1 SV=1	---	---	---	---	---	---	---	---	---	---	1	1	6.1	31.3	262	0	8.7148	467920		126740	512120	362490	377330	404210	379370	370290	365690	374020	3	51991	51991		14082	56903	6	41534.5	40277	41926	44912	42152	41143	40632	1115300
411	O75521	O75521	O75521	Enoyl-CoA delta isomerase 2, mitochondrial	ECI2	sp|O75521|ECI2_HUMAN Enoyl-CoA delta isomerase 2, mitochondrial OS=Homo sapiens (Human) GN=ECI2 PE=1 SV=4	PPARA	---	---	---	---	---	---	---	---	---	1	20	60.7	43.585	394	0	323.31	9856800	22865000	21576000	21033000	7775900	8384300	10245000	6134500	7068400	5621800	6345300	4	1121300	518780	1203400	1135600	1107000	6	390640	409260	441280	539200	322870	372020	295880	23337000
413	O75531	O75531	O75531	Barrier-to-autointegration factor;Barrier-to-autointegration factor, N-terminally processed	BANF1	sp|O75531|BAF_HUMAN Barrier-to-autointegration factor OS=Homo sapiens (Human) GN=BANF1 PE=1 SV=1	---	---	---	---	---	---	---	---	---	---	1	6	60.7	10.058	89	0	34.287	2615300	3733100	8147100	1668500	1028900	1736800	1396400	1073000	1297400	1069700	3961000	4	529030	435880	622180	1357900	278090	6	197530	171490	289470	232730	178830	216230	178280	10701000
414	O75533	O75533	O75533	Splicing factor 3B subunit 1	SF3B1	sp|O75533|SF3B1_HUMAN Splicing factor 3B subunit 1 OS=Homo sapiens (Human) GN=SF3B1 PE=1 SV=3	HNF4A	---	---	---	---	---	---	---	---	---	1	33	38	145.83	1304	0	323.31	15342000	4827000	9293400	16224000	769440	637720	1354900	136430	689010	720320	806340	4	198665	247440	77855	149890	261670	6	11365.5	12410	10286	21854	2200.5	11113	11618	13087000
415	O75534	O75534	O75534	Cold shock domain-containing protein E1	CSDE1	sp|O75534|CSDE1_HUMAN Cold shock domain-containing protein E1 OS=Homo sapiens (Human) GN=CSDE1 PE=1 SV=2	---	---	---	---	---	---	---	---	---	---	1	11	17.9	88.884	798	0	105.88	1401800	790330	956120	1045900	300840	744290	443000		478690	321730	140930	4	21761.5	30474	17181	20785	22738	5	9630.3	6539.9	16180	9630.3		10406	6994.1	1352100
416	O75553	O75553	O75553	Disabled homolog 1	DAB1	sp|O75553|DAB1_HUMAN Disabled homolog 1 OS=Homo sapiens (Human) GN=DAB1 PE=1 SV=3	---	---	---	---	---	---	---	---	---	---	1	1	1.7	63.774	588	0.0017224	3.6523	178600	101030	162520	167480							32086	4	8684.25	9400.2	5317.4	8553.5	8815	0								140820
417	O75569	O75569	O75569	Interferon-inducible double-stranded RNA-dependent protein kinase activator A	PRKRA	sp|O75569|PRKRA_HUMAN Interferon-inducible double-stranded RNA-dependent protein kinase activator A OS=Homo sapiens (Human) GN=PRKRA PE=1 SV=1	---	---	---	---	---	---	---	---	---	---	1	4	16.6	34.404	313	0	16.228	540730	3200500	2129500	1694400	289200		406100		355910		615460	4	136570	38623	228610	152110	121030	3	25422	20657		29007		25422		1273000
418	O75575	O75575	O75575	DNA-directed RNA polymerase III subunit RPC9	CRCP	sp|O75575|RPC9_HUMAN DNA-directed RNA polymerase III subunit RPC9 OS=Homo sapiens (Human) GN=CRCP PE=1 SV=1	---	---	---	---	---	---	---	---	---	---	1	1	13.5	16.871	148	0.005597	2.7039	95832										11979	1	11979	11979				0								416170
419	O75600	O75600	O75600	2-amino-3-ketobutyrate coenzyme A ligase, mitochondrial	GCAT	sp|O75600|KBL_HUMAN 2-amino-3-ketobutyrate coenzyme A ligase, mitochondrial OS=Homo sapiens (Human) GN=GCAT PE=1 SV=1	---	---	---	---	---	---	---	---	---	---	1	2	10	45.285	419	0	36.668	519070	520610	748890	349620		180270	388260	153730	352920	154530	198110	4	30579	30534	30624	44052	20566	5	10604		10604	22839	9043	20760	9090.2	615120
420	O75607	O75607	O75607	Nucleoplasmin-3	NPM3	sp|O75607|NPM3_HUMAN Nucleoplasmin-3 OS=Homo sapiens (Human) GN=NPM3 PE=1 SV=3	---	---	---	---	---	---	---	---	---	---	1	2	20.8	19.343	178	0	103.15	1466100	1364100	696840	2037000							695500	4	176885	183260	170510	87105	254620	0								6373900
421	O75608	O75608	O75608	Acyl-protein thioesterase 1	LYPLA1	sp|O75608|LYPA1_HUMAN Acyl-protein thioesterase 1 OS=Homo sapiens (Human) GN=LYPLA1 PE=1 SV=1	---	---	---	---	---	---	---	---	---	---	1	8	67.8	24.669	230	0	140	14221000	10560000	9343100	13165000	2088900	1643200	1169600	1553300	1069500	608190	4618500	4	988555	1185100	880010	778590	1097100	6	113452	174070	136930	97464	129440	89127	50683	33709000
422	O75629	O75629	O75629	Protein CREG1	CREG1	sp|O75629|CREG1_HUMAN Protein CREG1 OS=Homo sapiens (Human) GN=CREG1 PE=1 SV=1	---	---	---	---	---	---	---	---	---	---	1	3	18.2	24.074	220	0	24.887	4522300	192960	1586000	2700400	1346700	1273500	1402700	1423300	1395000	2065800	1989900	4	238135	502480	21440	176220	300050	6	155425	149640	141500	155850	158140	155000	229530	8224500
423	O75643	O75643	O75643	U5 small nuclear ribonucleoprotein 200 kDa helicase	SNRNP200	sp|O75643|U520_HUMAN U5 small nuclear ribonucleoprotein 200 kDa helicase OS=Homo sapiens (Human) GN=SNRNP200 PE=1 SV=2	---	---	---	---	---	---	---	---	---	---	1	23	15.8	244.5	2136	0	135.5	4895900	2749000	5084600	3310500			325310		260070	255310	143060	4	34772.5	41490	23296	43090	28055	3	2204			2756.8		2204	2163.6	3697700
424	O75663	O75663	O75663	TIP41-like protein	TIPRL	sp|O75663|TIPRL_HUMAN TIP41-like protein OS=Homo sapiens (Human) GN=TIPRL PE=1 SV=2	---	---	---	---	---	---	---	---	---	---	1	5	25	31.444	272	0	11.493	906790	745370	1564200	459580	75893		349020			75563	261020	4	51630	56674	46586	97760	28724	3	4743.3	4743.3		21814			4722.7	912980
425	O75674	O75674	O75674	TOM1-like protein 1	TOM1L1	sp|O75674|TM1L1_HUMAN TOM1-like protein 1 OS=Homo sapiens (Human) GN=TOM1L1 PE=1 SV=2	---	---	---	---	---	---	---	---	---	---	1	6	28.8	52.988	476	0	36.508	1064900	549670	718680	531160		284650	273900			309920	248860	4	42278.5	70991	36645	47912	35411	3	18977		18977	18260			20661	867500
426	O75688	O75688	O75688	Protein phosphatase 1B	PPM1B	sp|O75688|PPM1B_HUMAN Protein phosphatase 1B OS=Homo sapiens (Human) GN=PPM1B PE=1 SV=1	---	---	---	---	---	---	---	---	---	---	1	2	6.3	52.642	479	0.0019565	3.4952			239680		304270	293980			204440		47381	1	10894			10894		3	13363	13831	13363			9292.8
427	O75694	O75694	O75694	Nuclear pore complex protein Nup155	NUP155	sp|O75694|NU155_HUMAN Nuclear pore complex protein Nup155 OS=Homo sapiens (Human) GN=NUP155 PE=1 SV=1	---	---	---	---	---	---	---	---	---	---	1	19	22.6	155.2	1391	0	105.83	4953400	2913100	4301700	4854000		91928					300250	4	80313.5	86902	51106	75468	85159	1	1612.8		1612.8					4830800
428	O75718	O75718	O75718	Cartilage-associated protein	CRTAP	sp|O75718|CRTAP_HUMAN Cartilage-associated protein OS=Homo sapiens (Human) GN=CRTAP PE=1 SV=1	---	---	---	---	---	---	---	---	---	---	1	6	19.5	46.561	401	0	48.499	1097500	970180	592650	1583100		86326					173190	4	41353	43899	38807	23706	63324	1	3453.1		3453.1					1233100
429	O75764	O75764	O75764	Transcription elongation factor A protein 3	TCEA3	sp|O75764|TCEA3_HUMAN Transcription elongation factor A protein 3 OS=Homo sapiens (Human) GN=TCEA3 PE=1 SV=2	---	---	---	---	---	---	---	---	---	---	1	1	3.7	38.971	348	0	40.665	222300	289780	306790	274780	247790		276570	271030	278470	272690	128430	4	14857	11700	15252	16147	14462	5	14352	13041		14556	14265	14656	14352	301760
430	O75794	O75794	O75794	Cell division cycle protein 123 homolog	CDC123	sp|O75794|CD123_HUMAN Cell division cycle protein 123 homolog OS=Homo sapiens (Human) GN=CDC123 PE=1 SV=1	---	---	---	---	---	---	---	---	---	---	1	1	3	39.134	336	0.0042624	2.9255		70797									4424.8	1	4424.8		4424.8			0
431	O75817	O75817	O75817	Ribonuclease P protein subunit p20	POP7	sp|O75817|POP7_HUMAN Ribonuclease P protein subunit p20 OS=Homo sapiens (Human) GN=POP7 PE=1 SV=2	---	---	---	---	---	---	---	---	---	---	1	1	10.7	15.651	140	0	13.232	658590			532450		317080					301620	2	119105	131720			106490	1	63417		63417					2860000
432	O75821	O75821	O75821	Eukaryotic translation initiation factor 3 subunit G	EIF3G	sp|O75821|EIF3G_HUMAN Eukaryotic translation initiation factor 3 subunit G OS=Homo sapiens (Human) GN=EIF3G PE=1 SV=2	---	---	---	---	---	---	---	---	---	---	1	10	55.6	35.611	320	0	128.13	4176200	2673800	2395200	4867200	972100	1027400	1163800	1287100	197900	1375700	1059800	4	180265	219800	140730	126070	256170	6	57661.5	51163	54072	61251	67744	10416	72406	4272200
433	O75822	O75822	O75822	Eukaryotic translation initiation factor 3 subunit J	EIF3J	sp|O75822|EIF3J_HUMAN Eukaryotic translation initiation factor 3 subunit J OS=Homo sapiens (Human) GN=EIF3J PE=1 SV=2	---	---	---	---	---	---	---	---	---	---	1	3	14	29.062	258	0	9.4916	861310	1597100	794660		231080	217720	186560	199940	210320	202110	321480	3	61522	61522	114080	56761		6	14730	16505	15552	13325	14282	15023	14437	1125400
434	O75828	O75828	O75828	Carbonyl reductase [NADPH] 3	CBR3	sp|O75828|CBR3_HUMAN Carbonyl reductase [NADPH] 3 OS=Homo sapiens (Human) GN=CBR3 PE=1 SV=3	---	---	---	---	---	---	---	---	---	---	1	1	2.9	30.85	277	0.00078023	4.7762		6080700			2465700	2594000	2770900	2755800	2570900	2713600	1372000	1	380040		380040			6	165865	154110	162130	173180	172240	160680	169600
435	O75832	O75832	O75832	26S proteasome non-ATPase regulatory subunit 10	PSMD10	sp|O75832|PSD10_HUMAN 26S proteasome non-ATPase regulatory subunit 10 OS=Homo sapiens (Human) GN=PSMD10 PE=1 SV=1	HNF4A	Degradation	Ubiquitin proteasome system (UPS)	---	---	---	---	---	---	---	1	7	39.8	24.428	226	0	210.14	1686600	441260	1538800	3212600	381590	802170	555250	593070	741720	644490	883120	4	134390	140550	36771	128230	267710	6	51564.5	31799	66848	46270	49422	61810	53707	3974800
436	O75843	O75843	O75843	AP-1 complex subunit gamma-like 2	AP1G2	sp|O75843|AP1G2_HUMAN AP-1 complex subunit gamma-like 2 OS=Homo sapiens (Human) GN=AP1G2 PE=1 SV=1	---	---	---	---	---	---	---	---	---	---	1	2	3.4	87.116	785	0.00076687	4.3909	93590		765970	99088							25909	3	2678.1	2529.5		20702	2678.1	0								328950
437	O75844	O75844	O75844	CAAX prenyl protease 1 homolog	ZMPSTE24	sp|O75844|FACE1_HUMAN CAAX prenyl protease 1 homolog OS=Homo sapiens (Human) GN=ZMPSTE24 PE=1 SV=2	---	---	---	---	---	---	---	---	---	---	1	3	10.9	54.812	475	0	15.564	92129	524600	419440	96391							59608	4	13574.6	4848.9	27611	22076	5073.2	0								255000
438	O75874	O75874	O75874	Isocitrate dehydrogenase [NADP] cytoplasmic	IDH1	sp|O75874|IDHC_HUMAN Isocitrate dehydrogenase [NADP] cytoplasmic OS=Homo sapiens (Human) GN=IDH1 PE=1 SV=2	---	---	---	---	---	---	---	---	---	---	1	24	62.6	46.659	414	0	323.31	92214000	102760000	149540000	91761000	42859000	37131000	28354000	38846000	26573000	46961000	26280000	4	3899550	3688600	4110500	5981600	3670400	6	1519600	1714400	1485300	1134200	1553900	1062900	1878400	131890000
439	O75879	O75879	O75879	Glutamyl-tRNA(Gln) amidotransferase subunit B, mitochondrial	GATB	sp|O75879|GATB_HUMAN Glutamyl-tRNA(Gln) amidotransferase subunit B, mitochondrial OS=Homo sapiens (Human) GN=GATB PE=1 SV=1	---	---	---	---	---	---	---	---	---	---	1	3	12	61.863	557	0	16.655		914600	861730	225980							69045	3	29715		31538	29715	7792.4	0
440	O75881	O75881	O75881	25-hydroxycholesterol 7-alpha-hydroxylase	CYP7B1	sp|O75881|CP7B1_HUMAN 25-hydroxycholesterol 7-alpha-hydroxylase OS=Homo sapiens (Human) GN=CYP7B1 PE=1 SV=2	PPARA	---	---	---	---	---	---	---	CYP7B1	---	1	2	7.1	58.255	506	0	58.653	377250	629120	172130	314080							57407	4	13295	14510	24197	6620.3	12080	0								458050
441	O75884	O75884	O75884	Putative hydrolase RBBP9	RBBP9	sp|O75884|RBBP9_HUMAN Putative hydrolase RBBP9 OS=Homo sapiens (Human) GN=RBBP9 PE=1 SV=2	---	---	---	---	---	---	---	---	---	---	1	7	59.7	21	186	0	95.054	5901900	3880000	5627400	3292200	159680	166230	165360			152170	1934500	4	475370	590190	388000	562740	329220	4	16252	15968	16623	16536			15217	22967000
442	O75886	O75886	O75886	Signal transducing adapter molecule 2	STAM2	sp|O75886|STAM2_HUMAN Signal transducing adapter molecule 2 OS=Homo sapiens (Human) GN=STAM2 PE=1 SV=1	---	---	---	---	---	---	---	---	---	---	1	3	8.2	58.164	525	0	7.4465	603320	491380	387140	424210							79419	4	19074.5	25138	20474	16131	17675	0								453530
443	O75891	O75891	O75891	Cytosolic 10-formyltetrahydrofolate dehydrogenase	ALDH1L1	sp|O75891|AL1L1_HUMAN Cytosolic 10-formyltetrahydrofolate dehydrogenase OS=Homo sapiens (Human) GN=ALDH1L1 PE=1 SV=2	---	---	---	---	ALDH	---	---	---	---	---	1	57	78.9	98.828	902	0	323.31	161240000	143160000	198930000	144740000	27296000	27431000	38109000	36867000	34662000	40622000	15233000	4	2731900	2879200	2556400	3552400	2584600	6	638650	487420	489840	680530	658340	618960	725390	174020000
444	O75896	O75896	O75896	Tumor suppressor candidate 2	TUSC2	sp|O75896|TUSC2_HUMAN Tumor suppressor candidate 2 OS=Homo sapiens (Human) GN=TUSC2 PE=1 SV=3	---	---	---	---	---	---	---	---	---	---	1	1	10.9	12.074	110	0.0095109	2.2802	275590	349770	328360	298100							208640	4	52205.5	45931	58294	54727	49684	0								1196800
445	O75907	O75907	O75907	Diacylglycerol O-acyltransferase 1	DGAT1	sp|O75907|DGAT1_HUMAN Diacylglycerol O-acyltransferase 1 OS=Homo sapiens (Human) GN=DGAT1 PE=1 SV=2	---	---	---	---	---	---	---	---	---	---	1	3	11.1	55.278	488	0	7.0181	992420	470790		738560							146780	3	49237	66161	31386		49237	0								1049300
446	O75915	O75915	O75915	PRA1 family protein 3	ARL6IP5	sp|O75915|PRAF3_HUMAN PRA1 family protein 3 OS=Homo sapiens (Human) GN=ARL6IP5 PE=1 SV=1	---	---	---	---	---	---	---	---	---	---	1	5	25	21.614	188	0	72.305	10548000	8437700	11781000	11168000	1045900	332410	646680	1046200	322350	615080	9188700	4	2171700	2109700	1687500	2356200	2233700	6	126180	209170	66483	129340	209240	64469	123020	15000000
447	O75925	O75925	O75925	E3 SUMO-protein ligase PIAS1	PIAS1	sp|O75925|PIAS1_HUMAN E3 SUMO-protein ligase PIAS1 OS=Homo sapiens (Human) GN=PIAS1 PE=1 SV=2	GATA4	---	---	---	---	---	---	---	---	---	1	2	4.5	71.835	651	0.00053305	5.4028		219580		314860				176840			25403	2	9543.55		7842.1		11245	1	6315.8				6315.8
448	O75934	O75934	O75934	Pre-mRNA-splicing factor SPF27	BCAS2	sp|O75934|SPF27_HUMAN Pre-mRNA-splicing factor SPF27 OS=Homo sapiens (Human) GN=BCAS2 PE=1 SV=1	---	---	---	---	---	---	---	---	---	---	1	5	39.6	26.131	225	0	26.182	958150	289660	883840	1481400							277930	4	70846	73704	22281	67988	113950	0								2048400
449	O75935	O75935	O75935	Dynactin subunit 3	DCTN3	sp|O75935|DCTN3_HUMAN Dynactin subunit 3 OS=Homo sapiens (Human) GN=DCTN3 PE=1 SV=1	---	---	---	---	---	---	---	---	---	---	1	6	43	21.119	186	0	229.85	2744900	2208600	5972800	2107400	137820	484130	550230	136600	536950	546770	1402400	4	225160	249540	200780	542980	191580	6	46413	12529	44012	50021	12419	48814	49706	19440000
450	O75936	O75936	O75936	Gamma-butyrobetaine dioxygenase	BBOX1	sp|O75936|BODG_HUMAN Gamma-butyrobetaine dioxygenase OS=Homo sapiens (Human) GN=BBOX1 PE=1 SV=1	---	---	---	---	---	---	---	---	---	---	1	2	10.3	44.714	387	0	11.321	105030	134780	443550	104880							39412	4	5995.3	5251.5	6739.1	22177	5244.2	0								208430
451	O75937	O75937	O75937	DnaJ homolog subfamily C member 8	DNAJC8	sp|O75937|DNJC8_HUMAN DnaJ homolog subfamily C member 8 OS=Homo sapiens (Human) GN=DNAJC8 PE=1 SV=2	---	---	---	---	---	DNAJ	---	---	---	---	1	2	14.6	29.841	253	0	27.143	235370	606210	615720	293280							134660	4	34595.5	18105	46631	47363	22560	0								410510
452	O75947	O75947	O75947	ATP synthase subunit d, mitochondrial	ATP5H	sp|O75947|ATP5H_HUMAN ATP synthase subunit d, mitochondrial OS=Homo sapiens (Human) GN=ATP5H PE=1 SV=3	---	---	---	---	---	---	---	---	---	---	1	13	74.5	18.491	161	0	218.96	66551000	29449000	34242000	38766000	6228300	9250400	11585000	9680900	10328000	8143500	22422000	4	3650400	6655100	2944900	3424200	3876600	6	946565	622830	925040	1158500	968090	1032800	814350	163420000
453	O75955	O75955	O75955	Flotillin-1	FLOT1	sp|O75955|FLOT1_HUMAN Flotillin-1 OS=Homo sapiens (Human) GN=FLOT1 PE=1 SV=3	---	---	---	---	---	---	---	---	---	---	1	2	3.3	47.355	427	0	70.773	428220	409830	723870	549740	392050	370270			337720		118950	4	18110.5	15860	15179	26810	20361	3	13714	14521	13714			12508		645550
454	O75964	O75964	O75964	ATP synthase subunit g, mitochondrial	ATP5L	sp|O75964|ATP5L_HUMAN ATP synthase subunit g, mitochondrial OS=Homo sapiens (Human) GN=ATP5L PE=1 SV=3	---	---	---	---	---	---	---	---	---	---	1	7	58.3	11.428	103	0	91.725	34822000	22055000	15677000	31561000	1509400	4011400		1699600	1891700	3034400	19377000	4	4467950	5803700	3675800	2612800	5260100	5	315290	251560	668570		283270	315290	505730	163360000
455	O75970	O75970	O75970	Multiple PDZ domain protein	MPDZ	sp|O75970|MPDZ_HUMAN Multiple PDZ domain protein OS=Homo sapiens (Human) GN=MPDZ PE=1 SV=2	---	---	---	---	---	---	---	---	---	---	1	3	2.7	221.62	2070	0	40.968	225380		265680	641340							12047	3	2826.4	2397.7		2826.4	6822.7	0								393220
456	O75976	O75976	O75976	Carboxypeptidase D	CPD	sp|O75976|CBPD_HUMAN Carboxypeptidase D OS=Homo sapiens (Human) GN=CPD PE=1 SV=2	---	---	---	---	---	---	---	---	---	---	1	19	23.3	152.93	1380	0	113.94	4621000	2315700	2871100	3169100	634210	301310	517000	371430	816240	309560	224320	4	42536.5	65084	32615	40438	44635	6	6256.55	8932.5	4243.8	7281.7	5231.4	11496	4360	3372700
457	O76003	O76003	O76003	Glutaredoxin-3	GLRX3	sp|O76003|GLRX3_HUMAN Glutaredoxin-3 OS=Homo sapiens (Human) GN=GLRX3 PE=1 SV=2	---	---	---	---	---	---	---	---	---	---	1	10	55.5	37.432	335	0	90.937	3189200	3741300	5197300	3590500	317420	608790		903340	600450	1225100	1076300	4	203660	177180	207850	288740	199470	5	33822	17634	33822		50186	33358	68064	4649000
458	O76021	O76021	O76021	Ribosomal L1 domain-containing protein 1	RSL1D1	sp|O76021|RL1D1_HUMAN Ribosomal L1 domain-containing protein 1 OS=Homo sapiens (Human) GN=RSL1D1 PE=1 SV=3	---	---	---	---	---	---	---	---	---	---	1	10	24.3	54.972	490	0	76.721	2476200	2723000	3773300	1220000					279040	769840	510970	4	118160	112550	123770	171510	55455	2	23838					12683	34993	2256300
459	O76024	O76024	O76024	Wolframin	WFS1	sp|O76024|WFS1_HUMAN Wolframin OS=Homo sapiens (Human) GN=WFS1 PE=1 SV=2	---	---	---	---	---	---	---	---	---	---	1	2	3.5	100.29	890	0.0010139	4.2475	244080		367760								16536	2	8268.2	6596.8		9939.6		0								210480
460	O76027	O76027	O76027	Annexin A9	ANXA9	sp|O76027|ANXA9_HUMAN Annexin A9 OS=Homo sapiens (Human) GN=ANXA9 PE=1 SV=3	---	---	---	---	---	---	---	---	---	---	1	3	13.6	38.363	345	0.00053821	5.6091	403160		787770								51779	2	25890	17529		34251		0								710160
461	O76031	O76031	O76031	ATP-dependent Clp protease ATP-binding subunit clpX-like, mitochondrial	CLPX	sp|O76031|CLPX_HUMAN ATP-dependent Clp protease ATP-binding subunit clpX-like, mitochondrial OS=Homo sapiens (Human) GN=CLPX PE=1 SV=2	---	---	---	---	---	---	---	---	---	---	1	6	11.4	69.223	633	0	74.458	270400	342000	390230	580640		179380		126150	175760	500830	65779	4	9387.55	6933.4	8769.1	10006	14888	4	4553.1		4599.5		3234.7	4506.7	12842	442400
462	O76054;Q9UDX4	O76054	O76054	SEC14-like protein 2	SEC14L2	sp|O76054|S14L2_HUMAN SEC14-like protein 2 OS=Homo sapiens (Human) GN=SEC14L2 PE=1 SV=1	---	---	---	---	---	---	---	---	---	---	2	10	39.5	46.145	403	0	141.17	3239400	5466400	4845000	4595900	1341900	3480200	2332400	3633400	3789000	2910900	1875500	4	248445	170490	287710	255000	241890	6	168190	70624	183170	122760	191230	199420	153210	6018600
463	O76071	O76071	O76071	Probable cytosolic iron-sulfur protein assembly protein CIAO1	CIAO1	sp|O76071|CIAO1_HUMAN Probable cytosolic iron-sulfur protein assembly protein CIAO1 OS=Homo sapiens (Human) GN=CIAO1 PE=1 SV=1	---	---	---	---	---	---	---	---	---	---	1	5	25.4	37.84	339	0	73.855	109820	1079700	958450	731000	151080	144580	167010	130570	137540	142640	234520	4	52795	6863.7	67481	59903	45687	6	8975.85	9442.3	9036.4	10438	8160.4	8596.2	8915.3
464	Q13068;P0CL82;P0CL81;P0CL80;O76087;Q13065	Q13068;P0CL82;P0CL81;P0CL80;O76087;Q13065	Q13068	G antigen 4;G antigen 12I;G antigen 12G;G antigen 12F;G antigen 7;G antigen 1	GAGE4;GAGE12I;GAGE12G;GAGE12F;GAGE7;GAGE1	sp|Q13068|GAGE4_HUMAN G antigen 4 OS=Homo sapiens (Human) GN=GAGE4 PE=1 SV=2;sp|P0CL82|GG12I_HUMAN G antigen 12I OS=Homo sapiens (Human) GN=GAGE12I PE=1 SV=1;sp|P0CL81|GG12G_HUMAN G antigen 12G OS=Homo sapiens (Human) GN=GAGE12G PE=3 SV=1;sp|P0CL80|GG12	---	---	---	---	---	---	---	---	---	---	6	1	29.9	12.885	117	0.00054069	5.713						322190	330370		372440		205000	0						3	66073		64438	66073		74488
465	O76094	O76094	O76094	Signal recognition particle subunit SRP72	SRP72	sp|O76094|SRP72_HUMAN Signal recognition particle subunit SRP72 OS=Homo sapiens (Human) GN=SRP72 PE=1 SV=3	---	---	---	---	---	---	---	---	---	---	1	10	27.6	74.605	671	0	68.217	2235100	1835200	2736000	1044700	192660	293670		783180	348090	393540	298850	4	61671	67730	55612	82909	31656	5	10548	5838	8898.9		23733	10548	11926	1855100
466	O94760	O94760	O94760	N(G),N(G)-dimethylarginine dimethylaminohydrolase 1	DDAH1	sp|O94760|DDAH1_HUMAN N(G),N(G)-dimethylarginine dimethylaminohydrolase 1 OS=Homo sapiens (Human) GN=DDAH1 PE=1 SV=3	---	---	---	---	---	---	---	---	---	---	1	10	61.8	31.121	285	0	323.31	6113100	11086000	14347000	5958700	2215400	646790	2745300	3877700	2832400	2957300	3104700	4	505840	359590	652090	843970	350510	6	164050	130320	38046	161490	228100	166610	173960	12653000
467	O94776	O94776	O94776	Metastasis-associated protein MTA2	MTA2	sp|O94776|MTA2_HUMAN Metastasis-associated protein MTA2 OS=Homo sapiens (Human) GN=MTA2 PE=1 SV=1	---	---	---	---	---	---	---	---	---	---	1	2	5.1	75.022	668	0	87.812	510630		382060	948540	128360	121640			123150	145060	52432	3	11347	11347		8490.2	21079	4	2794.45	2852.3	2703.2			2736.6	3223.6	711260
468	O94804	O94804	O94804	Serine/threonine-protein kinase 10	STK10	sp|O94804|STK10_HUMAN Serine/threonine-protein kinase 10 OS=Homo sapiens (Human) GN=STK10 PE=1 SV=1	---	---	---	---	---	---	---	---	---	---	1	2	3.7	112.13	968	0	10.189	299060		295580	184550							16939	3	6425.8	6501.3		6425.8	4012	0								299060
469	O94811	O94811	O94811	Tubulin polymerization-promoting protein	TPPP	sp|O94811|TPPP_HUMAN Tubulin polymerization-promoting protein OS=Homo sapiens (Human) GN=TPPP PE=1 SV=1	---	Cytoskeleton	tubulin-associated	---	---	---	---	---	---	---	1	2	13.2	23.693	219	0	13.927	336390	322060	315140		144970			137310		136080	126540	3	29279	30581	29279	28649		3	12483	13179			12483		12370	727990
470	O94822	O94822	O94822	E3 ubiquitin-protein ligase listerin	LTN1	sp|O94822|LTN1_HUMAN E3 ubiquitin-protein ligase listerin OS=Homo sapiens (Human) GN=LTN1 PE=1 SV=6	---	---	---	---	---	---	---	---	---	---	1	5	6	200.55	1766	0	11.323	660150		345760	856720							20468	3	7254.4	7254.4		3799.6	9414.5	0								608140
471	O94826	O94826	O94826	Mitochondrial import receptor subunit TOM70	TOMM70A	sp|O94826|TOM70_HUMAN Mitochondrial import receptor subunit TOM70 OS=Homo sapiens (Human) GN=TOMM70A PE=1 SV=1	---	---	---	---	---	---	---	---	---	---	1	11	30.8	67.454	608	0	259.8	4048000	4248600	3572000	3144300	1550700	779680	1258400	1606300	1323500	1619300	746800	4	122900	130580	137050	115220	101430	6	46357.5	50021	25151	40595	51818	42694	52234	4444100
472	O94832	O94832	O94832	Unconventional myosin-Id	MYO1D	sp|O94832|MYO1D_HUMAN Unconventional myosin-Id OS=Homo sapiens (Human) GN=MYO1D PE=1 SV=2	---	---	---	---	---	---	---	---	---	---	1	4	5.1	116.2	1006	0.00079851	5.3346		212540		2197000				220510			42420	2	19431.5		3428		35435	1	3556.5				3556.5
473	O94842;O94900;O15405	O94842	O94842	TOX high mobility group box family member 4	TOX4	sp|O94842|TOX4_HUMAN TOX high mobility group box family member 4 OS=Homo sapiens (Human) GN=TOX4 PE=1 SV=1	---	---	---	---	---	---	---	---	---	---	3	4	9.7	66.194	621	0	15.046	588120	283200	487660	569990					57160		116830	4	31107.5	34595	16659	28686	33529	1	3362.3					3362.3		446390
474	O94851	O94851	O94851	Protein-methionine sulfoxide oxidase MICAL2	MICAL2	sp|O94851|MICA2_HUMAN Protein-methionine sulfoxide oxidase MICAL2 OS=Homo sapiens (Human) GN=MICAL2 PE=1 SV=1	---	---	---	---	---	---	---	---	---	---	1	1	1.2	126.69	1124	0.0042553	2.9078				80589							1343.1	1	1343.1				1343.1	0
475	O94855	O94855	O94855	Protein transport protein Sec24D	SEC24D	sp|O94855|SC24D_HUMAN Protein transport protein Sec24D OS=Homo sapiens (Human) GN=SEC24D PE=1 SV=2	---	---	---	---	---	---	---	---	---	---	1	19	30.5	113.01	1032	0	127.37	12077000	4195200	6557000	12746000		135230	142090		126890		899490	4	232925	301920	104880	163930	318660	3	3380.7		3380.7	3552.3		3172.4		10635000
476	O94874	O94874	O94874	E3 UFM1-protein ligase 1	UFL1	sp|O94874|UFL1_HUMAN E3 UFM1-protein ligase 1 OS=Homo sapiens (Human) GN=UFL1 PE=1 SV=2	---	---	---	---	---	---	---	---	---	---	1	23	37.3	89.594	794	0	231.94	10438000	8065900	8658900	11439000	814690	1782800	1450200	654100	634630	1487400	966510	4	203155	222080	171620	184230	243390	6	24094.5	17334	37932	30855	13917	13503	31646	10963000
477	O94875	O94875	O94875	Sorbin and SH3 domain-containing protein 2	SORBS2	sp|O94875|SRBS2_HUMAN Sorbin and SH3 domain-containing protein 2 OS=Homo sapiens (Human) GN=SORBS2 PE=1 SV=3	---	---	---	---	---	---	---	---	---	---	1	7	8.2	124.11	1100	0	13.081	964650	764120	890010	818200		669070	293120				81466	4	15817	17864	14150	16482	15152	2	8909.1		12390	5428.2				750280
478	O94888	O94888	O94888	UBX domain-containing protein 7	UBXN7	sp|O94888|UBXN7_HUMAN UBX domain-containing protein 7 OS=Homo sapiens (Human) GN=UBXN7 PE=1 SV=2	---	---	---	---	---	---	---	---	---	---	1	2	6.3	54.862	489	0.00078105	4.8019	333220	164490	252560								32620	3	10981	14488	7151.7	10981		0								210810
479	O94903	O94903	O94903	Proline synthase co-transcribed bacterial homolog protein	PROSC	sp|O94903|PROSC_HUMAN Proline synthase co-transcribed bacterial homolog protein OS=Homo sapiens (Human) GN=PROSC PE=1 SV=1	---	---	---	---	---	---	---	---	---	---	1	6	25.1	30.344	275	0	76.695	4816600	2838700	3127800	2927400	584010	1129000	1185200	1102000	1358400	1440200	1464900	4	216255	344040	202760	223410	209100	6	82649	41715	80640	84658	78715	97030	102870	5621600
480	O94905;O75477	O94905;O75477	O94905	Erlin-2;Erlin-1	ERLIN2;ERLIN1	sp|O94905|ERLN2_HUMAN Erlin-2 OS=Homo sapiens (Human) GN=ERLIN2 PE=1 SV=1;sp|O75477|ERLN1_HUMAN Erlin-1 OS=Homo sapiens (Human) GN=ERLIN1 PE=1 SV=1	---	---	---	---	---	---	---	---	---	---	2	4	16.2	37.839	339	0	13.245		1324200	971830	1261800	232990						180520	3	60086		63059	46278	60086	1	11095	11095
481	O94906	O94906	O94906	Pre-mRNA-processing factor 6	PRPF6	sp|O94906|PRP6_HUMAN Pre-mRNA-processing factor 6 OS=Homo sapiens (Human) GN=PRPF6 PE=1 SV=1	---	---	---	---	---	---	---	---	---	---	1	7	11.5	106.92	941	0	52.406	1888000	537690	1457000	794080	239270	261480	285120	222930	237360	253930	110300	4	20099	33713	9601.6	26018	14180	6	4403.55	4272.6	4669.2	5091.4	3980.8	4238.6	4534.5	1210900
482	O94913	O94913	O94913	Pre-mRNA cleavage complex 2 protein Pcf11	PCF11	sp|O94913|PCF11_HUMAN Pre-mRNA cleavage complex 2 protein Pcf11 OS=Homo sapiens (Human) GN=PCF11 PE=1 SV=3	---	---	---	---	---	---	---	---	---	---	1	1	0.9	173.05	1555	0.0051558	2.784					1980100						23573	0						1	23573	23573
483	O94919	O94919	O94919	Endonuclease domain-containing 1 protein	ENDOD1	sp|O94919|ENDD1_HUMAN Endonuclease domain-containing 1 protein OS=Homo sapiens (Human) GN=ENDOD1 PE=1 SV=2	---	---	---	---	---	---	---	---	---	---	1	1	6.6	55.016	500	0	15.241	461390	400460	395950	583330			334730				90661	4	17955.5	19225	16686	16498	24305	1	13947			13947				378330
484	O94925	O94925	O94925	Glutaminase kidney isoform, mitochondrial	GLS	sp|O94925|GLSK_HUMAN Glutaminase kidney isoform, mitochondrial OS=Homo sapiens (Human) GN=GLS PE=1 SV=1	---	---	---	---	---	---	---	---	---	---	1	13	29.4	73.46	669	0	155.28	2912500	4691300	4837000	4821600	202830	202030	215740		203280	215030	522890	4	135900	83214	134040	138200	137760	5	5808.1	5795.2	5772.2	6163.9		5808.1	6143.8	4227800
485	O94929	O94929	O94929	Actin-binding LIM protein 3	ABLIM3	sp|O94929|ABLM3_HUMAN Actin-binding LIM protein 3 OS=Homo sapiens (Human) GN=ABLIM3 PE=1 SV=3	---	---	---	---	---	---	---	---	---	---	1	10	20.2	77.801	683	0	118.29	2497700	2628200	2546000	2637600	164790	381170	264130	186850	362050	633210	286090	4	60164	58087	61120	59208	61340	6	7281.2	3832.4	8864.4	6142.6	4345.3	8419.8	14726	2690600
486	O94956	O94956	O94956	Solute carrier organic anion transporter family member 2B1	SLCO2B1	sp|O94956|SO2B1_HUMAN Solute carrier organic anion transporter family member 2B1 OS=Homo sapiens (Human) GN=SLCO2B1 PE=1 SV=2	---	Membrane Transporters (SLC)	Organo Anion Transporter (OAT)	---	---	---	---	---	---	---	1	2	4.7	76.71	709	0	14.387		189450	247440	550980							47041	3	11783		9021.2	11783	26237	0
487	O94966	O94966	O94966	Ubiquitin carboxyl-terminal hydrolase 19	USP19	sp|O94966|UBP19_HUMAN Ubiquitin carboxyl-terminal hydrolase 19 OS=Homo sapiens (Human) GN=USP19 PE=1 SV=2	---	---	---	---	---	---	---	---	---	---	1	7	11.5	145.65	1318	0	34.859	779520	164050	578120	638860							35419	4	9975.2	12779	2689.4	9477.4	10473	0								696470
488	O94973	O94973	O94973	AP-2 complex subunit alpha-2	AP2A2	sp|O94973|AP2A2_HUMAN AP-2 complex subunit alpha-2 OS=Homo sapiens (Human) GN=AP2A2 PE=1 SV=2	---	---	---	---	---	---	---	---	---	---	1	15	24	103.96	939	0	76.969	3452000	2310500	4680200	2557900	164130	372470	399930	270680	458550	456830	308640	4	61325	70448	47154	95515	52202	6	7881.65	3349.6	7601.4	8161.9	5524.1	9358.1	9323	3004000
489	O94979	O94979	O94979	Protein transport protein Sec31A	SEC31A	sp|O94979|SC31A_HUMAN Protein transport protein Sec31A OS=Homo sapiens (Human) GN=SEC31A PE=1 SV=3	---	---	---	---	---	---	---	---	---	---	1	33	47.3	133.01	1220	0	323.31	35208000	14036000	25436000	30181000	4616800	4492500	3646500	3778100	3964000	4712800	2767500	4	591665	749110	298640	541180	642150	6	89962.5	98230	95585	77586	80385	84340	100270	30199000
490	O94992	O94992	O94992	Protein HEXIM1	HEXIM1	sp|O94992|HEXI1_HUMAN Protein HEXIM1 OS=Homo sapiens (Human) GN=HEXIM1 PE=1 SV=1	---	---	---	---	---	---	---	---	---	---	1	1	7	40.623	359	0.0031198	3.1948	272930		215510	249130							56737	3	19164	20995		16578	19164	0								272930
491	O95059	O95059	O95059	Ribonuclease P protein subunit p14	RPP14	sp|O95059|RPP14_HUMAN Ribonuclease P protein subunit p14 OS=Homo sapiens (Human) GN=RPP14 PE=1 SV=3	---	---	---	---	---	---	---	---	---	---	1	3	34.7	13.693	124	0	13.86	940090	340510	888520	548090							301910	4	79811.5	104450	37835	98724	60899	0								4185000
492	O95081	O95081	O95081	Arf-GAP domain and FG repeat-containing protein 2	AGFG2	sp|O95081|AGFG2_HUMAN Arf-GAP domain and FG repeat-containing protein 2 OS=Homo sapiens (Human) GN=AGFG2 PE=1 SV=2	---	---	---	---	---	---	---	---	---	---	1	5	15.2	48.962	481	0	23.404	990060	844540	570660	495960	87807	86005	97158	423360	80733	91784	251200	4	47173.5	66004	56303	38044	33064	6	5986.35	5853.8	5733.7	6477.2	28224	5382.2	6118.9	1483000
493	O95139	O95139	O95139	NADH dehydrogenase [ubiquinone] 1 beta subcomplex subunit 6	NDUFB6	sp|O95139|NDUB6_HUMAN NADH dehydrogenase [ubiquinone] 1 beta subcomplex subunit 6 OS=Homo sapiens (Human) GN=NDUFB6 PE=1 SV=3	---	---	---	---	---	---	---	---	---	---	1	3	28.1	15.489	128	0	24.05	1696100	349640	1118300	819230			10601000				1823100	4	121095	212010	43705	139790	102400	1	1325200			1325200				6327200
494	O95140	O95140	O95140	Mitofusin-2	MFN2	sp|O95140|MFN2_HUMAN Mitofusin-2 OS=Homo sapiens (Human) GN=MFN2 PE=1 SV=3	---	---	---	---	---	---	---	---	---	---	1	2	4.8	86.401	757	0.001261	4.1438	129220						453660				14217	1	3151.7	3151.7				1	11065			11065				135690
495	O95154	O95154	O95154	Aflatoxin B1 aldehyde reductase member 3	AKR7A3	sp|O95154|ARK73_HUMAN Aflatoxin B1 aldehyde reductase member 3 OS=Homo sapiens (Human) GN=AKR7A3 PE=1 SV=2	---	---	---	---	---	AKR7A	---	---	---	---	1	11	52	37.206	331	0	274.55	29034000	38222000	30757000	22588000	10782000	10213000	5107000	11700000	8057900	8564000	11668000	4	1993050	1935600	2548100	2050500	1505900	6	625905	718770	680870	340470	779980	537190	570940	42012000
496	O95155	O95155	O95155	Ubiquitin conjugation factor E4 B	UBE4B	sp|O95155|UBE4B_HUMAN Ubiquitin conjugation factor E4 B OS=Homo sapiens (Human) GN=UBE4B PE=1 SV=1	---	---	---	---	---	---	---	---	---	---	1	5	8.1	146.18	1302	0	34.536	833800		218610	482360							24361	3	7656.6	13235		3470	7656.6	0								795780
497	O95163	O95163	O95163	Elongator complex protein 1	IKBKAP	sp|O95163|ELP1_HUMAN Elongator complex protein 1 OS=Homo sapiens (Human) GN=IKBKAP PE=1 SV=3	---	---	---	---	---	---	---	---	---	---	1	10	13.9	150.25	1332	0	31.904	1708700	558310	776930	865220							62050	4	13033	27122	8862.1	12332	13734	0								1383800
498	O95164	O95164	O95164	Ubiquitin-like protein 3	UBL3	sp|O95164|UBL3_HUMAN Ubiquitin-like protein 3 OS=Homo sapiens (Human) GN=UBL3 PE=1 SV=1	---	---	---	---	---	---	---	---	---	---	1	2	31.6	13.157	117	0.0012475	3.9237	173810	74352		134730							47862	3	16841	21726	9294		16841	0
499	Q9H0R8;O95166	Q9H0R8;O95166	Q9H0R8	Gamma-aminobutyric acid receptor-associated protein-like 1;Gamma-aminobutyric acid receptor-associated protein	GABARAPL1;GABARAP	sp|Q9H0R8|GBRL1_HUMAN Gamma-aminobutyric acid receptor-associated protein-like 1 OS=Homo sapiens (Human) GN=GABARAPL1 PE=1 SV=1;sp|O95166|GBRAP_HUMAN Gamma-aminobutyric acid receptor-associated protein OS=Homo sapiens (Human) GN=GABARAP PE=1 SV=1	FOXO3	---	---	---	---	---	---	---	---	---	2	1	14.5	14.044	117	0.0014914	3.8717		387180	194010		56895			52987			230360	2	96865		129060	64670		2	18313.5	18965			17662
500	O95168	O95168	O95168	NADH dehydrogenase [ubiquinone] 1 beta subcomplex subunit 4	NDUFB4	sp|O95168|NDUB4_HUMAN NADH dehydrogenase [ubiquinone] 1 beta subcomplex subunit 4 OS=Homo sapiens (Human) GN=NDUFB4 PE=1 SV=3	---	---	---	---	---	---	---	---	---	---	1	3	31.8	15.208	129	0	41.727	1721400	689700	1346500	1674900							1086500	4	302140	344280	137940	269290	334990	0								6515300
501	O95169	O95169	O95169	NADH dehydrogenase [ubiquinone] 1 beta subcomplex subunit 8, mitochondrial	NDUFB8	sp|O95169|NDUB8_HUMAN NADH dehydrogenase [ubiquinone] 1 beta subcomplex subunit 8, mitochondrial OS=Homo sapiens (Human) GN=NDUFB8 PE=1 SV=1	---	---	---	---	---	---	---	---	---	---	1	1	10.2	21.766	186	0	11.117	271410	163070	191280	277510							112910	4	28919	33927	20384	23911	34689	0								1178700
502	O95182	O95182	O95182	NADH dehydrogenase [ubiquinone] 1 alpha subcomplex subunit 7	NDUFA7	sp|O95182|NDUA7_HUMAN NADH dehydrogenase [ubiquinone] 1 alpha subcomplex subunit 7 OS=Homo sapiens (Human) GN=NDUFA7 PE=1 SV=3	FOXO1	---	---	---	---	---	---	---	---	---	1	2	24.8	12.551	113	0	34.204	1583500	1883000		1446600		288260					743050	3	226210	226210	269000		206660	1	41180		41180					7001200
503	O95183	O95183	O95183	Vesicle-associated membrane protein 5	VAMP5	sp|O95183|VAMP5_HUMAN Vesicle-associated membrane protein 5 OS=Homo sapiens (Human) GN=VAMP5 PE=1 SV=1	---	---	---	---	---	---	---	---	---	---	1	2	17.2	12.805	116	0	26.311	395160	231410	233030	270560							188360	4	41966	65860	38569	38838	45094	0								1300800
504	O95197	O95197	O95197	Reticulon-3	RTN3	sp|O95197|RTN3_HUMAN Reticulon-3 OS=Homo sapiens (Human) GN=RTN3 PE=1 SV=2	---	---	---	---	---	---	---	---	---	---	1	2	4.8	112.61	1032	0	13.248	1730600	1855500	179130								81853	3	37621	37621	40337	3894.2		0								2584300
505	O95202	O95202	O95202	LETM1 and EF-hand domain-containing protein 1, mitochondrial	LETM1	sp|O95202|LETM1_HUMAN LETM1 and EF-hand domain-containing protein 1, mitochondrial OS=Homo sapiens (Human) GN=LETM1 PE=1 SV=1	---	---	---	---	---	---	---	---	---	---	1	15	31.7	83.353	739	0	88.079	14775000	5542500	6833200	13602000	595390	536240	538040	1052100	749740	534270	1147600	4	261995	378830	142110	175210	348780	6	14531	15266	13750	13796	26978	19224	13699	11356000
506	O95210	O95210	O95210	Starch-binding domain-containing protein 1	STBD1	sp|O95210|STBD1_HUMAN Starch-binding domain-containing protein 1 OS=Homo sapiens (Human) GN=STBD1 PE=1 SV=1	---	---	---	---	---	---	---	---	---	---	1	4	23.5	39.007	358	0	59.729	519310	1235400	327250	157660	408170	620100	478050	159470	367190	596780	187280	4	16280	19973	47515	12587	6063.7	6	17042.5	15699	23850	18386	6133.6	14123	22953	978600
507	O95218	O95218	O95218	Zinc finger Ran-binding domain-containing protein 2	ZRANB2	sp|O95218|ZRAB2_HUMAN Zinc finger Ran-binding domain-containing protein 2 OS=Homo sapiens (Human) GN=ZRANB2 PE=1 SV=2	---	---	---	---	---	---	---	---	---	---	1	3	14.8	37.404	330	0	55.047	1596500	1133200	1520800				229590	414320	448460	311610	314140	3	84491	88692	62958	84491		4	20164.5			12755	23018	24915	17311	1547800
508	O95219	O95219	O95219	Sorting nexin-4	SNX4	sp|O95219|SNX4_HUMAN Sorting nexin-4 OS=Homo sapiens (Human) GN=SNX4 PE=1 SV=1	---	---	---	---	---	---	---	---	---	---	1	7	18.7	51.908	450	0	28.003	473940	1237500	400700	357430	111160	280010	207240	124160	368430	203470	144770	4	16819.5	18228	47596	15411	13747	6	7898.3	4275.5	10770	7970.8	4775.5	14170	7825.8	471000
509	O95232	O95232	O95232	Luc7-like protein 3	LUC7L3	sp|O95232|LC7L3_HUMAN Luc7-like protein 3 OS=Homo sapiens (Human) GN=LUC7L3 PE=1 SV=2	---	---	---	---	---	---	---	---	---	---	1	4	10.9	51.466	432	0	86.261	749610	532910	1490300	570550	286690	191510	110390	412860	117650	211470	246000	4	34741	39453	28048	78438	30029	6	10604.5	15089	10079	5809.9	21729	6191.9	11130	629640
510	O95248	O95248	O95248	Myotubularin-related protein 5	SBF1	sp|O95248|MTMR5_HUMAN Myotubularin-related protein 5 OS=Homo sapiens (Human) GN=SBF1 PE=1 SV=3	---	---	---	---	---	---	---	---	---	---	1	3	2.7	208.31	1867	0	13.382	320010		571690	367660							14475	3	4226	3678.3		6571.1	4226	0								386800
511	O95249	O95249	O95249	Golgi SNAP receptor complex member 1	GOSR1	sp|O95249|GOSR1_HUMAN Golgi SNAP receptor complex member 1 OS=Homo sapiens (Human) GN=GOSR1 PE=1 SV=1	---	---	---	---	---	---	---	---	---	---	1	4	20	28.612	250	0	39.337	1980900	1399800	1473800	1730400	213790	245350	270260		230090	251890	487270	4	100130	123810	87486	92111	108150	5	15335	13362	15335	16891		14380	15743	3516800
512	O95260	O95260	O95260	Arginyl-tRNA--protein transferase 1	ATE1	sp|O95260|ATE1_HUMAN Arginyl-tRNA--protein transferase 1 OS=Homo sapiens (Human) GN=ATE1 PE=1 SV=2	---	---	---	---	---	---	---	---	---	---	1	1	3.5	59.09	518	0	9.4477		91169	90083								8631	2	4315.55		4341.4	4289.7		0
513	O95292	O95292	O95292	Vesicle-associated membrane protein-associated protein B/C	VAPB	sp|O95292|VAPB_HUMAN Vesicle-associated membrane protein-associated protein B/C OS=Homo sapiens (Human) GN=VAPB PE=1 SV=3	---	---	---	---	---	---	---	---	---	---	1	8	42.4	27.228	243	0	87.585	2662000	1784700	4340800	2652700			625620	145940			814110	4	177155	177470	118980	289390	176840	2	25718.8			41708	9729.5			6770900
514	O95295	O95295	O95295	SNARE-associated protein Snapin	SNAPIN	sp|O95295|SNAPN_HUMAN SNARE-associated protein Snapin OS=Homo sapiens (Human) GN=SNAPIN PE=1 SV=1	---	Trafficking	svf-pore (SNARE-associated)	---	---	---	---	---	---	---	1	4	53.7	14.874	136	0	64.614	1162600	2251600	1336200	1367400	262950	267250	357120	260030	335540	287910	876510	4	150200	129180	250170	148460	151940	6	30842.5	29216	29695	39680	28893	37282	31990	6201700
515	O95299	O95299	O95299	NADH dehydrogenase [ubiquinone] 1 alpha subcomplex subunit 10, mitochondrial	NDUFA10	sp|O95299|NDUAA_HUMAN NADH dehydrogenase [ubiquinone] 1 alpha subcomplex subunit 10, mitochondrial OS=Homo sapiens (Human) GN=NDUFA10 PE=1 SV=1	---	---	---	---	---	---	---	---	---	---	1	10	39.2	40.75	355	0	108.05	1798500	4546200	6225200	2972200	743360	216580	575710	991560	228600	562260	943010	4	187960	89925	227310	311260	148610	6	28449.5	37168	10829	28786	49578	11430	28113	4200800
516	O95302	O95302	O95302	Peptidyl-prolyl cis-trans isomerase FKBP9	FKBP9	sp|O95302|FKBP9_HUMAN Peptidyl-prolyl cis-trans isomerase FKBP9 OS=Homo sapiens (Human) GN=FKBP9 PE=1 SV=2	---	---	---	---	---	---	---	---	---	---	1	3	11.1	63.083	570	0	10.734	656710	722600	380570	851650							104460	4	27586	26268	28904	15223	34066	0								730880
517	O95336	O95336	O95336	6-phosphogluconolactonase	PGLS	sp|O95336|6PGL_HUMAN 6-phosphogluconolactonase OS=Homo sapiens (Human) GN=PGLS PE=1 SV=2	---	---	---	---	---	---	---	---	---	---	1	13	76	27.547	258	0	293.79	26304000	22466000	15965000	16003000	4872900	6922300	5500800	3715000	6159200	5273200	8706300	4	1479550	2023400	1728100	1228100	1231000	6	414385	374840	532480	423140	285770	473790	405630	49254000
518	O95340	O95340	O95340	Bifunctional 3-phosphoadenosine 5-phosphosulfate synthase 2;Sulfate adenylyltransferase;Adenylyl-sulfate kinase	PAPSS2	sp|O95340|PAPS2_HUMAN Bifunctional 3-phosphoadenosine 5-phosphosulfate synthase 2 OS=Homo sapiens (Human) GN=PAPSS2 PE=1 SV=2	---	---	---	---	---	---	---	---	---	---	1	21	51.1	69.5	614	0	323.31	16066000	23681000	19190000	20124000	4111100	4913400	4659800	3455500	5593900	5768300	3361300	4	614270	502050	740020	599670	628870	6	149580	128470	153540	145620	107990	174810	180260	20679000
519	O95347	O95347	O95347	Structural maintenance of chromosomes protein 2	SMC2	sp|O95347|SMC2_HUMAN Structural maintenance of chromosomes protein 2 OS=Homo sapiens (Human) GN=SMC2 PE=1 SV=2	---	---	---	---	---	---	---	---	---	---	1	2	2.8	135.65	1197	0.0042715	2.9874			1902400								29268	1	29268			29268		0
520	O95352	O95352	O95352	Ubiquitin-like modifier-activating enzyme ATG7	ATG7	sp|O95352|ATG7_HUMAN Ubiquitin-like modifier-activating enzyme ATG7 OS=Homo sapiens (Human) GN=ATG7 PE=1 SV=1	GATA4	---	---	---	---	---	---	---	---	---	1	8	19.3	77.959	703	0	78.686	934550	464730	772170	420220	229030		187690	197720	204570		89755	4	16275	24593	12230	20320	11059	4	5293.25	6027.2		4939.3	5203.1	5383.4		755350
521	O95363	O95363	O95363	Phenylalanine--tRNA ligase, mitochondrial	FARS2	sp|O95363|SYFM_HUMAN Phenylalanine--tRNA ligase, mitochondrial OS=Homo sapiens (Human) GN=FARS2 PE=1 SV=1	---	---	---	---	---	---	---	---	---	---	1	2	13.5	52.356	451	0.0007718	4.5029	360240			362310							32843	2	16421.5	16374			16469	0								492880
522	O95372	O95372	O95372	Acyl-protein thioesterase 2	LYPLA2	sp|O95372|LYPA2_HUMAN Acyl-protein thioesterase 2 OS=Homo sapiens (Human) GN=LYPLA2 PE=1 SV=1	---	---	---	---	---	---	---	---	---	---	1	7	57.6	24.737	231	0	96.489	9271400	10266000	8106200	8137300	302390		285690	231610	242820	299930	3095300	4	725365	772620	855530	675520	678110	5	23808	25199		23808	19301	20235	24994	26849000
523	O95373	O95373	O95373	Importin-7	IPO7	sp|O95373|IPO7_HUMAN Importin-7 OS=Homo sapiens (Human) GN=IPO7 PE=1 SV=1	---	---	---	---	---	---	---	---	---	---	1	24	42.9	119.52	1038	0	281.04	11165000	1561600	7518100	10825000		228070	237220	131830		385210	763150	4	218365	265840	37182	179000	257730	4	5539.2		5430.2	5648.2	3138.7		9171.6	9713500
524	O95376	O95376	O95376	E3 ubiquitin-protein ligase ARIH2	ARIH2	sp|O95376|ARI2_HUMAN E3 ubiquitin-protein ligase ARIH2 OS=Homo sapiens (Human) GN=ARIH2 PE=1 SV=1	---	---	---	---	---	---	---	---	---	---	1	1	3.4	57.818	493	0	14.321		582950	570690		192520				190800	220450	70297	2	23073		23318	22828		3	7700.9	7700.9				7632.1	8818.2
525	O95379	O95379	O95379	Tumor necrosis factor alpha-induced protein 8	TNFAIP8	sp|O95379|TFIP8_HUMAN Tumor necrosis factor alpha-induced protein 8 OS=Homo sapiens (Human) GN=TNFAIP8 PE=1 SV=1	---	---	---	---	---	---	---	---	---	---	1	3	26.8	23.003	198	0	52.976	1570000	816400	400590	1143500			175010		305210		441080	4	97995	157000	81640	40059	114350	2	24011			17501		30521		4638000
526	O95394	O95394	O95394	Phosphoacetylglucosamine mutase	PGM3	sp|O95394|AGM1_HUMAN Phosphoacetylglucosamine mutase OS=Homo sapiens (Human) GN=PGM3 PE=1 SV=1	---	---	---	---	---	---	---	---	---	---	1	10	34.3	59.851	542	0	85.061	2360000	1086800	1340100	2200900	265780	934470	1072600	368110	1546000	2086700	457290	4	61053	81380	37475	46212	75894	6	34604	9164.9	32223	36985	12693	53311	71955	2403300
527	O95396	O95396	O95396	Adenylyltransferase and sulfurtransferase MOCS3;Molybdopterin-synthase adenylyltransferase;Molybdopterin-synthase sulfurtransferase	MOCS3	sp|O95396|MOCS3_HUMAN Adenylyltransferase and sulfurtransferase MOCS3 OS=Homo sapiens (Human) GN=MOCS3 PE=1 SV=1	---	---	---	---	---	---	---	---	---	---	1	2	6.5	49.669	460	0.0010129	4.2242		140010	195850			57947	66478		63537	65411	21044	2	5997.45		5000.3	6994.6		4	2302.65		2069.6	2374.2		2269.2	2336.1
528	O95399	O95399	O95399	Urotensin-2	UTS2	sp|O95399|UTS2_HUMAN Urotensin-2 OS=Homo sapiens (Human) GN=UTS2 PE=1 SV=1	---	---	---	---	---	---	---	---	---	---	1	1	6.5	14.295	124	0	13.897		1276200	645160								274480	2	137238		182310	92165		0
529	O95406	O95406	O95406	Protein cornichon homolog 1	CNIH1	sp|O95406|CNIH1_HUMAN Protein cornichon homolog 1 OS=Homo sapiens (Human) GN=CNIH1 PE=1 SV=1	---	---	---	---	---	---	---	---	---	---	1	1	17.4	16.699	144	0	11.798	433020	368810									400910	2	200455	216510	184400			0								2075500
530	O95425	O95425	O95425	Supervillin	SVIL	sp|O95425|SVIL_HUMAN Supervillin OS=Homo sapiens (Human) GN=SVIL PE=1 SV=2	---	---	---	---	---	---	---	---	---	---	1	1	0.8	247.74	2214	0.00076065	4.2583	245310	129010		208300	71413	86217	118300	98926	94315	107950	9664.5	3	1735.8	2044.2	1075.1		1735.8	6	805.17	595.11	718.47	985.85	824.39	785.95	899.61	245310
531	O95433	O95433	O95433	Activator of 90 kDa heat shock protein ATPase homolog 1	AHSA1	sp|O95433|AHSA1_HUMAN Activator of 90 kDa heat shock protein ATPase homolog 1 OS=Homo sapiens (Human) GN=AHSA1 PE=1 SV=1	HNF4A	---	---	---	---	---	---	---	---	---	1	8	37.9	38.274	338	0	73.787	2075500	3780300	3289400	3040700		379800		447640	154520		658400	4	158255	103780	189020	164470	152040	3	18990		18990		22382	7726.2		4812500
532	O95453	O95453	O95453	Poly(A)-specific ribonuclease PARN	PARN	sp|O95453|PARN_HUMAN Poly(A)-specific ribonuclease PARN OS=Homo sapiens (Human) GN=PARN PE=1 SV=1	---	---	---	---	---	---	---	---	---	---	1	2	4.1	73.45	639	0.00076084	4.2599						104430					3600.9	0						1	3600.9		3600.9
533	O95456	O95456	O95456	Proteasome assembly chaperone 1	PSMG1	sp|O95456|PSMG1_HUMAN Proteasome assembly chaperone 1 OS=Homo sapiens (Human) GN=PSMG1 PE=1 SV=1	---	Degradation	Ubiquitin proteasome system (UPS)	---	---	---	---	---	---	---	1	4	21.9	32.854	288	0	10.794	192570	565330	786240	546660							139390	4	37066.5	12838	37689	52416	36444	0								812470
534	O95470	O95470	O95470	Sphingosine-1-phosphate lyase 1	SGPL1	sp|O95470|SGPL1_HUMAN Sphingosine-1-phosphate lyase 1 OS=Homo sapiens (Human) GN=SGPL1 PE=1 SV=3	GATA4	---	---	---	---	---	---	---	---	---	1	4	12.9	63.523	568	0	15.637	208410	427910	554300	118660					119370		52913	4	11784	7718.9	15849	20530	4394.8	1	4421.2					4421.2		539650
535	O95479	O95479	O95479	GDH/6PGL endoplasmic bifunctional protein;Glucose 1-dehydrogenase;6-phosphogluconolactonase	H6PD	sp|O95479|G6PE_HUMAN GDH/6PGL endoplasmic bifunctional protein OS=Homo sapiens (Human) GN=H6PD PE=1 SV=2	---	---	---	---	---	---	---	---	---	---	1	28	47.9	88.892	791	0	323.31	27221000	26089000	23102000	27266000	2162200	2030800	2279500	2260000	1515400	1202800	2741100	4	634640	648110	621170	550040	649180	6	49916.5	51482	48351	54273	53810	36082	28638	34320000
536	O95486	O95486	O95486	Protein transport protein Sec24A	SEC24A	sp|O95486|SC24A_HUMAN Protein transport protein Sec24A OS=Homo sapiens (Human) GN=SEC24A PE=1 SV=2	---	---	---	---	---	---	---	---	---	---	1	18	27.4	119.75	1093	0	61.39	3710300	1111500	4267100	6425600	196110	176230	190500	212480	191980	198610	450820	4	107805	100280	30040	115330	173670	6	5244.4	5300.3	4763	5148.7	5742.7	5188.5	5368	4066600
537	O95487	O95487	O95487	Protein transport protein Sec24B	SEC24B	sp|O95487|SC24B_HUMAN Protein transport protein Sec24B OS=Homo sapiens (Human) GN=SEC24B PE=1 SV=2	---	---	---	---	---	---	---	---	---	---	1	8	13.2	137.42	1268	0	54.226	1207400	731550	517620	761100				168220	132140		100510	4	21323.5	34496	20901	14789	21746	2	4290.85				4806.4	3775.3		930800
538	O95497;Q9NY84	O95497	O95497	Pantetheinase	VNN1	sp|O95497|VNN1_HUMAN Pantetheinase OS=Homo sapiens (Human) GN=VNN1 PE=1 SV=2	---	---	---	---	---	---	---	---	---	---	2	7	26.1	57.011	513	0	104.56	1225400	1519000	3182500	1919700	139710	136140	121090	132390	136380	120900	411100	4	81873.5	58351	72334	151550	91413	6	6393.45	6652.6	6482.8	5766.1	6304.1	6494.1	5757.2	2419700
539	O95562	O95562	O95562	Vesicle transport protein SFT2B	SFT2D2	sp|O95562|SFT2B_HUMAN Vesicle transport protein SFT2B OS=Homo sapiens (Human) GN=SFT2D2 PE=1 SV=1	---	Trafficking	SFT2	---	---	---	---	---	---	---	1	1	10.6	17.779	160	0	21.407	292670		276970	262910							118940	3	39567	41810		39567	37559	0								1271000
540	O95563	O95563	O95563	Mitochondrial pyruvate carrier 2	MPC2	sp|O95563|MPC2_HUMAN Mitochondrial pyruvate carrier 2 OS=Homo sapiens (Human) GN=MPC2 PE=1 SV=1	---	---	---	---	---	---	---	---	---	---	1	5	41.7	14.279	127	0	40.799	4794700	6717700	4705600	5886200							2763000	4	667560	599340	839710	588200	735780	0								20033000
541	O95571	O95571	O95571	Persulfide dioxygenase ETHE1, mitochondrial	ETHE1	sp|O95571|ETHE1_HUMAN Persulfide dioxygenase ETHE1, mitochondrial OS=Homo sapiens (Human) GN=ETHE1 PE=1 SV=2	PPARA	---	---	---	---	---	---	---	---	---	1	9	55.5	27.873	254	0	155.32	16089000	11610000	15269000	12003000	1686400	4009700	2545700	3089400	1850800	5274700	4895200	4	909050	1072600	774020	1017900	800200	6	187835	112430	267310	169710	205960	123390	351650	35381000
542	O95573	O95573	O95573	Long-chain-fatty-acid--CoA ligase 3	ACSL3	sp|O95573|ACSL3_HUMAN Long-chain-fatty-acid--CoA ligase 3 OS=Homo sapiens (Human) GN=ACSL3 PE=1 SV=3	---	---	---	---	---	---	---	---	---	---	1	11	23.3	80.419	720	0	243.75	5767300	4538400	4936800	6650900	1409300	698050	484970	1686900	1671300	721090	865600	4	162185	174770	137530	149600	201540	6	32278	42705	21153	14696	51117	50646	21851	5782900
543	O95602	O95602	O95602	DNA-directed RNA polymerase I subunit RPA1	POLR1A	sp|O95602|RPA1_HUMAN DNA-directed RNA polymerase I subunit RPA1 OS=Homo sapiens (Human) GN=POLR1A PE=1 SV=2	HNF1A	---	---	---	---	---	---	---	---	---	1	5	4.9	194.81	1720	0	12.856	1844800		220970	1145100	156470			178220			37719	3	12182	19625		2350.7	12182	2	1780.2	1664.5			1895.9			1573900
544	O95630	O95630	O95630	STAM-binding protein	STAMBP	sp|O95630|STABP_HUMAN STAM-binding protein OS=Homo sapiens (Human) GN=STAMBP PE=1 SV=1	---	---	---	---	---	---	---	---	---	---	1	1	3.5	48.076	424	0.0055905	2.6965					106710	103720	112410		113730	104530	23526	0						5	4639.4	4639.4	4509.8	4887.2		4944.7	4544.6
545	O95671	O95671	O95671	N-acetylserotonin O-methyltransferase-like protein	ASMTL	sp|O95671|ASML_HUMAN N-acetylserotonin O-methyltransferase-like protein OS=Homo sapiens (Human) GN=ASMTL PE=1 SV=3	---	---	---	---	---	---	---	---	---	---	1	2	4.5	68.856	621	0	19.785	408580	425270	472280	343730					92086	93054	65536	4	14890	14592	15188	16867	12276	2	3306.1					3288.8	3323.4	389800
546	O95674	O95674	O95674	Phosphatidate cytidylyltransferase 2	CDS2	sp|O95674|CDS2_HUMAN Phosphatidate cytidylyltransferase 2 OS=Homo sapiens (Human) GN=CDS2 PE=1 SV=1	---	---	---	---	---	---	---	---	---	---	1	3	12.8	51.417	445	0	20.198	726360	193020	835220	1042500							164540	4	45928.5	42727	11354	49130	61324	0								658780
547	O95721	O95721	O95721	Synaptosomal-associated protein 29	SNAP29	sp|O95721|SNP29_HUMAN Synaptosomal-associated protein 29 OS=Homo sapiens (Human) GN=SNAP29 PE=1 SV=1	---	---	---	---	---	---	---	---	---	---	1	4	21.3	28.97	258	0	20.683	149670	1159100	1147700		325410	99961	193560	155560	192640	161450	275780	3	88287	11513	89163	88287		6	13618.5	25031	7689.3	14889	11966	14818	12419	1942600
548	O95747	O95747	O95747	Serine/threonine-protein kinase OSR1	OXSR1	sp|O95747|OXSR1_HUMAN Serine/threonine-protein kinase OSR1 OS=Homo sapiens (Human) GN=OXSR1 PE=1 SV=1	---	---	---	---	---	---	---	---	---	---	1	7	23.7	58.022	527	0	28.238	2215100	3481700	4299600	637390							425350	4	113937	88604	139270	171980	25496	0								3445200
549	O95749	O95749	O95749	Geranylgeranyl pyrophosphate synthase	GGPS1	sp|O95749|GGPPS_HUMAN Geranylgeranyl pyrophosphate synthase OS=Homo sapiens (Human) GN=GGPS1 PE=1 SV=1	---	---	---	---	---	---	---	---	---	---	1	2	6.7	34.87	300	0.00078885	5.0407	115630	238070	571110	157860							60148	4	10998	6423.8	13226	31728	8770	0								359480
550	O95757	O95757	O95757	Heat shock 70 kDa protein 4L	HSPA4L	sp|O95757|HS74L_HUMAN Heat shock 70 kDa protein 4L OS=Homo sapiens (Human) GN=HSPA4L PE=1 SV=3	---	---	---	---	---	---	---	---	---	---	1	30	48.9	94.511	839	0	323.31	20173000	12054000	22039000	12111000	1658100	2298000	2129200	2581400	2298300	3002200	1545100	4	310420	387940	231810	423820	232900	6	44195	31886	44192	40946	49642	44198	57735	15741000
551	O95758	O95758	O95758	Polypyrimidine tract-binding protein 3	PTBP3	sp|O95758|PTBP3_HUMAN Polypyrimidine tract-binding protein 3 OS=Homo sapiens (Human) GN=PTBP3 PE=1 SV=2	---	---	---	---	---	---	---	---	---	---	1	2	5.6	59.689	552	0.0055983	2.7059		170350	171830	173580							30339	3	10108		10021	10108	10211	0
552	O95777	O95777	O95777	U6 snRNA-associated Sm-like protein LSm8	LSM8	sp|O95777|LSM8_HUMAN U6 snRNA-associated Sm-like protein LSm8 OS=Homo sapiens (Human) GN=LSM8 PE=1 SV=3	---	---	---	---	---	---	---	---	---	---	1	4	71.9	10.403	96	0	43.092	4715200	2654100	2530200	3603400	337110		363540	445760			2092700	4	446960	673590	379150	361450	514770	3	51935	48158		51935	63680			23126000
553	O95782	O95782	O95782	AP-2 complex subunit alpha-1	AP2A1	sp|O95782|AP2A1_HUMAN AP-2 complex subunit alpha-1 OS=Homo sapiens (Human) GN=AP2A1 PE=1 SV=3	HNF4A	---	---	---	---	---	---	---	---	---	1	31	49.1	107.54	977	0	173.11	12058000	17305000	22461000	13257000	1143500	252750	707790	848580	274480	257380	1293700	4	288330	227510	326520	423790	250140	6	9266.4	21576	4768.8	13354	16011	5178.8	4856.2	14829000
554	O95786	O95786	O95786	Probable ATP-dependent RNA helicase DDX58	DDX58	sp|O95786|DDX58_HUMAN Probable ATP-dependent RNA helicase DDX58 OS=Homo sapiens (Human) GN=DDX58 PE=1 SV=2	---	---	---	---	---	---	---	---	---	---	1	3	9.2	106.6	925	0	22.916	162850	401260	718590					138760	125110	126250	32800	3	7867.8	3193.1	7867.8	14090		3	2475.6				2720.9	2453.1	2475.6	357980
555	O95793	O95793	O95793	Double-stranded RNA-binding protein Staufen homolog 1	STAU1	sp|O95793|STAU1_HUMAN Double-stranded RNA-binding protein Staufen homolog 1 OS=Homo sapiens (Human) GN=STAU1 PE=1 SV=2	---	---	---	---	---	---	---	---	---	---	1	5	11.4	63.182	577	0	22.357	115260	1046900	828180	642360	340130	326670	510510	376960	457870	508020	161030	4	22977.5	3601.8	32715	25881	20074	6	13044	10629	10208	15953	11780	14308	15876	409910
556	O95810	O95810	O95810	Serum deprivation-response protein	SDPR	sp|O95810|SDPR_HUMAN Serum deprivation-response protein OS=Homo sapiens (Human) GN=SDPR PE=1 SV=3	---	---	---	---	---	---	---	---	---	---	1	4	15.1	47.173	425	0	39.763	1549400	989330	920050	479860							218810	4	53038.5	86079	54963	51114	26659	0								1110800
557	O95816	O95816	O95816	BAG family molecular chaperone regulator 2	BAG2	sp|O95816|BAG2_HUMAN BAG family molecular chaperone regulator 2 OS=Homo sapiens (Human) GN=BAG2 PE=1 SV=1	---	Degradation	Ubiquitin proteasome system (UPS)	---	---	---	---	---	---	---	1	6	51.2	23.772	211	0	48.266	2399300	1335100	1268100	1714900							479810	4	108926	171380	95363	90575	122490	0								4292600
558	O95817	O95817	O95817	BAG family molecular chaperone regulator 3	BAG3	sp|O95817|BAG3_HUMAN BAG family molecular chaperone regulator 3 OS=Homo sapiens (Human) GN=BAG3 PE=1 SV=3	---	Degradation	Ubiquitin proteasome system (UPS)	---	---	---	---	---	---	---	1	10	31.7	61.594	575	0	255.27	3570400	1253700	2723700	2828900	1164300	1281700	2220500	1192000	1462800	559660	536990	4	81656.5	105010	36873	80109	83204	6	36378	34243	37698	65310	35058	43025	16461	2904800
559	O95819;Q8N4C8	O95819;Q8N4C8	O95819	Mitogen-activated protein kinase kinase kinase kinase 4;Misshapen-like kinase 1	MAP4K4;MINK1	sp|O95819|M4K4_HUMAN Mitogen-activated protein kinase kinase kinase kinase 4 OS=Homo sapiens (Human) GN=MAP4K4 PE=1 SV=2;sp|Q8N4C8|MINK1_HUMAN Misshapen-like kinase 1 OS=Homo sapiens (Human) GN=MINK1 PE=1 SV=2	SREBF1	---	---	---	---	---	---	---	---	---	2	4	6.1	142.1	1239	0	45.727	487920	154950	610580	731900	227590						39517	4	9807.9	8712.8	2766.9	10903	13070	1	4064	4064						661930
560	O95822	O95822	O95822	Malonyl-CoA decarboxylase, mitochondrial	MLYCD	sp|O95822|DCMC_HUMAN Malonyl-CoA decarboxylase, mitochondrial OS=Homo sapiens (Human) GN=MLYCD PE=1 SV=3	PPARA	---	---	---	---	---	---	---	---	---	1	11	30	55.003	493	0	123.03	3045400	3997200	4236100	3211700	266210	152040	225830	287570	353330	145510	568600	4	128730	108760	142760	151290	114700	6	8786.25	9507.3	5430.1	8065.2	10270	12619	5196.7	4188100
561	O95825	O95825	O95825	Quinone oxidoreductase-like protein 1	CRYZL1	sp|O95825|QORL1_HUMAN Quinone oxidoreductase-like protein 1 OS=Homo sapiens (Human) GN=CRYZL1 PE=1 SV=2	---	---	---	---	---	---	---	---	---	---	1	5	27.8	38.696	349	0	23.098		436220	289650	168410	217330	314100	423930	221990	480050	485740	159860	3	15245		22959	15245	8863.6	6	19422	11439	16532	22312	11683	25266	25565
562	O95831	O95831	O95831	Apoptosis-inducing factor 1, mitochondrial	AIFM1	sp|O95831|AIFM1_HUMAN Apoptosis-inducing factor 1, mitochondrial OS=Homo sapiens (Human) GN=AIFM1 PE=1 SV=1	---	---	---	---	---	---	AIFM1	---	---	---	1	22	52.2	66.9	613	0	304.45	37851000	21102000	29668000	26865000	11261000	9713300	10451000	9114800	11986000	13205000	5845700	4	911835	1221000	680710	957040	866630	6	350205	363270	313330	337140	294030	386640	425960	38242000
563	O95832	O95832	O95832	Claudin-1	CLDN1	sp|O95832|CLD1_HUMAN Claudin-1 OS=Homo sapiens (Human) GN=CLDN1 PE=1 SV=1	GATA4	Tight junction	Claudin	CLDN1	---	---	---	---	---	---	1	2	14.7	22.744	211	0	14.09	191940	221740	233470	331850							122380	4	28450.5	23993	27717	29184	41481	0								473690
564	O95834	O95834	O95834	Echinoderm microtubule-associated protein-like 2	EML2	sp|O95834|EMAL2_HUMAN Echinoderm microtubule-associated protein-like 2 OS=Homo sapiens (Human) GN=EML2 PE=1 SV=1	---	---	---	---	---	---	---	---	---	---	1	8	24.8	70.678	649	0	20.571	641760	1240800	2240800	737260	274180	386970	879460			253950	229490	4	34105	22130	42787	77269	25423	4	11399.3	9454.6	13344	30326			8757	567750
565	O95861	O95861	O95861	3(2),5-bisphosphate nucleotidase 1	BPNT1	sp|O95861|BPNT1_HUMAN 3(2),5-bisphosphate nucleotidase 1 OS=Homo sapiens (Human) GN=BPNT1 PE=1 SV=1	---	---	---	---	---	---	---	---	---	---	1	13	63.3	33.392	308	0	167.92	5441800	2856500	4146900	3868700	547260	508110	1024500	973590	925380	495880	1039400	4	200390	272090	142820	207340	193440	6	36816	27363	25406	51225	48679	46269	24794	5566200
566	O95865	O95865	O95865	N(G),N(G)-dimethylarginine dimethylaminohydrolase 2	DDAH2	sp|O95865|DDAH2_HUMAN N(G),N(G)-dimethylarginine dimethylaminohydrolase 2 OS=Homo sapiens (Human) GN=DDAH2 PE=1 SV=1	---	---	---	---	---	---	---	---	---	---	1	6	42.8	29.644	285	0	201.53	3787400	4794800	3829800	4777400	901370	1084000	1214600	1281100	1206900	1558400	1437400	4	253155	222790	282040	225280	281030	6	71222	53022	63763	71448	75360	70996	91669	8911300
567	O95870	O95870	O95870	Abhydrolase domain-containing protein 16A	ABHD16A	sp|O95870|ABHGA_HUMAN Abhydrolase domain-containing protein 16A OS=Homo sapiens (Human) GN=ABHD16A PE=1 SV=3	---	---	---	---	---	---	---	---	---	---	1	2	7.9	63.243	558	0.0014911	3.8692	68974	90946	97848	60111							11353	4	2855.7	2463.3	3248.1	3494.6	2146.8	0
568	O95873	O95873	O95873	Uncharacterized protein C6orf47	C6orf47	sp|O95873|CF047_HUMAN Uncharacterized protein C6orf47 OS=Homo sapiens (Human) GN=C6orf47 PE=2 SV=2	---	---	---	---	---	---	---	---	---	---	1	1	7.1	31.71	294	0.0073009	2.413			76062								6338.5	1	6338.5			6338.5		0
569	O95881	O95881	O95881	Thioredoxin domain-containing protein 12	TXNDC12	sp|O95881|TXD12_HUMAN Thioredoxin domain-containing protein 12 OS=Homo sapiens (Human) GN=TXNDC12 PE=1 SV=1	---	---	---	---	---	---	---	---	---	---	1	5	36	19.206	172	0	40.006	3275000	3218100	3831100	2978000	153790	199140		135820	388670	355620	1453500	4	324655	327500	321810	383110	297800	5	19914	15379	19914		13582	38867	35562	12355000
570	O95926	O95926	O95926	Pre-mRNA-splicing factor SYF2	SYF2	sp|O95926|SYF2_HUMAN Pre-mRNA-splicing factor SYF2 OS=Homo sapiens (Human) GN=SYF2 PE=1 SV=1	---	---	---	---	---	---	---	---	---	---	1	1	11.9	28.722	243	0.0012509	3.9822									98155		10906	0						1	10906					10906
571	O95989	O95989	O95989	Diphosphoinositol polyphosphate phosphohydrolase 1	NUDT3	sp|O95989|NUDT3_HUMAN Diphosphoinositol polyphosphate phosphohydrolase 1 OS=Homo sapiens (Human) GN=NUDT3 PE=1 SV=1	---	---	---	---	---	---	---	---	---	---	1	2	19.8	19.471	172	0	35.155	1522300	871320	977550	1103400							497180	4	115610	169150	96813	108620	122600	0								5353300
572	O95994	O95994	O95994	Anterior gradient protein 2 homolog	AGR2	sp|O95994|AGR2_HUMAN Anterior gradient protein 2 homolog OS=Homo sapiens (Human) GN=AGR2 PE=1 SV=1	---	---	---	---	---	---	---	---	---	---	1	5	36.6	19.979	175	0	20.579	1087600	1412100	1414400	1364500							659810	4	173535	135950	176510	176790	170560	0								2331300
573	O96000	O96000	O96000	NADH dehydrogenase [ubiquinone] 1 beta subcomplex subunit 10	NDUFB10	sp|O96000|NDUBA_HUMAN NADH dehydrogenase [ubiquinone] 1 beta subcomplex subunit 10 OS=Homo sapiens (Human) GN=NDUFB10 PE=1 SV=3	---	---	---	---	---	---	---	---	---	---	1	6	43	20.776	172	0	93.194	2499500	2520100		4518900	451500	768820	786960	681900	825220	858610	1264700	3	229100	227230	229100		410810	6	70717.5	41045	69893	71542	61991	75020	78055	8783400
574	O96005	O96005	O96005	Cleft lip and palate transmembrane protein 1	CLPTM1	sp|O96005|CLPT1_HUMAN Cleft lip and palate transmembrane protein 1 OS=Homo sapiens (Human) GN=CLPTM1 PE=1 SV=1	---	---	---	---	---	---	---	---	---	---	1	3	9.3	76.096	669	0	106.71	365670	411870	1048100	375120							81511	4	14574	13543	15255	38820	13893	0								459750
575	O96007	O96007	O96007	Molybdopterin synthase catalytic subunit	MOCS2	sp|O96007|MOC2B_HUMAN Molybdopterin synthase catalytic subunit OS=Homo sapiens (Human) GN=MOCS2 PE=1 SV=1	---	---	---	---	---	---	---	---	---	---	1	2	20.2	20.944	188	0.00078534	4.9212	319690	222020	335280								79726	3	29063	29063	20183	30480		0								787230
576	O96008	O96008	O96008	Mitochondrial import receptor subunit TOM40 homolog	TOMM40	sp|O96008|TOM40_HUMAN Mitochondrial import receptor subunit TOM40 homolog OS=Homo sapiens (Human) GN=TOMM40 PE=1 SV=1	---	---	---	---	---	---	---	---	---	---	1	3	10.2	37.893	361	0.00079808	5.3234		752610	927300	441790							212170	3	75261		75261	92730	44179	0
577	O96011	O96011	O96011	Peroxisomal membrane protein 11B	PEX11B	sp|O96011|PX11B_HUMAN Peroxisomal membrane protein 11B OS=Homo sapiens (Human) GN=PEX11B PE=1 SV=1	---	---	---	---	---	---	---	---	---	---	1	8	39.4	28.431	259	0	54.493	3217100	2366400	3312300	4449700	119250		114460	137070			979730	4	233190	229790	169030	236590	317830	3	8517.7	8517.7		8175.8	9791			6887600
578	O96013	O96013	O96013	Serine/threonine-protein kinase PAK 4	PAK4	sp|O96013|PAK4_HUMAN Serine/threonine-protein kinase PAK 4 OS=Homo sapiens (Human) GN=PAK4 PE=1 SV=1	---	---	---	---	---	---	---	---	---	---	1	1	3	64.071	591	0.0019498	3.4525	328610	307730	437050	340370							58906	4	13937	13692	12822	18210	14182	0								385660
579	O96019	O96019	O96019	Actin-like protein 6A	ACTL6A	sp|O96019|ACL6A_HUMAN Actin-like protein 6A OS=Homo sapiens (Human) GN=ACTL6A PE=1 SV=1	---	---	---	---	---	---	---	---	---	---	1	4	17.5	47.46	429	0	46.976	834200		185760	544880	584230	537390	524130	560250	526380	652100	247470	3	27244	41710		9288	27244	6	27441.5	29212	26870	26207	28013	26319	32605	799300
580	O96033	O96033	O96033	Molybdopterin synthase sulfur carrier subunit	MOCS2	sp|O96033|MOC2A_HUMAN Molybdopterin synthase sulfur carrier subunit OS=Homo sapiens (Human) GN=MOCS2 PE=1 SV=1	---	---	---	---	---	---	---	---	---	---	1	5	69.3	9.7552	88	0	14.69	622620	380080	1319600	1959000							713560	4	161850	103770	63347	219930	326510	0								8204200
581	P00156	P00156	P00156	Cytochrome b	MT-CYB	sp|P00156|CYB_HUMAN Cytochrome b OS=Homo sapiens (Human) GN=MT-CYB PE=1 SV=2	---	---	---	---	---	---	---	---	---	---	1	1	2.4	42.717	380	0.0047192	2.8828	155700		73351								38175	2	19087.5	25950		12225		0								155700
582	P00167	P00167	P00167	Cytochrome b5	CYB5A	sp|P00167|CYB5_HUMAN Cytochrome b5 OS=Homo sapiens (Human) GN=CYB5A PE=1 SV=2	SREBF1	---	---	---	---	---	---	---	---	---	1	6	69.4	15.33	134	0	281.71	12343000	13325000	49243000	13788000	5130900	5249500	5765200	5684000	5634200	2004600	19695000	4	2259400	2057100	2220800	8207200	2298000	6	906980	855140	874920	960860	947330	939040	334100	93365000
583	P00325	P00325	P00325	Alcohol dehydrogenase 1B	ADH1B	sp|P00325|ADH1B_HUMAN Alcohol dehydrogenase 1B OS=Homo sapiens (Human) GN=ADH1B PE=1 SV=2	HNF1A	---	---	---	---	---	---	---	---	---	1	31	89.3	39.854	375	0	323.31	291370000	311680000	315780000	244750000	92795000	53188000	61170000	48692000	44047000	81379000	81308000	4	15869500	15335000	16404000	16620000	12882000	6	3009450	4884000	2799400	3219500	2562700	2318300	4283100	435230000
584	P00326	P00326	P00326	Alcohol dehydrogenase 1C	ADH1C	sp|P00326|ADH1G_HUMAN Alcohol dehydrogenase 1C OS=Homo sapiens (Human) GN=ADH1C PE=1 SV=2	SREBF1	---	---	---	---	---	---	---	---	---	1	12	55.7	39.867	375	0	82.78	7909700	12476000	7622400	8549900	572220	1770300	1878300	979980	1206900	1259300	2327600	4	433145	416300	656630	401180	449990	6	64901	30117	93176	98856	51578	63524	66278	10875000
585	P00338;P07195;Q6ZMR3;P07864	P00338	P00338	L-lactate dehydrogenase A chain	LDHA	sp|P00338|LDHA_HUMAN L-lactate dehydrogenase A chain OS=Homo sapiens (Human) GN=LDHA PE=1 SV=2	---	---	---	---	---	---	---	---	---	---	4	32	88	36.688	332	0	323.31	191270000	258200000	241050000	194130000	63364000	47735000	36044000	45604000	36886000	36833000	63951000	4	12088000	10626000	14345000	13391000	10785000	6	2291350	3520200	2652000	2002400	2533500	2049200	2046300	391220000
586	P00352	P00352	P00352	Retinal dehydrogenase 1	ALDH1A1	sp|P00352|AL1A1_HUMAN Retinal dehydrogenase 1 OS=Homo sapiens (Human) GN=ALDH1A1 PE=1 SV=2	PPARA	---	---	---	ALDH	---	---	---	---	---	1	44	86.6	54.861	501	0	323.31	357750000	408970000	461990000	269690000	89311000	94461000	112030000	74577000	85927000	98220000	85539000	4	15973500	14906000	17041000	19249000	11237000	6	3828600	3721300	3935900	4667800	3107400	3580300	4092500	573620000
587	P00367	P00367	P00367	Glutamate dehydrogenase 1, mitochondrial	GLUD1	sp|P00367|DHE3_HUMAN Glutamate dehydrogenase 1, mitochondrial OS=Homo sapiens (Human) GN=GLUD1 PE=1 SV=2	---	---	---	---	---	---	---	---	---	---	1	35	68.5	61.397	558	0	323.31	111020000	123840000	126280000	83295000	22215000	28887000	30897000	21911000	13183000	30576000	17942000	4	3558500	3364400	3752600	3826600	2524100	6	774270	673190	875350	936260	663980	399490	926550	122870000
588	P00374;Q86XF0	P00374	P00374	Dihydrofolate reductase	DHFR	sp|P00374|DYR_HUMAN Dihydrofolate reductase OS=Homo sapiens (Human) GN=DHFR PE=1 SV=2	---	---	---	---	---	---	---	---	---	---	2	3	21.9	21.452	187	0	35.621	939140	846340	500980	844990							240880	4	65051	72242	65103	38537	64999	0								2088600
589	P00387	P00387	P00387	NADH-cytochrome b5 reductase 3;NADH-cytochrome b5 reductase 3 membrane-bound form;NADH-cytochrome b5 reductase 3 soluble form	CYB5R3	sp|P00387|NB5R3_HUMAN NADH-cytochrome b5 reductase 3 OS=Homo sapiens (Human) GN=CYB5R3 PE=1 SV=3	---	---	---	---	---	---	---	---	---	---	1	11	62.8	34.234	301	0	161.79	9451300	8441600	10181000	10800000		685700	341570	560500	306430	341640	2936400	4	701145	675090	602970	727200	771410	5	24403		48978	24398	40036	21888	24403	16166000
590	P00390	P00390	P00390	Glutathione reductase, mitochondrial	GSR	sp|P00390|GSHR_HUMAN Glutathione reductase, mitochondrial OS=Homo sapiens (Human) GN=GSR PE=1 SV=2	---	---	---	---	---	GSR	---	---	---	---	1	19	65.7	56.256	522	0	323.31	45542000	58149000	50673000	61684000	3069800	7021800	8116100	8939700	10247000	8123800	11372000	4	2365700	1980100	2528200	2203200	2681900	6	353040	133470	305300	352870	388680	445530	353210	69153000
591	P00403	P00403	P00403	Cytochrome c oxidase subunit 2	MT-CO2	sp|P00403|COX2_HUMAN Cytochrome c oxidase subunit 2 OS=Homo sapiens (Human) GN=MT-CO2 PE=1 SV=1	---	---	---	---	---	---	---	---	---	---	1	7	44.9	25.565	227	0	41.883	1076400	4672800	4732500	5248100	412720	389020	429210	442630	371670	420520	2274400	4	587825	134550	584090	591560	656010	6	52077.5	51590	48628	53651	55329	46459	52565	17271000
592	P00441	P00441	P00441	Superoxide dismutase [Cu-Zn]	SOD1	sp|P00441|SODC_HUMAN Superoxide dismutase [Cu-Zn] OS=Homo sapiens (Human) GN=SOD1 PE=1 SV=2	FOXO3	---	---	---	---	SOD1	---	---	---	---	1	9	86.4	15.936	154	0	137.46	23727000	14969000	19214000	20958000	10320000	13267000	13806000	3833400	13502000	8836700	17804000	4	2510700	2965800	1871100	2401700	2619700	6	1474250	1290100	1658400	1725700	479170	1687800	1104600	86206000
593	P00450	P00450	P00450	Ceruloplasmin	CP	sp|P00450|CERU_HUMAN Ceruloplasmin OS=Homo sapiens (Human) GN=CP PE=1 SV=1	---	---	---	---	---	---	---	---	---	---	1	17	24.9	122.2	1065	0	111.36	7576900	3387300	4858300	7033800	533890	811510	942690	402060	1208400	298500	575600	4	126515	161210	72070	103370	149660	6	14312.5	11359	17266	20057	8554.4	25711	6351	7000000
594	P00480	P00480	P00480	Ornithine carbamoyltransferase, mitochondrial	OTC	sp|P00480|OTC_HUMAN Ornithine carbamoyltransferase, mitochondrial OS=Homo sapiens (Human) GN=OTC PE=1 SV=3	PPARA	---	---	---	---	---	---	---	---	---	1	10	52	39.935	354	0	169.6	5207200	5501300	5364000	7283200	2534600	2539900	3078200	2735500	2628300	1118900	2110600	4	301815	289290	305630	298000	404620	6	143565	140810	141110	171010	151970	146020	62159	7036200
595	P00491	P00491	P00491	Purine nucleoside phosphorylase	PNP	sp|P00491|PNPH_HUMAN Purine nucleoside phosphorylase OS=Homo sapiens (Human) GN=PNP PE=1 SV=2	---	---	---	---	---	---	---	---	---	---	1	14	60.9	32.118	289	0	89.998	10066000	9072100	9083300	12011000	1145400	1294700	1508300	1241200	1355300	1071500	2658200	4	531910	559190	504000	504630	667260	6	70442.5	63632	71930	83795	68955	75294	59529	21790000
596	P00492	P00492	P00492	Hypoxanthine-guanine phosphoribosyltransferase	HPRT1	sp|P00492|HPRT_HUMAN Hypoxanthine-guanine phosphoribosyltransferase OS=Homo sapiens (Human) GN=HPRT1 PE=1 SV=2	---	---	---	---	---	---	---	---	---	---	1	8	58.7	24.579	218	0	44.395	8619700	3466700	4666800	8269300				338790		134600	1961200	4	497540	663060	266670	358980	636100	2	18207.5				26061		10354	15470000
597	P00505	P00505	P00505	Aspartate aminotransferase, mitochondrial	GOT2	sp|P00505|AATM_HUMAN Aspartate aminotransferase, mitochondrial OS=Homo sapiens (Human) GN=GOT2 PE=1 SV=3	---	---	---	---	---	---	---	---	---	---	1	20	60.5	47.517	430	0	323.31	41840000	60117000	58003000	52735000	11510000	6161400	8589600	6307600	6431000	5282300	9883700	4	2129600	1609200	2312200	2230900	2028300	6	244970	442690	236980	330370	242600	247340	203160	85037000
598	P00533	P00533	P00533	Epidermal growth factor receptor	EGFR	sp|P00533|EGFR_HUMAN Epidermal growth factor receptor OS=Homo sapiens (Human) GN=EGFR PE=1 SV=2	NOTCH1	Membrane receptors	Growth factor receptor	---	---	---	---	EGFR	---	---	1	9	11.9	134.28	1210	0	63.928	1312400	479380	701400	875430	359140	443370	725640	264780	668340	632010	107700	4	13140.5	21874	7989.6	11690	14591	6	8961.25	5985.6	7389.5	12094	4413.1	11139	10533	895210
599	P00558;P07205	P00558	P00558	Phosphoglycerate kinase 1	PGK1	sp|P00558|PGK1_HUMAN Phosphoglycerate kinase 1 OS=Homo sapiens (Human) GN=PGK1 PE=1 SV=3	FOXO3	---	---	---	---	---	---	---	---	---	2	36	81.5	44.614	417	0	323.31	143890000	256150000	230320000	186400000	109000000	51758000	56031000	58423000	78090000	70637000	45952000	4	7717000	5329400	9487100	8530300	6903700	6	2390000	4037100	1917000	2075200	2163800	2892200	2616200	275170000
600	P00568;Q9Y6K8	P00568	P00568	Adenylate kinase isoenzyme 1	AK1	sp|P00568|KAD1_HUMAN Adenylate kinase isoenzyme 1 OS=Homo sapiens (Human) GN=AK1 PE=1 SV=3	---	---	---	---	---	---	---	---	---	---	2	10	56.2	21.635	194	0	145.04	18925000	11865000	17431000	18780000	1625800	1784000	514360	3517000	2010200	1207900	7060000	4	1645950	1720400	1078600	1584600	1707300	6	154990	147800	162180	46760	319730	182740	109810	52900000
601	P00734;CON__P00735	P00734	P00734	Prothrombin;Activation peptide fragment 1;Activation peptide fragment 2;Thrombin light chain;Thrombin heavy chain	F2	sp|P00734|THRB_HUMAN Prothrombin OS=Homo sapiens (Human) GN=F2 PE=1 SV=2	---	---	---	---	---	---	---	---	---	---	2	6	16.6	70.036	622	0	20.37		193440		229790	131360	320400	546240		206580	122530	53041	2	6412.6		5861.9		6963.3	5	6260.1	3980.6	9709.1	16553		6260.1	3713.1
602	P00736	P00736	P00736	Complement C1r subcomponent;Complement C1r subcomponent heavy chain;Complement C1r subcomponent light chain	C1R	sp|P00736|C1R_HUMAN Complement C1r subcomponent OS=Homo sapiens (Human) GN=C1R PE=1 SV=2	---	---	---	---	---	---	---	---	---	---	1	3	8.1	80.118	705	0	8.7943	523710	467500	543270	785570			157330		147880		70953	4	14418.5	14154	12635	14683	21232	2	4124.4			4252.2		3996.6		806110
603	P00738;P00739	P00738	P00738	Haptoglobin;Haptoglobin alpha chain;Haptoglobin beta chain	HP	sp|P00738|HPT_HUMAN Haptoglobin OS=Homo sapiens (Human) GN=HP PE=1 SV=1	---	---	---	---	---	---	---	---	---	---	2	20	58.9	45.205	406	0	323.31	52513000	45981000	48217000	49672000	18133000	17167000	18581000	21817000	26666000	21621000	14562000	4	2224750	2387000	2090100	2191700	2257800	6	913695	824210	780310	844610	991680	1212100	982780	115020000
604	P00751	P00751	P00751	Complement factor B;Complement factor B Ba fragment;Complement factor B Bb fragment	CFB	sp|P00751|CFAB_HUMAN Complement factor B OS=Homo sapiens (Human) GN=CFB PE=1 SV=2	SREBF1	---	---	---	---	---	---	---	---	---	1	8	18.3	85.532	764	0	85.415	1610700	1822800	3478400	1758500		265950	579000	674360	157840	443540	299750	4	49740.5	44742	50633	96623	48848	5	12321		7387.6	16083	18732	4384.3	12321	2212100
605	P00813	P00813	P00813	Adenosine deaminase	ADA	sp|P00813|ADA_HUMAN Adenosine deaminase OS=Homo sapiens (Human) GN=ADA PE=1 SV=3	---	---	---	---	---	---	---	---	---	---	1	3	13.5	40.764	363	0.00079597	5.2677	600870	838470	387460			171540					86884	3	26125	26125	36455	16846		1	7458.1		7458.1					684350
606	P00846	P00846	P00846	ATP synthase subunit a	MT-ATP6	sp|P00846|ATP6_HUMAN ATP synthase subunit a OS=Homo sapiens (Human) GN=MT-ATP6 PE=1 SV=1	---	---	---	---	---	---	---	---	---	---	1	1	4.4	24.817	226	0.0007839	4.892	4856900	6011200	6119600	8205300							12596000	4	3032700	2428400	3005600	3059800	4102600	0								21444000
607	P00918	P00918	P00918	Carbonic anhydrase 2	CA2	sp|P00918|CAH2_HUMAN Carbonic anhydrase 2 OS=Homo sapiens (Human) GN=CA2 PE=1 SV=2	FOXO1	---	---	---	---	---	---	---	---	---	1	10	58.5	29.246	260	0	151.96	10592000	5621400	14217000	7099300		398200	726380	712200	473280	681420	3117000	4	680440	814780	432410	1093600	546100	5	52417		30631	55876	54785	36406	52417	12884000
608	P00966	P00966	P00966	Argininosuccinate synthase	ASS1	sp|P00966|ASSY_HUMAN Argininosuccinate synthase OS=Homo sapiens (Human) GN=ASS1 PE=1 SV=2	---	---	---	---	---	---	---	---	---	---	1	30	77.7	46.53	412	0	323.31	65590000	96562000	138880000	90294000	25467000	7197100	15685000	21784000	15896000	15611000	23475000	4	4448950	3123300	4598200	6613300	4299700	6	751940	1212700	342720	746920	1037300	756960	743390	116950000
609	P00995	P00995	P00995	Pancreatic secretory trypsin inhibitor	SPINK1	sp|P00995|ISK1_HUMAN Serine protease inhibitor Kazal-type 1 OS=Homo sapiens (Human) GN=SPINK1 PE=1 SV=2	---	---	---	---	---	---	---	---	---	---	1	1	30.4	8.5067	79	0.0038159	3.069				179970							44993	1	44993				44993	0
610	P01008	P01008	P01008	Antithrombin-III	SERPINC1	sp|P01008|ANT3_HUMAN Antithrombin-III OS=Homo sapiens (Human) GN=SERPINC1 PE=1 SV=1	---	ECM	serpin	---	---	---	---	---	---	---	1	3	12.5	52.602	464	0	8.3895		549550		236420	138560	298940					45314	2	14555.1		20354		8756.3	2	8102	5132	11072
611	P01009	P01009	P01009	Alpha-1-antitrypsin;Short peptide from AAT	SERPINA1	sp|P01009|A1AT_HUMAN Alpha-1-antitrypsin OS=Homo sapiens (Human) GN=SERPINA1 PE=1 SV=3	HNF1A	ECM	serpin	---	---	---	---	---	---	---	1	15	45.9	46.736	418	0	301.59	20676000	28407000	35350000	19349000	5475300	5966700	9707200	7691000	7505500	12663000	6945000	4	1115500	939800	1291200	1606800	879490	6	345375	248880	271210	441240	349590	341160	575580	38015000
612	P01011	P01011	P01011	Alpha-1-antichymotrypsin;Alpha-1-antichymotrypsin His-Pro-less	SERPINA3	sp|P01011|AACT_HUMAN Alpha-1-antichymotrypsin OS=Homo sapiens (Human) GN=SERPINA3 PE=1 SV=2	NFE2L2	ECM	serpin	---	---	---	---	---	---	---	1	10	31.2	47.65	423	0	192.84	3578000	2943400	2252100	3472800	691070	280760	568230	555410	263260	325040	746500	4	160405	178900	147170	112600	173640	6	22011.5	34553	14038	28412	27771	13163	16252	2946700
613	P01019	P01019	P01019	Angiotensinogen;Angiotensin-1;Angiotensin-2;Angiotensin-3;Angiotensin-4;Angiotensin 1-9;Angiotensin 1-7;Angiotensin 1-5;Angiotensin 1-4	AGT	sp|P01019|ANGT_HUMAN Angiotensinogen OS=Homo sapiens (Human) GN=AGT PE=1 SV=1	---	---	---	---	---	---	---	---	---	---	1	8	24.1	53.154	485	0	122.08	6108800	5815300	7509200	5480100	219870		204690	235860	174230	193230	1297100	4	298100	305440	290760	375460	274010	5	10234	10993		10234	11793	8711.5	9661.4	5946600
614	P01023;CON__ENSEMBL:ENSBTAP00000024146;P20742	P01023	P01023	Alpha-2-macroglobulin	A2M	sp|P01023|A2MG_HUMAN Alpha-2-macroglobulin OS=Homo sapiens (Human) GN=A2M PE=1 SV=3	SREBF1	---	---	---	---	---	---	---	---	---	3	22	23.9	163.29	1474	0	185.74	7585600	2817600	4514300	5965600	451370	751820	857340		780460	821760	340910	4	72777	105360	39133	62699	82855	5	10840	6269	10442	11907		10840	11413	6095900
615	P01024	P01024	P01024	Complement C3;Complement C3 beta chain;C3-beta-c;Complement C3 alpha chain;C3a anaphylatoxin;Acylation stimulating protein;Complement C3b alpha chain;Complement C3c alpha chain fragment 1;Complement C3dg fragment;Complement C3g fragment;Complement C3d fragment;Complement C3f fragment;Complement C3c alpha chain fragment 2	C3	sp|P01024|CO3_HUMAN Complement C3 OS=Homo sapiens (Human) GN=C3 PE=1 SV=2	HNF4A	---	---	---	---	---	---	---	---	---	1	53	50.2	187.15	1663	0	323.31	29884000	15015000	23060000	36742000	1383100	1216200	1251800	1928700	1399900	1682800	1170800	4	272910	308080	154790	237740	378780	6	14345.5	14259	12538	12905	19883	14432	17349	32107000
616	P01031	P01031	P01031	Complement C5;Complement C5 beta chain;Complement C5 alpha chain;C5a anaphylatoxin;Complement C5 alpha chain	C5	sp|P01031|CO5_HUMAN Complement C5 OS=Homo sapiens (Human) GN=C5 PE=1 SV=4	HNF1A	---	---	---	---	---	---	---	---	---	1	4	5.5	188.3	1676	0	17.665	501510	153150	406840	287010			1034400	1040900			40759	4	4130.05	5970.3	1823.2	4843.3	3416.8	2	12352.5			12314	12391			353110
617	P01033	P01033	P01033	Metalloproteinase inhibitor 1	TIMP1	sp|P01033|TIMP1_HUMAN Metalloproteinase inhibitor 1 OS=Homo sapiens (Human) GN=TIMP1 PE=1 SV=1	GATA4	ECM	Proteinase-associated	---	---	---	---	---	---	---	1	2	13.5	23.171	207	0.001722	3.6463		1297900	1319300	671400							298960	3	117990		117990	119940	61037	0
618	P01034	P01034	P01034	Cystatin-C	CST3	sp|P01034|CYTC_HUMAN Cystatin-C OS=Homo sapiens (Human) GN=CST3 PE=1 SV=1	---	---	---	---	---	---	---	---	---	---	1	5	33.6	15.799	146	0	48.606	3661600	3749200	3057300	3223200						507300	2028400	4	491775	523090	535600	436760	460460	1	72472						72472	12171000
619	P01040	P01040	P01040	Cystatin-A;Cystatin-A, N-terminally processed	CSTA	sp|P01040|CYTA_HUMAN Cystatin-A OS=Homo sapiens (Human) GN=CSTA PE=1 SV=1	---	---	---	---	---	---	---	---	---	---	1	3	44.9	11.006	98	0	38.44	2565000	1931700	1705900	1805200							1144000	4	266925	366430	275960	243700	257890	0								20044000
620	P01042	P01042	P01042	Kininogen-1;Kininogen-1 heavy chain;T-kinin;Bradykinin;Lysyl-bradykinin;Kininogen-1 light chain;Low molecular weight growth-promoting factor	KNG1	sp|P01042|KNG1_HUMAN Kininogen-1 OS=Homo sapiens (Human) GN=KNG1 PE=1 SV=2	RXRA	---	---	---	---	---	---	---	---	---	1	2	3.6	71.957	644	0.0067223	2.5911							90330	27623			3370.1	0						2	1685.07			2580.9	789.23
621	P01111	P01111	P01111	GTPase NRas	NRAS	sp|P01111|RASN_HUMAN GTPase NRas OS=Homo sapiens (Human) GN=NRAS PE=1 SV=1	---	Trafficking	Ras	---	---	RAS	RAS	RAS	---	---	1	6	45	21.229	189	0	93.752	4775200	2990600	3777900	2656000	133880						1433400	4	338425	477520	299060	377790	265600	1	13388	13388						22646000
622	P01112	P01112	P01112	GTPase HRas;GTPase HRas, N-terminally processed	HRAS	sp|P01112|RASH_HUMAN GTPase HRas OS=Homo sapiens (Human) GN=HRAS PE=1 SV=1	---	Trafficking	Ras	---	---	RAS	RAS	RAS	---	---	1	2	14.3	21.298	189	0.0026532	3.2718	257900	252650	234610								74516	3	25265	25790	25265	23461		0
623	P01834	P01834	P01834	Ig kappa chain C region	IGKC	sp|P01834|IGKC_HUMAN Ig kappa chain C region OS=Homo sapiens (Human) GN=IGKC PE=1 SV=1	---	---	---	---	---	---	---	---	---	---	1	1	18.9	11.609	106	0.0026654	3.3576	88704			104290							38600	2	19300	17741			20859	0								191970
624	P02511	P02511	P02511	Alpha-crystallin B chain	CRYAB	sp|P02511|CRYAB_HUMAN Alpha-crystallin B chain OS=Homo sapiens (Human) GN=CRYAB PE=1 SV=2	RXRA	---	---	---	---	---	---	---	---	---	1	3	33.1	20.159	175	0	41.208	1131500	2626900	2967800								611470	3	238810	102860	238810	269800		0								9434600
625	P02545	P02545	P02545	Prelamin-A/C;Lamin-A/C	LMNA	sp|P02545|LMNA_HUMAN Prelamin-A/C OS=Homo sapiens (Human) GN=LMNA PE=1 SV=1	GATA4	---	---	---	---	---	---	---	---	---	1	25	46.1	74.139	664	0	294.84	22452000	18228000	17563000	24024000	6343500	5341900	3963400	5840500	2705100	4866800	2715300	4	496100	547600	444600	428360	585950	6	124495	154720	130290	96669	142450	65978	118700	40804000
626	P02647	P02647	P02647	Apolipoprotein A-I;Proapolipoprotein A-I;Truncated apolipoprotein A-I	APOA1	sp|P02647|APOA1_HUMAN Apolipoprotein A-I OS=Homo sapiens (Human) GN=APOA1 PE=1 SV=1	SREBF1	---	---	---	---	---	---	---	---	---	1	15	51.3	30.777	267	0	122.62	6667600	12372000	11530000	11149000	2180400	1087600	1255600	1826600	2853800	1286300	2900500	4	629970	370420	687330	640530	619410	6	86471	121130	60425	69758	101480	158540	71462	26770000
627	P02649;CON__Q03247	P02649	P02649	Apolipoprotein E	APOE	sp|P02649|APOE_HUMAN Apolipoprotein E OS=Homo sapiens (Human) GN=APOE PE=1 SV=1	HNF4A	---	---	---	---	---	---	---	---	---	2	15	52.7	36.154	317	0	323.31	28872000	30727000	27318000	31495000	11450000	8653500	9006800	13184000	8198100	5573700	7930800	4	1354550	1312400	1396700	1241700	1431600	6	401370	520460	393340	409400	599290	372640	253350	89031000
628	P02656	P02656	P02656	Apolipoprotein C-III	APOC3	sp|P02656|APOC3_HUMAN Apolipoprotein C-III OS=Homo sapiens (Human) GN=APOC3 PE=1 SV=1	PPARA	---	---	---	---	---	---	---	---	---	1	6	58.6	10.852	99	0	323.31	23750000	12414000	29372000	24977000	7216800	7405900	6208900	3940600	2453800	9259600	18143000	4	3480450	3392800	1773400	4196000	3568100	6	958990	1031000	1058000	886980	562940	350540	1322800	130220000
629	P02671	P02671	P02671	Fibrinogen alpha chain;Fibrinopeptide A;Fibrinogen alpha chain	FGA	sp|P02671|FIBA_HUMAN Fibrinogen alpha chain OS=Homo sapiens (Human) GN=FGA PE=1 SV=2	HNF4A	---	---	---	---	---	---	---	---	---	1	12	30	94.972	866	0	323.31	14155000	9570800	10610000	15088000	1987400	1712800	2370300	2508400	1764000	2948700	1608100	4	317495	362950	245400	272040	386870	6	55867	50958	43917	60776	64319	45232	75607	16993000
630	P02675	P02675	P02675	Fibrinogen beta chain;Fibrinopeptide B;Fibrinogen beta chain	FGB	sp|P02675|FIBB_HUMAN Fibrinogen beta chain OS=Homo sapiens (Human) GN=FGB PE=1 SV=2	HNF1A	---	---	---	---	---	---	---	---	---	1	20	57.2	55.928	491	0	323.31	5404700	6064900	7048400	5672100	677700	1017500	1962100	1578700	567580	1869700	1138000	4	209590	193030	216600	251730	202580	6	46361	24204	36339	70075	56383	20271	66774	5501400
631	P02679	P02679	P02679	Fibrinogen gamma chain	FGG	sp|P02679|FIBG_HUMAN Fibrinogen gamma chain OS=Homo sapiens (Human) GN=FGG PE=1 SV=3	RXRA	---	---	---	---	---	---	---	---	---	1	14	44.8	51.511	453	0	220.31	1039600	7736400	6293400	9523100	2198800	1839600		3662900	3713900	2862300	1388200	4	250530	37130	276300	224760	340110	5	102220	78529	65701		130820	132640	102220	6119000
633	P02743	P02743	P02743	Serum amyloid P-component;Serum amyloid P-component(1-203)	APCS	sp|P02743|SAMP_HUMAN Serum amyloid P-component OS=Homo sapiens (Human) GN=APCS PE=1 SV=2	PPARA	---	---	---	---	---	---	---	---	---	1	5	21.1	25.387	223	0	50.398	4164500	2184700	4444500	3488400	1024000	481160	749910	899460	274300	823170	1853400	4	382645	416450	218470	444450	348840	6	78654	102400	48116	74991	89946	27430	82317	9212500
634	P02749	P02749	P02749	Beta-2-glycoprotein 1	APOH	sp|P02749|APOH_HUMAN Beta-2-glycoprotein 1 OS=Homo sapiens (Human) GN=APOH PE=1 SV=3	HNF1A	---	---	---	---	---	---	---	---	---	1	6	30.7	38.298	345	0	29.077	793610	1065300	1169400	417170	717740	392050	422880	552910	546550	445940	383740	4	54675	46683	62667	68785	24539	6	29191	42220	23062	24875	32524	32150	26232	666430
635	P02751	P02751	P02751	Fibronectin;Anastellin;Ugl-Y1;Ugl-Y2;Ugl-Y3	FN1	sp|P02751|FINC_HUMAN Fibronectin OS=Homo sapiens (Human) GN=FN1 PE=1 SV=4	NFE2L2	ECM	Fibronectin	---	---	---	---	---	---	---	1	24	17.7	262.62	2386	0	323.31	5270600	3424300	4747700	6658100	2175700	816130	2301500	841730	1353700	975680	282820	4	49595.5	52184	33904	47007	65922	6	11531.6	21541	8080.5	22787	8334	13403	9660.2	6186000
636	P02753	P02753	P02753	Retinol-binding protein 4;Plasma retinol-binding protein(1-182);Plasma retinol-binding protein(1-181);Plasma retinol-binding protein(1-179);Plasma retinol-binding protein(1-176)	RBP4	sp|P02753|RET4_HUMAN Retinol-binding protein 4 OS=Homo sapiens (Human) GN=RBP4 PE=1 SV=3	---	---	---	---	---	---	---	---	---	---	1	11	64.2	23.01	201	0	323.31	60039000	48409000	30003000	29437000	9166900	16285000	9693700	12467000	14224000	17561000	24729000	4	3920600	6003900	4840900	3000300	2943700	6	1334550	916690	1628500	969370	1246700	1422400	1756100	194070000
637	P02760	P02760	P02760	Protein AMBP;Alpha-1-microglobulin;Inter-alpha-trypsin inhibitor light chain;Trypstatin	AMBP	sp|P02760|AMBP_HUMAN Protein AMBP OS=Homo sapiens (Human) GN=AMBP PE=1 SV=1	---	---	---	---	---	---	---	---	---	---	1	6	22.2	38.999	352	0	21.536	154150	213070	641450	1123800		367390		416530	636240	724830	267340	4	26704	9634.7	13317	40091	70238	4	32899		22962		26033	39765	45302
638	P02763	P02763	P02763	Alpha-1-acid glycoprotein 1	ORM1	sp|P02763|A1AG1_HUMAN Alpha-1-acid glycoprotein 1 OS=Homo sapiens (Human) GN=ORM1 PE=1 SV=1	---	---	---	---	---	---	---	---	---	---	1	7	40.3	23.511	201	0	45.273	5368100	6828500	12486000	12417000			3824600	2787200	1883800	285420	4588000	4	962275	536810	682850	1248600	1241700	4	233550			382460	278720	188380	28542	4422800
639	P02766	P02766	P02766	Transthyretin	TTR	sp|P02766|TTHY_HUMAN Transthyretin OS=Homo sapiens (Human) GN=TTR PE=1 SV=1	HNF4A	---	---	---	---	---	---	---	---	---	1	7	53.1	15.887	147	0	147.81	8574100	6654100	6623800	4262400	1267400	1234000	2352500	1442200	1715000	1387200	5918800	4	1106500	1429000	1109000	1104000	710400	6	235785	211230	205670	392080	240370	285830	231200	32084000
640	P02774;CON__Q3MHN5;CON__ENSEMBL:ENSBTAP00000018229	P02774	P02774	Vitamin D-binding protein	GC	sp|P02774|VTDB_HUMAN Vitamin D-binding protein OS=Homo sapiens (Human) GN=GC PE=1 SV=1	---	---	---	---	---	---	---	---	---	---	3	12	55.7	52.963	474	0	323.31	1734800	2144800	2642200	2894800	2421500	2649600	2180300	2258600	2404100	2943000	866920	4	85480.5	61959	76598	94363	103390	6	86171	86483	94627	77869	80663	85859	105110	2648300
641	P02786	P02786	P02786	Transferrin receptor protein 1;Transferrin receptor protein 1, serum form	TFRC	sp|P02786|TFR1_HUMAN Transferrin receptor protein 1 OS=Homo sapiens (Human) GN=TFRC PE=1 SV=2	---	Membrane receptors	(micro)nutrients	---	---	---	---	---	---	---	1	13	23.6	84.87	760	0	54.099	2106600	2860100	3138200	3088600	791230	1185100	1544900	1439800	691150	754640	451290	4	76265.5	54015	73335	80466	79196	6	25338	20288	30388	39612	36917	17722	19350	2913900
642	P02787	P02787	P02787	Serotransferrin	TF	sp|P02787|TRFE_HUMAN Serotransferrin OS=Homo sapiens (Human) GN=TF PE=1 SV=3	---	---	---	---	---	---	---	---	---	---	1	45	65.8	77.063	698	0	323.31	170140000	128800000	128830000	121020000	48602000	36925000	47484000	45562000	50510000	44422000	20056000	4	3141750	4149700	3141400	3142100	2951800	6	1134750	1185400	900610	1158200	1111300	1231900	1083500	190870000
643	P02790	P02790	P02790	Hemopexin	HPX	sp|P02790|HEMO_HUMAN Hemopexin OS=Homo sapiens (Human) GN=HPX PE=1 SV=2	PPARA	---	---	---	---	---	---	---	---	---	1	2	6.9	51.676	462	0.00053792	5.5983	294290	194370	194800	523000							52455	4	10632.4	12795	8450.8	8469.7	22739	0								299140
644	P02792	P02792	P02792	Ferritin light chain	FTL	sp|P02792|FRIL_HUMAN Ferritin light chain OS=Homo sapiens (Human) GN=FTL PE=1 SV=2	RXRA	---	---	---	---	FTL	---	---	---	---	1	7	48.6	20.019	175	0	157.89	90018000	43381000	66272000	80975000	3961000	16516000	14369000	16849000	11659000	14692000	44836000	4	9203000	11252000	5422600	8284000	10122000	6	1816300	495120	2064500	1796100	2106100	1457400	1836500	322020000
645	P02794	P02794	P02794	Ferritin heavy chain;Ferritin heavy chain, N-terminally processed	FTH1	sp|P02794|FRIH_HUMAN Ferritin heavy chain OS=Homo sapiens (Human) GN=FTH1 PE=1 SV=2	---	---	---	---	---	FTH1	---	---	---	---	1	9	58.5	21.225	183	0	130.66	20686000	17280000	16257000	12698000	3883300	1808300		1002100	1913200	1998200	7047900	4	1524400	1880600	1570900	1477900	1154400	5	173930	353030	164390		91098	173930	181660	84573000
647	P03897	P03897	P03897	NADH-ubiquinone oxidoreductase chain 3	MT-ND3	sp|P03897|NU3M_HUMAN NADH-ubiquinone oxidoreductase chain 3 OS=Homo sapiens (Human) GN=MT-ND3 PE=1 SV=1	---	---	---	---	---	---	---	---	---	---	1	1	13	13.186	115	0.0091054	2.3504		216900		179130							396030	2	198015		216900		179130	0
648	P03928	P03928	P03928	ATP synthase protein 8	MT-ATP8	sp|P03928|ATP8_HUMAN ATP synthase protein 8 OS=Homo sapiens (Human) GN=MT-ATP8 PE=1 SV=1	---	---	---	---	---	---	---	---	---	---	1	1	16.2	7.9916	68	0	54.04	4275200	5120300	5049100	5513600		699900	622390		545120	577510	7467700	4	1694900	1425100	1706800	1683000	1837900	4	199980		233300	207460		181710	192500	27801000
649	P03973	P03973	P03973	Antileukoproteinase	SLPI	sp|P03973|SLPI_HUMAN Antileukoproteinase OS=Homo sapiens (Human) GN=SLPI PE=1 SV=2	HNF1A	---	---	---	---	---	---	---	---	---	1	2	20.5	14.326	132	0	9.3471			1221400	211080	127080	115320	124440	115790	107490		252820	2	89527.5			152670	26385	5	14474	15885	14415	15555	14474	13436
650	P04004	P04004	P04004	Vitronectin;Vitronectin V65 subunit;Vitronectin V10 subunit;Somatomedin-B	VTN	sp|P04004|VTNC_HUMAN Vitronectin OS=Homo sapiens (Human) GN=VTN PE=1 SV=1	HNF1A	---	---	---	---	---	---	---	---	---	1	11	31.2	54.305	478	0	111.83	28676000	25636000	34176000	34531000	6905100	5273100	5131700	3303600	3310200	6849500	6408000	4	1309400	1194800	1068200	1424000	1438800	6	216765	287710	219710	213820	137650	137920	285390	82562000
651	P04040	P04040	P04040	Catalase	CAT	sp|P04040|CATA_HUMAN Catalase OS=Homo sapiens (Human) GN=CAT PE=1 SV=3	FOXO1	---	---	---	CAT	CAT	---	---	---	---	1	36	75.9	59.755	527	0	323.31	136140000	127080000	120300000	152510000	23250000	25915000	32023000	36041000	37138000	34786000	25006000	4	4538350	4694600	4382100	4148200	5258900	6	1151850	801720	893610	1104200	1242800	1280600	1199500	210280000
652	P04062	P04062	P04062	Glucosylceramidase	GBA	sp|P04062|GLCM_HUMAN Glucosylceramidase OS=Homo sapiens (Human) GN=GBA PE=1 SV=3	---	---	---	---	---	---	---	---	---	---	1	9	28.4	59.716	536	0	63.191	4712900	5309900	6600400	4825200	889830	722920	998290	728530	914300	1017900	989640	4	187685	174550	196660	244460	178710	6	33410	32957	26775	36974	26983	33863	37699	5708800
653	P04066	P04066	P04066	Tissue alpha-L-fucosidase	FUCA1	sp|P04066|FUCO_HUMAN Tissue alpha-L-fucosidase OS=Homo sapiens (Human) GN=FUCA1 PE=1 SV=4	---	---	---	---	---	---	---	---	---	---	1	11	40.8	53.688	466	0	141.79	4752700	9969800	12555000	7190100	155030	140410	144540	503350		132180	1545400	4	373040	206640	433470	545880	312610	5	6284.3	6740.2	6104.8	6284.3	21885		5747.1	11931000
654	P04075	P04075	P04075	Fructose-bisphosphate aldolase A	ALDOA	sp|P04075|ALDOA_HUMAN Fructose-bisphosphate aldolase A OS=Homo sapiens (Human) GN=ALDOA PE=1 SV=2	NFE2L2	---	---	---	---	---	---	---	---	---	1	25	77.7	39.42	364	0	323.31	61161000	72811000	65893000	72567000	32407000	34649000	23722000	23947000	33777000	31489000	19671000	4	3010000	2659200	3165700	2864900	3155100	6	1389050	1409000	1506500	1031400	1041200	1468600	1369100	98877000
655	P04080	P04080	P04080	Cystatin-B	CSTB	sp|P04080|CYTB_HUMAN Cystatin-B OS=Homo sapiens (Human) GN=CSTB PE=1 SV=2	---	---	---	---	---	---	---	---	---	---	1	4	65.3	11.139	98	0	113.45	12584000	16838000	1010900	15227000	672840	290450	328730	333490	311960	381270	7996400	4	2317550	2097300	2806300	168480	2537800	6	55185.5	112140	48408	54789	55582	51994	63544	52777000
656	P04083	P04083	P04083	Annexin A1	ANXA1	sp|P04083|ANXA1_HUMAN Annexin A1 OS=Homo sapiens (Human) GN=ANXA1 PE=1 SV=2	---	---	---	---	---	---	---	---	---	---	1	28	70.2	38.714	346	0	323.31	55209000	63859000	81312000	60015000	25906000	32768000	15559000	20667000	27828000	28838000	20598000	4	3096850	2760500	3192900	4065600	3000800	6	1343350	1295300	1638400	777950	1033400	1391400	1441900	95153000
657	P04114	P04114	P04114	Apolipoprotein B-100;Apolipoprotein B-48	APOB	sp|P04114|APOB_HUMAN Apolipoprotein B-100 OS=Homo sapiens (Human) GN=APOB PE=1 SV=2	SREBF1	---	---	---	---	---	---	---	---	---	1	13	4.9	515.6	4563	0	54.679	1769700	203620	737390	1631200		545970	396480	79581	358230	422750	24482	4	4718.4	7050.4	811.23	2937.8	6499	5	1579.6		2175.2	1579.6	317.06	1427.2	1684.3	1577500
658	P04150	P04150	P04150	Glucocorticoid receptor	NR3C1	sp|P04150|GCR_HUMAN Glucocorticoid receptor OS=Homo sapiens (Human) GN=NR3C1 PE=1 SV=1	---	---	---	---	---	---	---	---	---	---	1	1	2.6	85.658	777	0.0012516	3.99				126510							3085.7	1	3085.7				3085.7	0
659	P04156	P04156	P04156	Major prion protein	PRNP	sp|P04156|PRIO_HUMAN Major prion protein OS=Homo sapiens (Human) GN=PRNP PE=1 SV=1	FOXO3	---	---	---	---	---	---	---	---	---	1	1	4.7	27.661	253	0.0012466	3.9052		204460	215570	210680		130070	154670	126730	148820	162550	112800	3	17557		17038	17964	17557	5	12401		10839	12889	10561	12401	13546
660	P04179	P04179	P04179	Superoxide dismutase [Mn], mitochondrial	SOD2	sp|P04179|SODM_HUMAN Superoxide dismutase [Mn], mitochondrial OS=Homo sapiens (Human) GN=SOD2 PE=1 SV=2	FOXO3	---	---	---	---	SOD2	---	---	---	---	1	20	81.5	24.722	222	0	323.31	554650000	491550000	476000000	466560000	24504000	61714000	11516000	55524000	20581000	54714000	201570000	4	43979500	50423000	44687000	43272000	42415000	6	3600800	2227600	5610300	1046900	5047600	1871000	4974000	1371200000
662	P04406;O14556	P04406	P04406	Glyceraldehyde-3-phosphate dehydrogenase	GAPDH	sp|P04406|G3P_HUMAN Glyceraldehyde-3-phosphate dehydrogenase OS=Homo sapiens (Human) GN=GAPDH PE=1 SV=3	HNF4A	---	---	---	---	---	---	---	---	---	2	27	84.5	36.053	335	0	323.31	221520000	373620000	266890000	270020000	82413000	70711000	84430000	69369000	67049000	87130000	93715000	4	15791500	13030000	21978000	15699000	15884000	6	4503600	4847800	4159400	4966400	4080500	3944100	5125300	531220000
663	P04424	P04424	P04424	Argininosuccinate lyase	ASL	sp|P04424|ARLY_HUMAN Argininosuccinate lyase OS=Homo sapiens (Human) GN=ASL PE=1 SV=4	---	---	---	---	---	---	---	---	---	---	1	18	42.9	51.657	464	0	323.31	16324000	24325000	25906000	21040000	4253000	4520300	6300900	4785000	4649700	1769500	4744700	4	945085	680160	1013500	1079400	876670	6	191045	177210	188350	262540	199370	193740	73727	26439000
664	P04632;Q96L46	P04632	P04632	Calpain small subunit 1	CAPNS1	sp|P04632|CPNS1_HUMAN Calpain small subunit 1 OS=Homo sapiens (Human) GN=CAPNS1 PE=1 SV=1	---	Degradation	Calpain (CAPN)	---	---	---	---	---	---	---	2	15	85.8	28.315	268	0	323.31	51603000	64178000	49829000	47986000	8640800	7074800	7774500	11054000	7402900	8027200	23961000	4	4610550	4691200	5834400	4529900	4362400	6	718260	785530	643170	706770	1004900	672990	729750	146490000
666	P04792	P04792	P04792	Heat shock protein beta-1	HSPB1	sp|P04792|HSPB1_HUMAN Heat shock protein beta-1 OS=Homo sapiens (Human) GN=HSPB1 PE=1 SV=2	---	---	---	---	---	---	---	---	---	---	1	15	80	22.782	205	0	323.31	95786000	56440000	118590000	89471000	14926000	34614000	38595000	26062000	14238000	40514000	37803000	4	6616300	6841800	4031500	8470800	6390800	6	2167000	1066200	2472400	2756800	1861600	1017000	2893800	208670000
667	P04843	P04843	P04843	Dolichyl-diphosphooligosaccharide--protein glycosyltransferase subunit 1	RPN1	sp|P04843|RPN1_HUMAN Dolichyl-diphosphooligosaccharide--protein glycosyltransferase subunit 1 OS=Homo sapiens (Human) GN=RPN1 PE=1 SV=1	---	---	---	---	---	---	---	---	---	---	1	21	47	68.569	607	0	323.31	36672000	27678000	29482000	36361000	5836300	6808200	8174800	9392000	8150800	6701600	4736700	4	889775	991140	748060	796820	982730	6	202145	157740	184000	220940	253840	220290	181120	35175000
668	P04844	P04844	P04844	Dolichyl-diphosphooligosaccharide--protein glycosyltransferase subunit 2	RPN2	sp|P04844|RPN2_HUMAN Dolichyl-diphosphooligosaccharide--protein glycosyltransferase subunit 2 OS=Homo sapiens (Human) GN=RPN2 PE=1 SV=3	---	---	---	---	---	---	---	---	---	---	1	24	64.2	69.283	631	0	323.31	13833000	22742000	34776000	19785000	2738300	1492800	1693300	1112600	1742200	773770	4377800	4	924505	601440	988800	1512000	860210	6	69263.5	119060	64905	73622	48372	75747	33642	15618000
669	P04899	P04899	P04899	Guanine nucleotide-binding protein G(i) subunit alpha-2	GNAI2	sp|P04899|GNAI2_HUMAN Guanine nucleotide-binding protein G(i) subunit alpha-2 OS=Homo sapiens (Human) GN=GNAI2 PE=1 SV=3	---	---	---	---	---	---	---	---	---	---	1	18	59.2	40.45	355	0	199.98	8051600	8474700	12957000	7940500	2934400	930850	2651100	2656400	2406400	2804200	3047500	4	486065	473620	498510	762200	467090	6	156105	172610	54756	155950	156260	141550	164950	14061000
670	P04920	P04920	P04920	Anion exchange protein 2	SLC4A2	sp|P04920|B3A2_HUMAN Anion exchange protein 2 OS=Homo sapiens (Human) GN=SLC4A2 PE=1 SV=4	---	---	---	---	---	---	---	---	SLC4A2 (AE2)	---	1	1	2.5	137.01	1241	0.0010104	4.1733							100900		98161	79670	5574.7	0						3	1963.2			2018		1963.2	1593.4
671	P05023;P13637;P50993;Q13733;P20648;P54707	P05023	P05023	Sodium/potassium-transporting ATPase subunit alpha-1	ATP1A1	sp|P05023|AT1A1_HUMAN Sodium/potassium-transporting ATPase subunit alpha-1 OS=Homo sapiens (Human) GN=ATP1A1 PE=1 SV=1	NFE2L2	---	---	---	---	---	---	---	---	---	6	26	34.8	112.89	1023	0	323.31	22515000	23229000	31660000	23832000	5519200	7625400	6031200	7726100	6540700	7811600	3166400	4	522890	500340	516190	703550	529590	6	157400	122650	169450	134030	171690	145350	173590	19924000
672	P05026	P05026	P05026	Sodium/potassium-transporting ATPase subunit beta-1	ATP1B1	sp|P05026|AT1B1_HUMAN Sodium/potassium-transporting ATPase subunit beta-1 OS=Homo sapiens (Human) GN=ATP1B1 PE=1 SV=1	---	---	---	---	---	---	---	---	---	---	1	7	25.1	35.061	303	0	15.663	1950800	2344900	685170	1412000	1138100	881080	827240	200310	847450	184670	872640	4	140115	162560	195400	57097	117670	6	69779	94844	73423	68937	16693	70621	15389	1662600
673	P05062	P05062	P05062	Fructose-bisphosphate aldolase B	ALDOB	sp|P05062|ALDOB_HUMAN Fructose-bisphosphate aldolase B OS=Homo sapiens (Human) GN=ALDOB PE=1 SV=2	PPARA	---	---	---	---	---	---	---	---	---	1	19	79.4	39.473	364	0	323.31	84423000	102830000	101760000	106820000	28245000	38279000	34628000	36514000	31296000	36107000	31627000	4	5383950	4443300	5412300	5355600	5622200	6	1861450	1486600	2014700	1822500	1921800	1647200	1900400	138670000
674	P05089	P05089	P05089	Arginase-1	ARG1	sp|P05089|ARGI1_HUMAN Arginase-1 OS=Homo sapiens (Human) GN=ARG1 PE=1 SV=2	---	---	---	---	---	---	---	---	---	---	1	17	78.3	34.735	322	0	253.74	23376000	23915000	30702000	19733000	3687900	3241400	6346300	4130800	6940500	6811700	7581500	4	1390950	1375100	1406800	1806000	1160700	6	308150	216940	190670	373310	242990	408270	400690	46762000
675	P05091	P05091	P05091	Aldehyde dehydrogenase, mitochondrial	ALDH2	sp|P05091|ALDH2_HUMAN Aldehyde dehydrogenase, mitochondrial OS=Homo sapiens (Human) GN=ALDH2 PE=1 SV=2	HNF4A	---	---	---	---	---	---	---	---	---	1	32	75	56.381	517	0	323.31	155940000	172510000	180680000	124130000	25432000	36852000	36685000	42906000	34144000	49443000	37336000	4	7140200	6779900	7500500	7855700	5396900	6	1598650	1105700	1602300	1595000	1865500	1484500	2149700	219790000
676	P05109	P05109	P05109	Protein S100-A8;Protein S100-A8, N-terminally processed	S100A8	sp|P05109|S10A8_HUMAN Protein S100-A8 OS=Homo sapiens (Human) GN=S100A8 PE=1 SV=1	---	---	---	---	---	---	---	---	---	---	1	4	25.8	10.834	93	0	76.122	11467000	5992700	5240500	7617200	1020400	886950	1076100	1094000	935050	1096000	4553200	4	850620	1433400	749090	655060	952150	6	131025	127540	110870	134510	136750	116880	136990	53083000
677	P05120	P05120	P05120	Plasminogen activator inhibitor 2	SERPINB2	sp|P05120|PAI2_HUMAN Plasminogen activator inhibitor 2 OS=Homo sapiens (Human) GN=SERPINB2 PE=1 SV=2	---	ECM	serpin	---	---	---	---	---	---	---	1	1	4.1	46.596	415	0.0049296	2.8133					88234						5190.2	0						1	5190.2	5190.2
678	P05121	P05121	P05121	Plasminogen activator inhibitor 1	SERPINE1	sp|P05121|PAI1_HUMAN Plasminogen activator inhibitor 1 OS=Homo sapiens (Human) GN=SERPINE1 PE=1 SV=1	HNF1A	ECM	serpin	---	---	---	---	---	---	---	1	3	11.4	45.059	402	0	20.054	683960	1568100	1627500	1101100		91957	93628				258310	4	66729	34198	78404	81377	55054	2	4639.65		4597.9	4681.4				1078900
679	P05141	P05141	P05141	ADP/ATP translocase 2;ADP/ATP translocase 2, N-terminally processed	SLC25A5	sp|P05141|ADT2_HUMAN ADP/ATP translocase 2 OS=Homo sapiens (Human) GN=SLC25A5 PE=1 SV=7	HNF4A	---	---	---	---	---	---	---	---	---	1	19	59.4	32.852	298	0	235.22	102590000	78858000	118850000	108840000	4819800	12152000	3925200	8765800	13542000	4097200	24023000	4	5563950	5399300	4150400	6255000	5728600	6	357520	253680	639590	206590	461360	712750	215640	232420000
680	P05155;CON__P50448	P05155	P05155	Plasma protease C1 inhibitor	SERPING1	sp|P05155|IC1_HUMAN Plasma protease C1 inhibitor OS=Homo sapiens (Human) GN=SERPING1 PE=1 SV=2	HNF1A	ECM	serpin	---	---	---	---	---	---	---	2	6	14.6	55.154	500	0	35.926	2301100	640240	1523900	2432700			218810		186390	111330	322370	4	83153.5	100050	27836	66257	105770	3	8103.9			9513.4		8103.9	4840.5	2133100
681	P05156;CON__Q32PI4	P05156	P05156	Complement factor I;Complement factor I heavy chain;Complement factor I light chain	CFI	sp|P05156|CFAI_HUMAN Complement factor I OS=Homo sapiens (Human) GN=CFI PE=1 SV=2	PPARA	---	---	---	---	---	---	---	---	---	2	3	7	65.75	583	0	28.47				416520		227580	224660			217300	36202	1	13884				13884	3	7488.5		7586.1	7488.5			7243.3
682	P05161	P05161	P05161	Ubiquitin-like protein ISG15	ISG15	sp|P05161|ISG15_HUMAN Ubiquitin-like protein ISG15 OS=Homo sapiens (Human) GN=ISG15 PE=1 SV=5	---	---	---	---	---	---	---	---	---	---	1	4	37	17.887	165	0	21.215	389420	802030	158110	1695200							253730	4	49644	32452	66836	13175	141270	0								4632600
683	P05165	P05165	P05165	Propionyl-CoA carboxylase alpha chain, mitochondrial	PCCA	sp|P05165|PCCA_HUMAN Propionyl-CoA carboxylase alpha chain, mitochondrial OS=Homo sapiens (Human) GN=PCCA PE=1 SV=4	---	---	---	---	---	---	---	---	---	---	1	31	54.7	80.058	728	0	323.31	30197000	27625000	31631000	30448000	6013700	6107400	7773300	6617700	7236000	7044100	3493300	4	659190	656460	600530	687630	661920	6	148495	130730	132770	168980	143860	157300	153130	30441000
684	P05166	P05166	P05166	Propionyl-CoA carboxylase beta chain, mitochondrial	PCCB	sp|P05166|PCCB_HUMAN Propionyl-CoA carboxylase beta chain, mitochondrial OS=Homo sapiens (Human) GN=PCCB PE=1 SV=3	---	---	---	---	---	---	---	---	---	---	1	26	69.6	58.215	539	0	323.31	41811000	38766000	50314000	45472000	17481000	13409000	12573000	16357000	13131000	12802000	8737200	4	1454700	1393700	1292200	1677100	1515700	6	442330	582690	446970	419100	545230	437690	426750	68699000
685	P05181	P05181	P05181	Cytochrome P450 2E1;Cytochrome P450 2E1, N-terminally processed	CYP2E1	sp|P05181|CP2E1_HUMAN Cytochrome P450 2E1 OS=Homo sapiens (Human) GN=CYP2E1 PE=1 SV=1	HNF1A	---	---	---	---	---	---	---	---	---	1	14	41	56.848	493	0	140.26	7875000	12361000	12360000	7304900	363750	513470		329630	188580		1720700	4	421560	328120	515040	515000	304370	4	14445.5	15156	21395		13735	7857.4		16234000
686	P10696;P05187	P10696;P05187	P10696	Alkaline phosphatase, placental-like;Alkaline phosphatase, placental type	ALPPL2;ALPP	sp|P10696|PPBN_HUMAN Alkaline phosphatase, placental-like OS=Homo sapiens (Human) GN=ALPPL2 PE=2 SV=4;sp|P05187|PPB1_HUMAN Alkaline phosphatase, placental type OS=Homo sapiens (Human) GN=ALPP PE=1 SV=2	---	---	---	---	---	---	---	---	---	---	2	1	3.4	57.376	532	0	25.795					138600	151030	221120	176550	185040	197980	39642	0						6	6696.1	5133.3	5593.8	8189.6	6538.9	6853.3	7332.7
687	P05198	P05198	P05198	Eukaryotic translation initiation factor 2 subunit 1	EIF2S1	sp|P05198|IF2A_HUMAN Eukaryotic translation initiation factor 2 subunit 1 OS=Homo sapiens (Human) GN=EIF2S1 PE=1 SV=3	NFE2L2	---	---	---	---	---	---	---	---	---	1	16	54.3	36.112	315	0	323.31	8615500	9416300	13257000	10198000	2324400	3275900	3885900	2349900	3353100	2884600	2707300	4	445775	391610	428010	602600	463540	6	140015	105660	148910	176630	106810	152420	131120	12727000
688	P05362	P05362	P05362	Intercellular adhesion molecule 1	ICAM1	sp|P05362|ICAM1_HUMAN Intercellular adhesion molecule 1 OS=Homo sapiens (Human) GN=ICAM1 PE=1 SV=2	NOTCH1	---	---	---	---	---	---	---	---	---	1	9	25	57.825	532	0	82.72	4195700	2422600	3341900	4075100	475270	362920	477780	1035200	734050	1067400	727520	4	148340	167830	96906	133680	163000	6	24236.5	19011	14517	19111	41409	29362	42697	3527500
689	P05386	P05386	P05386	60S acidic ribosomal protein P1	RPLP1	sp|P05386|RLA1_HUMAN 60S acidic ribosomal protein P1 OS=Homo sapiens (Human) GN=RPLP1 PE=1 SV=1	HNF4A	---	---	---	---	---	---	---	---	---	1	4	84.2	11.514	114	0	292.92	27781000	16592000	23124000	24478000	9060500	9380000	10719000	10286000	11430000	7695200	50182000	4	7933700	9260500	5530600	7708000	8159400	6	3277700	3020200	3126700	3573000	3428700	3809900	2565100	152760000
690	P05387	P05387	P05387	60S acidic ribosomal protein P2	RPLP2	sp|P05387|RLA2_HUMAN 60S acidic ribosomal protein P2 OS=Homo sapiens (Human) GN=RPLP2 PE=1 SV=1	---	---	---	---	---	---	---	---	---	---	1	9	89.6	11.665	115	0	187.79	28727000	25493000	7195400	32861000	6456700	7129600	6813100	10349000	4999100	8972500	27799000	4	5421950	5745400	5098500	1439100	6572200	6	1394250	1291300	1425900	1362600	2069900	999820	1794500	100220000
691	P05388;Q8NHW5	P05388;Q8NHW5	P05388	60S acidic ribosomal protein P0;60S acidic ribosomal protein P0-like	RPLP0;RPLP0P6	sp|P05388|RLA0_HUMAN 60S acidic ribosomal protein P0 OS=Homo sapiens (Human) GN=RPLP0 PE=1 SV=1;sp|Q8NHW5|RLA0L_HUMAN 60S acidic ribosomal protein P0-like OS=Homo sapiens (Human) GN=RPLP0P6 PE=5 SV=1	NFE2L2	---	---	---	---	---	---	---	---	---	2	14	53	34.273	317	0	323.31	24691000	32018000	36825000	26957000	9767600	7148700	8605800	9145700	6575500	5084100	12832000	4	2268250	1899300	2462900	2832700	2073600	6	605940	751350	549900	661980	703520	505800	391090	36020000
692	P05412	P05412	P05412	Transcription factor AP-1	JUN	sp|P05412|JUN_HUMAN Transcription factor AP-1 OS=Homo sapiens (Human) GN=JUN PE=1 SV=2	---	#N/A	#N/A	c-Jun	---	c-Jun	---	c-Jun	c-Jun	---	1	1	4.5	35.675	331	0.0093013	2.2935			89824								8982.4	1	8982.4			8982.4		0
693	P05455	P05455	P05455	Lupus La protein	SSB	sp|P05455|LA_HUMAN Lupus La protein OS=Homo sapiens (Human) GN=SSB PE=1 SV=2	---	---	---	---	---	---	---	---	---	---	1	15	39	46.836	408	0	95.221	7796300	6592900	4940000	8495700	2482100	1649700	2444700	1917200	1709600	1882900	1814100	4	327030	354380	299680	224540	386170	6	86366.5	112820	74987	111120	87147	77708	85586	11157000
694	P05556	P05556	P05556	Integrin beta-1	ITGB1	sp|P05556|ITB1_HUMAN Integrin beta-1 OS=Homo sapiens (Human) GN=ITGB1 PE=1 SV=2	NOTCH1	ECM	integrin	---	---	---	---	---	---	---	1	25	41	88.414	798	0	323.31	42759000	22855000	31828000	41605000	4925600	5966500	4106300	7324900	7816700	4675600	5113600	4	1079910	1257600	672210	936120	1223700	6	160180	144870	175490	120770	215440	229900	137520	42582000
695	P05783;CON__H-INV:HIT000015463	P05783	P05783	Keratin, type I cytoskeletal 18	KRT18	sp|P05783|K1C18_HUMAN Keratin, type I cytoskeletal 18 OS=Homo sapiens (Human) GN=KRT18 PE=1 SV=2	---	---	---	---	---	---	---	---	---	---	2	17	50.2	48.057	430	0	323.31	21136000	12859000	15553000	20450000	3206700	7266900	9514200	5488600	7777000	7558700	4262000	4	692375	812940	494580	598190	786560	6	285105	123340	279490	365930	211100	299110	290720	33075000
696	P05976;P08590	P05976;P08590	P05976	Myosin light chain 1/3, skeletal muscle isoform;Myosin light chain 3	MYL1;MYL3	sp|P05976|MYL1_HUMAN Myosin light chain 1/3, skeletal muscle isoform OS=Homo sapiens (Human) GN=MYL1 PE=2 SV=3;sp|P08590|MYL3_HUMAN Myosin light chain 3 OS=Homo sapiens (Human) GN=MYL3 PE=1 SV=3	SREBF1	Cytoskeleton	Myosin	---	---	---	---	---	---	---	2	2	8.2	21.145	194	0.00027609	6.3668		732710	458720	430530		729310		594050	660400	766390	364340	3	38227		61059	38227	35877	4	57905		60776		49504	55034	63866
697	P06132	P06132	P06132	Uroporphyrinogen decarboxylase	UROD	sp|P06132|DCUP_HUMAN Uroporphyrinogen decarboxylase OS=Homo sapiens (Human) GN=UROD PE=1 SV=2	---	---	---	---	---	---	---	---	---	---	1	13	61.6	40.786	367	0	289.63	8832200	12046000	10680000	11269000	2066400	2756500	1547300	2339400	1744000	1588300	3429300	4	685910	552010	752850	667500	704320	6	119075	129150	172280	96706	146210	109000	99270	12974000
698	P06133	P06133	P06133	UDP-glucuronosyltransferase 2B4	UGT2B4	sp|P06133|UD2B4_HUMAN UDP-glucuronosyltransferase 2B4 OS=Homo sapiens (Human) GN=UGT2B4 PE=1 SV=2	---	---	---	---	UGTs	UGTs	---	---	UGT2B4	---	1	16	47.7	60.512	528	0	323.31	34426000	37898000	37658000	30523000	6339600	9363100	7938100	7056400	4547100	7738900	7339600	4	1441700	1377100	1515900	1506300	1220900	6	295910	253580	374520	317520	282260	181890	309560	54858000
699	P06280	P06280	P06280	Alpha-galactosidase A	GLA	sp|P06280|AGAL_HUMAN Alpha-galactosidase A OS=Homo sapiens (Human) GN=GLA PE=1 SV=1	---	---	---	---	---	---	---	---	---	---	1	5	18.4	48.766	429	0	15.751	610420	521730	287410	753410		290120					91226	4	20965.5	22608	19323	10645	27904	1	10745		10745					738730
700	P06396	P06396	P06396	Gelsolin	GSN	sp|P06396|GELS_HUMAN Gelsolin OS=Homo sapiens (Human) GN=GSN PE=1 SV=1	HNF4A	---	---	---	---	---	---	---	---	---	1	24	47.1	85.696	782	0	323.31	26753000	27274000	26122000	22544000	9973500	11666000	13160000	12809000	9601900	9171200	4972800	4	777580	786850	802180	768310	663060	6	318225	293340	343110	387060	376740	282410	269740	31206000
701	P06400	P06400	P06400	Retinoblastoma-associated protein	RB1	sp|P06400|RB_HUMAN Retinoblastoma-associated protein OS=Homo sapiens (Human) GN=RB1 PE=1 SV=2	FOXO3	---	---	---	---	---	---	---	---	---	1	2	4.5	106.16	928	0	13.999	148400	259240	569870	114400							21838	4	4076.4	2968	5184.8	11397	2287.9	0								238280
702	P06454	P06454	P06454	Prothymosin alpha;Prothymosin alpha, N-terminally processed;Thymosin alpha-1	PTMA	sp|P06454|PTMA_HUMAN Prothymosin alpha OS=Homo sapiens (Human) GN=PTMA PE=1 SV=2	---	---	---	---	---	---	---	---	---	---	1	3	17.1	12.203	111	0	224.14			2739400	3128600	2042100	2353800	2757800	2446700	2198200	2389600	6685400	2	978020			913140	1042900	6	790570	680710	784600	919280	815570	732730	796540
703	P06493	P06493	P06493	Cyclin-dependent kinase 1	CDK1	sp|P06493|CDK1_HUMAN Cyclin-dependent kinase 1 OS=Homo sapiens (Human) GN=CDK1 PE=1 SV=3	HNF4A	---	---	---	---	---	---	---	---	---	1	2	12.1	34.095	297	0.0033589	3.189		247310	47516								15517	2	7758.45		13016	2500.9		0
704	P06576	P06576	P06576	ATP synthase subunit beta, mitochondrial	ATP5B	sp|P06576|ATPB_HUMAN ATP synthase subunit beta, mitochondrial OS=Homo sapiens (Human) GN=ATP5B PE=1 SV=3	FOXO1	---	---	---	---	---	---	---	---	---	1	37	81.1	56.559	529	0	323.31	257720000	323960000	372240000	312430000	101120000	131290000	115500000	120750000	109300000	140440000	68440000	4	10972500	8887000	11171000	12836000	10774000	6	4073250	3487100	4527200	3982800	4163700	3769000	4842600	477220000
705	P06702	P06702	P06702	Protein S100-A9	S100A9	sp|P06702|S10A9_HUMAN Protein S100-A9 OS=Homo sapiens (Human) GN=S100A9 PE=1 SV=1	HNF4A	---	---	---	---	---	---	---	---	---	1	4	49.1	13.242	114	0	29.411	1600600	549240	1524800	168630		1738000	1905300	1662300	1877000	266740	1411600	4	129628	200070	68655	190600	21079	5	217250		217250	238160	207790	234620	33343	6332100
706	P06730;A6NMX2	P06730	P06730	Eukaryotic translation initiation factor 4E	EIF4E	sp|P06730|IF4E_HUMAN Eukaryotic translation initiation factor 4E OS=Homo sapiens (Human) GN=EIF4E PE=1 SV=2	---	---	---	---	---	---	---	---	---	---	2	8	55.3	25.097	217	0	38.306	3897100	384810	6900500	3183800	486240	462170	867550	262030	997620	125320	1597000	4	321865	354290	34983	627320	289440	6	43110	44204	42016	78868	23820	90693	11392	8929600
707	P06733	P06733	P06733	Alpha-enolase	ENO1	sp|P06733|ENOA_HUMAN Alpha-enolase OS=Homo sapiens (Human) GN=ENO1 PE=1 SV=2	NOTCH1	---	---	---	---	---	---	---	---	---	1	40	84.3	47.168	434	0	323.31	537520000	633660000	593720000	595240000	120500000	178590000	150250000	121050000	186500000	217950000	151590000	4	27022000	24433000	28803000	26987000	27057000	6	7473450	5477300	8117500	6829400	5502300	8477400	9906700	1072200000
708	P06737	P06737	P06737	Glycogen phosphorylase, liver form	PYGL	sp|P06737|PYGL_HUMAN Glycogen phosphorylase, liver form OS=Homo sapiens (Human) GN=PYGL PE=1 SV=4	---	---	---	---	---	---	---	---	---	PYG	1	31	47.5	97.147	847	0	323.31	39332000	27130000	45398000	40200000	3467100	3856100	2318700	3932400	3549000	3199400	3380100	4	779725	771210	531960	890160	788240	6	68785.5	67982	75610	45464	77106	69589	62733	38989000
709	P06744	P06744	P06744	Glucose-6-phosphate isomerase	GPI	sp|P06744|G6PI_HUMAN Glucose-6-phosphate isomerase OS=Homo sapiens (Human) GN=GPI PE=1 SV=4	FOXO1	---	---	---	---	---	---	---	---	---	1	29	70.6	63.146	558	0	323.31	100810000	157360000	164260000	95523000	30065000	23074000	28350000	23905000	26454000	21968000	25837000	4	4964650	3877200	6052100	6317600	3674000	6	968415	1156300	887450	1090400	919430	1017400	844910	161990000
710	P06748	P06748	P06748	Nucleophosmin	NPM1	sp|P06748|NPM_HUMAN Nucleophosmin OS=Homo sapiens (Human) GN=NPM1 PE=1 SV=2	---	---	---	---	---	---	---	---	---	---	1	10	42.9	32.575	294	0	323.31	59675000	68037000	53628000	55226000	26900000	15739000	32990000	18714000	18215000	20835000	30830000	4	4787500	4972900	5669700	4469000	4602100	6	1647900	2241700	1311600	2749100	1559500	1517900	1736300	147130000
711	P06753	P06753	P06753	Tropomyosin alpha-3 chain	TPM3	sp|P06753|TPM3_HUMAN Tropomyosin alpha-3 chain OS=Homo sapiens (Human) GN=TPM3 PE=1 SV=2	---	Cytoskeleton	tropomyosin	---	---	---	---	---	---	---	1	5	11.9	32.95	285	0	56.143	3833800	3766500	2655600	6334900	4125300	3495900	4807700	4614000	3919600	4684800	2639900	4	237510	239620	235400	165980	395930	6	273105	257830	218500	300480	288380	244980	292800	5853500
712	P06756	P06756	P06756	Integrin alpha-V;Integrin alpha-V heavy chain;Integrin alpha-V light chain	ITGAV	sp|P06756|ITAV_HUMAN Integrin alpha-V OS=Homo sapiens (Human) GN=ITGAV PE=1 SV=2	FOXO1	ECM	integrin	---	---	---	---	---	---	---	1	13	21.8	116.04	1048	0	66.304	4682900	1816500	3424500	6112200	292100	279340	525330	282310	408200	575230	317220	4	69891	80739	31319	59043	105380	6	6037.05	5036.2	4816.3	9057.4	4867.4	7037.9	9917.8	4694200
713	P06865	P06865	P06865	Beta-hexosaminidase subunit alpha	HEXA	sp|P06865|HEXA_HUMAN Beta-hexosaminidase subunit alpha OS=Homo sapiens (Human) GN=HEXA PE=1 SV=2	---	---	---	---	---	---	---	---	---	---	1	18	46.5	60.702	529	0	153.48	11077000	11762000	13776000	10082000	1881800	2048600	993000	1414000	381450	2200900	2224700	4	456790	443080	470500	551050	403290	6	65915	75271	81944	39720	56559	15258	88036	15263000
714	Q16778;P33778;P23527;P06899;Q8N257;Q96A08	Q16778;P33778;P23527;P06899;Q8N257;Q96A08	Q16778	Histone H2B type 2-E;Histone H2B type 1-B;Histone H2B type 1-O;Histone H2B type 1-J;Histone H2B type 3-B;Histone H2B type 1-A	HIST2H2BE;HIST1H2BB;HIST1H2BO;HIST1H2BJ;HIST3H2BB;HIST1H2BA	sp|Q16778|H2B2E_HUMAN Histone H2B type 2-E OS=Homo sapiens (Human) GN=HIST2H2BE PE=1 SV=3;sp|P33778|H2B1B_HUMAN Histone H2B type 1-B OS=Homo sapiens (Human) GN=HIST1H2BB PE=1 SV=2;sp|P23527|H2B1O_HUMAN Histone H2B type 1-O OS=Homo sapiens (Human) GN=HIS	---	---	---	---	---	---	---	---	---	---	6	2	7.9	13.92	126	0.0007726	4.5387	4475000	166660	150630	154420							706670	4	22935	639280	23809	21518	22061	0
715	P07093	P07093	P07093	Glia-derived nexin	SERPINE2	sp|P07093|GDN_HUMAN Glia-derived nexin OS=Homo sapiens (Human) GN=SERPINE2 PE=1 SV=1	---	ECM	serpin	---	---	---	---	---	---	---	1	2	7	44.002	398	0	16.186	271250		271730								24681	2	12340	12329		12351		0								2162100
716	P07099	P07099	P07099	Epoxide hydrolase 1	EPHX1	sp|P07099|HYEP_HUMAN Epoxide hydrolase 1 OS=Homo sapiens (Human) GN=EPHX1 PE=1 SV=1	GATA4	---	---	---	---	EPHX1	---	---	EPHX1	---	1	28	74.9	52.948	455	0	323.31	176150000	211260000	209610000	171730000	22054000	11705000	13625000	19545000	15507000	18434000	33447000	4	7418400	6774900	8125300	8061900	6605100	6	652700	848240	450200	524050	751720	596400	709000	308570000
717	P07108	P07108	P07108	Acyl-CoA-binding protein	DBI	sp|P07108|ACBP_HUMAN Acyl-CoA-binding protein OS=Homo sapiens (Human) GN=DBI PE=1 SV=2	PPARA	---	---	---	---	---	---	---	---	---	1	5	77	10.044	87	0	153.27	1481200	5433900	29461000	13299000	4219900	4306200	4927300	6422500	4492700	5373400	15884000	4	1873350	296230	1086800	5892200	2659900	6	942005	843990	861230	985460	1284500	898550	1074700	50827000
718	P07148	P07148	P07148	Fatty acid-binding protein, liver	FABP1	sp|P07148|FABPL_HUMAN Fatty acid-binding protein, liver OS=Homo sapiens (Human) GN=FABP1 PE=1 SV=1	HNF4A	---	---	---	---	---	---	---	---	---	1	10	77.2	14.208	127	0	323.31	84044000	74993000	83082000	64792000	8487500	4912900	8848700	22149000	5909500	8842600	52294000	4	11291000	12006000	10713000	11869000	9256000	6	1237850	1212500	701850	1264100	3164100	844220	1263200	451060000
719	P07199	P07199	P07199	Major centromere autoantigen B	CENPB	sp|P07199|CENPB_HUMAN Major centromere autoantigen B OS=Homo sapiens (Human) GN=CENPB PE=1 SV=2	---	---	---	---	---	---	---	---	---	---	1	2	4.5	65.171	599	0	6.9569	314080	90200	234720	340570							48978	4	13720	15704	4510	11736	17028	0								280940
720	P07203	P07203	P07203	Glutathione peroxidase 1	GPX1	sp|P07203|GPX1_HUMAN Glutathione peroxidase 1 OS=Homo sapiens (Human) GN=GPX1 PE=1 SV=4	FOXO3	---	---	---	---	---	---	---	---	---	1	11	70.9	22.088	203	0	50.479	5516100	2472400	2129600	6635800	1263900	1187400	1100800	439170	1042300	1171200	1766100	4	307250	424320	190180	163820	510440	6	87385.5	97223	91340	84676	33782	80175	90095	15542000
721	P07225	P07225	P07225	Vitamin K-dependent protein S	PROS1	sp|P07225|PROS_HUMAN Vitamin K-dependent protein S OS=Homo sapiens (Human) GN=PROS1 PE=1 SV=1	---	---	---	---	---	---	---	---	---	---	1	3	5.9	75.122	676	0	7.1634	164200	422260		322860				150360			32111	3	9783.5	4975.8	12796		9783.5	1	4556.3				4556.3			300040
722	P07237	P07237	P07237	Protein disulfide-isomerase	P4HB	sp|P07237|PDIA1_HUMAN Protein disulfide-isomerase OS=Homo sapiens (Human) GN=P4HB PE=1 SV=3	---	---	---	---	---	---	---	---	---	---	1	38	73.8	57.116	508	0	323.31	185490000	163890000	215190000	193930000	35394000	56135000	52000000	43771000	34891000	62218000	29797000	4	5420250	5299700	4682600	6148300	5540800	6	1368150	1011200	1603900	1485700	1250600	996880	1777700	212860000
723	P07305	P07305	P07305	Histone H1.0;Histone H1.0, N-terminally processed	H1F0	sp|P07305|H10_HUMAN Histone H1.0 OS=Homo sapiens (Human) GN=H1F0 PE=1 SV=3	---	---	---	---	---	---	---	---	---	---	1	2	10.8	20.863	194	0	14.542	5496500	4686000	2106000	4626000							3382900	4	931200	1099300	937190	421190	925210	0								12474000
724	P07306	P07306	P07306	Asialoglycoprotein receptor 1	ASGR1	sp|P07306|ASGR1_HUMAN Asialoglycoprotein receptor 1 OS=Homo sapiens (Human) GN=ASGR1 PE=1 SV=2	HNF1A	Membrane receptors	(micro)nutrients	---	---	---	---	---	---	---	1	2	8.2	33.186	291	0.0071085	2.4578		524670								231700	42021	1	29149		29149			1	12872						12872
725	P07311	P07311	P07311	Acylphosphatase-1	ACYP1	sp|P07311|ACYP1_HUMAN Acylphosphatase-1 OS=Homo sapiens (Human) GN=ACYP1 PE=1 SV=2	---	---	---	---	---	---	---	---	---	---	1	1	13.1	11.261	99	0	9.3967		657940	751720	952940							295330	3	93965		82243	93965	119120	0
726	P07327	P07327	P07327	Alcohol dehydrogenase 1A	ADH1A	sp|P07327|ADH1A_HUMAN Alcohol dehydrogenase 1A OS=Homo sapiens (Human) GN=ADH1A PE=1 SV=2	RXRA	---	---	---	---	---	---	---	---	---	1	6	29.1	39.858	375	0	225.25	10943000	24258000	15734000	16608000	2835700	2314200	1759900	2190600	3162000	293430	4711700	4	951250	643680	1426900	925530	976970	6	132495	166800	136130	103520	128860	186000	17261	15631000
727	P07339	P07339	P07339	Cathepsin D;Cathepsin D light chain;Cathepsin D heavy chain	CTSD	sp|P07339|CATD_HUMAN Cathepsin D OS=Homo sapiens (Human) GN=CTSD PE=1 SV=1	---	Degradation	Cathepsin	---	---	---	---	---	---	---	1	21	58.7	44.552	412	0	323.31	159480000	166600000	190590000	172150000	44546000	47985000	45214000	53405000	40233000	57152000	51440000	4	8914650	8393700	8768500	10031000	9060800	6	2452600	2344500	2525500	2379700	2810800	2117500	3008000	310690000
728	P07355;A6NMY6	P07355;A6NMY6	P07355	Annexin A2;Putative annexin A2-like protein	ANXA2;ANXA2P2	sp|P07355|ANXA2_HUMAN Annexin A2 OS=Homo sapiens (Human) GN=ANXA2 PE=1 SV=2;sp|A6NMY6|AXA2L_HUMAN Putative annexin A2-like protein OS=Homo sapiens (Human) GN=ANXA2P2 PE=5 SV=2	HNF1A	---	---	---	---	---	---	---	---	---	2	41	80.8	38.604	339	0	323.31	561420000	557230000	637140000	412720000	123920000	141750000	200040000	197540000	133820000	226400000	138780000	4	24318500	24410000	24227000	27702000	17944000	6	7376050	5388000	6163200	8697300	8588900	5818100	9843600	935050000
729	P07384	P07384	P07384	Calpain-1 catalytic subunit	CAPN1	sp|P07384|CAN1_HUMAN Calpain-1 catalytic subunit OS=Homo sapiens (Human) GN=CAPN1 PE=1 SV=1	---	Degradation	Calpain (CAPN)	---	---	---	---	---	---	---	1	36	67.9	81.889	714	0	323.31	25309000	18719000	26744000	26287000	5094900	5352500	4857300	7710600	3977000	4504300	3571000	4	716615	703020	519960	742890	730210	6	138230	141530	148680	134930	214180	110470	125120	25604000
730	P07437	P07437	P07437	Tubulin beta chain	TUBB	sp|P07437|TBB5_HUMAN Tubulin beta chain OS=Homo sapiens (Human) GN=TUBB PE=1 SV=2	---	Cytoskeleton	tubulin	---	---	---	---	---	---	---	1	7	17.1	49.67	444	0	323.31	80636000	78070000	76590000	54803000	26167000	18887000	27331000	23947000	20746000	22134000	21466000	4	3866500	4031800	3903500	3829500	2740200	6	1152050	1308400	944360	1366600	1197400	1037300	1106700	140390000
731	P07602	P07602	P07602	Prosaposin;Saposin-A;Saposin-B-Val;Saposin-B;Saposin-C;Saposin-D	PSAP	sp|P07602|SAP_HUMAN Prosaposin OS=Homo sapiens (Human) GN=PSAP PE=1 SV=2	---	---	---	---	---	---	---	---	---	---	1	12	33.4	58.112	524	0	210.71	7603200	8903900	8081800	14224000	2806200	3690100	6787400	6755800	7087400	7285800	2362100	4	273960	245260	287220	260700	458850	6	218440	90523	119030	218950	217930	228620	235020	59482000
732	P07686	P07686	P07686	Beta-hexosaminidase subunit beta;Beta-hexosaminidase subunit beta chain B;Beta-hexosaminidase subunit beta chain A	HEXB	sp|P07686|HEXB_HUMAN Beta-hexosaminidase subunit beta OS=Homo sapiens (Human) GN=HEXB PE=1 SV=3	---	---	---	---	---	---	---	---	---	---	1	20	45	63.111	556	0	323.31	36254000	45523000	36042000	46526000	3203700	4659200	3589700	4038600	4445200	1851700	6418400	4	1410000	1250200	1569800	1242800	1604300	6	131520	110470	160660	123780	139260	153280	63853	106610000
733	P07711	P07711	P07711	Cathepsin L1;Cathepsin L1 heavy chain;Cathepsin L1 light chain	CTSL	sp|P07711|CATL1_HUMAN Cathepsin L1 OS=Homo sapiens (Human) GN=CTSL PE=1 SV=2	RXRA	Degradation	Cathepsin	---	---	---	---	---	---	---	1	8	36.3	37.564	333	0	170.32	4380100	5706800	2517700	2835200	698080	1067500	965050	3175700	951130	3604500	2354700	4	327965	398190	518800	228880	257740	6	92388.5	63462	97045	87732	288700	86466	327690	13430000
734	P07737	P07737	P07737	Profilin-1	PFN1	sp|P07737|PROF1_HUMAN Profilin-1 OS=Homo sapiens (Human) GN=PFN1 PE=1 SV=2	---	---	---	---	---	---	---	---	---	---	1	16	82.1	15.054	140	0	323.31	232090000	212760000	255040000	141120000	13685000	17948000	23131000	14723000	13052000	19570000	104790000	4	24713500	25787000	23640000	28338000	15680000	6	1815050	1520500	1994200	2570100	1635900	1450300	2174400	1012300000
735	P07741	P07741	P07741	Adenine phosphoribosyltransferase	APRT	sp|P07741|APT_HUMAN Adenine phosphoribosyltransferase OS=Homo sapiens (Human) GN=APRT PE=1 SV=2	---	---	---	---	---	---	---	---	---	---	1	15	92.8	19.608	180	0	323.31	108730000	69418000	55718000	74911000	12256000	9066400	12820000	12641000	12088000	8297400	31328000	4	6013700	9060400	5784900	4643200	6242500	6	1014350	1021400	755530	1068400	1053400	1007300	691450	337510000
736	P07814	P07814	P07814	Bifunctional glutamate/proline--tRNA ligase;Glutamate--tRNA ligase;Proline--tRNA ligase	EPRS	sp|P07814|SYEP_HUMAN Bifunctional glutamate/proline--tRNA ligase OS=Homo sapiens (Human) GN=EPRS PE=1 SV=5	---	---	---	---	---	---	---	---	---	---	1	49	44.7	170.59	1512	0	323.31	27111000	11897000	21854000	28010000	2573400	2973800	2387800	2876300	3671000	2319600	1288700	4	298570	330630	145080	266510	341590	6	33229.5	31382	36266	29120	35077	44768	28288	25300000
737	P07858	P07858	P07858	Cathepsin B;Cathepsin B light chain;Cathepsin B heavy chain	CTSB	sp|P07858|CATB_HUMAN Cathepsin B OS=Homo sapiens (Human) GN=CTSB PE=1 SV=3	---	Degradation	Cathepsin	---	---	---	---	---	---	---	1	20	49	37.821	339	0	323.31	133910000	103070000	97634000	153810000	29731000	34763000	40426000	18947000	38664000	38171000	36269000	4	6236200	7047700	5424700	5138600	8095000	6	1919300	1564800	1829600	2127700	997210	2034900	2009000	377620000
738	P07900;Q14568;Q58FG0;Q58FF6	P07900	P07900	Heat shock protein HSP 90-alpha	HSP90AA1	sp|P07900|HS90A_HUMAN Heat shock protein HSP 90-alpha OS=Homo sapiens (Human) GN=HSP90AA1 PE=1 SV=5	NFE2L2	---	---	---	HSP90	HSP90	---	---	---	---	4	48	66.4	84.659	732	0	323.31	194380000	168370000	186610000	127540000	37664000	23212000	31049000	31148000	22932000	31440000	25889000	4	5378500	5890300	5102100	5654900	3864800	6	942390	1141300	703390	940890	943890	694900	952720	211560000
739	P07902	P07902	P07902	Galactose-1-phosphate uridylyltransferase	GALT	sp|P07902|GALT_HUMAN Galactose-1-phosphate uridylyltransferase OS=Homo sapiens (Human) GN=GALT PE=1 SV=3	---	---	---	---	---	---	---	---	---	---	1	5	30.6	43.363	379	0	34.945	3254800	1237600	2638400	3143400	906930	999290	640560	1181300	1358000		960010	4	180680	203420	77348	164900	196460	5	62456	56683	62456	40035	73834	84873		4412300
740	P07910;P0DMR1;O60812;B7ZW38;B2RXH8	P07910	P07910	Heterogeneous nuclear ribonucleoproteins C1/C2	HNRNPC	sp|P07910|HNRPC_HUMAN Heterogeneous nuclear ribonucleoproteins C1/C2 OS=Homo sapiens (Human) GN=HNRNPC PE=1 SV=4	HNF4A	---	---	---	---	---	---	---	---	---	5	6	30.4	33.67	306	0	17.646	1441300	1688000	1334400	553120	1788700	2039200	1166400	2011800	1569800	977290	857060	4	81639	84782	99293	78496	32537	6	98781.5	105220	119950	68610	118340	92343	57488	5193400
741	P07919	P07919	P07919	Cytochrome b-c1 complex subunit 6, mitochondrial	UQCRH	sp|P07919|QCR6_HUMAN Cytochrome b-c1 complex subunit 6, mitochondrial OS=Homo sapiens (Human) GN=UQCRH PE=1 SV=2	---	---	---	---	---	---	---	---	---	---	1	1	19.8	10.739	91	0	7.0982				328270							54711	1	54711				54711	0
742	P07942	P07942	P07942	Laminin subunit beta-1	LAMB1	sp|P07942|LAMB1_HUMAN Laminin subunit beta-1 OS=Homo sapiens (Human) GN=LAMB1 PE=1 SV=2	---	ECM	Laminin	---	---	---	---	---	---	---	1	11	12	198.04	1786	0	84.1	2266700	555720	921810	1246400	501750	388950	415710	656070	482200	823230	111600	4	14650	30632	7509.8	12457	16843	6	6648.3	6780.4	5256.1	5617.7	8865.8	6516.2	11125	1486000
743	P07947;P06239;P12931;P06241	P07947	P07947	Tyrosine-protein kinase Yes	YES1	sp|P07947|YES_HUMAN Tyrosine-protein kinase Yes OS=Homo sapiens (Human) GN=YES1 PE=1 SV=3	---	---	---	---	---	---	---	---	---	---	4	3	11.6	60.801	543	0	14.241	98544	142300					234480	235130	240550	251220	48089	2	4816.85	3941.8	5691.9			4	9513.7			9379.1	9405.3	9622.1	10049
744	P07948	P07948	P07948	Tyrosine-protein kinase Lyn	LYN	sp|P07948|LYN_HUMAN Tyrosine-protein kinase Lyn OS=Homo sapiens (Human) GN=LYN PE=1 SV=3	---	---	---	---	---	---	---	---	---	---	1	2	4.9	58.573	512	0.00077519	4.6187					153270	154230	122660	176720	162740	171730	34864	0						6	5869.65	5676.5	5712	4543.1	6545	6027.3	6360.3
745	P07954	P07954	P07954	Fumarate hydratase, mitochondrial	FH	sp|P07954|FUMH_HUMAN Fumarate hydratase, mitochondrial OS=Homo sapiens (Human) GN=FH PE=1 SV=3	---	---	---	---	---	---	---	---	---	---	1	20	58	54.636	510	0	323.31	47538000	70700000	64150000	55475000	12087000	15147000	16014000	11165000	13967000	14392000	12825000	4	2392500	1901500	2828000	2566000	2219000	6	567175	483490	605890	640550	446620	558660	575690	79011000
746	P08047	P08047	P08047	Transcription factor Sp1	SP1	sp|P08047|SP1_HUMAN Transcription factor Sp1 OS=Homo sapiens (Human) GN=SP1 PE=1 SV=3	SREBF1	#N/A	#N/A	SP1	---	---	---	---	---	---	1	2	5.5	80.692	785	0	10.138	230980			396220							62720	2	31360	23098			39622	0								308450
747	P08133	P08133	P08133	Annexin A6	ANXA6	sp|P08133|ANXA6_HUMAN Annexin A6 OS=Homo sapiens (Human) GN=ANXA6 PE=1 SV=3	---	---	---	---	---	---	---	---	---	---	1	44	67.3	75.872	673	0	323.31	126560000	108140000	102220000	115020000	10289000	13483000	14177000	16585000	14914000	20354000	12599000	4	2594900	2943300	2514900	2377200	2674900	6	338270	239280	313560	329700	385690	346840	473350	131980000
748	P08134	P08134	P08134	Rho-related GTP-binding protein RhoC	RHOC	sp|P08134|RHOC_HUMAN Rho-related GTP-binding protein RhoC OS=Homo sapiens (Human) GN=RHOC PE=1 SV=1	---	Trafficking	Rho	---	---	---	---	---	---	---	1	10	68.4	22.006	193	0	221.62	40103000	18987000	36359000	35384000	161050	1499100	1494900	558360	1665300	1531300	17218000	4	4483950	5012800	2373400	4544900	4423000	6	187130	20132	187390	186870	69795	208160	191410	142050000
749	P08183	P08183	P08183	Multidrug resistance protein 1	ABCB1	sp|P08183|MDR1_HUMAN Multidrug resistance protein 1 OS=Homo sapiens (Human) GN=ABCB1 PE=1 SV=3	RXRA	Canalicular Transporters (ABC)	P-glycoprotein	---	ABCB1 (MDR1)	---	---	---	ABCB1 (MDR1)	---	1	2	3.3	141.48	1280	0	9.6811	846770		570990	615530							31770	3	9617.7	13231		8921.7	9617.7	0								693290
750	P08195	P08195	P08195	4F2 cell-surface antigen heavy chain	SLC3A2	sp|P08195|4F2_HUMAN 4F2 cell-surface antigen heavy chain OS=Homo sapiens (Human) GN=SLC3A2 PE=1 SV=3	---	---	---	---	---	---	---	---	---	---	1	6	16	67.993	630	0	22.914	1342200	374490	2040900	956880	221990		160690	400350	229470		197480	4	39639.5	46283	12913	70377	32996	4	7783.75	7654.7		5541	13805	7912.8		1953900
751	P08236	P08236	P08236	Beta-glucuronidase	GUSB	sp|P08236|BGLR_HUMAN Beta-glucuronidase OS=Homo sapiens (Human) GN=GUSB PE=1 SV=2	---	---	---	---	---	---	---	---	---	---	1	19	40.1	74.731	651	0	295.62	21564000	17148000	12789000	18606000	1835900	3081900	1812700	1981400	2650300	1697000	3198700	4	687575	829370	659530	491870	715620	6	73409.5	70613	118530	69718	76206	101930	65270	33834000
752	P08238;Q58FF7	P08238	P08238	Heat shock protein HSP 90-beta	HSP90AB1	sp|P08238|HS90B_HUMAN Heat shock protein HSP 90-beta OS=Homo sapiens (Human) GN=HSP90AB1 PE=1 SV=4	NFE2L2	---	---	---	HSP90	HSP90	---	---	---	---	2	28	45.4	83.263	724	0	323.31	162560000	114930000	158530000	104940000	24162000	21042000	20558000	25901000	20829000	20680000	20428000	4	4143400	4926200	3482900	4803900	3179900	6	634410	732180	637650	622960	784890	631170	626680	169450000
753	P08240	P08240	P08240	Signal recognition particle receptor subunit alpha	SRPR	sp|P08240|SRPR_HUMAN Signal recognition particle receptor subunit alpha OS=Homo sapiens (Human) GN=SRPR PE=1 SV=2	---	---	---	---	---	---	---	---	---	---	1	11	29.2	69.81	638	0	164.45	3921400	2904800	4121600	1716500	234580	436150	427800	127940	195800	178190	407570	4	97517.5	112040	82995	117760	49044	6	6148.35	6702.3	12461	12223	3655.3	5594.4	5091.2	3740900
754	P08243	P08243	P08243	Asparagine synthetase [glutamine-hydrolyzing]	ASNS	sp|P08243|ASNS_HUMAN Asparagine synthetase [glutamine-hydrolyzing] OS=Homo sapiens (Human) GN=ASNS PE=1 SV=4	RXRA	---	---	---	---	---	---	---	---	---	1	3	9.6	64.369	561	0	11.042	241580	380850	1256500	218760							72335	4	10731.6	8330.3	13133	43328	7543.3	0								391870
755	P08263;P09210;Q16772;Q7RTV2	P08263;P09210	P08263	Glutathione S-transferase A1;Glutathione S-transferase A1, N-terminally processed;Glutathione S-transferase A2	GSTA1;GSTA2	sp|P08263|GSTA1_HUMAN Glutathione S-transferase A1 OS=Homo sapiens (Human) GN=GSTA1 PE=1 SV=3;sp|P09210|GSTA2_HUMAN Glutathione S-transferase A2 OS=Homo sapiens (Human) GN=GSTA2 PE=1 SV=4	---	---	---	---	GSTs	GST	---	---	---	---	4	19	83.8	25.631	222	0	323.31	454040000	302490000	295710000	221670000	18591000	63197000	28919000	39785000	23579000	5450700	132130000	4	27191000	41276000	27499000	26883000	20152000	6	2386300	1690100	5745200	2629000	3616800	2143600	495520	814750000
756	P08319	P08319	P08319	Alcohol dehydrogenase 4	ADH4	sp|P08319|ADH4_HUMAN Alcohol dehydrogenase 4 OS=Homo sapiens (Human) GN=ADH4 PE=1 SV=5	---	---	---	---	---	---	---	---	---	---	1	19	70	40.221	380	0	323.31	15819000	20723000	17357000	18274000	8884900	8606500	7934500	10600000	8193100	8988800	5970500	4	848355	753280	986830	826540	870170	6	416460	423090	409830	377840	504750	390150	428040	23012000
757	P08397	P08397	P08397	Porphobilinogen deaminase	HMBS	sp|P08397|HEM3_HUMAN Porphobilinogen deaminase OS=Homo sapiens (Human) GN=HMBS PE=1 SV=2	---	---	---	---	---	---	---	---	---	---	1	3	12.5	39.33	361	0	27.175	219570	544210	521550	312810	188510	405560	468140	175960	431080	285650	209000	4	24540.5	12916	32012	30680	18401	6	20329.5	11089	23856	27537	10350	25358	16803	299770
758	P08473	P08473	P08473	Neprilysin	MME	sp|P08473|NEP_HUMAN Neprilysin OS=Homo sapiens (Human) GN=MME PE=1 SV=2	---	---	---	---	---	---	---	---	---	---	1	20	35.6	85.513	750	0	323.31	15667000	5971900	14706000	11895000	1046600	1265700	959990	1160200	1380100	1176800	1380700	4	332510	391670	149300	367650	297370	6	29213.5	26166	31641	24000	29006	34504	29421	9884400
759	P08493	P08493	P08493	Matrix Gla protein	MGP	sp|P08493|MGP_HUMAN Matrix Gla protein OS=Homo sapiens (Human) GN=MGP PE=1 SV=2	---	---	---	---	---	---	---	---	---	---	1	1	10.7	12.353	103	0.0019656	3.5876	980920	697630	741110	1190400							902500	4	215255	245230	174410	185280	297590	0								6301700
760	P08559;P29803	P08559	P08559	Pyruvate dehydrogenase E1 component subunit alpha, somatic form, mitochondrial	PDHA1	sp|P08559|ODPA_HUMAN Pyruvate dehydrogenase E1 component subunit alpha, somatic form, mitochondrial OS=Homo sapiens (Human) GN=PDHA1 PE=1 SV=3	---	---	---	---	---	---	---	---	---	---	2	12	45.6	43.295	390	0	58.31	6438200	8495900	7343400	3815900	908940	694710	1191500	1808600	1545800	1059900	1513800	4	313215	292640	386180	333790	173450	6	51169	41316	31578	54160	82208	70265	48178	7290700
761	P08574	P08574	P08574	Cytochrome c1, heme protein, mitochondrial	CYC1	sp|P08574|CY1_HUMAN Cytochrome c1, heme protein, mitochondrial OS=Homo sapiens (Human) GN=CYC1 PE=1 SV=3	---	---	---	---	---	---	---	---	---	---	1	11	52	35.422	325	0	197.96	15630000	8700200	12830000	17442000	1341200	1284700	1427600	1443000	249800	1189200	3619800	4	837035	919390	511780	754680	1026000	6	77232.5	78897	75568	83978	84882	14694	69953	33924000
762	P08579	P08579	P08579	U2 small nuclear ribonucleoprotein B	SNRPB2	sp|P08579|RU2B_HUMAN U2 small nuclear ribonucleoprotein B OS=Homo sapiens (Human) GN=SNRPB2 PE=1 SV=1	---	---	---	---	---	---	---	---	---	---	1	4	27.6	25.486	225	0	32.013	3838900	1040300	1112300	1600300							759180	4	135630	383890	104030	111230	160030	0								4311900
763	P08581	P08581	P08581	Hepatocyte growth factor receptor	MET	sp|P08581|MET_HUMAN Hepatocyte growth factor receptor OS=Homo sapiens (Human) GN=MET PE=1 SV=4	---	Membrane receptors	Growth factor receptor	MET	---	---	---	---	---	---	1	3	3.7	155.54	1390	0	14.721				406330							6064.6	1	6064.6				6064.6	0
764	P08603	P08603	P08603	Complement factor H	CFH	sp|P08603|CFAH_HUMAN Complement factor H OS=Homo sapiens (Human) GN=CFH PE=1 SV=4	---	---	---	---	---	---	---	---	---	---	1	2	2.4	139.09	1231	0	16.021	171850			187210				72086	67820		8179.9	2	2943.15	2817.3			3069	2	1146.75				1181.7	1111.8		171850
765	P08621	P08621	P08621	U1 small nuclear ribonucleoprotein 70 kDa	SNRNP70	sp|P08621|RU17_HUMAN U1 small nuclear ribonucleoprotein 70 kDa OS=Homo sapiens (Human) GN=SNRNP70 PE=1 SV=2	---	---	---	---	---	---	---	---	---	---	1	6	25.2	51.556	437	0	149.82	5020300	4587400	4886800	3267100	662890	700590	848010	706620	617760	802250	1300000	4	278655	295310	269850	287460	192180	6	41388.5	38994	41211	49883	41566	36339	47191	5433700
766	P08648	P08648	P08648	Integrin alpha-5;Integrin alpha-5 heavy chain;Integrin alpha-5 light chain	ITGA5	sp|P08648|ITA5_HUMAN Integrin alpha-5 OS=Homo sapiens (Human) GN=ITGA5 PE=1 SV=2	---	ECM	integrin	---	---	---	---	---	---	---	1	9	14.2	114.54	1049	0	122.98	4422900	1062500	2869900	3237200	530520	174400	588970	720710		498530	352640	4	76338.5	110570	26564	71748	80929	5	13263	13263	4359.9	14724	18018		12463	4001700
767	P08651;Q12857;O00712;Q14938	P08651	P08651	Nuclear factor 1 C-type	NFIC	sp|P08651|NFIC_HUMAN Nuclear factor 1 C-type OS=Homo sapiens (Human) GN=NFIC PE=1 SV=2	HNF1A	---	---	---	---	---	---	---	---	---	4	7	22.4	55.674	508	0	28.509	371260	1143200	480210	1050500	141120	184990	222650				138230	4	29437	14279	43971	18469	40405	3	7114.9	5427.7	7114.9	8563.5				532750
768	P08684;P24462;Q9HB55	P08684	P08684	Cytochrome P450 3A4	CYP3A4	sp|P08684|CP3A4_HUMAN Cytochrome P450 3A4 OS=Homo sapiens (Human) GN=CYP3A4 PE=1 SV=4	RXRA	---	---	---	CYP3A4	CYP	---	---	CYP3A4	---	3	18	39.6	57.343	503	0	171.97	17667000	22744000	23734000	20705000	75870	99859		1412500		190570	3937700	4	987465	803060	1033800	1078800	941130	4	6600.6	3448.7	4539		64205		8662.2	40828000
769	P08697	P08697	P08697	Alpha-2-antiplasmin	SERPINF2	sp|P08697|A2AP_HUMAN Alpha-2-antiplasmin OS=Homo sapiens (Human) GN=SERPINF2 PE=1 SV=3	---	ECM	serpin	---	---	---	---	---	---	---	1	1	4.9	54.565	491	0	31.654	140500			174140							14983	2	7491.35	6690.3			8292.4	0								147530
770	P08708	P08708	P08708	40S ribosomal protein S17	RPS17	sp|P08708|RS17_HUMAN 40S ribosomal protein S17 OS=Homo sapiens (Human) GN=RPS17 PE=1 SV=2	---	---	---	---	---	---	---	---	---	---	1	8	47.4	15.55	135	0	323.31	35408000	27103000	15672000	30920000	6791000	6525000	6970900	3396500	4410500	4332600	28306000	4	5802350	7081600	5420700	3134500	6184000	6	1093550	1358200	1305000	1394200	679300	882100	866510	128530000
771	P08727;CON__A2A4G1	P08727	P08727	Keratin, type I cytoskeletal 19	KRT19	sp|P08727|K1C19_HUMAN Keratin, type I cytoskeletal 19 OS=Homo sapiens (Human) GN=KRT19 PE=1 SV=4	---	---	---	---	---	---	---	---	---	---	2	1	7.5	44.105	400	0	26.447			348040				238440			191420	25093	1	11227			11227		2	6933.25			7691.6			6174.9
772	P08754	P08754	P08754	Guanine nucleotide-binding protein G(k) subunit alpha	GNAI3	sp|P08754|GNAI3_HUMAN Guanine nucleotide-binding protein G(k) subunit alpha OS=Homo sapiens (Human) GN=GNAI3 PE=1 SV=3	---	---	---	---	---	---	---	---	---	---	1	6	29.7	40.532	354	0	66.651	630190	2017800	2070500	986780	240370	304590	97736	552690	282580	301040	498960	4	100153	42013	134520	138040	65786	6	19453.5	16025	20306	6515.7	36846	18838	20069	1374800
773	P08758	P08758	P08758	Annexin A5	ANXA5	sp|P08758|ANXA5_HUMAN Annexin A5 OS=Homo sapiens (Human) GN=ANXA5 PE=1 SV=2	---	---	---	---	---	---	---	---	---	---	1	31	79.7	35.936	320	0	323.31	215490000	240690000	261270000	201480000	23183000	40153000	27418000	47074000	39920000	28232000	51132000	4	10367450	9794900	10940000	11876000	9158100	6	1548900	1053800	1825100	1246300	2139700	1814500	1283300	349390000
774	P08865	P08865	P08865	40S ribosomal protein SA	RPSA	sp|P08865|RSSA_HUMAN 40S ribosomal protein SA OS=Homo sapiens (Human) GN=RPSA PE=1 SV=4	---	---	---	---	---	---	---	---	---	---	1	15	63.4	32.854	295	0	323.31	39559000	44656000	45604000	45325000	18714000	19593000	14206000	20212000	20845000	20978000	22284000	4	3460850	3043000	3435100	3508000	3486600	6	1530950	1439500	1507100	1092800	1554800	1603400	1613700	114330000
775	P08962	P08962	P08962	CD63 antigen	CD63	sp|P08962|CD63_HUMAN CD63 antigen OS=Homo sapiens (Human) GN=CD63 PE=1 SV=2	---	---	---	---	---	---	---	---	---	---	1	2	13.4	25.636	238	0	9.0663	1464300	1032300	1800300	2640000	281490			293100			1073100	4	233185	209190	147470	257180	377140	2	41042	40213			41871			1929000
776	P09001	P09001	P09001	39S ribosomal protein L3, mitochondrial	MRPL3	sp|P09001|RM03_HUMAN 39S ribosomal protein L3, mitochondrial OS=Homo sapiens (Human) GN=MRPL3 PE=1 SV=1	---	---	---	---	---	---	---	---	---	---	1	3	18.4	38.632	348	0.00027315	6.054		331730	344830								35608	2	17804		17459	18149		0
777	P09012	P09012	P09012	U1 small nuclear ribonucleoprotein A	SNRPA	sp|P09012|SNRPA_HUMAN U1 small nuclear ribonucleoprotein A OS=Homo sapiens (Human) GN=SNRPA PE=1 SV=3	HNF4A	---	---	---	---	---	---	---	---	---	1	2	13.1	31.279	282	0	73.003	1146100	1483600		251590	123340			127990			261050	3	95511	95511	123630		20966	2	10472	10278			10666			1807300
778	P09104	P09104	P09104	Gamma-enolase	ENO2	sp|P09104|ENOG_HUMAN Gamma-enolase OS=Homo sapiens (Human) GN=ENO2 PE=1 SV=3	---	---	---	---	---	---	---	---	---	---	1	3	9.7	47.268	434	0	13.626	3696400	58178	101500000	2098000	621080			682170		28412000	6853400	4	144860	184820	2908.9	5075000	104900	3	34109	31054			34109		1420600	24746000
779	P09110	P09110	P09110	3-ketoacyl-CoA thiolase, peroxisomal	ACAA1	sp|P09110|THIK_HUMAN 3-ketoacyl-CoA thiolase, peroxisomal OS=Homo sapiens (Human) GN=ACAA1 PE=1 SV=2	---	---	---	---	---	---	---	---	---	---	1	24	72.9	44.292	424	0	323.31	55884000	75346000	72433000	81654000	32594000	31495000	34211000	32189000	39477000	39538000	26043000	4	3888950	2941300	3965600	3812300	4297600	6	1758050	1715500	1657600	1800600	1694200	2077800	2081000	112530000
780	P09132	P09132	P09132	Signal recognition particle 19 kDa protein	SRP19	sp|P09132|SRP19_HUMAN Signal recognition particle 19 kDa protein OS=Homo sapiens (Human) GN=SRP19 PE=1 SV=3	---	---	---	---	---	---	---	---	---	---	1	6	49.3	16.156	144	0	15.191	1589300	417510	1812000	2088600	451060	396130	402310				1022400	4	242950	227040	59644	258860	298360	3	57473	64437	56589	57473				6987200
781	P09234	P09234	P09234	U1 small nuclear ribonucleoprotein C	SNRPC	sp|P09234|RU1C_HUMAN U1 small nuclear ribonucleoprotein C OS=Homo sapiens (Human) GN=SNRPC PE=1 SV=1	---	---	---	---	---	---	---	---	---	---	1	2	18.9	17.394	159	0	34.525	171940	1987000	1655700	351830							694410	4	167300	28657	331160	275960	58639	0								3644700
782	P09327	P09327	P09327	Villin-1	VIL1	sp|P09327|VILI_HUMAN Villin-1 OS=Homo sapiens (Human) GN=VIL1 PE=1 SV=4	---	---	---	---	---	---	---	---	---	---	1	7	12.3	92.694	827	0	34.476	321860			946050	263670	273060	340500	298580	670410	334190	78371	2	14408	7315			21501	6	7190.6	5992.6	6205.9	7738.7	6785.9	15237	7595.3	606960
783	P09382	P09382	P09382	Galectin-1	LGALS1	sp|P09382|LEG1_HUMAN Galectin-1 OS=Homo sapiens (Human) GN=LGALS1 PE=1 SV=2	---	---	---	---	---	---	---	---	---	---	1	9	79.3	14.716	135	0	323.31	40622000	30535000	21987000	49513000	9640100	5387800	3892900	9739100	7214900	5880900	20490000	4	3953150	4513500	3392800	2443000	5501400	6	727545	1071100	598640	432540	1082100	801660	653430	230830000
784	P09417	P09417	P09417	Dihydropteridine reductase	QDPR	sp|P09417|DHPR_HUMAN Dihydropteridine reductase OS=Homo sapiens (Human) GN=QDPR PE=1 SV=2	---	---	---	---	---	---	---	---	---	---	1	15	71.7	25.789	244	0	323.31	21146000	15767000	24570000	25001000	2275800	6286700	2495000	3316100	3242900	2120800	7587300	4	1632700	1510400	1126200	1755000	1785800	6	204925	162560	449050	178210	236870	231640	151480	51655000
785	P09429;B2RPK0	P09429;B2RPK0	P09429	High mobility group protein B1;Putative high mobility group protein B1-like 1	HMGB1;HMGB1P1	sp|P09429|HMGB1_HUMAN High mobility group protein B1 OS=Homo sapiens (Human) GN=HMGB1 PE=1 SV=3;sp|B2RPK0|HGB1A_HUMAN Putative high mobility group protein B1-like 1 OS=Homo sapiens (Human) GN=HMGB1P1 PE=5 SV=1	HNF4A	---	---	---	---	---	---	---	---	---	2	4	14.4	24.893	215	0	102.72	4660600	10206000	908380	15836000	1796200	1040500	969420	647400	2576400	964770	6600900	4	1238885	776770	1701000	151400	2639300	6	167495	299370	173420	161570	107900	429400	160800	15615000
786	P09455	P09455	P09455	Retinol-binding protein 1	RBP1	sp|P09455|RET1_HUMAN Retinol-binding protein 1 OS=Homo sapiens (Human) GN=RBP1 PE=1 SV=2	RXRA	---	---	---	---	---	---	---	---	---	1	3	27.4	15.85	135	0	9.6415	336850		354000	225900							101860	3	37428	37428		39334	25100	0
787	P09471	P09471	P09471	Guanine nucleotide-binding protein G(o) subunit alpha	GNAO1	sp|P09471|GNAO_HUMAN Guanine nucleotide-binding protein G(o) subunit alpha OS=Homo sapiens (Human) GN=GNAO1 PE=1 SV=4	---	---	---	---	---	---	---	---	---	---	1	3	12.7	40.05	354	0	60.316	771510	1318200	1306900		152630	163460	174100	341070	143380		257130	3	76876	45383	77541	76876		5	9615.2	8978.5	9615.2	10241	20063	8434.3		1121300
788	P09497	P09497	P09497	Clathrin light chain B	CLTB	sp|P09497|CLCB_HUMAN Clathrin light chain B OS=Homo sapiens (Human) GN=CLTB PE=1 SV=1	---	Trafficking	Clathrin light chain	---	---	---	---	---	---	---	1	2	10.5	25.19	229	0.0026506	3.2655								892080			99120	0						1	99120				99120
789	P09525	P09525	P09525	Annexin A4	ANXA4	sp|P09525|ANXA4_HUMAN Annexin A4 OS=Homo sapiens (Human) GN=ANXA4 PE=1 SV=4	---	---	---	---	---	---	---	---	---	---	1	26	69.9	35.882	319	0	323.31	66062000	79761000	79717000	69675000	17755000	18422000	24581000	18714000	19551000	12491000	18488000	4	3395250	3002800	3625500	3623500	3167000	6	843995	807050	837370	1117300	850620	888690	567750	119890000
790	P09543	P09543	P09543	2,3-cyclic-nucleotide 3-phosphodiesterase	CNP	sp|P09543|CN37_HUMAN 2,3-cyclic-nucleotide 3-phosphodiesterase OS=Homo sapiens (Human) GN=CNP PE=1 SV=2	---	---	---	---	---	---	---	---	---	---	1	9	34.9	47.578	421	0	119.06	3207500	2560900	2929800	3647300	106630	309330	323400	287310	298740	338080	518850	4	113655	118800	94849	108510	135090	6	11260.5	3949.2	11457	11978	10641	11064	12521	4193700
791	P09601	P09601	P09601	Heme oxygenase 1	HMOX1	sp|P09601|HMOX1_HUMAN Heme oxygenase 1 OS=Homo sapiens (Human) GN=HMOX1 PE=1 SV=1	RXRA	---	---	---	---	HMOX1	---	---	---	---	1	4	23.3	32.818	288	0	11.972		459380	567400	492610	124000						117380	3	35186		32813	40529	35186	1	8857.2	8857.2
792	P09622	P09622	P09622	Dihydrolipoyl dehydrogenase, mitochondrial	DLD	sp|P09622|DLDH_HUMAN Dihydrolipoyl dehydrogenase, mitochondrial OS=Homo sapiens (Human) GN=DLD PE=1 SV=2	---	---	---	---	---	---	---	---	---	---	1	21	60.9	54.177	509	0	323.31	31908000	34871000	34752000	36979000	14686000	6670300	7335000	23125000	12075000	16213000	9937000	4	1582350	1450400	1585000	1579700	1680900	6	608190	667530	303190	333410	1051100	548850	736950	35401000
793	P09651;Q32P51	P09651;Q32P51	P09651	Heterogeneous nuclear ribonucleoprotein A1;Heterogeneous nuclear ribonucleoprotein A1, N-terminally processed;Heterogeneous nuclear ribonucleoprotein A1-like 2	HNRNPA1;HNRNPA1L2	sp|P09651|ROA1_HUMAN Heterogeneous nuclear ribonucleoprotein A1 OS=Homo sapiens (Human) GN=HNRNPA1 PE=1 SV=5;sp|Q32P51|RA1L2_HUMAN Heterogeneous nuclear ribonucleoprotein A1-like 2 OS=Homo sapiens (Human) GN=HNRNPA1L2 PE=2 SV=2	---	---	---	---	---	---	---	---	---	---	2	10	33.1	38.746	372	0	185.69	22238000	27822000	26097000	25409000	1566200			1552900		1625400	5906200	4	1430700	1235500	1545700	1449800	1411600	3	87010	87010			86274		90303	43936000
794	P09661	P09661	P09661	U2 small nuclear ribonucleoprotein A	SNRPA1	sp|P09661|RU2A_HUMAN U2 small nuclear ribonucleoprotein A OS=Homo sapiens (Human) GN=SNRPA1 PE=1 SV=2	---	---	---	---	---	---	---	---	---	---	1	10	44.3	28.415	255	0	123.58	5230100	4370900	3097400	6274200		219850	145860			124460	1946300	4	480050	523010	437090	309740	627420	3	14586		21985	14586			12446	10694000
795	P09668	P09668	P09668	Pro-cathepsin H;Cathepsin H mini chain;Cathepsin H;Cathepsin H heavy chain;Cathepsin H light chain	CTSH	sp|P09668|CATH_HUMAN Pro-cathepsin H OS=Homo sapiens (Human) GN=CTSH PE=1 SV=4	---	Degradation	Cathepsin	---	---	---	---	---	---	---	1	6	29.9	37.393	335	0	50.337	3916700	1158900	1171000	3421700	151630	326580	204540	159580	179440	151850	774420	4	164025	279760	82781	83640	244410	6	12107.5	10831	23327	14610	11398	12817	10846	5436700
796	P09871	P09871	P09871	Complement C1s subcomponent;Complement C1s subcomponent heavy chain;Complement C1s subcomponent light chain	C1S	sp|P09871|C1S_HUMAN Complement C1s subcomponent OS=Homo sapiens (Human) GN=C1S PE=1 SV=1	PPARA	---	---	---	---	---	---	---	---	---	1	6	12.6	76.684	688	0	18.166	451140	989440	1942700	510370		282930	173710	154540		208790	181290	4	28843	17352	38056	74720	19630	4	7355.8		10882	6681.1	5944		8030.5	508370
797	P09874	P09874	P09874	Poly [ADP-ribose] polymerase 1	PARP1	sp|P09874|PARP1_HUMAN Poly [ADP-ribose] polymerase 1 OS=Homo sapiens (Human) GN=PARP1 PE=1 SV=4	FOXO3	---	---	---	---	---	---	---	---	---	1	25	38.4	113.08	1014	0	288.3	23960000	8929700	18479000	22477000	1689700	2117400	1881100	2011100	2644700	2037000	1690700	4	401525	469810	175090	362330	440720	6	39688	33132	41518	36885	39434	51858	39942	20103000
798	P09914	P09914	P09914	Interferon-induced protein with tetratricopeptide repeats 1	IFIT1	sp|P09914|IFIT1_HUMAN Interferon-induced protein with tetratricopeptide repeats 1 OS=Homo sapiens (Human) GN=IFIT1 PE=1 SV=2	---	---	---	---	---	---	---	---	---	---	1	2	7.9	55.36	478	0	10.362		127970	82978								7813	2	3906.5		4739.8	3073.2		0
799	P09960	P09960	P09960	Leukotriene A-4 hydrolase	LTA4H	sp|P09960|LKHA4_HUMAN Leukotriene A-4 hydrolase OS=Homo sapiens (Human) GN=LTA4H PE=1 SV=2	---	---	---	---	---	---	---	---	---	---	1	24	49.6	69.284	611	0	323.31	19098000	12715000	17907000	31111000	3238700	3106600	3482600	4515300	2833000	2343000	2867100	4	528635	545660	363290	511610	888870	6	90647.5	92536	88759	99502	129010	80942	66942	24368000
800	P09972	P09972	P09972	Fructose-bisphosphate aldolase C	ALDOC	sp|P09972|ALDOC_HUMAN Fructose-bisphosphate aldolase C OS=Homo sapiens (Human) GN=ALDOC PE=1 SV=2	SREBF1	---	---	---	---	---	---	---	---	---	1	20	64.8	39.455	364	0	323.31	22968000	36549000	31811000	30325000	8694200	10818000	12667000	7997500	10238000	12001000	8003000	4	1350800	998590	1589100	1383100	1318500	6	457750	378010	470350	550760	347720	445150	521780	32878000
801	P0C024	P0C024	P0C024	Peroxisomal coenzyme A diphosphatase NUDT7	NUDT7	sp|P0C024|NUDT7_HUMAN Peroxisomal coenzyme A diphosphatase NUDT7 OS=Homo sapiens (Human) GN=NUDT7 PE=2 SV=1	---	---	---	---	---	---	---	---	---	---	1	2	10.1	26.942	238	0.0021908	3.42	575110			170280							62116	2	31058	47926			14190	0								513680
802	P0C0L4;CON__P01030	P0C0L4	P0C0L4	Complement C4-A;Complement C4 beta chain;Complement C4-A alpha chain;C4a anaphylatoxin;C4b-A;C4d-A;Complement C4 gamma chain	C4A	sp|P0C0L4|CO4A_HUMAN Complement C4-A OS=Homo sapiens (Human) GN=C4A PE=1 SV=2	---	---	---	---	---	---	---	---	---	---	2	3	3.2	192.78	1744	0	16.321	2271400	1217500	1778400	1967200				321400		300760	96996	4	23121	28042	15031	21956	24286	2	3840.45				3967.9		3713	2074000
803	P0C0L5	P0C0L5	P0C0L5	Complement C4-B;Complement C4 beta chain;Complement C4-B alpha chain;C4a anaphylatoxin;C4b-B;C4d-B;Complement C4 gamma chain	C4B	sp|P0C0L5|CO4B_HUMAN Complement C4-B OS=Homo sapiens (Human) GN=C4B PE=1 SV=2	---	---	---	---	---	---	---	---	---	---	1	49	45.9	192.75	1744	0	323.31	35505000	16427000	26141000	25303000	5929300	3752200	3486500	3988800	3831500	5063300	1597900	4	317550	438340	202810	322720	312380	6	48273	73202	46323	43043	49244	47302	62509	30171000
804	Q71UI9;P0C0S5	Q71UI9;P0C0S5	Q71UI9	Histone H2A.V;Histone H2A.Z	H2AFV;H2AFZ	sp|Q71UI9|H2AV_HUMAN Histone H2A.V OS=Homo sapiens (Human) GN=H2AFV PE=1 SV=3;sp|P0C0S5|H2AZ_HUMAN Histone H2A.Z OS=Homo sapiens (Human) GN=H2AFZ PE=1 SV=2	---	---	---	---	---	---	---	---	---	---	2	2	30.5	13.509	128	0	219.99	4709300	2325400	3881800	2673300		894790	297580	236260	755870		3154900	4	655515	941860	465090	776370	534660	4	105344		178960	59517	47252	151170		12309000
805	P0CG30;P0CG29	P0CG30;P0CG29	P0CG30	Glutathione S-transferase theta-2B;Glutathione S-transferase theta-2	GSTT2B;GSTT2	sp|P0CG30|GSTT2_HUMAN Glutathione S-transferase theta-2B OS=Homo sapiens (Human) GN=GSTT2B PE=1 SV=1;sp|P0CG29|GST2_HUMAN Glutathione S-transferase theta-2 OS=Homo sapiens (Human) GN=GSTT2 PE=1 SV=1	---	---	---	---	GSTs	GST	---	---	---	---	2	9	54.1	27.507	244	0	137.13	8207000	3404500	4490000	6280800	149720	150740	481750	371620	357080	366830	2205500	4	489585	746090	309500	408190	570980	6	32905	13611	13703	43795	33784	32462	33348	15076000
806	P0DI82;P0DI81	P0DI82;P0DI81	P0DI82	Trafficking protein particle complex subunit 2B;Trafficking protein particle complex subunit 2	TRAPPC2B;TRAPPC2	sp|P0DI82|TPC2B_HUMAN Trafficking protein particle complex subunit 2B OS=Homo sapiens (Human) GN=TRAPPC2B PE=1 SV=1;sp|P0DI81|TPC2A_HUMAN Trafficking protein particle complex subunit 2 OS=Homo sapiens (Human) GN=TRAPPC2 PE=1 SV=1	---	---	---	---	---	---	---	---	---	---	2	2	18.6	16.445	140	0	8.3406	574420	603630	280980	563400							337070	4	94818	95736	100600	46830	93900	0								3693900
807	P0DJI8;P0DJI9	P0DJI8;P0DJI9	P0DJI8	Serum amyloid A-1 protein;Amyloid protein A;Serum amyloid protein A(2-104);Serum amyloid protein A(3-104);Serum amyloid protein A(2-103);Serum amyloid protein A(2-102);Serum amyloid protein A(4-101);Serum amyloid A-2 protein	SAA1;SAA2	sp|P0DJI8|SAA1_HUMAN Serum amyloid A-1 protein OS=Homo sapiens (Human) GN=SAA1 PE=1 SV=1;sp|P0DJI9|SAA2_HUMAN Serum amyloid A-2 protein OS=Homo sapiens (Human) GN=SAA2 PE=1 SV=1	PPARA	---	---	---	---	---	---	---	---	---	2	4	52.5	13.532	122	0	35.971		1043100	3943800	6881000	638140		704810		687270	769420	2095400	3	563400		149020	563400	983000	4	99436	91162		100690		98182	109920
808	Q8NHU0;Q5HYN5;Q5DJT8;P0DMV2;P0DMV1;P0DMV0;P0DMU9;P0DMU8;P0DMU7;P0DMU6	Q8NHU0;Q5HYN5;Q5DJT8;P0DMV2;P0DMV1;P0DMV0;P0DMU9;P0DMU8;P0DMU7;P0DMU6	Q8NHU0	Cancer/testis antigen family 45 member A3;Cancer/testis antigen family 45 member A1;Cancer/testis antigen family 45 member A2;Cancer/testis antigen family 45 member A9;Cancer/testis antigen family 45 member A8;Cancer/testis antigen family 45 member A7;Cancer/testis antigen family 45 member A10;Cancer/testis antigen family 45 member A5;Cancer/testis antigen family 45 member A6;Cancer/testis antige…	CT45A3;CT45A1;CT45A2;CT45A9;CT45A8;CT45A7;CT45A10;CT45A5;CT45A6;CT45A4	sp|Q8NHU0|CT453_HUMAN Cancer/testis antigen family 45 member A3 OS=Homo sapiens (Human) GN=CT45A3 PE=1 SV=1;sp|Q5HYN5|CT451_HUMAN Cancer/testis antigen family 45 member A1 OS=Homo sapiens (Human) GN=CT45A1 PE=2 SV=1;sp|Q5DJT8|CT452_HUMAN Cancer/testis an	---	---	---	---	---	---	---	---	---	---	10	1	7.9	21.33	189	0.00076963	4.4517	177210										19690	1	19690	19690				0								383500
809	P0DMV9;P0DMV8	P0DMV9;P0DMV8	P0DMV9	Heat shock 70 kDa protein 1B;Heat shock 70 kDa protein 1A	HSPA1B;HSPA1A	sp|P0DMV9|HS71B_HUMAN Heat shock 70 kDa protein 1B OS=Homo sapiens (Human) GN=HSPA1B PE=1 SV=1;sp|P0DMV8|HS71A_HUMAN Heat shock 70 kDa protein 1A OS=Homo sapiens (Human) GN=HSPA1A PE=1 SV=1	---	---	---	---	---	---	---	---	---	---	2	35	72.5	70.051	641	0	323.31	72638000	69348000	78452000	78280000	20226000	27396000	25609000	22803000	27527000	19410000	13803000	4	2358050	2269900	2167100	2451600	2446200	6	756445	632070	856130	800290	712600	860230	606550	76668000
810	P10109	P10109	P10109	Adrenodoxin, mitochondrial	FDX1	sp|P10109|ADX_HUMAN Adrenodoxin, mitochondrial OS=Homo sapiens (Human) GN=FDX1 PE=1 SV=1	---	---	---	---	---	---	---	---	---	---	1	1	4.9	19.393	184	0.0056114	2.7283	1883200	1197100	1163400	2157800			901800	681620	760480	706620	727070	4	118471	144860	92082	89492	165980	4	56427			69370	52432	58499	54355	11942000
812	P10155	P10155	P10155	60 kDa SS-A/Ro ribonucleoprotein	TROVE2	sp|P10155|RO60_HUMAN 60 kDa SS-A/Ro ribonucleoprotein OS=Homo sapiens (Human) GN=TROVE2 PE=1 SV=2	---	---	---	---	---	---	---	---	---	---	1	10	31.8	60.67	538	0	81.437	2181400	4063000	5085200	1840400	405370	194600	197720	285880	169490	616140	518590	4	107660	75221	140100	175350	63463	6	8337.95	13978	6710.2	6818.1	9857.8	5844.3	21246	3378900
813	P10253	P10253	P10253	Lysosomal alpha-glucosidase;76 kDa lysosomal alpha-glucosidase;70 kDa lysosomal alpha-glucosidase	GAA	sp|P10253|LYAG_HUMAN Lysosomal alpha-glucosidase OS=Homo sapiens (Human) GN=GAA PE=1 SV=4	---	---	---	---	---	---	---	---	---	---	1	24	34.8	105.32	952	0	323.31	62309000	52856000	56450000	66401000	10750000	9077200	7699800	8827600	10091000	11715000	7794100	4	1562600	1639700	1391000	1485500	1747400	6	252215	282880	238870	202630	232300	265560	308280	198730000
814	P10301	P10301	P10301	Ras-related protein R-Ras	RRAS	sp|P10301|RRAS_HUMAN Ras-related protein R-Ras OS=Homo sapiens (Human) GN=RRAS PE=1 SV=1	---	Trafficking	Ras	---	---	RAS	RAS	---	---	---	1	5	31.7	23.48	218	0	14.702	976420	765880	1317400	1690200							316660	4	76460	65095	51059	87825	112680	0								3121700
815	P10412;P16402	P10412;P16402	P10412	Histone H1.4;Histone H1.3	HIST1H1E;HIST1H1D	sp|P10412|H14_HUMAN Histone H1.4 OS=Homo sapiens (Human) GN=HIST1H1E PE=1 SV=2;sp|P16402|H13_HUMAN Histone H1.3 OS=Homo sapiens (Human) GN=HIST1H1D PE=1 SV=2	---	---	---	---	---	---	---	---	---	---	2	9	26.9	21.865	219	0	182.08	21706000	33068000	53494000	55276000	25495000	55869000	41276000	18323000	20532000	19221000	38251000	4	4809050	2411800	3674300	5943800	6141800	6	2557050	2832700	6207700	4586200	2035900	2281400	2135600	89298000
816	P10515	P10515	P10515	Dihydrolipoyllysine-residue acetyltransferase component of pyruvate dehydrogenase complex, mitochondrial	DLAT	sp|P10515|ODP2_HUMAN Dihydrolipoyllysine-residue acetyltransferase component of pyruvate dehydrogenase complex, mitochondrial OS=Homo sapiens (Human) GN=DLAT PE=1 SV=3	---	---	---	---	---	---	---	---	---	---	1	7	20.4	68.996	647	0	18.747	350570	964870	1249300	2004700							134400	4	32560.5	10311	28378	36743	58963	0								866430
817	P10586	P10586	P10586	Receptor-type tyrosine-protein phosphatase F	PTPRF	sp|P10586|PTPRF_HUMAN Receptor-type tyrosine-protein phosphatase F OS=Homo sapiens (Human) GN=PTPRF PE=1 SV=2	---	Membrane receptors	cell adhesion and communication	PTP	---	---	---	---	---	PTPRF	1	2	2.4	212.88	1907	0	7.2845			113190	267750							3771.7	2	1885.85			1120.7	2651	0
818	P10599	P10599	P10599	Thioredoxin	TXN	sp|P10599|THIO_HUMAN Thioredoxin OS=Homo sapiens (Human) GN=TXN PE=1 SV=3	RXRA	---	---	---	---	TXN	---	---	---	---	1	11	89.5	11.737	105	0	323.31	55441000	24077000	61244000	37307000	32168000	34325000	30071000	12051000	37619000	31907000	50887000	4	6624800	7920100	3439500	8749200	5329500	6	4576750	4595400	4903600	4295900	1721500	5374200	4558100	532980000
819	P10606	P10606	P10606	Cytochrome c oxidase subunit 5B, mitochondrial	COX5B	sp|P10606|COX5B_HUMAN Cytochrome c oxidase subunit 5B, mitochondrial OS=Homo sapiens (Human) GN=COX5B PE=1 SV=2	---	---	---	---	---	---	---	---	---	---	1	8	61.2	13.696	129	0	70.465	6816100	5393700	7506300	6709000	283410			269180	2737900	270360	3748300	4	845320	852010	674220	938290	838630	4	34611	35427			33647	342240	33795	32886000
820	P10619	P10619	P10619	Lysosomal protective protein;Lysosomal protective protein 32 kDa chain;Lysosomal protective protein 20 kDa chain	CTSA	sp|P10619|PPGB_HUMAN Lysosomal protective protein OS=Homo sapiens (Human) GN=CTSA PE=1 SV=2	---	---	---	---	---	---	---	---	---	---	1	10	26	54.465	480	0	323.31	30061000	27480000	42167000	29782000	2689300	2640200	2887200	2826000	1853300	1910800	7594500	4	1574850	1582200	1446300	2219300	1567500	6	140250	141540	138960	151960	148740	97541	100570	97353000
821	P10620	P10620	P10620	Microsomal glutathione S-transferase 1	MGST1	sp|P10620|MGST1_HUMAN Microsomal glutathione S-transferase 1 OS=Homo sapiens (Human) GN=MGST1 PE=1 SV=1	---	---	---	---	GSTs	GST	---	---	---	---	1	10	80	17.598	155	0	323.31	72908000	79623000	90345000	72905000	3375500	546060	898320	3032800	567760	789600	64998000	4	15253500	14582000	15925000	18069000	14581000	6	168790	675100	109210	179660	606550	113550	157920	293950000
822	P10632	P10632	P10632	Cytochrome P450 2C8	CYP2C8	sp|P10632|CP2C8_HUMAN Cytochrome P450 2C8 OS=Homo sapiens (Human) GN=CYP2C8 PE=1 SV=2	---	---	---	---	CYP2C8	CYP	---	---	---	---	1	15	45.9	55.824	490	0	281.47	10419000	15229000	14922000	7460500	2224400	591110	1401600	1820800	1291600	1816200	2042000	4	452530	372120	543880	532940	266440	6	57461	79442	21111	50058	65027	46129	64864	18099000
823	P10636	P10636	P10636	Microtubule-associated protein tau	MAPT	sp|P10636|TAU_HUMAN Microtubule-associated protein tau OS=Homo sapiens (Human) GN=MAPT PE=1 SV=5	---	---	---	---	---	---	---	---	---	---	1	3	8.7	78.927	758	0.00028043	6.7999	599020	464590	477250	780920							58044	4	13453	14975	11615	11931	19523	0								880200
824	P10644	P10644	P10644	cAMP-dependent protein kinase type I-alpha regulatory subunit;cAMP-dependent protein kinase type I-alpha regulatory subunit, N-terminally processed	PRKAR1A	sp|P10644|KAP0_HUMAN cAMP-dependent protein kinase type I-alpha regulatory subunit OS=Homo sapiens (Human) GN=PRKAR1A PE=1 SV=1	GATA4	#N/A	#N/A	PKA	---	---	---	---	PKA	PKA	1	10	38.3	42.981	381	0	105.35	5433800	6576700	4390800	3719300	927810	2353300	2408800	1321000	1129600	461790	1511700	4	258545	285990	346140	231100	195750	6	64489.5	48832	123860	126780	69524	59455	24305	7072100
825	P10646	P10646	P10646	Tissue factor pathway inhibitor	TFPI	sp|P10646|TFPI1_HUMAN Tissue factor pathway inhibitor OS=Homo sapiens (Human) GN=TFPI PE=1 SV=1	---	---	---	---	---	---	---	---	---	---	1	3	17.8	35.015	304	0	38.474	164670		96174		149860	436630	436210		164360	160510	123720	2	10032.5	12667		7398		5	12643	11528	33587	33555		12643	12347	172910
826	P10746	P10746	P10746	Uroporphyrinogen-III synthase	UROS	sp|P10746|HEM4_HUMAN Uroporphyrinogen-III synthase OS=Homo sapiens (Human) GN=UROS PE=1 SV=1	---	---	---	---	---	---	---	---	---	---	1	1	5.7	28.627	265	0.00077121	4.4944			193540	260380							37826	2	18913			16128	21698	0
827	P10768	P10768	P10768	S-formylglutathione hydrolase	ESD	sp|P10768|ESTD_HUMAN S-formylglutathione hydrolase OS=Homo sapiens (Human) GN=ESD PE=1 SV=2	---	---	---	---	---	---	---	---	---	---	1	15	78.7	31.462	282	0	323.31	36401000	44604000	42753000	33041000	12736000	17140000	15510000	12152000	17359000	11500000	17371000	4	2826950	2600100	3186000	3053800	2360100	6	1008790	909680	1224300	1107900	867980	1240000	821420	80104000
828	P10809	P10809	P10809	60 kDa heat shock protein, mitochondrial	HSPD1	sp|P10809|CH60_HUMAN 60 kDa heat shock protein, mitochondrial OS=Homo sapiens (Human) GN=HSPD1 PE=1 SV=2	---	---	---	---	---	---	---	---	---	---	1	55	81	61.054	573	0	323.31	326920000	301310000	276530000	301810000	89261000	114800000	62151000	102960000	103310000	101370000	55638000	4	9423650	10216000	9415900	8641700	9431400	6	3192650	2789400	3587500	1942200	3217600	3228300	3167700	344080000
829	P10909	P10909	P10909	Clusterin;Clusterin beta chain;Clusterin alpha chain	CLU	sp|P10909|CLUS_HUMAN Clusterin OS=Homo sapiens (Human) GN=CLU PE=1 SV=1	---	---	---	---	---	---	---	---	---	---	1	10	26.7	52.494	449	0	294.57	9519900	18738000	19366000	13596000	4398200	1388000	6065100	4388600	1335700	6141400	4470400	4	850900	501050	986230	1019300	715570	6	231230	231480	73051	319220	230980	70299	323230	14130000
830	P11021	P11021	P11021	78 kDa glucose-regulated protein	HSPA5	sp|P11021|GRP78_HUMAN 78 kDa glucose-regulated protein OS=Homo sapiens (Human) GN=HSPA5 PE=1 SV=2	GATA4	---	---	---	---	---	---	---	---	---	1	34	57.3	72.332	654	0	323.31	214960000	163750000	189880000	234830000	65240000	60625000	67243000	55511000	69146000	71674000	39762000	4	6747350	7165300	5458400	6329400	7827800	6	2208050	2174700	2020800	2241400	1850400	2304900	2389100	231530000
831	P11047	P11047	P11047	Laminin subunit gamma-1	LAMC1	sp|P11047|LAMC1_HUMAN Laminin subunit gamma-1 OS=Homo sapiens (Human) GN=LAMC1 PE=1 SV=3	---	ECM	Laminin	---	---	---	---	---	---	---	1	3	3.5	177.6	1609	0.00053967	5.6528					101840	69580	94347		46142	68248	5137.2	0						5	940.27	1376.2	940.27	1275		623.54	922.26
832	P11117	P11117	P11117	Lysosomal acid phosphatase	ACP2	sp|P11117|PPAL_HUMAN Lysosomal acid phosphatase OS=Homo sapiens (Human) GN=ACP2 PE=1 SV=3	---	---	---	---	---	---	---	---	---	---	1	6	17.3	48.344	423	0	11.113	701090	1850800	866160	1067300							236070	4	50880	36900	97410	45588	56172	0								1058100
833	P11137	P11137	P11137	Microtubule-associated protein 2	MAP2	sp|P11137|MTAP2_HUMAN Microtubule-associated protein 2 OS=Homo sapiens (Human) GN=MAP2 PE=1 SV=4	---	---	---	---	---	---	---	---	---	---	1	9	7.7	199.52	1827	0	87.481	2123900	3773100	3987500	3876200	1485200	1325800	1624200	1800100	2744000	2105900	276070	4	42496	23599	41924	44305	43068	6	19024	16502	14731	18047	20001	30488	23399	2791500
834	P11142	P11142	P11142	Heat shock cognate 71 kDa protein	HSPA8	sp|P11142|HSP7C_HUMAN Heat shock cognate 71 kDa protein OS=Homo sapiens (Human) GN=HSPA8 PE=1 SV=1	---	---	---	---	---	---	---	---	---	---	1	44	74.1	70.897	646	0	323.31	185750000	156050000	186320000	158850000	38984000	51400000	40178000	50458000	67925000	52319000	29946000	4	5221200	5628700	4728800	5646000	4813700	6	1543300	1181300	1557600	1217500	1529000	2058300	1585400	199960000
835	P11166	P11166	P11166	Solute carrier family 2, facilitated glucose transporter member 1	SLC2A1	sp|P11166|GTR1_HUMAN Solute carrier family 2, facilitated glucose transporter member 1 OS=Homo sapiens (Human) GN=SLC2A1 PE=1 SV=2	---	---	---	---	---	---	---	---	---	SLC2A1	1	1	1.6	54.083	492	0.0058153	2.6545		123080	160000	109290							30182	3	9467.4		9467.4	12308	8407	0
836	P11168	P11168	P11168	Solute carrier family 2, facilitated glucose transporter member 2	SLC2A2	sp|P11168|GTR2_HUMAN Solute carrier family 2, facilitated glucose transporter member 2 OS=Homo sapiens (Human) GN=SLC2A2 PE=1 SV=1	SREBF1	---	---	---	---	---	---	---	---	SLC2A2	1	1	1.5	57.489	524	0.00054318	5.8724					149830	181190		138510	172040	168060	62280	0						5	12928	11526	13938		10655	13234	12928
837	P11171	P11171	P11171	Protein 4.1	EPB41	sp|P11171|41_HUMAN Protein 4.1 OS=Homo sapiens (Human) GN=EPB41 PE=1 SV=4	NFE2L2	Tight junction	ezrin/radixin/moesin	---	---	---	---	---	---	---	1	9	22.2	97.016	864	0	48.099	1948100	1248000	1550900	1349500	404760		714070		425760		177700	4	33725.5	45305	29024	36068	31383	3	9901.3	9413.1		16606		9901.3		1350500
838	P11172	P11172	P11172	Uridine 5-monophosphate synthase;Orotate phosphoribosyltransferase;Orotidine 5-phosphate decarboxylase	UMPS	sp|P11172|UMPS_HUMAN Uridine 5-monophosphate synthase OS=Homo sapiens (Human) GN=UMPS PE=1 SV=1	---	---	---	---	---	---	---	---	---	---	1	5	18.1	52.221	480	0	9.9845	1173100	646050	616680	754950							122720	4	26942	45119	24848	23719	29036	0								1228300
839	P11177	P11177	P11177	Pyruvate dehydrogenase E1 component subunit beta, mitochondrial	PDHB	sp|P11177|ODPB_HUMAN Pyruvate dehydrogenase E1 component subunit beta, mitochondrial OS=Homo sapiens (Human) GN=PDHB PE=1 SV=3	FOXO1	---	---	---	---	---	---	---	---	---	1	17	54	39.233	359	0	130.3	10932000	16091000	15998000	10111000	3335500	1705900	2378200	2646900	3403500	1425400	3239400	4	641180	520570	766250	761790	481500	6	119645	158830	81231	113250	126040	162070	67875	16128000
840	P11182	P11182	P11182	Lipoamide acyltransferase component of branched-chain alpha-keto acid dehydrogenase complex, mitochondrial	DBT	sp|P11182|ODB2_HUMAN Lipoamide acyltransferase component of branched-chain alpha-keto acid dehydrogenase complex, mitochondrial OS=Homo sapiens (Human) GN=DBT PE=1 SV=3	---	---	---	---	---	---	---	---	---	---	1	9	32.2	53.486	482	0	108.58	2184000	4289500	3186200	2283600	587430	994990	567460	731420	366860	806410	571350	4	97673.5	78000	153200	113790	81557	6	23551	20980	35535	20266	26122	13102	28800	4700400
841	P11216	P11216	P11216	Glycogen phosphorylase, brain form	PYGB	sp|P11216|PYGB_HUMAN Glycogen phosphorylase, brain form OS=Homo sapiens (Human) GN=PYGB PE=1 SV=5	---	---	---	---	---	---	---	---	---	PYG	1	21	33.3	96.695	843	0	151.72	7636000	5989800	12067000	16638000	912550	1881600	1640900	1613700	1349400	1693800	1049500	4	201055	155840	122240	246270	339560	6	33209.5	18624	38400	33487	32932	27538	34568	12267000
843	P11233	P11233	P11233	Ras-related protein Ral-A	RALA	sp|P11233|RALA_HUMAN Ras-related protein Ral-A OS=Homo sapiens (Human) GN=RALA PE=1 SV=1	---	Trafficking	Ras	---	---	---	---	---	---	---	1	9	55.3	23.567	206	0	113.16	6166000	3583600	5172700	5975700		376070	120460		394710	782540	2508000	4	619360	685110	398180	574750	663970	4	42821.5		41786	13385		43857	86949	11032000
844	P11234	P11234	P11234	Ras-related protein Ral-B	RALB	sp|P11234|RALB_HUMAN Ras-related protein Ral-B OS=Homo sapiens (Human) GN=RALB PE=1 SV=1	---	Trafficking	Ras	---	---	---	---	---	---	---	1	2	12.1	23.408	206	0	7.0761	127690	104390	1449500								186850	3	14188	14188	11598	161060		0								554530
845	P11245	P11245	P11245	Arylamine N-acetyltransferase 2	NAT2	sp|P11245|ARY2_HUMAN Arylamine N-acetyltransferase 2 OS=Homo sapiens (Human) GN=NAT2 PE=1 SV=1	---	---	---	---	---	---	---	---	---	---	1	3	15.9	33.542	290	0.00027473	6.2077		207640	230340	111170							42242	3	15972		15972	17719	8551.5	0
846	P11277	P11277	P11277	Spectrin beta chain, erythrocytic	SPTB	sp|P11277|SPTB1_HUMAN Spectrin beta chain, erythrocytic OS=Homo sapiens (Human) GN=SPTB PE=1 SV=5	---	---	---	---	---	---	---	---	---	---	1	1	1.5	246.47	2137	0.0051546	2.7815									451860		3557.9	0						1	3557.9					3557.9
847	P11279	P11279	P11279	Lysosome-associated membrane glycoprotein 1	LAMP1	sp|P11279|LAMP1_HUMAN Lysosome-associated membrane glycoprotein 1 OS=Homo sapiens (Human) GN=LAMP1 PE=1 SV=3	---	---	---	---	---	---	---	---	---	---	1	5	10.8	44.882	417	0	65.054	14741000	5910100	7368200	9086900	916660	788720	794770	954090	756510	783170	2215800	4	433030	775850	311060	387800	478260	6	41670.5	48245	41511	41830	50215	39816	41219	11883000
848	P11310	P11310	P11310	Medium-chain specific acyl-CoA dehydrogenase, mitochondrial	ACADM	sp|P11310|ACADM_HUMAN Medium-chain specific acyl-CoA dehydrogenase, mitochondrial OS=Homo sapiens (Human) GN=ACADM PE=1 SV=1	RXRA	---	---	---	---	---	---	---	---	---	1	17	47	46.588	421	0	323.31	22294000	34455000	43781000	29114000	10002000	16028000	13594000	7667900	13599000	12957000	10175000	4	1589250	1114700	1722800	2189000	1455700	6	663780	500120	801380	679700	383390	679960	647860	47662000
849	P11387;Q969P6	P11387	P11387	DNA topoisomerase 1	TOP1	sp|P11387|TOP1_HUMAN DNA topoisomerase 1 OS=Homo sapiens (Human) GN=TOP1 PE=1 SV=2	---	---	---	---	---	---	---	---	---	---	2	11	18.4	90.725	765	0	35.686	1324200	1868300	2208700	2992600		358260	116420	200790		126660	242000	4	53645	34847	49166	58124	78753	4	4308.7		9427.8	3063.7	5284.1		3333.3	1867300
850	P11413	P11413	P11413	Glucose-6-phosphate 1-dehydrogenase	G6PD	sp|P11413|G6PD_HUMAN Glucose-6-phosphate 1-dehydrogenase OS=Homo sapiens (Human) GN=G6PD PE=1 SV=4	SREBF1	---	---	---	---	---	---	---	---	---	1	35	79.6	59.256	515	0	323.31	112140000	122240000	111990000	106770000	37920000	20902000	21911000	29273000	31371000	31368000	17883000	4	3201950	3204100	3492700	3199800	3050600	6	866300	1083400	597210	626030	836380	896320	896220	192780000
851	P11441	P11441	P11441	Ubiquitin-like protein 4A	UBL4A	sp|P11441|UBL4A_HUMAN Ubiquitin-like protein 4A OS=Homo sapiens (Human) GN=UBL4A PE=1 SV=1	---	---	---	---	---	---	---	---	---	---	1	4	28.7	17.776	157	0	14.457	2144200	931020	981050	2995300	217720	84763		90738		97375	942770	4	195330	268030	116380	122630	374410	4	11757	27215	10595		11342		12172	7270200
852	P11498	P11498	P11498	Pyruvate carboxylase, mitochondrial	PC	sp|P11498|PYC_HUMAN Pyruvate carboxylase, mitochondrial OS=Homo sapiens (Human) GN=PC PE=1 SV=2	---	---	---	---	---	---	---	---	---	---	1	44	53.5	129.63	1178	0	323.31	53245000	32301000	37873000	47794000	5669000	4073700	7126500	7315300	6083800	8530300	3559500	4	725990	902460	547470	641910	810070	6	111955	96084	69045	120790	123990	103120	144580	49742000
853	P11509;Q16696;P20853	P11509;Q16696	P11509	Cytochrome P450 2A6;Cytochrome P450 2A13	CYP2A6	sp|P11509|CP2A6_HUMAN Cytochrome P450 2A6 OS=Homo sapiens (Human) GN=CYP2A6 PE=1 SV=3;sp|Q16696|CP2AD_HUMAN Cytochrome P450 2A13 OS=Homo sapiens (Human) GN=CYP2A13 PE=1 SV=3	---	---	---	---	---	CYP	---	---	---	---	3	3	8.9	56.501	494	0	8.614	212160	225020	543910	234300							39206	4	7408.45	6843.9	7258.8	17545	7558.1	0								376190
854	P11586	P11586	P11586	C-1-tetrahydrofolate synthase, cytoplasmic;Methylenetetrahydrofolate dehydrogenase;Methenyltetrahydrofolate cyclohydrolase;Formyltetrahydrofolate synthetase;C-1-tetrahydrofolate synthase, cytoplasmic, N-terminally processed	MTHFD1	sp|P11586|C1TC_HUMAN C-1-tetrahydrofolate synthase, cytoplasmic OS=Homo sapiens (Human) GN=MTHFD1 PE=1 SV=3	---	---	---	---	---	---	---	---	---	---	1	44	59.5	101.56	935	0	323.31	54463000	31954000	45827000	45012000	8806300	10143000	11527000	11036000	8465500	8621200	4535700	4	873455	1047400	614510	881290	865620	6	182200	169350	195050	221670	212230	162800	165790	37286000
855	P11712	P11712	P11712	Cytochrome P450 2C9	CYP2C9	sp|P11712|CP2C9_HUMAN Cytochrome P450 2C9 OS=Homo sapiens (Human) GN=CYP2C9 PE=1 SV=3	RXRA	---	---	---	CYP2C9	CYP	---	---	---	---	1	10	38.4	55.627	490	0	210.52	10180000	12089000	16284000	13518000	2283200	220370	925750	2141400	1301900	1307900	2410100	4	512145	407180	483560	651370	540730	6	52195.5	91329	8814.8	37030	85654	52076	52315	18387000
856	P11717	P11717	P11717	Cation-independent mannose-6-phosphate receptor	IGF2R	sp|P11717|MPRI_HUMAN Cation-independent mannose-6-phosphate receptor OS=Homo sapiens (Human) GN=IGF2R PE=1 SV=3	---	Membrane receptors	Growth factor receptor	---	---	---	---	---	---	---	1	14	10.5	274.37	2491	0	92.262	464150		408670	1118300	610340	518370	612430	569340	673400	860800	45951	3	3654.7	3654.7		3217.9	8805.8	6	4814	4805.8	4081.7	4822.2	4483	5302.3	6777.9	630520
857	P11766	P11766	P11766	Alcohol dehydrogenase class-3	ADH5	sp|P11766|ADHX_HUMAN Alcohol dehydrogenase class-3 OS=Homo sapiens (Human) GN=ADH5 PE=1 SV=4	---	---	---	---	---	---	---	---	---	---	1	15	69.5	39.724	374	0	323.31	17872000	31386000	30509000	21431000	5696600	3198500	3264800	3761900	3734400	5313700	6308400	4	1298550	893590	1569300	1525500	1071600	6	187410	284830	159920	163240	188100	186720	265690	38616000
858	P11908;P21108	P11908	P11908	Ribose-phosphate pyrophosphokinase 2	PRPS2	sp|P11908|PRPS2_HUMAN Ribose-phosphate pyrophosphokinase 2 OS=Homo sapiens (Human) GN=PRPS2 PE=1 SV=2	---	---	---	---	---	---	---	---	---	---	2	13	47.2	34.769	318	0	249.7	8003600	13168000	11111000	5644000	4213100	1426800	2845800	3060100	2459600	4774000	3544100	4	597345	500230	823000	694460	352750	6	184560	263320	89174	177860	191260	153720	298380	10768000
859	P11940;Q9H361;Q4VXU2;Q5JQF8	P11940	P11940	Polyadenylate-binding protein 1	PABPC1	sp|P11940|PABP1_HUMAN Polyadenylate-binding protein 1 OS=Homo sapiens (Human) GN=PABPC1 PE=1 SV=2	---	---	---	---	---	---	---	---	---	---	4	20	36.9	70.67	636	0	190.63	17098000	16035000	19154000	17000000	3817300	3249600	6408500	4874800	1900600	5891500	2650800	4	473585	474940	445410	532060	472230	6	120725	106040	90267	178020	135410	52794	163650	20778000
860	P12004	P12004	P12004	Proliferating cell nuclear antigen	PCNA	sp|P12004|PCNA_HUMAN Proliferating cell nuclear antigen OS=Homo sapiens (Human) GN=PCNA PE=1 SV=1	FOXO3	---	---	---	---	---	---	---	---	---	1	11	74.7	28.768	261	0	190.97	5662700	2936900	4412200	8254800	2568000	1838500	988700	1612900	1474400	1692200	1965100	4	314845	353920	183560	275770	515920	6	103285	160500	114900	61794	100810	92148	105760	9430100
861	P12081	P12081	P12081	Histidine--tRNA ligase, cytoplasmic	HARS	sp|P12081|SYHC_HUMAN Histidine--tRNA ligase, cytoplasmic OS=Homo sapiens (Human) GN=HARS PE=1 SV=2	---	---	---	---	---	---	---	---	---	---	1	13	41.1	57.41	509	0	62.736	3729000	3292300	3616300	2311100	970990	1588800	944720	1130300	776800	688090	680300	4	123365	133180	117580	129150	82538	6	34209	34678	56744	33740	40368	27743	24575	4432700
862	P12235;Q9H0C2	P12235	P12235	ADP/ATP translocase 1	SLC25A4	sp|P12235|ADT1_HUMAN ADP/ATP translocase 1 OS=Homo sapiens (Human) GN=SLC25A4 PE=1 SV=4	---	---	---	---	---	---	---	---	---	---	2	5	13.4	33.064	298	0	80.065	3983200	4134000	6183800	1538900	1501900	1369600	1538900		1426400	1600000	1163800	4	202930	199160	206700	309190	76947	5	75095	75095	68478	76943		71319	79998	8978200
863	P12236	P12236	P12236	ADP/ATP translocase 3;ADP/ATP translocase 3, N-terminally processed	SLC25A6	sp|P12236|ADT3_HUMAN ADP/ATP translocase 3 OS=Homo sapiens (Human) GN=SLC25A6 PE=1 SV=4	---	---	---	---	---	---	---	---	---	---	1	10	40.3	32.866	298	0	323.31	34231000	26901000	15056000	31886000	1916200	1888000	1160300	3742900	2732400	1886600	6070000	4	1469650	1711500	1345000	752790	1594300	6	95105	95810	94400	58017	187150	136620	94328	59167000
864	P12268	P12268	P12268	Inosine-5-monophosphate dehydrogenase 2	IMPDH2	sp|P12268|IMDH2_HUMAN Inosine-5-monophosphate dehydrogenase 2 OS=Homo sapiens (Human) GN=IMPDH2 PE=1 SV=2	FOXO3	---	---	---	---	---	---	---	---	---	1	13	46.3	55.804	514	0	109.44	3283700	5379400	4919800	4917400	847840	1940500	3389000	2999300	2419000	2419400	1478000	4	223575	149260	244520	223630	223520	6	109960	38538	88204	154040	136330	109950	109970	3690900
865	P12270	P12270	P12270	Nucleoprotein TPR	TPR	sp|P12270|TPR_HUMAN Nucleoprotein TPR OS=Homo sapiens (Human) GN=TPR PE=1 SV=3	---	---	---	---	---	---	---	---	---	---	1	9	6.4	267.29	2363	0	190.29	346160	86631	107260	628590	1379800	1281800	1545300	1574000	935930	1744200	89164	4	2099.16	3205.2	802.14	993.13	5820.2	6	13542	12776	11869	14308	14574	8666	16150	369620
866	P12273	P12273	P12273	Prolactin-inducible protein	PIP	sp|P12273|PIP_HUMAN Prolactin-inducible protein OS=Homo sapiens (Human) GN=PIP PE=1 SV=1	---	---	---	---	---	---	---	---	---	---	1	2	18.5	16.572	146	0	6.8912	1085500	553900	639280	1339300							402010	4	95820.5	120610	61545	71031	148820	0								6522000
867	P12429	P12429	P12429	Annexin A3	ANXA3	sp|P12429|ANXA3_HUMAN Annexin A3 OS=Homo sapiens (Human) GN=ANXA3 PE=1 SV=3	---	---	---	---	---	---	---	---	---	---	1	9	36.8	36.375	323	0	24.164	660690	1968000	2116000	1068100		313410	214560		315700	356420	318770	4	69003.5	30032	89456	96182	48551	4	14298		14246	9752.9		14350	16201	1468700
868	P12694	P12694	P12694	2-oxoisovalerate dehydrogenase subunit alpha, mitochondrial	BCKDHA	sp|P12694|ODBA_HUMAN 2-oxoisovalerate dehydrogenase subunit alpha, mitochondrial OS=Homo sapiens (Human) GN=BCKDHA PE=1 SV=2	---	---	---	---	---	---	---	---	---	---	1	12	45.2	50.47	445	0	120.53	5021600	6114300	6043000	5752900	1354300	2075700	1224600	1243400	1333500	1311800	1259000	4	235920	200860	244570	241720	230120	6	52906.5	54173	83028	48985	49737	53340	52473	6401100
869	P12814;P35609	P12814	P12814	Alpha-actinin-1	ACTN1	sp|P12814|ACTN1_HUMAN Alpha-actinin-1 OS=Homo sapiens (Human) GN=ACTN1 PE=1 SV=2	HNF4A	Cytoskeleton	alpha-actinin	ACTN	---	---	---	---	---	---	2	33	50.2	103.06	892	0	323.31	25426000	24985000	33915000	40676000	2310700	1566500	1766600	1875600	912000	1664800	2598000	4	570585	488970	480480	652200	782240	6	32995	44437	30125	33974	36070	17539	32016	27863000
870	P12830	P12830	P12830	Cadherin-1;E-Cad/CTF1;E-Cad/CTF2;E-Cad/CTF3	CDH1	sp|P12830|CADH1_HUMAN Cadherin-1 OS=Homo sapiens (Human) GN=CDH1 PE=1 SV=3	HNF4A	#N/A	#N/A	CDH1	---	---	---	---	---	---	1	11	20.7	97.455	882	0	46.518	2089800	1358500	2369200	4074200	144640				150470	295510	388230	4	82574.5	77399	50313	87750	150900	3	5573.1	5357				5573.1	10945	2722700
871	P12955	P12955	P12955	Xaa-Pro dipeptidase	PEPD	sp|P12955|PEPD_HUMAN Xaa-Pro dipeptidase OS=Homo sapiens (Human) GN=PEPD PE=1 SV=3	---	---	---	---	---	---	---	---	---	---	1	23	55.8	54.548	493	0	323.31	19397000	21356000	27105000	18532000	7684000	6171300	8821000	6178700	6881000	8867400	5458100	4	849015	808190	889840	1129400	772190	6	303440	320170	257140	367540	257440	286710	369470	24521000
872	P12956	P12956	P12956	X-ray repair cross-complementing protein 6	XRCC6	sp|P12956|XRCC6_HUMAN X-ray repair cross-complementing protein 6 OS=Homo sapiens (Human) GN=XRCC6 PE=1 SV=2	NOTCH1	---	---	---	---	---	---	---	---	---	1	29	50.2	69.842	609	0	323.31	41072000	38202000	40684000	30541000	4474400	4515900	7700700	8330300	4398200	3957900	5746100	4	1232600	1283500	1193800	1271400	954400	6	140470	139820	141120	240650	260320	137440	123690	44140000
873	P13010	P13010	P13010	X-ray repair cross-complementing protein 5	XRCC5	sp|P13010|XRCC5_HUMAN X-ray repair cross-complementing protein 5 OS=Homo sapiens (Human) GN=XRCC5 PE=1 SV=3	HNF4A	---	---	---	---	---	---	---	---	---	1	35	65.3	82.704	732	0	323.31	53631000	37717000	57038000	59874000	5986600	9308200	7480000	7256100	7180500	9202200	6701900	4	1456150	1411300	992550	1501000	1575600	6	193895	157540	244950	196840	190950	188960	242160	66352000
874	P13073	P13073	P13073	Cytochrome c oxidase subunit 4 isoform 1, mitochondrial	COX4I1	sp|P13073|COX41_HUMAN Cytochrome c oxidase subunit 4 isoform 1, mitochondrial OS=Homo sapiens (Human) GN=COX4I1 PE=1 SV=1	---	---	---	---	---	---	---	---	---	---	1	5	23.1	19.576	169	0	35.951	10884000	14226000	5884500	10962000		1148600		906140			4001100	4	993030	989500	1293300	534960	996560	2	93398		104420		82376			38635000
875	P13164;Q01629;Q01628	P13164;Q01629;Q01628	P13164	Interferon-induced transmembrane protein 1;Interferon-induced transmembrane protein 2;Interferon-induced transmembrane protein 3	IFITM1;IFITM2;IFITM3	sp|P13164|IFM1_HUMAN Interferon-induced transmembrane protein 1 OS=Homo sapiens (Human) GN=IFITM1 PE=1 SV=3;sp|Q01629|IFM2_HUMAN Interferon-induced transmembrane protein 2 OS=Homo sapiens (Human) GN=IFITM2 PE=1 SV=2;sp|Q01628|IFM3_HUMAN Interferon-induce	---	---	---	---	---	---	---	---	---	---	3	1	12.8	13.964	125	0	21.616	537390	620770	643440	622500							1212000	4	310815	268690	310380	321720	311250	0								2333700
876	P13284	P13284	P13284	Gamma-interferon-inducible lysosomal thiol reductase	IFI30	sp|P13284|GILT_HUMAN Gamma-interferon-inducible lysosomal thiol reductase OS=Homo sapiens (Human) GN=IFI30 PE=1 SV=3	---	---	---	---	---	---	---	---	---	---	1	4	34	27.963	250	0	102.82	6054900	746110	5245700	5525600		912130	740140		881950	689080	2310600	4	598405	672770	82901	582850	613960	4	90116		101350	82237		97995	76564	12703000
877	P13473	P13473	P13473	Lysosome-associated membrane glycoprotein 2	LAMP2	sp|P13473|LAMP2_HUMAN Lysosome-associated membrane glycoprotein 2 OS=Homo sapiens (Human) GN=LAMP2 PE=1 SV=2	FOXO1	---	---	---	---	---	---	---	---	---	1	4	11.5	44.96	410	0	39.618	5111400	7114400	3460600	11790000			485270	448450			1495300	4	321730	269020	374440	182140	620530	2	24572			25541	23603			3056500
878	P13489	P13489	P13489	Ribonuclease inhibitor	RNH1	sp|P13489|RINI_HUMAN Ribonuclease inhibitor OS=Homo sapiens (Human) GN=RNH1 PE=1 SV=2	---	---	---	---	---	---	---	---	---	---	1	22	79.4	49.973	461	0	323.31	14667000	27772000	32122000	19291000	9007500	7869700	8783500	6950400	7830600	9197600	5518900	4	905035	564130	1068100	1235500	741970	6	320255	346440	302680	337830	267320	301180	353750	28316000
879	P13497	P13497	P13497	Bone morphogenetic protein 1	BMP1	sp|P13497|BMP1_HUMAN Bone morphogenetic protein 1 OS=Homo sapiens (Human) GN=BMP1 PE=1 SV=2	---	---	---	---	---	---	---	---	---	---	1	1	2.3	111.25	986	0.0026461	3.247	170490										3278.6	1	3278.6	3278.6				0								170490
880	P13584	P13584	P13584	Cytochrome P450 4B1	CYP4B1	sp|P13584|CP4B1_HUMAN Cytochrome P450 4B1 OS=Homo sapiens (Human) GN=CYP4B1 PE=1 SV=2	---	---	---	---	---	---	---	---	---	---	1	1	2.7	58.99	511	0.0012544	4.0224	583110	561680	469030	466610							71739	4	17770.5	20107	19368	16173	16090	0								731030
881	P13591	P13591	P13591	Neural cell adhesion molecule 1	NCAM1	sp|P13591|NCAM1_HUMAN Neural cell adhesion molecule 1 OS=Homo sapiens (Human) GN=NCAM1 PE=1 SV=3	---	---	---	---	---	---	---	---	---	---	1	2	5.6	94.573	858	0	10.871	428170		139870	385010							25080	3	10132	11268		3680.7	10132	0								383040
882	P13639	P13639	P13639	Elongation factor 2	EEF2	sp|P13639|EF2_HUMAN Elongation factor 2 OS=Homo sapiens (Human) GN=EEF2 PE=1 SV=4	---	---	---	---	---	---	---	---	---	---	1	50	65.4	95.337	858	0	323.31	215870000	198050000	216580000	210200000	54450000	46405000	50132000	80503000	67595000	62237000	26712000	4	4734150	4797100	4401100	4813000	4671200	6	1296500	1210000	1031200	1114000	1789000	1502100	1383000	244690000
883	P13667	P13667	P13667	Protein disulfide-isomerase A4	PDIA4	sp|P13667|PDIA4_HUMAN Protein disulfide-isomerase A4 OS=Homo sapiens (Human) GN=PDIA4 PE=1 SV=2	NFE2L2	---	---	---	---	---	---	---	---	---	1	47	60	72.932	645	0	323.31	138020000	116850000	115490000	114880000	23706000	23812000	26369000	27390000	36358000	22709000	16989000	4	3057100	3632100	3074900	3039300	3023200	6	660280	623840	626640	693920	720780	956790	597610	146730000
884	P13671	P13671	P13671	Complement component C6	C6	sp|P13671|CO6_HUMAN Complement component C6 OS=Homo sapiens (Human) GN=C6 PE=1 SV=3	---	---	---	---	---	---	---	---	---	---	1	6	10.7	104.79	934	0	10.598	956620	196140	1093200								46792	3	19930	19930	4086.3	22776		0								604760
885	P13674	P13674	P13674	Prolyl 4-hydroxylase subunit alpha-1	P4HA1	sp|P13674|P4HA1_HUMAN Prolyl 4-hydroxylase subunit alpha-1 OS=Homo sapiens (Human) GN=P4HA1 PE=1 SV=2	---	---	---	---	---	---	---	---	---	---	1	11	37.6	61.049	534	0	136.18	1473800	2980000	3361700	1364800	757260	554150	607620	519100	574290	593660	473570	4	82478	54586	110370	124510	50546	6	21628.5	28047	20524	22504	19226	21270	21987	2385500
886	P13688	P13688	P13688	Carcinoembryonic antigen-related cell adhesion molecule 1	CEACAM1	sp|P13688|CEAM1_HUMAN Carcinoembryonic antigen-related cell adhesion molecule 1 OS=Homo sapiens (Human) GN=CEACAM1 PE=1 SV=2	---	---	---	---	---	---	---	---	---	---	1	2	7.8	57.56	526	0.00054186	5.7658				530780							29488	1	29488				29488	0
887	P13693;Q56UQ5	P13693	P13693	Translationally-controlled tumor protein	TPT1	sp|P13693|TCTP_HUMAN Translationally-controlled tumor protein OS=Homo sapiens (Human) GN=TPT1 PE=1 SV=1	---	---	---	---	---	---	---	---	---	---	2	7	44.2	19.595	172	0	107.78	18743000	11995000	11927000	8829600	3536600	3122200	4774000	3682900	4537800	4881800	10861000	4	1708650	2677500	1713500	1703800	1261400	6	587195	505230	446030	682000	526130	648260	697410	37730000
888	P13716	P13716	P13716	Delta-aminolevulinic acid dehydratase	ALAD	sp|P13716|HEM2_HUMAN Delta-aminolevulinic acid dehydratase OS=Homo sapiens (Human) GN=ALAD PE=1 SV=1	---	---	---	---	---	---	---	---	---	---	1	13	47.3	36.294	330	0	124.95	12582000	13260000	9211700	10143000	1347100	1310300	991440	617430	921790	1286200	3229400	4	710160	786360	828720	575730	633960	6	71175	84193	81896	61965	38589	57612	80385	13746000
889	P13796	P13796	P13796	Plastin-2	LCP1	sp|P13796|PLSL_HUMAN Plastin-2 OS=Homo sapiens (Human) GN=LCP1 PE=1 SV=6	---	---	---	---	---	---	---	---	---	---	1	1	4	70.288	627	0.0005385	5.6194	260750	307080	270160	318140							31247	4	7800.5	7047.3	8299.5	7301.5	8598.5	0								273800
890	P13797	P13797	P13797	Plastin-3	PLS3	sp|P13797|PLST_HUMAN Plastin-3 OS=Homo sapiens (Human) GN=PLS3 PE=1 SV=4	---	---	---	---	---	---	---	---	---	---	1	26	51.1	70.81	630	0	323.31	13259000	20833000	13625000	11209000	4279900	3042300	2623600	4158500	2902900	2662600	2124200	4	363285	358340	563050	368230	302930	6	80340	115670	82224	70909	112390	78456	71962	16543000
891	P13798	P13798	P13798	Acylamino-acid-releasing enzyme	APEH	sp|P13798|ACPH_HUMAN Acylamino-acid-releasing enzyme OS=Homo sapiens (Human) GN=APEH PE=1 SV=4	---	---	---	---	---	---	---	---	---	---	1	26	55.5	81.224	732	0	323.31	24109000	18634000	26295000	27434000	5742700	6884300	6001900	6858500	7981600	5867000	4683000	4	869030	831340	642540	906720	945990	6	221730	198020	237390	206960	236500	275230	202310	30662000
892	P13804	P13804	P13804	Electron transfer flavoprotein subunit alpha, mitochondrial	ETFA	sp|P13804|ETFA_HUMAN Electron transfer flavoprotein subunit alpha, mitochondrial OS=Homo sapiens (Human) GN=ETFA PE=1 SV=1	---	---	---	---	---	---	---	---	---	---	1	21	69.1	35.079	333	0	323.31	55484000	70772000	90737000	66572000	26899000	20365000	28353000	19027000	32665000	28824000	21985000	4	3433600	2774200	3538600	4536900	3328600	6	1381300	1344900	1018200	1417700	951360	1633200	1441200	94875000
893	P13807	P13807	P13807	Glycogen [starch] synthase, muscle	GYS1	sp|P13807|GYS1_HUMAN Glycogen [starch] synthase, muscle OS=Homo sapiens (Human) GN=GYS1 PE=1 SV=2	---	---	---	---	---	---	---	---	---	GYS1	1	10	25.6	83.785	737	0	60.917	2217900	377810	740430	1332700	557280	352640	494410	458240	515290	523570	222660	4	30487	65233	11112	21777	39197	6	14849	16391	10372	14542	13478	15156	15399	1941800
894	P13861;P31323	P13861	P13861	cAMP-dependent protein kinase type II-alpha regulatory subunit	PRKAR2A	sp|P13861|KAP2_HUMAN cAMP-dependent protein kinase type II-alpha regulatory subunit OS=Homo sapiens (Human) GN=PRKAR2A PE=1 SV=2	---	#N/A	#N/A	PKA	---	---	---	---	PKA	PKA	2	18	55.4	45.518	404	0	323.31	8896000	12293000	15690000	11020000	4789100	4660700	8766100	2718000	7357100	6465200	3444000	4	485695	370670	512220	653770	459170	6	234465	199550	194200	365260	113250	306550	269380	16089000
895	P13928	P13928	P13928	Annexin A8	ANXA8	sp|P13928|ANXA8_HUMAN Annexin A8 OS=Homo sapiens (Human) GN=ANXA8 PE=1 SV=3	---	---	---	---	---	---	---	---	---	---	1	2	11	36.881	327	0.0002791	6.713				440410					358790	387700	62468	1	23179				23179	2	19644.5					18884	20405
896	P13929	P13929	P13929	Beta-enolase	ENO3	sp|P13929|ENOB_HUMAN Beta-enolase OS=Homo sapiens (Human) GN=ENO3 PE=1 SV=5	---	---	---	---	---	---	---	---	---	---	1	2	6.2	46.986	434	0.0026596	3.3179		137550				79524			80478	99613	20903	1	7239.5		7239.5			3	4235.7		4185.5			4235.7	5242.8
897	P13984	P13984	P13984	General transcription factor IIF subunit 2	GTF2F2	sp|P13984|T2FB_HUMAN General transcription factor IIF subunit 2 OS=Homo sapiens (Human) GN=GTF2F2 PE=1 SV=2	---	---	---	---	---	---	---	---	---	---	1	2	16.1	28.38	249	0	27.469	176370		242550	166930							32547	3	9798.2	9798.2		13475	9273.9	0								381680
898	P13987	P13987	P13987	CD59 glycoprotein	CD59	sp|P13987|CD59_HUMAN CD59 glycoprotein OS=Homo sapiens (Human) GN=CD59 PE=1 SV=1	---	---	---	---	---	---	---	---	---	---	1	4	31.2	14.177	128	0	28.621	23567000	8915400	17582000	21721000	935670			998900	892090	929050	12590000	4	3275300	3927800	1485900	2930400	3620200	4	155390	155940			166480	148680	154840	62076000
899	P14060	P14060	P14060	3 beta-hydroxysteroid dehydrogenase/Delta 5-->4-isomerase type 1;3-beta-hydroxy-Delta(5)-steroid dehydrogenase;Steroid Delta-isomerase	HSD3B1	sp|P14060|3BHS1_HUMAN 3 beta-hydroxysteroid dehydrogenase/Delta 5-->4-isomerase type 1 OS=Homo sapiens (Human) GN=HSD3B1 PE=1 SV=2	---	---	---	---	---	---	---	---	---	---	1	1	6.4	42.251	373	0.0056022	2.7096		115000	147140								16384	2	8191.9		7187.5	9196.3		0
900	P14061	P14061	P14061	Estradiol 17-beta-dehydrogenase 1	HSD17B1	sp|P14061|DHB1_HUMAN Estradiol 17-beta-dehydrogenase 1 OS=Homo sapiens (Human) GN=HSD17B1 PE=1 SV=3	---	---	---	---	---	---	---	---	---	---	1	1	4.6	34.95	328	0.0090992	2.337	833030										64079	1	64079	64079				0								1137300
901	P14174	P14174	P14174	Macrophage migration inhibitory factor	MIF	sp|P14174|MIF_HUMAN Macrophage migration inhibitory factor OS=Homo sapiens (Human) GN=MIF PE=1 SV=4	---	---	---	---	---	---	---	---	---	---	1	7	46.1	12.476	115	0	323.31	64171000	36842000	84222000	93620000	28886000	19492000	30805000	28722000	26513000	8353100	84325000	4	14839000	12834000	7368500	16844000	18724000	6	5523550	5777200	3898300	6161000	5744500	5302600	1670600	486140000
902	P14209	P14209	P14209	CD99 antigen	CD99	sp|P14209|CD99_HUMAN CD99 antigen OS=Homo sapiens (Human) GN=CD99 PE=1 SV=1	---	---	---	---	---	---	---	---	---	---	1	1	18.9	18.848	185	0.0047148	2.8751			273550								68387	1	68387			68387		0
903	P14314	P14314	P14314	Glucosidase 2 subunit beta	PRKCSH	sp|P14314|GLU2B_HUMAN Glucosidase 2 subunit beta OS=Homo sapiens (Human) GN=PRKCSH PE=1 SV=2	---	---	---	---	---	---	---	---	---	---	1	15	42.2	59.425	528	0	323.31	27697000	23426000	27186000	31039000	5326100	10068000	8856200	6791100	9674800	13974000	8633600	4	1444250	1457700	1232900	1430800	1633600	6	487660	280320	529890	466120	357430	509200	735500	25650000
904	P14324	P14324	P14324	Farnesyl pyrophosphate synthase	FDPS	sp|P14324|FPPS_HUMAN Farnesyl pyrophosphate synthase OS=Homo sapiens (Human) GN=FDPS PE=1 SV=4	PPARA	---	---	---	---	---	---	---	---	---	1	17	57.5	48.275	419	0	323.31	38689000	43879000	47946000	39759000	11323000	7566000	10823000	8054400	9600200	10350000	12666000	4	2323250	2149400	2437700	2663700	2208800	6	554180	629060	420340	601270	447470	533350	575010	72074000
905	P14384	P14384	P14384	Carboxypeptidase M	CPM	sp|P14384|CBPM_HUMAN Carboxypeptidase M OS=Homo sapiens (Human) GN=CPM PE=1 SV=2	---	---	---	---	---	---	---	---	---	---	1	3	12.6	50.513	443	0	8.6572	520090	206850									31606	2	15803.3	22613	8993.6			0								546120
906	P14406	P14406	P14406	Cytochrome c oxidase subunit 7A2, mitochondrial	COX7A2	sp|P14406|CX7A2_HUMAN Cytochrome c oxidase subunit 7A2, mitochondrial OS=Homo sapiens (Human) GN=COX7A2 PE=1 SV=1	---	---	---	---	---	---	---	---	---	---	1	5	59	9.3959	83	0	150.16	6285800	6848500	6727200	4579500	940840	364560	89884	955970	86339	76391	6738800	4	1626650	1571500	1712100	1681800	1144900	6	56805.5	235210	91140	22471	238990	21585	19098	38295000
907	P14550	P14550	P14550	Alcohol dehydrogenase [NADP(+)]	AKR1A1	sp|P14550|AK1A1_HUMAN Alcohol dehydrogenase [NADP(+)] OS=Homo sapiens (Human) GN=AKR1A1 PE=1 SV=3	---	---	---	---	---	AKR1A1	---	---	---	---	1	18	70.5	36.573	325	0	323.31	26064000	50002000	56849000	44944000	12395000	14915000	22737000	16607000	13095000	16135000	12443000	4	2157850	1184700	2272800	2584100	2042900	6	705680	563390	677950	1033500	754880	595250	733410	67215000
908	P14618	P14618	P14618	Pyruvate kinase PKM	PKM	sp|P14618|KPYM_HUMAN Pyruvate kinase PKM OS=Homo sapiens (Human) GN=PKM PE=1 SV=4	HNF4A	---	---	---	---	---	---	---	---	---	1	51	79.3	57.936	531	0	323.31	410470000	385240000	460230000	381150000	108070000	126790000	139640000	121370000	101300000	136000000	71826000	4	12056000	12438000	11674000	13946000	11550000	6	3759850	3274800	3842000	4231400	3677700	3069700	4121100	494110000
909	P14621	P14621	P14621	Acylphosphatase-2	ACYP2	sp|P14621|ACYP2_HUMAN Acylphosphatase-2 OS=Homo sapiens (Human) GN=ACYP2 PE=1 SV=2	---	---	---	---	---	---	---	---	---	---	1	5	49.5	11.139	99	0	16.518	2527400	2130900	1683900	605610	297710			117100			818080	4	211935	280830	236770	187100	67290	2	23045.5	33079			13012			13637000
910	P14625;Q58FF3	P14625	P14625	Endoplasmin	HSP90B1	sp|P14625|ENPL_HUMAN Endoplasmin OS=Homo sapiens (Human) GN=HSP90B1 PE=1 SV=1	NFE2L2	---	---	---	---	---	---	---	---	---	2	54	65	92.468	803	0	323.31	230380000	214190000	194770000	239500000	54167000	72990000	75408000	73967000	80080000	58172000	32340000	4	5557050	5759400	5354700	4869200	5987500	6	1836950	1354200	1824700	1885200	1849200	2002000	1454300	224720000
912	P63162;P14678	P63162;P14678	P63162	Small nuclear ribonucleoprotein-associated protein N;Small nuclear ribonucleoprotein-associated proteins B and B	SNRPN;SNRPB	sp|P63162|RSMN_HUMAN Small nuclear ribonucleoprotein-associated protein N OS=Homo sapiens (Human) GN=SNRPN PE=1 SV=1;sp|P14678|RSMB_HUMAN Small nuclear ribonucleoprotein-associated proteins B and B OS=Homo sapiens (Human) GN=SNRPB PE=1 SV=2	---	---	---	---	---	---	---	---	---	---	2	4	15	24.614	240	0	28.518	4886300	4333000	5079200	6682600	1345000	369760	1275600	1417000	1392300	1542200	1770200	4	311425	305400	270810	317450	417660	6	85542.5	84063	23110	79722	88562	87022	96385	16337000
913	P14735	P14735	P14735	Insulin-degrading enzyme	IDE	sp|P14735|IDE_HUMAN Insulin-degrading enzyme OS=Homo sapiens (Human) GN=IDE PE=1 SV=4	---	---	---	---	---	---	---	---	---	---	1	7	11.5	117.97	1019	0	23.373	361780	1031500	1435500	893020			151190				77460	4	19244.5	7235.5	20629	28711	17860	1	3023.7			3023.7				713830
914	P14854	P14854	P14854	Cytochrome c oxidase subunit 6B1	COX6B1	sp|P14854|CX6B1_HUMAN Cytochrome c oxidase subunit 6B1 OS=Homo sapiens (Human) GN=COX6B1 PE=1 SV=2	---	---	---	---	---	---	---	---	---	---	1	6	75.6	10.192	86	0	80.093	3537500	530050	5340000	6519400	1945200	1842400	2451100	1878800	3054600	2527700	4232400	4	634105	505360	75721	762850	931340	6	314025	277890	263200	350160	268400	436370	361090	37715000
915	P14859;Q9UKI9;P09086	P14859;Q9UKI9;P09086	P14859	POU domain, class 2, transcription factor 1;POU domain, class 2, transcription factor 3;POU domain, class 2, transcription factor 2	POU2F1;POU2F3;POU2F2	sp|P14859|PO2F1_HUMAN POU domain, class 2, transcription factor 1 OS=Homo sapiens (Human) GN=POU2F1 PE=1 SV=2;sp|Q9UKI9|PO2F3_HUMAN POU domain, class 2, transcription factor 3 OS=Homo sapiens (Human) GN=POU2F3 PE=2 SV=3;sp|P09086|PO2F2_HUMAN POU domain,	HNF1A	---	---	---	---	---	---	---	---	---	3	4	10.5	76.471	743	0	13.643	742190		169090	1019100							160870	3	61850	61850		14091	84929	0								635580
916	P14866	P14866	P14866	Heterogeneous nuclear ribonucleoprotein L	HNRNPL	sp|P14866|HNRPL_HUMAN Heterogeneous nuclear ribonucleoprotein L OS=Homo sapiens (Human) GN=HNRNPL PE=1 SV=2	---	---	---	---	---	---	---	---	---	---	1	16	44.8	64.132	589	0	228.11	4937800	6402100	5439400	6813600	2199900	182250	1773100	2025100	840610	1145500	1588000	4	296040	246890	320110	271970	340680	6	72967	109990	9112.3	88657	101250	42031	57277	4600100
917	P14868	P14868	P14868	Aspartate--tRNA ligase, cytoplasmic	DARS	sp|P14868|SYDC_HUMAN Aspartate--tRNA ligase, cytoplasmic OS=Homo sapiens (Human) GN=DARS PE=1 SV=2	---	---	---	---	---	---	---	---	---	---	1	16	40.1	57.136	501	0	246.15	8281300	11597000	11703000	8707900	155700	1100100		1324300		75336	1160700	4	274395	223820	313440	316290	235350	4	16970.1	4208.2	29732		35792		2036.1	14865000
918	P14920	P14920	P14920	D-amino-acid oxidase	DAO	sp|P14920|OXDA_HUMAN D-amino-acid oxidase OS=Homo sapiens (Human) GN=DAO PE=1 SV=3	---	---	---	---	---	---	---	---	---	---	1	1	6.3	39.474	347	0.00027871	6.6857	152770	170510	163040								48632	3	16304	15277	17051	16304		0								202190
919	P14923	P14923	P14923	Junction plakoglobin	JUP	sp|P14923|PLAK_HUMAN Junction plakoglobin OS=Homo sapiens (Human) GN=JUP PE=1 SV=3	---	---	---	---	---	---	---	---	---	---	1	9	24.8	81.744	745	0	89.949	1558500	1472000	2165700	2589700	638500	614910	437300	428600	244530	440310	230220	4	40481	33881	32000	47081	56297	6	9539.25	13880	13368	9506.6	9317.3	5315.9	9571.9	1654100
920	P14927	P14927	P14927	Cytochrome b-c1 complex subunit 7	UQCRB	sp|P14927|QCR7_HUMAN Cytochrome b-c1 complex subunit 7 OS=Homo sapiens (Human) GN=UQCRB PE=1 SV=2	---	---	---	---	---	---	---	---	---	---	1	10	62.2	13.53	111	0	323.31	12092000	13075000	15684000	16386000	2778300	3671200	4072800	3886700	2992500	3184800	12970000	4	2396550	2015300	2179100	2614000	2731000	6	571330	463050	611870	678810	647780	498750	530790	98306000
921	P15090	P15090	P15090	Fatty acid-binding protein, adipocyte	FABP4	sp|P15090|FABP4_HUMAN Fatty acid-binding protein, adipocyte OS=Homo sapiens (Human) GN=FABP4 PE=1 SV=3	SREBF1	---	---	---	---	---	---	---	---	---	1	6	53.8	14.719	132	0	63.581	3897700	4314000	3618700	2885900			388410			371430	2210900	4	536880	556810	616290	516950	412270	2	54274			55487			53061	22281000
922	P15104	P15104	P15104	Glutamine synthetase	GLUL	sp|P15104|GLNA_HUMAN Glutamine synthetase OS=Homo sapiens (Human) GN=GLUL PE=1 SV=4	HNF1A	---	---	---	---	---	---	---	---	---	1	13	52	42.064	373	0	285.91	11285000	13303000	14904000	11107000	4133800	5809200	4578200	6008000	3723200	5322400	5345000	4	819620	752360	886880	993610	740470	6	330025	275580	387280	305220	400540	248220	354830	16598000
923	P15144	P15144	P15144	Aminopeptidase N	ANPEP	sp|P15144|AMPN_HUMAN Aminopeptidase N OS=Homo sapiens (Human) GN=ANPEP PE=1 SV=4	---	---	---	---	---	---	---	---	---	---	1	39	51.3	109.54	967	0	323.31	109250000	66527000	87851000	83999000	13378000	11205000	13050000	12089000	8707500	15167000	9360600	4	1909450	2427800	1478400	1952300	1866600	6	279325	297280	249010	290010	268640	193500	337040	115880000
924	P15153	P15153	P15153	Ras-related C3 botulinum toxin substrate 2	RAC2	sp|P15153|RAC2_HUMAN Ras-related C3 botulinum toxin substrate 2 OS=Homo sapiens (Human) GN=RAC2 PE=1 SV=1	---	Trafficking	Rho	RAC/CDC	---	---	---	---	---	---	1	1	7.3	21.429	192	0.0047181	2.882	162900		779370	1053100							249420	3	97421	20362		97421	131630	0								352530
925	P15170	P15170	P15170	Eukaryotic peptide chain release factor GTP-binding subunit ERF3A	GSPT1	sp|P15170|ERF3A_HUMAN Eukaryotic peptide chain release factor GTP-binding subunit ERF3A OS=Homo sapiens (Human) GN=GSPT1 PE=1 SV=1	NFE2L2	---	---	---	---	---	---	---	---	---	1	11	36.9	55.755	499	0	117.29	4702800	3317100	4439800	4095000	1504400	786260	837160	372670	1077900	593440	835630	4	164130	180880	127580	170760	157500	6	31219.5	57861	30241	32198	14333	41456	22824	3283900
926	P15289	P15289	P15289	Arylsulfatase A;Arylsulfatase A component B;Arylsulfatase A component C	ARSA	sp|P15289|ARSA_HUMAN Arylsulfatase A OS=Homo sapiens (Human) GN=ARSA PE=1 SV=3	---	---	---	---	---	---	---	---	---	---	1	6	19.9	53.588	507	0	113.85	7307500	8245700	8686100	6774700	2606900	2156200	1621900	3448700	3269500	692470	2800600	4	486040	456720	515360	542880	423420	6	148850	162930	134770	101370	215540	204350	43279	6991600
927	P15311	P15311	P15311	Ezrin	EZR	sp|P15311|EZRI_HUMAN Ezrin OS=Homo sapiens (Human) GN=EZR PE=1 SV=4	---	Tight junction	ezrin/radixin/moesin	---	---	---	---	---	---	---	1	11	24.1	69.412	586	0	144.02	11596000	10095000	12520000	14176000	4287200	1930400	2078900	3763200	1948300	2131100	2016400	4	376810	362370	315470	391250	443010	6	65781.5	133970	60326	64967	117600	60884	66596	12813000
928	P15328	P15328	P15328	Folate receptor alpha	FOLR1	sp|P15328|FOLR1_HUMAN Folate receptor alpha OS=Homo sapiens (Human) GN=FOLR1 PE=1 SV=3	HNF1A	---	---	---	---	---	---	---	---	---	1	4	19.1	29.819	257	0	19.92	350330	276570		195390	183340		318210	130200			121170	3	23048	29194	23048		16283	3	15278	15278		26518	10850			338810
929	P15374	P15374	P15374	Ubiquitin carboxyl-terminal hydrolase isozyme L3	UCHL3	sp|P15374|UCHL3_HUMAN Ubiquitin carboxyl-terminal hydrolase isozyme L3 OS=Homo sapiens (Human) GN=UCHL3 PE=1 SV=1	---	---	---	---	---	---	---	---	---	---	1	8	41.7	26.182	230	0	72.763	6119700	2290200	7864300	6177600	1045300	853500	1178700	763660	897130		2265800	4	512390	509980	190850	655360	514800	5	74761	87111	71125	98229	63638	74761		11841000
930	P15428	P15428	P15428	15-hydroxyprostaglandin dehydrogenase [NAD(+)]	HPGD	sp|P15428|PGDH_HUMAN 15-hydroxyprostaglandin dehydrogenase [NAD(+)] OS=Homo sapiens (Human) GN=HPGD PE=1 SV=1	---	---	---	---	---	---	---	---	---	---	1	12	62.4	28.977	266	0	175.42	10343000	9804300	10222000	10016000	281230	927610	148860	1368600	801780	1597800	3250800	4	722770	738800	700310	730120	715420	6	61764	20088	66258	10633	97759	57270	114130	24879000
931	P15531	P15531	P15531	Nucleoside diphosphate kinase A	NME1	sp|P15531|NDKA_HUMAN Nucleoside diphosphate kinase A OS=Homo sapiens (Human) GN=NME1 PE=1 SV=1	RXRA	---	---	---	---	---	---	---	---	---	1	10	75.7	17.149	152	0	244.08	39340000	35574000	42327000	26405000	11558000	5188900	10408000	7316800	8337000	8582400	21671000	4	4161850	4371100	3952600	4703000	2933900	6	939965	1284200	576540	1156500	812980	926330	953600	145200000
932	P15559	P15559	P15559	NAD(P)H dehydrogenase [quinone] 1	NQO1	sp|P15559|NQO1_HUMAN NAD(P)H dehydrogenase [quinone] 1 OS=Homo sapiens (Human) GN=NQO1 PE=1 SV=1	---	---	---	---	NQO	NQO	---	---	---	---	1	5	28.8	30.867	274	0	43.933	599230	882610	1359700	1278700							316940	4	83127.5	46094	67893	104590	98362	0								2269100
933	P15586	P15586	P15586	N-acetylglucosamine-6-sulfatase	GNS	sp|P15586|GNS_HUMAN N-acetylglucosamine-6-sulfatase OS=Homo sapiens (Human) GN=GNS PE=1 SV=3	---	---	---	---	---	---	---	---	---	---	1	11	32.1	62.081	552	0	120.68	12129000	9154100	11434000	7956500	4790600	4485000	4980500	4159500	3990700	6786200	2911100	4	428915	505380	381420	476410	331520	6	193245	199610	186880	207520	173310	166280	282760	11924000
934	P15880	P15880	P15880	40S ribosomal protein S2	RPS2	sp|P15880|RS2_HUMAN 40S ribosomal protein S2 OS=Homo sapiens (Human) GN=RPS2 PE=1 SV=2	---	---	---	---	---	---	---	---	---	---	1	11	36.2	31.324	293	0	66.636	33152000	29475000	19215000	32368000	5163200	4974500	2450100	1771000	3318400	4017500	7550300	4	1717850	1841800	1637500	1067500	1798200	6	203770	286840	276360	136120	98388	184350	223190	62252000
935	P15924	P15924	P15924	Desmoplakin	DSP	sp|P15924|DESP_HUMAN Desmoplakin OS=Homo sapiens (Human) GN=DSP PE=1 SV=3	---	---	---	---	---	---	---	---	---	---	1	14	8.6	331.77	2871	0	75.334	434780		90528	629830	1020100	646080	1413900	1023800	492760	651430	39284	3	2667.4	2667.4		555.39	3864	6	5127.35	6258.2	3963.7	8674.4	6281.2	3023.1	3996.5
936	P15927	P15927	P15927	Replication protein A 32 kDa subunit	RPA2	sp|P15927|RFA2_HUMAN Replication protein A 32 kDa subunit OS=Homo sapiens (Human) GN=RPA2 PE=1 SV=1	HNF4A	---	---	---	---	---	---	---	---	---	1	7	50	29.247	270	0	40.314	1463100	293470	548730	988890		436940	297300	306350	588290	462480	538550	4	76881	146310	29347	54873	98889	5	43694		43694	29730	30635	58829	46248	614780
937	P15954	P15954	P15954	Cytochrome c oxidase subunit 7C, mitochondrial	COX7C	sp|P15954|COX7C_HUMAN Cytochrome c oxidase subunit 7C, mitochondrial OS=Homo sapiens (Human) GN=COX7C PE=1 SV=1	---	---	---	---	---	---	---	---	---	---	1	2	41.3	7.2454	63	0	9.8985	145910		2176200	1583400	345640	122660	125580	340130		119400	991780	3	316680	29181		435240	316680	5	25116	69127	24531	25116	68027		23880	5770100
938	P16070	P16070	P16070	CD44 antigen	CD44	sp|P16070|CD44_HUMAN CD44 antigen OS=Homo sapiens (Human) GN=CD44 PE=1 SV=3	---	---	---	---	---	---	---	---	---	---	1	3	5.1	81.537	742	0	32.132	1767000	396470	1230100	868340	799180	1276900	863690	814300	1329100	856290	377830	4	38860	65443	14684	45559	32161	6	31851	29599	47293	31988	30159	49225	31714	1321500
939	P16083	P16083	P16083	Ribosyldihydronicotinamide dehydrogenase [quinone]	NQO2	sp|P16083|NQO2_HUMAN Ribosyldihydronicotinamide dehydrogenase [quinone] OS=Homo sapiens (Human) GN=NQO2 PE=1 SV=5	---	---	---	---	NQO	NQO	---	---	---	---	1	10	65.8	25.918	231	0	102.18	3647300	2588100	2514900	5072500	105620	108300	601670	142270	134810	150760	1076200	4	222695	260520	184870	179630	362320	6	9895.7	7543.9	7735.6	42976	10162	9629.4	10768	6174100
940	Q8IUE6;P16104;Q96QV6	Q8IUE6;P16104;Q96QV6	Q8IUE6	Histone H2A type 2-B;Histone H2AX;Histone H2A type 1-A	HIST2H2AB;H2AFX;HIST1H2AA	sp|Q8IUE6|H2A2B_HUMAN Histone H2A type 2-B OS=Homo sapiens (Human) GN=HIST2H2AB PE=1 SV=3;sp|P16104|H2AX_HUMAN Histone H2AX OS=Homo sapiens (Human) GN=H2AFX PE=1 SV=2;sp|Q96QV6|H2A1A_HUMAN Histone H2A type 1-A OS=Homo sapiens (Human) GN=HIST1H2AA PE=1 S	---	---	---	---	---	---	---	---	---	---	3	3	45.4	13.995	130	0	45.233	2723200	1655600	2259800				509630				1429700	3	451970	544640	331120	451970		1	101930			101930				4655100
941	P16152	P16152	P16152	Carbonyl reductase [NADPH] 1	CBR1	sp|P16152|CBR1_HUMAN Carbonyl reductase [NADPH] 1 OS=Homo sapiens (Human) GN=CBR1 PE=1 SV=3	---	---	---	---	---	CBR1	---	---	---	---	1	17	72.2	30.375	277	0	323.31	34162000	52513000	57157000	41299000	16295000	18558000	17802000	16833000	14611000	20836000	17063000	4	2759200	2009500	3089000	3362200	2429400	6	1018695	958550	1091700	1047200	990190	859490	1225600	89067000
942	P16219	P16219	P16219	Short-chain specific acyl-CoA dehydrogenase, mitochondrial	ACADS	sp|P16219|ACADS_HUMAN Short-chain specific acyl-CoA dehydrogenase, mitochondrial OS=Homo sapiens (Human) GN=ACADS PE=1 SV=1	PPARA	---	---	---	---	---	---	---	---	---	1	7	25	44.297	412	0	40.468	1573100	2687900	2979200	1629900	196770	362800	384680	659830	378840	593990	602470	4	113627	82792	141470	156800	85784	6	20092.5	10357	19095	20246	34728	19939	31263	2499900
943	P16278;Q6UWU2	P16278	P16278	Beta-galactosidase	GLB1	sp|P16278|BGAL_HUMAN Beta-galactosidase OS=Homo sapiens (Human) GN=GLB1 PE=1 SV=2	---	---	---	---	---	---	---	---	---	---	2	17	34.9	76.074	677	0	118.82	12555000	20086000	17313000	13412000	2529200	3414400	1556000	3067800	1436000	2492200	2883800	4	568995	464990	743940	641240	496750	6	92988.5	93675	126460	57630	113620	53187	92302	16232000
944	P16383	P16383	P16383	GC-rich sequence DNA-binding factor 2	GCFC2	sp|P16383|GCFC2_HUMAN GC-rich sequence DNA-binding factor 2 OS=Homo sapiens (Human) GN=GCFC2 PE=1 SV=2	---	---	---	---	---	---	---	---	---	---	1	1	2	89.384	781	0.0033517	3.123				62265							1415.1	1	1415.1				1415.1	0
945	P16401	P16401	P16401	Histone H1.5	HIST1H1B	sp|P16401|H15_HUMAN Histone H1.5 OS=Homo sapiens (Human) GN=HIST1H1B PE=1 SV=3	---	---	---	---	---	---	---	---	---	---	1	5	19.5	22.58	226	0	120.52	4454100	8405200	9133400	5918700	7635400	3326800	5651700	4863100	3852900	4349600	5759100	4	716195	445410	840520	913340	591870	6	460635	763540	332680	565170	486310	385290	434960	15227000
946	P16403;P22492;Q02539	P16403	P16403	Histone H1.2	HIST1H1C	sp|P16403|H12_HUMAN Histone H1.2 OS=Homo sapiens (Human) GN=HIST1H1C PE=1 SV=2	---	---	---	---	---	---	---	---	---	---	3	3	9.9	21.364	213	0	81.822	14862000	25346000	17935000	16730000		7285600	2892800	8711700	5724400	12735000	12469000	4	1925850	1651400	2816200	1992800	1858900	5	809510		809510	321420	967970	636050	1415000	28312000
947	P16435	P16435	P16435	NADPH--cytochrome P450 reductase	POR	sp|P16435|NCPR_HUMAN NADPH--cytochrome P450 reductase OS=Homo sapiens (Human) GN=POR PE=1 SV=2	---	---	---	---	---	---	---	---	---	---	1	23	41.7	76.689	677	0	323.31	17723000	18543000	26086000	19904000	1287400	1422600	1799300	1038300	2475600	1833800	2489500	4	519560	478990	501180	705020	537940	6	43539	34796	38449	48629	28063	66908	49562	23021000
948	P16455	P16455	P16455	Methylated-DNA--protein-cysteine methyltransferase	MGMT	sp|P16455|MGMT_HUMAN Methylated-DNA--protein-cysteine methyltransferase OS=Homo sapiens (Human) GN=MGMT PE=1 SV=1	---	---	---	---	MGMT	---	---	---	---	---	1	5	37.2	21.646	207	0	46.551	2196200	2673900	1570700	3479400	113450	107210	280810	127720	130250	135340	1201700	4	270560	244020	297100	174520	386600	6	14331.5	12606	11913	31201	14191	14472	15037	6999900
949	P16615;O14983;Q93084	P16615	P16615	Sarcoplasmic/endoplasmic reticulum calcium ATPase 2	ATP2A2	sp|P16615|AT2A2_HUMAN Sarcoplasmic/endoplasmic reticulum calcium ATPase 2 OS=Homo sapiens (Human) GN=ATP2A2 PE=1 SV=1	GATA4	---	---	---	---	---	---	---	---	---	3	18	24.9	114.76	1042	0	227.49	5449000	7728600	10865000	7636700	1668900	217890	2397900	310530	1828500	903110	847960	4	167010	118460	168010	236200	166010	6	27956.5	36280	4736.8	52127	6750.6	39749	19633	8901700
950	P16662	P16662	P16662	UDP-glucuronosyltransferase 2B7	UGT2B7	sp|P16662|UD2B7_HUMAN UDP-glucuronosyltransferase 2B7 OS=Homo sapiens (Human) GN=UGT2B7 PE=1 SV=1	---	---	---	---	UGTs	UGTs	---	---	---	---	1	9	29.1	60.694	529	0	188.16	1963900	3624700	2327900	2072200	174610		280220	174780		263100	494610	4	100000	89270	164760	105810	94190	4	9951.7	7936.8		12737	7944.4		11959	2543700
951	P16930	P16930	P16930	Fumarylacetoacetase	FAH	sp|P16930|FAAA_HUMAN Fumarylacetoacetase OS=Homo sapiens (Human) GN=FAH PE=1 SV=2	---	---	---	---	---	---	---	---	---	---	1	21	73	46.374	419	0	323.31	44220000	35088000	43540000	40691000	8695300	8805300	9195200	10585000	8190500	8254300	9446300	4	1831100	1922600	1525600	1893000	1769200	6	380450	378060	382840	399790	460220	356110	358880	56623000
952	P16949;Q93045	P16949	P16949	Stathmin	STMN1	sp|P16949|STMN1_HUMAN Stathmin OS=Homo sapiens (Human) GN=STMN1 PE=1 SV=3	---	---	---	---	---	---	---	---	---	---	2	5	32.2	17.302	149	0	9.5074	2308100	1248400	2320700	2422900	637450	777710		735020		750550	1244500	4	257160	256460	138710	257860	269210	4	82531	70828	86412		81668		83394	8911600
953	P16989	P16989	P16989	Y-box-binding protein 3	YBX3	sp|P16989|YBOX3_HUMAN Y-box-binding protein 3 OS=Homo sapiens (Human) GN=YBX3 PE=1 SV=4	---	---	---	---	---	---	---	---	---	---	1	4	25.8	40.089	372	0	78.389	2728800	1382800	1926400	2233200	637730	669150	675860	642340	689770	640120	940470	4	159985	209910	106370	148190	171780	6	50442	49056	51473	51990	49411	53059	49240	1943100
954	P17029	P17029	P17029	Zinc finger protein with KRAB and SCAN domains 1	ZKSCAN1	sp|P17029|ZKSC1_HUMAN Zinc finger protein with KRAB and SCAN domains 1 OS=Homo sapiens (Human) GN=ZKSCAN1 PE=1 SV=3	---	---	---	---	---	---	---	---	---	---	1	1	4.8	63.629	563	0.0010106	4.1752				212100							7575.1	1	7575.1				7575.1	0
955	P17050	P17050	P17050	Alpha-N-acetylgalactosaminidase	NAGA	sp|P17050|NAGAB_HUMAN Alpha-N-acetylgalactosaminidase OS=Homo sapiens (Human) GN=NAGA PE=1 SV=2	---	---	---	---	---	---	---	---	---	---	1	12	33.1	46.564	411	0	115.18	12027000	8271000	9494200	12692000	1229600	1180900	1262400	1301300	1197400	678060	2740800	4	597800	668150	459500	527450	705110	6	67417	68314	65607	70135	72295	66520	37670	15027000
956	P17066;P48741	P17066;P48741	P17066	Heat shock 70 kDa protein 6;Putative heat shock 70 kDa protein 7	HSPA6;HSPA7	sp|P17066|HSP76_HUMAN Heat shock 70 kDa protein 6 OS=Homo sapiens (Human) GN=HSPA6 PE=1 SV=2;sp|P48741|HSP77_HUMAN Putative heat shock 70 kDa protein 7 OS=Homo sapiens (Human) GN=HSPA7 PE=5 SV=2	---	---	---	---	---	---	---	---	---	---	2	1	3.7	71.027	643	0	82.058					950700	808560	1015600	937600	906380	1057400	153410	0						6	25518	25695	21853	27448	25341	24497	28578
957	P17096	P17096	P17096	High mobility group protein HMG-I/HMG-Y	HMGA1	sp|P17096|HMGA1_HUMAN High mobility group protein HMG-I/HMG-Y OS=Homo sapiens (Human) GN=HMGA1 PE=1 SV=3	---	---	---	---	---	---	---	---	---	---	1	1	17.8	11.676	107	0	173.52	1460800	1861400	1546400	2556100		3375800					1800100	4	283980	243470	310230	257730	426020	1	562640		562640					7737200
958	P17152	P17152	P17152	Transmembrane protein 11, mitochondrial	TMEM11	sp|P17152|TMM11_HUMAN Transmembrane protein 11, mitochondrial OS=Homo sapiens (Human) GN=TMEM11 PE=1 SV=1	---	---	---	---	---	---	---	---	---	---	1	1	4.7	21.541	192	0.0055944	2.7003	159440		169410								41106	2	20553	19930		21176		0								692410
959	P17174	P17174	P17174	Aspartate aminotransferase, cytoplasmic	GOT1	sp|P17174|AATC_HUMAN Aspartate aminotransferase, cytoplasmic OS=Homo sapiens (Human) GN=GOT1 PE=1 SV=3	HNF1A	---	---	---	---	---	---	---	---	---	1	25	81.4	46.247	413	0	323.31	56012000	63152000	61647000	55542000	14963000	15657000	15217000	21343000	16033000	12974000	15115000	4	2674050	2546000	2870600	2802100	2524600	6	701685	680130	711670	691700	970130	728750	589720	88269000
960	P17252;P05771;P05129	P17252	P17252	Protein kinase C alpha type	PRKCA	sp|P17252|KPCA_HUMAN Protein kinase C alpha type OS=Homo sapiens (Human) GN=PRKCA PE=1 SV=4	NFE2L2	---	---	---	---	PKC	PRKCA	---	PRKCA	---	3	7	18.3	76.749	672	0	43.598	1560400	1105100	605310	1674400	620740	855450	902040	721730	672970	957890	293210	4	40386.5	47286	33487	18343	50740	6	23897	18810	25923	27335	21871	20393	29027	1535800
961	P17301	P17301	P17301	Integrin alpha-2	ITGA2	sp|P17301|ITA2_HUMAN Integrin alpha-2 OS=Homo sapiens (Human) GN=ITGA2 PE=1 SV=1	---	ECM	integrin	---	---	---	---	---	---	---	1	17	22.1	129.29	1181	0	79.465	3838400	608020	1189300	2909000		200430	95613			96681	198610	4	45537	85297	13512	26429	64645	3	2148.5		4454	2124.7			2148.5	3248400
962	P17405	P17405	P17405	Sphingomyelin phosphodiesterase	SMPD1	sp|P17405|ASM_HUMAN Sphingomyelin phosphodiesterase OS=Homo sapiens (Human) GN=SMPD1 PE=1 SV=4	---	---	---	---	---	---	---	---	---	---	1	2	3	69.751	629	0.0095044	2.2769	82920			222250							12207	2	6103.5	3316.8			8890.2	0								140960
963	P17480	P17480	P17480	Nucleolar transcription factor 1	UBTF	sp|P17480|UBF1_HUMAN Nucleolar transcription factor 1 OS=Homo sapiens (Human) GN=UBTF PE=1 SV=1	---	---	---	---	---	---	---	---	---	---	1	3	5.4	89.405	764	0	7.7772		443380	1031100	1100200		231770	249620				89884	3	30326		13040	30326	32359	2	7079.3		6816.9	7341.7
964	P17516	P17516	P17516	Aldo-keto reductase family 1 member C4	AKR1C4	sp|P17516|AK1C4_HUMAN Aldo-keto reductase family 1 member C4 OS=Homo sapiens (Human) GN=AKR1C4 PE=1 SV=3	---	---	---	---	---	---	---	---	AKR1C4	---	1	7	42.7	37.066	323	0	63.884	2542900	3500800	2528100	2634400		118510			538430		624370	4	136245	133840	184250	133060	138650	2	17287.6		6237.2			28338		4012400
965	P17568	P17568	P17568	NADH dehydrogenase [ubiquinone] 1 beta subcomplex subunit 7	NDUFB7	sp|P17568|NDUB7_HUMAN NADH dehydrogenase [ubiquinone] 1 beta subcomplex subunit 7 OS=Homo sapiens (Human) GN=NDUFB7 PE=1 SV=4	---	---	---	---	---	---	---	---	---	---	1	2	26.3	16.402	137	0.0093161	2.3156	147610		355160	547640							150060	3	50738	21087		50738	78235	0
966	P17612	P17612	P17612	cAMP-dependent protein kinase catalytic subunit alpha	PRKACA	sp|P17612|KAPCA_HUMAN cAMP-dependent protein kinase catalytic subunit alpha OS=Homo sapiens (Human) GN=PRKACA PE=1 SV=2	FOXO1	#N/A	#N/A	PKA	---	---	---	---	PKA	PKA	1	4	15.1	40.589	351	0	16.848	705210	1200000	426520	758250		173700		299340		144420	205970	4	40651.5	39178	66669	23695	42125	3	9650.1		9650.1		16630		8023.1	894700
967	P17655	P17655	P17655	Calpain-2 catalytic subunit	CAPN2	sp|P17655|CAN2_HUMAN Calpain-2 catalytic subunit OS=Homo sapiens (Human) GN=CAPN2 PE=1 SV=6	---	Degradation	Calpain (CAPN)	---	---	---	---	---	---	---	1	33	62.6	79.994	700	0	323.31	35154000	36669000	42096000	35504000	7301000	6248000	7163900	6952000	6454700	6042900	5745000	4	1093550	1065300	1111200	1275600	1075900	6	203135	221240	189330	217090	210670	195600	183120	42743000
968	P17812	P17812	P17812	CTP synthase 1	CTPS1	sp|P17812|PYRG1_HUMAN CTP synthase 1 OS=Homo sapiens (Human) GN=CTPS1 PE=1 SV=2	---	---	---	---	---	---	---	---	---	---	1	6	18.8	66.69	591	0	69.271	2071500	1517800	1747100	1871500							240260	4	60309	69049	50592	58236	62382	0								1956900
969	P17844	P17844	P17844	Probable ATP-dependent RNA helicase DDX5	DDX5	sp|P17844|DDX5_HUMAN Probable ATP-dependent RNA helicase DDX5 OS=Homo sapiens (Human) GN=DDX5 PE=1 SV=1	---	---	---	---	---	---	---	---	---	---	1	12	26.9	69.147	614	0	122.17	6680400	2859900	7648200	7054200	1633500	1579000	700570	1270400	1761600	1208400	1012400	4	214605	208760	89370	239010	220450	6	44521	51048	49343	21893	39699	55049	37762	6604200
970	P17858;Q01813	P17858	P17858	ATP-dependent 6-phosphofructokinase, liver type	PFKL	sp|P17858|PFKAL_HUMAN ATP-dependent 6-phosphofructokinase, liver type OS=Homo sapiens (Human) GN=PFKL PE=1 SV=6	---	---	---	---	---	---	---	---	---	---	2	19	45.6	85.018	780	0	122.54	14018000	9319600	7049700	12143000	629260	389090	988350	679560	1549800	1367300	1415700	4	315630	412300	274100	207340	357160	6	24528	18508	11444	29069	19987	45583	40215	11669000
971	P17900	P17900	P17900	Ganglioside GM2 activator;Ganglioside GM2 activator isoform short	GM2A	sp|P17900|SAP3_HUMAN Ganglioside GM2 activator OS=Homo sapiens (Human) GN=GM2A PE=1 SV=4	---	---	---	---	---	---	---	---	---	---	1	3	33.7	20.838	193	0	44.343	5459600	6041300	6850100	9427600	1397600	1790900	926940	1283300	1332100	1268600	4472300	4	805710	682450	755160	856260	1178400	6	163470	174700	223860	115870	160420	166520	158570	25714000
972	P17980	P17980	P17980	26S protease regulatory subunit 6A	PSMC3	sp|P17980|PRS6A_HUMAN 26S protease regulatory subunit 6A OS=Homo sapiens (Human) GN=PSMC3 PE=1 SV=3	NFE2L2	Degradation	Ubiquitin proteasome system (UPS)	---	---	---	---	---	---	---	1	15	50.8	49.203	439	0	156.31	6327800	12425000	11051000	5760000	1390700	1648500	1432000	269810	1272300	2035200	1615300	4	321830	234360	460190	409300	213330	6	52273.5	51509	61055	53038	9993	47121	75378	9946400
973	P17987	P17987	P17987	T-complex protein 1 subunit alpha	TCP1	sp|P17987|TCPA_HUMAN T-complex protein 1 subunit alpha OS=Homo sapiens (Human) GN=TCP1 PE=1 SV=1	---	---	---	---	---	---	---	---	---	---	1	26	68	60.343	556	0	323.31	21002000	16899000	29416000	22237000	4950500	6120800	6194600	6322500	3952300	4204800	3912900	4	697415	677490	545140	948910	717340	6	178570	159690	197450	199820	203950	127490	135640	20617000
974	P18065	P18065	P18065	Insulin-like growth factor-binding protein 2	IGFBP2	sp|P18065|IBP2_HUMAN Insulin-like growth factor-binding protein 2 OS=Homo sapiens (Human) GN=IGFBP2 PE=1 SV=2	---	---	---	---	---	---	---	---	---	---	1	5	24.6	34.814	325	0	72.204	510090	567580	848720	1055400	590770	774160	472780	610560	771510	745300	496200	4	50582	36435	40541	60623	75383	6	48423	42198	55297	33770	43611	55108	53235	1111000
975	P18077	P18077	P18077	60S ribosomal protein L35a	RPL35A	sp|P18077|RL35A_HUMAN 60S ribosomal protein L35a OS=Homo sapiens (Human) GN=RPL35A PE=1 SV=2	---	---	---	---	---	---	---	---	---	---	1	4	21.8	12.538	110	0	17.126	5105700	776720	6500200	1908600			1354100				2235000	4	501020	729390	110960	928600	272650	1	193450			193450				24046000
976	P18084	P18084	P18084	Integrin beta-5	ITGB5	sp|P18084|ITB5_HUMAN Integrin beta-5 OS=Homo sapiens (Human) GN=ITGB5 PE=1 SV=1	---	ECM	integrin	---	---	---	---	---	---	---	1	8	19.6	88.053	799	0	29.18	833920	783950	1587200	965060	60713		388310			269040	111100	4	20443	18953	17817	36073	21933	3	6114.7	1379.8		8825.2			6114.7	864740
977	P18085	P18085	P18085	ADP-ribosylation factor 4	ARF4	sp|P18085|ARF4_HUMAN ADP-ribosylation factor 4 OS=Homo sapiens (Human) GN=ARF4 PE=1 SV=3	---	---	---	---	---	---	---	---	---	---	1	17	82.8	20.511	180	0	323.31	73979000	47821000	55578000	58867000	569210	1285800	1041500	582120	508440	548680	21889000	4	5202000	6725400	4347400	5052500	5351500	6	52333	51746	116890	94678	52920	46222	49880	261910000
978	P18124	P18124	P18124	60S ribosomal protein L7	RPL7	sp|P18124|RL7_HUMAN 60S ribosomal protein L7 OS=Homo sapiens (Human) GN=RPL7 PE=1 SV=1	---	---	---	---	---	---	---	---	---	---	1	8	35.1	29.225	248	0	134.45	16104000	17759000	19069000	10738000	692310	2775700	1827300	721720	1723600	1926200	6111400	4	1410950	1342000	1479900	1589100	894810	6	147950	57693	231310	152270	60143	143630	160510	30587000
979	P18206	P18206	P18206	Vinculin	VCL	sp|P18206|VINC_HUMAN Vinculin OS=Homo sapiens (Human) GN=VCL PE=1 SV=4	---	Cytoskeleton	vinculin/alpha-catenin (actin-associated)	VCL	---	---	---	---	---	---	1	57	56.6	123.8	1134	0	323.31	90856000	52553000	71707000	97970000	12491000	15213000	12436000	15686000	15930000	14819000	5328800	4	1083745	1211400	700710	956090	1306300	6	200210	166550	202830	165810	209150	212410	197590	91318000
980	P18440	P18440	P18440	Arylamine N-acetyltransferase 1	NAT1	sp|P18440|ARY1_HUMAN Arylamine N-acetyltransferase 1 OS=Homo sapiens (Human) GN=NAT1 PE=1 SV=2	---	---	---	---	---	---	---	---	---	---	1	2	7.9	33.898	290	0.00077002	4.4614	592280	218350	225590	203160		62612				67244	91282	4	14798	39485	14557	15039	13544	2	4328.5		4174.1				4482.9	712930
981	P18615	P18615	P18615	Negative elongation factor E	NELFE	sp|P18615|NELFE_HUMAN Negative elongation factor E OS=Homo sapiens (Human) GN=NELFE PE=1 SV=3	---	---	---	---	---	---	---	---	---	---	1	3	13.4	43.239	380	0	11.792		339140				107140	105270		98799	111430	40093	1	17849		17849			4	5589.55		5638.8	5540.3		5200	5864.6
982	P18621	P18621	P18621	60S ribosomal protein L17	RPL17	sp|P18621|RL17_HUMAN 60S ribosomal protein L17 OS=Homo sapiens (Human) GN=RPL17 PE=1 SV=3	---	---	---	---	---	---	---	---	---	---	1	8	42.9	21.397	184	0	103.65	15730000	21748000	18579000	16440000		1170200	904690		1025200		8399600	4	1945450	1747800	2416400	2064300	1826600	3	113920		130020	100520		113920		57201000
983	P18669;Q8N0Y7;P15259	P18669	P18669	Phosphoglycerate mutase 1	PGAM1	sp|P18669|PGAM1_HUMAN Phosphoglycerate mutase 1 OS=Homo sapiens (Human) GN=PGAM1 PE=1 SV=2	---	---	---	---	---	---	---	---	---	---	3	19	75.6	28.804	254	0	323.31	85757000	68248000	77691000	106460000	17520000	31922000	44355000	34664000	24717000	30849000	40168000	4	6286500	6596700	5249800	5976300	8188900	6	2414300	1347700	2455600	3412000	2666500	1901300	2373000	194410000
984	P18754	P18754	P18754	Regulator of chromosome condensation	RCC1	sp|P18754|RCC1_HUMAN Regulator of chromosome condensation OS=Homo sapiens (Human) GN=RCC1 PE=1 SV=1	---	---	---	---	---	---	---	---	---	---	1	6	30.6	44.969	421	0	38.357	304080	1262400	1125100			133530	156490	104420	94133	148890	195830	3	66185	17887	74260	66185		5	7854.5		7854.5	9205.3	6142.3	5537.2	8758	912760
985	P18827	P18827	P18827	Syndecan-1	SDC1	sp|P18827|SDC1_HUMAN Syndecan-1 OS=Homo sapiens (Human) GN=SDC1 PE=1 SV=3	---	ECM	proteoglycan	---	---	---	---	---	---	---	1	2	11.3	32.461	310	0.0005372	5.5608	199850			213180			374370				112480	2	29501.5	28549			30454	1	53481			53481				199850
986	P18858	P18858	P18858	DNA ligase 1	LIG1	sp|P18858|DNLI1_HUMAN DNA ligase 1 OS=Homo sapiens (Human) GN=LIG1 PE=1 SV=1	---	---	---	---	---	---	---	---	---	---	1	2	4	101.73	919	0.0007983	5.3239	77465			117960							3831.9	2	1915.95	1518.9			2313	0
987	P18859	P18859	P18859	ATP synthase-coupling factor 6, mitochondrial	ATP5J	sp|P18859|ATP5J_HUMAN ATP synthase-coupling factor 6, mitochondrial OS=Homo sapiens (Human) GN=ATP5J PE=1 SV=1	FOXO1	---	---	---	---	---	---	---	---	---	1	7	50.9	12.587	108	0	161.29	3689400	1550200	3150400	3706500	4924300	4566300	5239500	5487500	3320700	5752300	8277400	4	683970	737870	310040	630070	741300	6	1016380	984860	913260	1047900	1097500	664140	1150500	20724000
988	P19022	P19022	P19022	Cadherin-2	CDH2	sp|P19022|CADH2_HUMAN Cadherin-2 OS=Homo sapiens (Human) GN=CDH2 PE=1 SV=4	---	#N/A	#N/A	CDH2	---	---	---	---	---	---	1	7	19.3	99.808	906	0	58.472	3920800	1263100	2294500	3521500		196560	290490	367750	279150	302350	336110	4	78594.5	105970	34137	62013	95176	5	7851		5312.4	7851	9939.1	7544.5	8171.6	3328900
989	P19105;P24844	P19105	P19105	Myosin regulatory light chain 12A	MYL12A	sp|P19105|ML12A_HUMAN Myosin regulatory light chain 12A OS=Homo sapiens (Human) GN=MYL12A PE=1 SV=2	---	Cytoskeleton	Myosin	---	---	---	---	---	---	---	2	1	17.5	19.794	171	0.00054333	5.8954	1694600	213380	595080								278120	3	66120	188290	23709	66120		0								7359000
990	P19174	P19174	P19174	1-phosphatidylinositol 4,5-bisphosphate phosphodiesterase gamma-1	PLCG1	sp|P19174|PLCG1_HUMAN 1-phosphatidylinositol 4,5-bisphosphate phosphodiesterase gamma-1 OS=Homo sapiens (Human) GN=PLCG1 PE=1 SV=1	---	---	---	---	---	---	PLCG1	---	---	---	1	7	9.8	148.53	1290	0	52.619	981420	495480	796650	702360							45090	4	11356	14870	7507.3	12070	10642	0								837150
991	P19224;P35504;P22310	P19224	P19224	UDP-glucuronosyltransferase 1-6	UGT1A6	sp|P19224|UD16_HUMAN UDP-glucuronosyltransferase 1-6 OS=Homo sapiens (Human) GN=UGT1A6 PE=1 SV=2	---	---	---	---	UGTs	UGTs	---	---	---	---	3	34	74.8	60.75	532	0	323.31	89854000	136820000	139100000	114810000	28013000	12858000	25668000	19083000	18478000	22036000	23335000	4	4839050	3455900	5262300	5350000	4415800	6	790745	1077400	494540	987230	733970	710700	847520	196780000
992	P19338	P19338	P19338	Nucleolin	NCL	sp|P19338|NUCL_HUMAN Nucleolin OS=Homo sapiens (Human) GN=NCL PE=1 SV=3	---	---	---	---	---	---	---	---	---	---	1	29	34.6	76.613	710	0	323.31	74996000	54079000	83301000	72244000	14671000	15925000	24098000	23687000	17441000	24089000	11558000	4	2103400	2142700	1545100	2380000	2064100	6	587550	419170	455000	688530	676770	498330	688250	73674000
993	P19387	P19387	P19387	DNA-directed RNA polymerase II subunit RPB3	POLR2C	sp|P19387|RPB3_HUMAN DNA-directed RNA polymerase II subunit RPB3 OS=Homo sapiens (Human) GN=POLR2C PE=1 SV=2	---	---	---	---	---	---	---	---	---	---	1	2	10.2	31.441	275	0	27.177		292770			133670	129470	137280	142260	148540	139370	80239	1	20912		20912			6	9880.2	9547.7	9248.2	9805.5	10161	10610	9954.9
994	P19388	P19388	P19388	DNA-directed RNA polymerases I, II, and III subunit RPABC1	POLR2E	sp|P19388|RPAB1_HUMAN DNA-directed RNA polymerases I, II, and III subunit RPABC1 OS=Homo sapiens (Human) GN=POLR2E PE=1 SV=4	---	---	---	---	---	---	---	---	---	---	1	4	41.4	24.551	210	0	22.003	1410200	939170	967880	1337200							423140	4	104774	128200	85379	87989	121560	0								2845900
995	P19404	P19404	P19404	NADH dehydrogenase [ubiquinone] flavoprotein 2, mitochondrial	NDUFV2	sp|P19404|NDUV2_HUMAN NADH dehydrogenase [ubiquinone] flavoprotein 2, mitochondrial OS=Homo sapiens (Human) GN=NDUFV2 PE=1 SV=2	---	---	---	---	---	---	---	---	---	---	1	4	21.7	27.391	249	0	24.238	2278700	1276400	1422600	2305600	142700	133080	161830	155550	142740	137970	543820	4	123380	151920	85096	94840	153700	6	9514.75	9513.3	8872.3	10789	10370	9516.2	9198.2	3934000
996	P19474	P19474	P19474	E3 ubiquitin-protein ligase TRIM21	TRIM21	sp|P19474|RO52_HUMAN E3 ubiquitin-protein ligase TRIM21 OS=Homo sapiens (Human) GN=TRIM21 PE=1 SV=1	---	---	---	---	---	---	---	---	---	---	1	1	2.9	54.169	475	0.0033581	3.1854	187300	82856		199270							17386	3	6937.1	6937.1	3068.7		7380.5	0
997	P19525	P19525	P19525	Interferon-induced, double-stranded RNA-activated protein kinase	EIF2AK2	sp|P19525|E2AK2_HUMAN Interferon-induced, double-stranded RNA-activated protein kinase OS=Homo sapiens (Human) GN=EIF2AK2 PE=1 SV=2	---	---	---	---	---	---	---	---	---	---	1	7	18.5	62.094	551	0	72.852	1186800	329820		245420	205440	245160	147480	217570	284950		136320	3	15706	56514	15706		11687	5	10360	9783	11674	7022.7	10360	13569		1019000
998	P19623	P19623	P19623	Spermidine synthase	SRM	sp|P19623|SPEE_HUMAN Spermidine synthase OS=Homo sapiens (Human) GN=SRM PE=1 SV=1	---	---	---	---	---	---	---	---	---	---	1	11	77.8	33.824	302	0	171.29	2715900	6113100	5532200	3262600	234510	773680	879030	636840	758230	496890	1426900	4	293160	181060	407540	368810	217510	6	46502	15634	51579	58602	42456	50548	33126	5149200
999	P19652	P19652	P19652	Alpha-1-acid glycoprotein 2	ORM2	sp|P19652|A1AG2_HUMAN Alpha-1-acid glycoprotein 2 OS=Homo sapiens (Human) GN=ORM2 PE=1 SV=2	---	---	---	---	---	---	---	---	---	---	1	4	31.3	23.602	201	0	54.574	1770300	1307200	469830	1780900							532830	4	153875	177030	130720	46983	178090	0								2065100
1000	P19784	P19784	P19784	Casein kinase II subunit alpha	CSNK2A2	sp|P19784|CSK22_HUMAN Casein kinase II subunit alpha OS=Homo sapiens (Human) GN=CSNK2A2 PE=1 SV=1	---	#N/A	#N/A	CK2	---	---	---	---	---	---	1	3	11.1	41.213	350	0	95.061		1450800	932310	1005700		194460					188600	3	52934		76360	49069	52934	1	10235		10235
1001	P19793	P19793	P19793	Retinoic acid receptor RXR-alpha	RXRA	sp|P19793|RXRA_HUMAN Retinoic acid receptor RXR-alpha OS=Homo sapiens (Human) GN=RXRA PE=1 SV=1	RXRA;HNF4A	---	---	---	RXRA	---	---	RXRA	RXRA	---	1	3	12.3	50.811	462	0	7.5482	347760	520950	169190	179690							50733	4	10988.5	14490	21706	7049.7	7486.9	0
1002	P19838	P19838	P19838	Nuclear factor NF-kappa-B p105 subunit;Nuclear factor NF-kappa-B p50 subunit	NFKB1	sp|P19838|NFKB1_HUMAN Nuclear factor NF-kappa-B p105 subunit OS=Homo sapiens (Human) GN=NFKB1 PE=1 SV=2	RXRA	---	---	---	NFKB	---	---	NFKB1	NFKB1	---	1	4	6.1	105.35	968	0	35.832	8937200	444220	908430	747900	207730	197790	263940		259140	238330	249070	4	16901	182390	9065.7	18539	15263	5	4864	4239.4	4036.5	5386.4		5288.6	4864	9498600
1003	P19971	P19971	P19971	Thymidine phosphorylase	TYMP	sp|P19971|TYPH_HUMAN Thymidine phosphorylase OS=Homo sapiens (Human) GN=TYMP PE=1 SV=2	---	---	---	---	---	---	---	---	---	---	1	20	54.1	49.955	482	0	323.31	14504000	19243000	19443000	14742000	4335200	4595800	6393500	4898200	4439900	4313000	4037800	4	708015	604320	801770	810120	614260	6	188245	180630	191490	266390	204090	185000	179710	19606000
1004	P20020	P20020	P20020	Plasma membrane calcium-transporting ATPase 1	ATP2B1	sp|P20020|AT2B1_HUMAN Plasma membrane calcium-transporting ATPase 1 OS=Homo sapiens (Human) GN=ATP2B1 PE=1 SV=3	---	---	---	---	---	---	---	---	---	---	1	8	10.9	138.75	1258	0	22.87	1838300	742020	1200300	2567700		308200			203870		131930	4	29216.5	35351	14270	23082	49379	2	4923.75		5926.9			3920.6		1700000
1005	P20042	P20042	P20042	Eukaryotic translation initiation factor 2 subunit 2	EIF2S2	sp|P20042|IF2B_HUMAN Eukaryotic translation initiation factor 2 subunit 2 OS=Homo sapiens (Human) GN=EIF2S2 PE=1 SV=2	---	---	---	---	---	---	---	---	---	---	1	6	32.7	38.388	333	0	68.647	442850	977160	1309800	360740			378980		401070		193530	4	35500.5	22143	48858	65491	18037	2	19501			18949		20053		955710
1006	P20073	P20073	P20073	Annexin A7	ANXA7	sp|P20073|ANXA7_HUMAN Annexin A7 OS=Homo sapiens (Human) GN=ANXA7 PE=1 SV=3	---	---	---	---	---	---	---	---	---	---	1	15	31.1	52.739	488	0	247.42	15069000	19521000	22756000	17943000	4775700	1400400	6117100	3697400	4925100	3442700	4745100	4	891990	717580	929560	1083600	854420	6	201745	227420	66683	291290	176070	234530	163940	20797000
1007	P20290	P20290	P20290	Transcription factor BTF3	BTF3	sp|P20290|BTF3_HUMAN Transcription factor BTF3 OS=Homo sapiens (Human) GN=BTF3 PE=1 SV=1	---	---	---	---	---	---	---	---	---	---	1	9	59.2	22.168	206	0	310.43	11538000	13074000	7196800	10299000	955040	1767200	1858900	646040	2545600	1718000	5159900	4	1091850	1153800	1307400	719680	1029900	6	174260	95504	176720	185890	64604	254560	171800	42006000
1008	P20336	P20336	P20336	Ras-related protein Rab-3A	RAB3A	sp|P20336|RAB3A_HUMAN Ras-related protein Rab-3A OS=Homo sapiens (Human) GN=RAB3A PE=1 SV=1	---	Trafficking	Rab	---	---	---	---	---	---	---	1	1	7.3	24.984	220	0	7.0627	107370	88812		113200							23799	3	8259.1	8259.1	6831.7		8707.9	0								232360
1009	P20338	P20338	P20338	Ras-related protein Rab-4A	RAB4A	sp|P20338|RAB4A_HUMAN Ras-related protein Rab-4A OS=Homo sapiens (Human) GN=RAB4A PE=1 SV=3	---	Trafficking	Rab	---	---	---	---	---	---	---	1	7	50.5	24.389	218	0	50.27	3535200	2484000	2359300	2211700			227320		210870		787740	4	172975	252510	177430	168520	157980	2	15649.5			16237		15062		7209600
1010	P20339	P20339	P20339	Ras-related protein Rab-5A	RAB5A	sp|P20339|RAB5A_HUMAN Ras-related protein Rab-5A OS=Homo sapiens (Human) GN=RAB5A PE=1 SV=2	---	Trafficking	Rab	---	---	---	---	---	---	---	1	5	45.1	23.658	215	0	97.764	5812100	2301100	3369700	5707800							1562800	4	412615	528370	209190	306340	518890	0								10150000
1011	P20340	P20340	P20340	Ras-related protein Rab-6A	RAB6A	sp|P20340|RAB6A_HUMAN Ras-related protein Rab-6A OS=Homo sapiens (Human) GN=RAB6A PE=1 SV=3	---	Trafficking	Rab	---	---	---	---	---	---	---	1	10	55.8	23.593	208	0	58.728	18716000	17462000	18014000	17107000	1718200	178890	207930	215810	178010	186830	5691100	4	1364500	1439700	1343300	1385700	1315900	6	15183.5	132170	13761	15995	16600	13693	14372	56239000
1012	P20585	P20585	P20585	DNA mismatch repair protein Msh3	MSH3	sp|P20585|MSH3_HUMAN DNA mismatch repair protein Msh3 OS=Homo sapiens (Human) GN=MSH3 PE=1 SV=4	---	---	---	---	---	---	---	---	---	---	1	3	5	127.41	1137	0	7.4578	290410			288440							10155	2	5077.55	5094.8			5060.3	0								292350
1013	P20618	P20618	P20618	Proteasome subunit beta type-1	PSMB1	sp|P20618|PSB1_HUMAN Proteasome subunit beta type-1 OS=Homo sapiens (Human) GN=PSMB1 PE=1 SV=2	HNF4A	Degradation	Ubiquitin proteasome system (UPS)	---	---	---	---	---	---	---	1	14	65.6	26.489	241	0	252.31	31957000	14044000	19342000	30745000	754880	891680	1363700	845880	1314100	1930900	7370600	4	1788850	2282600	1003100	1381600	2196100	6	78776.5	53920	63692	97406	60420	93861	137920	67463000
1014	P20645	P20645	P20645	Cation-dependent mannose-6-phosphate receptor	M6PR	sp|P20645|MPRD_HUMAN Cation-dependent mannose-6-phosphate receptor OS=Homo sapiens (Human) GN=M6PR PE=1 SV=1	---	Membrane receptors	Growth factor receptor	---	---	---	---	---	---	---	1	5	28.9	30.993	277	0	64.785	731550	713640	1657500	1042200							296060	4	63348.5	52253	50974	118390	74444	0								1009900
1015	P20674	P20674	P20674	Cytochrome c oxidase subunit 5A, mitochondrial	COX5A	sp|P20674|COX5A_HUMAN Cytochrome c oxidase subunit 5A, mitochondrial OS=Homo sapiens (Human) GN=COX5A PE=1 SV=2	---	---	---	---	---	---	---	---	---	---	1	4	27.3	16.762	150	0	60.51	10420000	7253200	6177900	9089100	2889400	2364600	1552800	1801600	2688100	2813300	3920800	4	680930	868290	604430	514820	757430	6	210525	240790	197050	129400	150140	224000	234440	55264000
1016	P20700	P20700	P20700	Lamin-B1	LMNB1	sp|P20700|LMNB1_HUMAN Lamin-B1 OS=Homo sapiens (Human) GN=LMNB1 PE=1 SV=2	---	---	---	---	---	---	---	---	---	---	1	2	4.3	66.408	586	0.00077801	4.699		176470	166740	167820						331160	24062	3	4794.9		5041.9	4764	4794.9	1	9461.8						9461.8
1017	P20711	P20711	P20711	Aromatic-L-amino-acid decarboxylase	DDC	sp|P20711|DDC_HUMAN Aromatic-L-amino-acid decarboxylase OS=Homo sapiens (Human) GN=DDC PE=1 SV=2	---	---	---	---	---	---	---	---	---	---	1	10	31	53.926	480	0	68.675	8790900	5377800	5992400	2415600	3311800	2852800	273490	240320	281910	263350	1241700	4	236880	366290	224080	249680	100650	6	11570.5	137990	118870	11395	10013	11746	10973	6191900
1018	P20810	P20810	P20810	Calpastatin	CAST	sp|P20810|ICAL_HUMAN Calpastatin OS=Homo sapiens (Human) GN=CAST PE=1 SV=4	---	---	---	---	---	---	---	---	---	---	1	11	27.3	76.572	708	0	120.89	222170	237880	122620	558170	613190	1198400	879190	887300	2553500	2191000	286770	4	6970.4	6732.3	7208.5	3715.9	16914	6	31601	18582	36314	26642	26888	77379	66394
1019	P20815	P20815	P20815	Cytochrome P450 3A5	CYP3A5	sp|P20815|CP3A5_HUMAN Cytochrome P450 3A5 OS=Homo sapiens (Human) GN=CYP3A5 PE=1 SV=1	RXRA	---	---	---	CYP3A5	CYP	---	---	---	---	1	1	2.6	57.108	502	0	11.422			97261	524970						1386300	87328	2	13526.8			4228.7	22825	1	60274						60274
1020	P20823	P20823	P20823	Hepatocyte nuclear factor 1-alpha	HNF1A	sp|P20823|HNF1A_HUMAN Hepatocyte nuclear factor 1-alpha OS=Homo sapiens (Human) GN=HNF1A PE=1 SV=2	GATA4; HNF1A, HNF4A;NFE2L2	---	---	---	---	---	---	---	HNF1A	---	1	1	3	67.356	631	0	32.897		199350	259510	309000							51191	3	17301		13290	17301	20600	0
1021	P20933	P20933	P20933	N(4)-(beta-N-acetylglucosaminyl)-L-asparaginase;Glycosylasparaginase alpha chain;Glycosylasparaginase beta chain	AGA	sp|P20933|ASPG_HUMAN N(4)-(beta-N-acetylglucosaminyl)-L-asparaginase OS=Homo sapiens (Human) GN=AGA PE=1 SV=2	---	---	---	---	---	---	---	---	---	---	1	4	21.7	37.208	346	0	204.51	7124300	4348900	5297400	4994500	1005900	696430	1496700	797060	728320	1531500	1868100	4	343065	474950	289920	353160	332970	6	60098.5	67060	46429	99777	53137	48555	102100	25418000
1022	P20936	P20936	P20936	Ras GTPase-activating protein 1	RASA1	sp|P20936|RASA1_HUMAN Ras GTPase-activating protein 1 OS=Homo sapiens (Human) GN=RASA1 PE=1 SV=1	HNF4A	Trafficking	Ras-associated	---	---	---	---	---	---	---	1	3	5.2	116.4	1047	0	11.078	476570	240780	152980	478010							26438	4	7032.85	9344.5	4721.2	2999.6	9372.8	0								368010
1023	P20962	P20962	P20962	Parathymosin	PTMS	sp|P20962|PTMS_HUMAN Parathymosin OS=Homo sapiens (Human) GN=PTMS PE=1 SV=2	---	---	---	---	---	---	---	---	---	---	1	2	13.7	11.53	102	0	35.718					443470	3822300	4628100	421820		4535000	4616900	0						5	1274100	147820	1274100	1542700	140610		1511700
1024	Q9UQ88;P21127;Q13882	Q9UQ88;P21127	Q9UQ88	Cyclin-dependent kinase 11A;Cyclin-dependent kinase 11B	CDK11A;CDK11B	sp|Q9UQ88|CD11A_HUMAN Cyclin-dependent kinase 11A OS=Homo sapiens (Human) GN=CDK11A PE=1 SV=4;sp|P21127|CD11B_HUMAN Cyclin-dependent kinase 11B OS=Homo sapiens (Human) GN=CDK11B PE=1 SV=3	---	---	---	---	---	---	---	---	---	---	3	5	6.9	91.361	783	0	11.923	856300	341550	442920	1539600							81548	4	16656.5	21956	8757.6	11357	39477	0								897740
1025	P21266	P21266	P21266	Glutathione S-transferase Mu 3	GSTM3	sp|P21266|GSTM3_HUMAN Glutathione S-transferase Mu 3 OS=Homo sapiens (Human) GN=GSTM3 PE=1 SV=3	---	---	---	---	GSTs	GST	---	---	---	---	1	1	7.1	26.559	225	0.0093203	2.3195	141360		144800								16833	2	8416.35	8315		8517.7		0								305910
1026	P21281;P15313	P21281	P21281	V-type proton ATPase subunit B, brain isoform	ATP6V1B2	sp|P21281|VATB2_HUMAN V-type proton ATPase subunit B, brain isoform OS=Homo sapiens (Human) GN=ATP6V1B2 PE=1 SV=3	---	---	---	---	---	---	---	---	---	---	2	16	56.9	56.5	511	0	144.75	3934400	8355200	5352500	3076100	964410	1611200	1137200	857530	740740	1708300	1109500	4	185740	157380	334210	214100	123040	6	42032	38576	64449	45488	34301	29629	68332	4958100
1027	P21283	P21283	P21283	V-type proton ATPase subunit C 1	ATP6V1C1	sp|P21283|VATC1_HUMAN V-type proton ATPase subunit C 1 OS=Homo sapiens (Human) GN=ATP6V1C1 PE=1 SV=4	---	---	---	---	---	---	---	---	---	---	1	8	26.7	43.941	382	0	83.999	1218900	1735200	615080	657100	106670	419150	507440	124580	463110	139100	221710	4	34740	45143	64266	22781	24337	6	10338	3950.7	15524	18794	4614.1	17152	5152	1441400
1028	P21291	P21291	P21291	Cysteine and glycine-rich protein 1	CSRP1	sp|P21291|CSRP1_HUMAN Cysteine and glycine-rich protein 1 OS=Homo sapiens (Human) GN=CSRP1 PE=1 SV=3	---	---	---	---	---	---	---	---	---	---	1	7	50.3	20.567	193	0	111.7	6595600	6689700	7723900	6316700	1823200	2201700	2419000	992460	2359600	1350200	3206000	4	553550	549630	557470	643660	526390	6	167700	151930	183470	201590	82705	196630	112510	24568000
1029	P21333	P21333	P21333	Filamin-A	FLNA	sp|P21333|FLNA_HUMAN Filamin-A OS=Homo sapiens (Human) GN=FLNA PE=1 SV=4	HNF4A	---	---	---	---	---	---	---	---	---	1	42	31.7	280.74	2647	0	323.31	8034300	5782200	3786700	8958200	5409800	5970900	6531200	6518500	6745700	6020000	475800	4	51554.5	59958	43151	28259	66852	6	46785	40372	44559	48740	48645	50341	44925	8070400
1030	P21397	P21397	P21397	Amine oxidase [flavin-containing] A	MAOA	sp|P21397|AOFA_HUMAN Amine oxidase [flavin-containing] A OS=Homo sapiens (Human) GN=MAOA PE=1 SV=1	---	---	---	---	MAO	---	---	---	---	---	1	21	55	59.681	527	0	282.96	27756000	34825000	41054000	27987000	7525200	7901600	2983600	2189400	3075300	6308200	5771600	4	1121670	991270	1243800	1466200	999540	6	167560	268760	282200	106560	78192	109830	225290	33607000
1031	P21399	P21399	P21399	Cytoplasmic aconitate hydratase	ACO1	sp|P21399|ACOC_HUMAN Cytoplasmic aconitate hydratase OS=Homo sapiens (Human) GN=ACO1 PE=1 SV=3	---	---	---	---	---	---	---	---	---	---	1	31	48.6	98.398	889	0	323.31	39164000	34791000	40793000	36106000	4776100	3703300	3710900	5824800	6026100	3780400	4254200	4	896080	932480	828350	971260	859680	6	101864	113720	88173	88356	138690	143480	90009	41097000
1032	P21549	P21549	P21549	Serine--pyruvate aminotransferase	AGXT	sp|P21549|SPYA_HUMAN Serine--pyruvate aminotransferase OS=Homo sapiens (Human) GN=AGXT PE=1 SV=1	PPARA	---	---	---	---	---	---	---	---	---	1	21	63.5	43.009	392	0	323.31	52376000	55291000	67944000	49756000	6080900	8544200	9214400	5743700	6658900	7892100	12833000	4	2563500	2494100	2632900	3235400	2369300	6	346450	289560	406870	438780	273510	317090	375810	83051000
1033	P21589	P21589	P21589	5-nucleotidase	NT5E	sp|P21589|5NTD_HUMAN 5-nucleotidase OS=Homo sapiens (Human) GN=NT5E PE=1 SV=1	FOXO3	---	---	---	---	---	---	---	---	---	1	4	12.9	63.367	574	0	13.888	161540	268820	251970	362990	153190	127620	133750	152010	134900	141830	69949	4	9644.3	5982.9	9956.4	9332.2	13444	6	5124.75	5673.9	4726.7	4953.7	5629.9	4996.4	5253.1
1034	P21695	P21695	P21695	Glycerol-3-phosphate dehydrogenase [NAD(+)], cytoplasmic	GPD1	sp|P21695|GPDA_HUMAN Glycerol-3-phosphate dehydrogenase [NAD(+)], cytoplasmic OS=Homo sapiens (Human) GN=GPD1 PE=1 SV=4	RXRA	---	---	---	---	---	---	---	---	---	1	20	80.2	37.567	349	0	275.69	24661000	29293000	26726000	19200000	6789400	4722100	9599700	3669700	5838900	4833300	6151500	4	1167900	1121000	1331500	1214800	872740	6	242545	308610	214640	436350	166810	265400	219690	39616000
1035	P21796	P21796	P21796	Voltage-dependent anion-selective channel protein 1	VDAC1	sp|P21796|VDAC1_HUMAN Voltage-dependent anion-selective channel protein 1 OS=Homo sapiens (Human) GN=VDAC1 PE=1 SV=2	---	---	---	---	---	---	---	---	---	---	1	12	59	30.772	283	0	284.09	4316000	9758700	11322000	8549900	1521500	1134800	436730	1327900	577040	1537100	2381300	4	538490	253880	574040	666020	502940	6	72433.5	89503	66756	25690	78111	33944	90420	12438000
1036	P21912	P21912	P21912	Succinate dehydrogenase [ubiquinone] iron-sulfur subunit, mitochondrial	SDHB	sp|P21912|SDHB_HUMAN Succinate dehydrogenase [ubiquinone] iron-sulfur subunit, mitochondrial OS=Homo sapiens (Human) GN=SDHB PE=1 SV=3	---	---	---	---	---	---	---	---	---	---	1	7	34.6	31.629	280	0	206.9	8216000	8898300	9959700	6732700	2352500	509140	2688700	169990	1259600	73408	2270000	4	475395	456440	494350	553320	374040	6	49131	130700	28286	149370	9443.6	69976	4078.2	19094000
1037	P21926	P21926	P21926	CD9 antigen	CD9	sp|P21926|CD9_HUMAN CD9 antigen OS=Homo sapiens (Human) GN=CD9 PE=1 SV=4	---	---	---	---	---	---	---	---	---	---	1	1	11	25.416	228	0	44.974	1574100	582070	616250	974470	483440			562140			798750	4	132560	262350	97012	102710	162410	2	87132	80573			93691			2564400
1038	P21953	P21953	P21953	2-oxoisovalerate dehydrogenase subunit beta, mitochondrial	BCKDHB	sp|P21953|ODBB_HUMAN 2-oxoisovalerate dehydrogenase subunit beta, mitochondrial OS=Homo sapiens (Human) GN=BCKDHB PE=1 SV=2	---	---	---	---	---	---	---	---	---	---	1	11	51.8	43.122	392	0	67.048	1914800	2278800	5517300	2151300	503070	1816700	1612600	1339600	1537300	1752200	1276500	4	138440	119680	142420	344830	134460	6	98435	31442	113550	100790	83722	96080	109510	2904800
1039	P21964	P21964	P21964	Catechol O-methyltransferase	COMT	sp|P21964|COMT_HUMAN Catechol O-methyltransferase OS=Homo sapiens (Human) GN=COMT PE=1 SV=2	---	---	---	---	---	---	---	---	---	---	1	13	62.7	30.037	271	0	277.18	8467500	11504000	13566000	10010000	879470	745300	1379800	1274700	1602500	999310	3361900	4	717110	564500	766920	904430	667300	6	75800	58631	49687	91989	84979	106830	66621	25105000
1040	P21980;P49221	P21980	P21980	Protein-glutamine gamma-glutamyltransferase 2	TGM2	sp|P21980|TGM2_HUMAN Protein-glutamine gamma-glutamyltransferase 2 OS=Homo sapiens (Human) GN=TGM2 PE=1 SV=2	---	---	---	---	---	---	---	---	---	---	2	38	72.8	77.328	687	0	323.31	68295000	67755000	69061000	69932000	13860000	12716000	14601000	13109000	9277200	10323000	10263000	4	2019950	2008700	1992800	2031200	2056800	6	379785	407640	374000	429450	385570	272860	303620	75145000
1041	P22033	P22033	P22033	Methylmalonyl-CoA mutase, mitochondrial	MUT	sp|P22033|MUTA_HUMAN Methylmalonyl-CoA mutase, mitochondrial OS=Homo sapiens (Human) GN=MUT PE=1 SV=4	---	---	---	---	---	---	---	---	---	---	1	23	51.2	83.134	750	0	323.31	21717000	22694000	22981000	20123000	4863000	5141900	4701400	3783900	6927800	3167900	3137900	4	600155	586960	613350	621110	543880	6	129250	131430	138970	127070	102270	187240	85619	24104000
1042	P22059;Q969R2	P22059	P22059	Oxysterol-binding protein 1	OSBP	sp|P22059|OSBP1_HUMAN Oxysterol-binding protein 1 OS=Homo sapiens (Human) GN=OSBP PE=1 SV=1	SREBF1	---	---	---	---	---	---	---	---	---	2	17	34.2	89.42	807	0	264.81	7955400	8794600	10615000	8981000	781600	1018100	929050	806620		1037000	998000	4	216775	194030	214500	258890	219050	5	22660	19063	24832	22660	19674		25291	6369000
1043	P22061	P22061	P22061	Protein-L-isoaspartate(D-aspartate) O-methyltransferase	PCMT1	sp|P22061|PIMT_HUMAN Protein-L-isoaspartate(D-aspartate) O-methyltransferase OS=Homo sapiens (Human) GN=PCMT1 PE=1 SV=4	---	---	---	---	---	---	---	---	---	---	1	6	44.9	24.636	227	0	49.495	9686700	6609000	7591200	9071900	1125200	1246900	1416500		520530	1448600	3226400	4	694295	807220	550750	632600	755990	5	103900	93765	103900	118040		43377	120720	22061000
1044	P22087	P22087	P22087	rRNA 2-O-methyltransferase fibrillarin	FBL	sp|P22087|FBRL_HUMAN rRNA 2-O-methyltransferase fibrillarin OS=Homo sapiens (Human) GN=FBL PE=1 SV=2	---	---	---	---	---	---	---	---	---	---	1	6	22.4	33.784	321	0	69.944	1669000	664490	1006100			989970			1041000	591910	313820	3	52952	87844	34973	52952		3	52104		52104			54789	31153	2216600
1045	P22102	P22102	P22102	Trifunctional purine biosynthetic protein adenosine-3;Phosphoribosylamine--glycine ligase;Phosphoribosylformylglycinamidine cyclo-ligase;Phosphoribosylglycinamide formyltransferase	GART	sp|P22102|PUR2_HUMAN Trifunctional purine biosynthetic protein adenosine-3 OS=Homo sapiens (Human) GN=GART PE=1 SV=1	---	---	---	---	---	---	---	---	---	---	1	19	34.2	107.77	1010	0	119.77	5217200	4515600	6347700	4848000	2024700	2471800	2023500	2259800	2393500	3694000	745750	4	104845	108690	94075	132240	101000	6	48471.5	42182	51497	42157	47079	49864	76958	5734400
1046	P22234	P22234	P22234	Multifunctional protein ADE2;Phosphoribosylaminoimidazole-succinocarboxamide synthase;Phosphoribosylaminoimidazole carboxylase	PAICS	sp|P22234|PUR6_HUMAN Multifunctional protein ADE2 OS=Homo sapiens (Human) GN=PAICS PE=1 SV=3	---	---	---	---	---	---	---	---	---	---	1	19	64.5	47.079	425	0	132.45	8788200	8310100	9599900	5812200	4994200	4261000	5339000	4457500	4005300	6252400	3253700	4	449955	462540	437370	505260	305900	6	248725	262850	224260	281000	234600	210800	329070	14832000
1047	P22307	P22307	P22307	Non-specific lipid-transfer protein	SCP2	sp|P22307|NLTP_HUMAN Non-specific lipid-transfer protein OS=Homo sapiens (Human) GN=SCP2 PE=1 SV=2	---	---	---	---	---	---	---	---	SCP2	---	1	31	65.8	58.993	547	0	323.31	99168000	114870000	134100000	133450000	19954000	28578000	30215000	26429000	18648000	28676000	25364000	4	4966450	3966700	4594800	5363900	5338100	6	1100150	798140	1143100	1208600	1057200	745920	1147100	456540000
1048	P22309	P22309	P22309	UDP-glucuronosyltransferase 1-1	UGT1A1	sp|P22309|UD11_HUMAN UDP-glucuronosyltransferase 1-1 OS=Homo sapiens (Human) GN=UGT1A1 PE=1 SV=1	---	---	---	---	UGTs	UGTs	---	---	---	---	1	7	21.6	59.591	533	0	104.07	4412200	5572100	8989300	6093600	168920	116850	116820	166920	118750	112990	1437100	4	324050	245120	309560	499400	338540	6	6544.55	9384.6	6491.9	6490.2	9273.2	6597.2	6277	7873100
1049	P22314	P22314	P22314	Ubiquitin-like modifier-activating enzyme 1	UBA1	sp|P22314|UBA1_HUMAN Ubiquitin-like modifier-activating enzyme 1 OS=Homo sapiens (Human) GN=UBA1 PE=1 SV=3	---	---	---	---	---	---	---	---	---	---	1	57	73.3	117.85	1058	0	323.31	192730000	108700000	167500000	151870000	36146000	38816000	34387000	44110000	38298000	38958000	15769000	4	2957200	3569000	2012900	3101900	2812500	6	714020	669380	718810	636800	816850	709230	721440	173640000
1050	P22392;O60361	P22392;O60361	P22392	Nucleoside diphosphate kinase B;Putative nucleoside diphosphate kinase	NME2;NME2P1	sp|P22392|NDKB_HUMAN Nucleoside diphosphate kinase B OS=Homo sapiens (Human) GN=NME2 PE=1 SV=1;sp|O60361|NDK8_HUMAN Putative nucleoside diphosphate kinase OS=Homo sapiens (Human) GN=NME2P1 PE=5 SV=1	---	---	---	---	---	---	---	---	---	---	2	4	30.9	17.298	152	0	85.699	41219000	44609000	34547000	29410000	147900	2758900	3330600	575030	5215700	5021200	15167000	4	3443900	3747200	4055400	3140600	2673600	6	276795	13446	250810	302780	52276	474150	456470	136320000
1051	P22413	P22413	P22413	Ectonucleotide pyrophosphatase/phosphodiesterase family member 1;Alkaline phosphodiesterase I;Nucleotide pyrophosphatase	ENPP1	sp|P22413|ENPP1_HUMAN Ectonucleotide pyrophosphatase/phosphodiesterase family member 1 OS=Homo sapiens (Human) GN=ENPP1 PE=1 SV=2	---	---	---	---	---	---	---	---	---	---	1	6	14.8	104.92	925	0	35.113	1632200	467870	746340	1089200							93705	4	21851.5	38862	11140	17770	25933	0								1328200
1052	P22570	P22570	P22570	NADPH:adrenodoxin oxidoreductase, mitochondrial	FDXR	sp|P22570|ADRO_HUMAN NADPH:adrenodoxin oxidoreductase, mitochondrial OS=Homo sapiens (Human) GN=FDXR PE=1 SV=3	---	---	---	---	---	---	---	---	---	---	1	19	48.7	53.836	491	0	318.45	9770600	14244000	13794000	12919000	2181500	5536700	6317500	3981400	6442100	6236400	2626500	4	430845	315180	459470	444960	416730	6	189890	70371	178600	203790	128430	207810	201180	17817000
1053	P22612	P22612	P22612	cAMP-dependent protein kinase catalytic subunit gamma	PRKACG	sp|P22612|KAPCG_HUMAN cAMP-dependent protein kinase catalytic subunit gamma OS=Homo sapiens (Human) GN=PRKACG PE=1 SV=3	---	#N/A	#N/A	PKA	---	---	---	---	PKA	PKA	1	1	6.8	40.434	351	0	8.7197			2274700								142170	1	142170			142170		0
1054	P22626	P22626	P22626	Heterogeneous nuclear ribonucleoproteins A2/B1	HNRNPA2B1	sp|P22626|ROA2_HUMAN Heterogeneous nuclear ribonucleoproteins A2/B1 OS=Homo sapiens (Human) GN=HNRNPA2B1 PE=1 SV=2	---	---	---	---	---	---	---	---	---	---	1	19	60.9	37.429	353	0	323.31	34321000	32193000	40458000	24447000	8875600	8183600	7574300	10308000	11487000	10693000	9427000	4	1662800	1716000	1609600	2022900	1222300	6	479580	443780	409180	378720	515380	574370	534660	64053000
[truncated: 3,378 more rows]
[truncated: 20 more columns]

## Sheet: Loess-G normalized copyN°
Table S5B. Comparsion of Loess-G normalized copy N° for 3995 proteins analysed in HepaRG cells, PHH and HepG2 (intracellular proteome)
[truncated: 3,998 more rows]
[truncated: 16 more columns]

[truncated: 1 more sheets: Secretome data]
