# Supplementary material for: In-Depth Proteome Analysis Highlights HepaRG Cells as a Versatile Cell System Surrogate for Primary Human Hepatocytes
Source: Cells. 2019 Feb 21;8(2):192. doi: 10.3390/cells8020192 (PMC6406872; doi:10.3390/cells8020192)
Supplement: Supplementary file 1 [file cells-08-00192-s001.zip › Table S6_revised2.xlsx]

## Sheet: Table S6. Title
In-depth proteome analysis highlights HepaRG cells as a versatile cell system surrogate to primary human hepatocytes
Georg Tascher, Audrey Burban, Sandrine Camus, Marine Plumel, Stéphanie Chanon, Remy Le Guevel, Valery Shevchenko, Alain Van Dorsselaer, Etienne Lefai, Christiane Guguen-Guillouzo and Fabrice Bertile
Table S6. 1D and 2D annotation enrichment analyses using protein copy no ratios (log10) among the three cell systems.
On the three following Excel sheets are presented :
	Table S6-1. 1D annotation Enrichment analysis using protein copy no ratios (log10) between HepaRG cells and PHH
	Table S6-2. 1D annotation Enrichment analysis using protein copy no ratios (log10) between HepG2 cells and PHH
	Table S6-3. 2D annotation enrichment analysis using protein copy no ratios (log10) between HepaRG cells vs PHH and HepG2 cells vs PHH

## Sheet: 1D aE HRGvsPHH
Table S6-1. 1D annotation Enrichment analysis using protein copy no ratios (log10) between HepaRG cells and PHH
Only annotations with a BH-FDR < 2% were retained
Type	Name	Size	Score	P value	Benj. Hoch. FDR	Mean	Median
GOCC name	extracellular exosome	1315	0.144748	1.07656e-13	1.20683e-10	0.191582	0.093781
GOCC name	integral component of membrane	577	-0.182281	2.39497e-12	1.34238e-09	-0.1295	-0.214517
KEGG name	Non-alcoholic fatty liver disease (NAFLD)	77	-0.350656	1.31439e-07	3.9826e-05	-0.304502	-0.381587
GOCC name	endoplasmic reticulum membrane	316	-0.167737	7.27749e-07	0.000271935	-0.117505	-0.188117
GOCC name	mitochondrial respiratory chain complex I	35	-0.481584	9.00086e-07	0.000252249	-0.482168	-0.496678
GOMF name	monooxygenase activity	21	-0.61098	1.32456e-06	0.00322265	-0.818443	-0.81243
GOMF name	NADH dehydrogenase (ubiquinone) activity	34	-0.480901	1.32892e-06	0.00161664	-0.480718	-0.511117
GOCC name	membrane	1732	-0.0888983	1.52542e-06	0.000341999	-0.00435511	-0.0710785
GOBP name	mitochondrial electron transport, NADH to ubiquinone	36	-0.452535	2.85643e-06	0.0188953	-0.415974	-0.494335
GOBP name	oxidation-reduction process	343	-0.148379	5.40183e-06	0.0178666	-0.0487516	-0.165713
GOCC name	respiratory chain	46	-0.381417	8.42857e-06	0.00157474	-0.315504	-0.442983
KEGG name	Drug metabolism - cytochrome P450	40	-0.403657	1.08791e-05	0.00164819	-0.437468	-0.494754
KEGG level_2	Endocrine and metabolic diseases	92	-0.256782	2.49048e-05	0.001046	-0.179625	-0.316995
GOCC name	organelle membrane	42	-0.377128	2.55109e-05	0.00408538	-0.435142	-0.456919
Chromosome	7	185	0.182678	2.65204e-05	0.00119342	0.235945	0.154616
GOCC name	focal adhesion	247	0.157012	3.49947e-05	0.00490363	0.271395	0.10621
KEGG level_2	Xenobiotics biodegradation and metabolism	67	-0.291449	4.19597e-05	0.000881154	-0.267975	-0.380168
GOCC name	cytosol	1444	0.0749593	8.38144e-05	0.0104395	0.119243	0.0237379
GOCC name	nucleus	1589	0.073437	8.70299e-05	0.00975605	0.100441	-0.0103788
GOCC name	extracellular matrix	103	0.224734	9.68646e-05	0.00987139	0.370689	0.212563
KEGG level_2	Membrane transport	10	-0.694689	0.000144879	0.00202831	-0.663954	-0.521825
KEGG level_1	Metabolism	780	-0.0726316	0.00164132	0.00984794	0.0204037	-0.0944228

## Sheet: 1D aE HepG2vsPHH
Table S6-2. 1D annotation Enrichment analysis using protein copy no ratios (log10) between HepG2 cells and PHH
Only annotations with a BH-FDR < 2% were retained
Type	Name	Size	Score	P value	Benj. Hoch. FDR	Mean	Median
GOMF name	poly(A) RNA binding	662	0.444109	6.20594e-71	1.50991e-67	0.334132	0.36826
KEGG level_1	Genetic Information Processing	677	0.357469	2.29189e-47	1.37513e-46	0.247266	0.311527
GOCC name	intracellular ribonucleoprotein complex	233	0.494739	1.39033e-36	1.55856e-33	0.404974	0.398585
GOCC name	nucleoplasm	872	0.284045	2.89772e-36	1.62417e-33	0.176928	0.251462
GOMF name	RNA binding	392	0.375549	7.33364e-34	8.92137e-31	0.290943	0.348479
GOBP name	mRNA splicing, via spliceosome	142	0.560129	1.03306e-29	6.8337e-26	0.48139	0.511618
GOCC name	nucleus	1444	0.218742	3.39578e-28	1.26889e-25	0.097089	0.170803
KEGG level_2	Translation	301	0.37688	2.68367e-27	1.12714e-25	0.293016	0.34374
GOBP name	mRNA processing	172	0.481034	1.70635e-26	5.64375e-23	0.403211	0.466798
KEGG level_2	Transcription	116	0.553172	3.50975e-24	7.37047e-23	0.467122	0.486139
KEGG level_1	Metabolism	655	-0.251712	9.02464e-24	2.70739e-23	-0.310566	-0.202832
GOCC name	ribosome	143	0.490709	2.48962e-23	6.97716e-21	0.401606	0.367061
GOCC name	nucleolus	306	0.343935	2.50659e-23	5.61977e-21	0.288564	0.34953
GOBP name	RNA splicing	147	0.482379	3.68178e-23	8.11832e-20	0.407733	0.472869
GOBP name	rRNA processing	131	0.502474	1.50745e-22	2.49294e-19	0.446227	0.391555
GOMF name	DNA binding	235	0.36657	5.59404e-21	4.53676e-18	0.318359	0.426022
GOMF name	nucleic acid binding	210	0.385892	6.13417e-21	3.73111e-18	0.341444	0.403192
GOMF name	structural constituent of ribosome	125	0.488651	1.54508e-20	7.51834e-18	0.403728	0.363187
KEGG name	Spliceosome	94	0.551397	6.70509e-20	2.03164e-17	0.466709	0.493098
GOCC name	spliceosomal complex	89	0.5586	2.08256e-19	3.89092e-17	0.487338	0.518519
GOBP name	translation	225	0.33591	3.19683e-17	4.22941e-14	0.270524	0.320483
KEGG name	Ribosome	107	0.46622	1.99434e-16	3.02142e-14	0.381394	0.365608
KEGG level_2	Global and overview maps	520	-0.223447	4.01025e-16	5.61434e-15	-0.298539	-0.160953
GOCC name	catalytic step 2 spliceosome	59	0.616278	4.36138e-16	6.98444e-14	0.535623	0.550803
GOBP name	mitochondrial translational elongation	66	0.581052	5.63023e-16	6.20733e-13	0.50334	0.533184
KEGG level_2	Amino acid metabolism	145	-0.392876	1.05402e-15	1.10672e-14	-0.586962	-0.465849
KEGG name	Metabolic pathways	510	-0.221635	1.16842e-15	1.18011e-13	-0.296997	-0.160953
GOBP name	mitochondrial translational termination	65	0.570407	3.0359e-15	2.86892e-12	0.493087	0.538688
GOMF name	oxidoreductase activity	224	-0.296088	1.14258e-13	4.63317e-11	-0.40124	-0.321459
GOCC name	nuclear speck	78	0.484466	2.3654e-13	3.31452e-11	0.415536	0.465559
KEGG level_2	Carbohydrate metabolism	179	-0.320538	4.71365e-13	3.95947e-12	-0.421945	-0.383218
GOBP name	oxidation-reduction process	281	-0.256204	9.95824e-13	8.23422e-10	-0.328366	-0.20294
GOMF name	protein binding	1790	0.138716	1.41283e-12	4.91058e-10	0.0367503	0.105609
GOBP name	metabolic process	196	-0.299986	1.60116e-12	1.17685e-09	-0.386722	-0.345192
GOBP name	viral transcription	93	0.425565	2.35445e-12	1.55747e-09	0.339255	0.347445
GOBP name	mRNA export from nucleus	64	0.490262	1.70196e-11	1.0235e-08	0.420738	0.462986
GOCC name	chromosome	84	0.42515	2.62622e-11	3.2711e-09	0.369315	0.462986
KEGG level_2	Xenobiotics biodegradation and metabolism	41	-0.601345	3.38245e-11	2.36771e-10	-1.16918	-0.8329
GOMF name	metal ion binding	631	-0.168349	3.43846e-11	1.04572e-08	-0.21542	-0.101377
GOBP name	transcription, DNA-templated	264	0.242259	5.63414e-11	3.10582e-08	0.179708	0.325891
GOMF name	catalytic activity	221	-0.262167	6.50341e-11	1.75809e-08	-0.363936	-0.235769
GOBP name	mRNA transport	60	0.461477	8.41627e-10	4.28259e-07	0.449135	0.458875
GOBP name	regulation of transcription, DNA-templated	273	0.219845	1.55184e-09	7.33245e-07	0.158753	0.303006
GOCC name	extracellular matrix	94	0.364423	1.58355e-09	1.77516e-07	0.305983	0.35472
KEGG name	Drug metabolism - cytochrome P450	22	-0.737131	2.39201e-09	1.81195e-07	-1.46296	-1.32242
GOBP name	mRNA 3'-end processing	36	0.575824	2.64475e-09	1.16634e-06	0.511918	0.558327
GOBP name	nucleosome assembly	21	0.751401	2.76149e-09	1.14171e-06	0.697418	0.715451
GOCC name	nuclear chromosome, telomeric region	49	0.48979	3.73356e-09	3.80484e-07	0.471503	0.523066
GOBP name	ribosome biogenesis	36	0.564589	5.34321e-09	2.07914e-06	0.536626	0.595221
GOBP name	RNA export from nucleus	36	0.564081	5.51416e-09	2.02646e-06	0.502935	0.53445
GOBP name	gene expression	33	0.588179	5.75724e-09	2.00443e-06	0.651235	0.52995
GOCC name	mitochondrial matrix	194	-0.248395	5.80806e-09	5.4257e-07	-0.324986	-0.181081
GOBP name	SRP-dependent cotranslational protein targeting to membrane	82	0.374309	6.61584e-09	2.18819e-06	0.300389	0.31204
KEGG name	Chemical carcinogenesis	25	-0.670576	7.22412e-09	4.37782e-07	-1.18297	-0.814881
GOBP name	termination of RNA polymerase II transcription	40	0.529964	7.87226e-09	2.47976e-06	0.474455	0.525377
KEGG level_2	Metabolism of cofactors and vitamins	84	-0.365486	1.00055e-08	6.00327e-08	-0.626999	-0.404641
GOCC name	peroxisome	62	-0.418052	1.60778e-08	1.3864e-06	-0.496652	-0.523728
KEGG name	Metabolism of xenobiotics by cytochrome P450	23	-0.679038	1.89816e-08	9.58568e-07	-1.17596	-0.814881
GOBP name	protein sumoylation	48	0.469903	2.15576e-08	6.48199e-06	0.412926	0.458875
KEGG name	Peroxisome	50	-0.459382	2.33849e-08	1.01223e-06	-0.577694	-0.582768
GOCC name	mitochondrial large ribosomal subunit	21	0.69738	3.43339e-08	2.74917e-06	0.625473	0.593227
GOBP name	fatty acid metabolic process	67	-0.386324	5.85015e-08	1.68255e-05	-0.527111	-0.504694
GOBP name	DNA replication	40	0.492369	8.24075e-08	2.27136e-05	0.499922	0.627656
KEGG name	RNA transport	101	0.310163	1.04178e-07	3.94576e-06	0.26615	0.258768
KEGG name	Valine, leucine and isoleucine degradation	40	-0.484767	1.29894e-07	4.3731e-06	-0.560658	-0.53047
GOCC name	preribosome, large subunit precursor	19	0.696619	1.56935e-07	1.17283e-05	0.675629	0.679969
GOMF name	mRNA binding	59	0.39529	1.85335e-07	4.50921e-05	0.362756	0.389282
GOMF name	transferase activity	342	-0.171029	1.97812e-07	4.37524e-05	-0.234488	-0.15884
GOBP name	translational initiation	114	0.284939	2.19901e-07	5.81858e-05	0.22797	0.279891
GOMF name	chromatin binding	79	0.338348	2.62439e-07	5.32095e-05	0.286589	0.441986
GOBP name	gene silencing by RNA	53	0.409776	2.94642e-07	7.49637e-05	0.346976	0.452962
GOBP name	nuclear-transcribed mRNA catabolic process, nonsense-mediated decay	86	0.316485	5.17847e-07	0.000126873	0.249931	0.30923
KEGG name	DNA replication	19	0.660579	6.59544e-07	1.99842e-05	0.855747	0.939027
GOCC name	mitochondrion	776	-0.116913	6.63587e-07	4.64926e-05	-0.14015	-0.0684111
KEGG level_2	Lipid metabolism	124	-0.259973	8.50891e-07	4.46718e-06	-0.426898	-0.276979
GOBP name	xenobiotic metabolic process	24	-0.578197	1.01598e-06	0.000240025	-0.970575	-0.688501
GOBP name	positive regulation of gene expression, epigenetic	18	0.666988	1.01895e-06	0.000232426	0.625354	0.733229
GOCC name	cytosolic large ribosomal subunit	49	0.396891	1.77604e-06	0.000117114	0.337971	0.311527
GOCC name	endosome	172	-0.21513	1.89942e-06	0.000118292	-0.234151	-0.159954
GOBP name	transcription from RNA polymerase II promoter	66	0.33972	2.20081e-06	0.000485278	0.31482	0.408921
GOBP name	tRNA export from nucleus	25	0.548573	2.21218e-06	0.000472051	0.454783	0.461253
GOMF name	helicase activity	56	0.366635	2.44023e-06	0.000456699	0.314155	0.434644
KEGG name	Tryptophan metabolism	24	-0.556665	2.52049e-06	6.94282e-05	-0.782017	-0.670524
GOCC name	small-subunit processome	14	0.723353	2.90033e-06	0.00017112	0.700372	0.688112
GOCC name	mitochondrial small ribosomal subunit	22	0.577173	2.96171e-06	0.000166004	0.498388	0.42785
KEGG name	Ribosome biogenesis in eukaryotes	37	0.445251	3.0811e-06	7.77978e-05	0.386168	0.485741
GOMF name	unfolded protein binding	57	0.35611	3.87856e-06	0.000674038	0.301285	0.384642
KEGG name	Retinol metabolism	17	-0.644851	4.36432e-06	0.000101722	-1.45117	-1.32619
GOBP name	transcription elongation from RNA polymerase II promoter	30	0.483546	4.95114e-06	0.00102349	0.409488	0.41907
GOBP name	maturation of SSU-rRNA from tricistronic rRNA transcript (SSU-rRNA, 5.8S rRNA, LSU-rRNA)	14	0.703137	5.44115e-06	0.0010907	0.673367	0.708174
KEGG name	Cell cycle	33	0.4588	5.55495e-06	0.000120225	0.483872	0.414992
Chromosome	20	99	0.267236	5.65672e-06	0.000254552	0.210094	0.276479
GOMF name	flavin adenine dinucleotide binding	34	-0.45077	5.90933e-06	0.000958494	-0.582108	-0.511064
GOBP name	negative regulation of mRNA splicing, via spliceosome	15	0.672804	6.7025e-06	0.00130403	0.564985	0.599099
GOMF name	pyridoxal phosphate binding	28	-0.492116	7.07252e-06	0.00107547	-0.797682	-0.691665
GOBP name	viral process	199	0.188386	7.86722e-06	0.0014869	0.137619	0.169622
GOMF name	rRNA binding	23	0.537599	8.57871e-06	0.00122776	0.489513	0.409318
GOMF name	lyase activity	60	-0.333704	9.09236e-06	0.00122898	-0.498858	-0.347123
KEGG name	Fatty acid degradation	34	-0.440306	9.66841e-06	0.000195302	-0.605029	-0.443956
KEGG level_2	Replication and repair	49	0.365806	1.06666e-05	4.97777e-05	0.409435	0.414676
GOMF name	RNA polymerase II distal enhancer sequence-specific DNA binding	14	0.67921	1.12162e-05	0.00143627	0.629219	0.615104
KEGG level_2	Metabolism of other amino acids	61	-0.326982	1.16649e-05	4.89925e-05	-0.440863	-0.412518
KEGG name	Arginine and proline metabolism	34	-0.43597	1.18195e-05	0.000223832	-0.643281	-0.46458
GOBP name	RNA processing	48	0.367036	1.22371e-05	0.00224857	0.318534	0.422824
GOBP name	positive regulation of telomerase RNA localization to Cajal body	11	0.760109	1.30681e-05	0.00233637	0.64861	0.662742
GOCC name	melanosome	58	0.333118	1.32017e-05	0.000704718	0.315735	0.339791
GOCC name	nuclear pore	50	0.358216	1.33084e-05	0.000678124	0.307291	0.372529
GOBP name	regulation of glucose transport	22	0.537699	1.33777e-05	0.00232878	0.448529	0.458875
GOMF name	molecular_function	117	-0.2348	1.53382e-05	0.00186589	-0.364802	-0.17287
GOBP name	chromatin remodeling	18	0.588484	1.61315e-05	0.00273615	0.569902	0.617885
GOBP name	fatty acid beta-oxidation	29	-0.463884	1.64639e-05	0.00272271	-0.547951	-0.623997
GOMF name	electron carrier activity	61	-0.318572	1.94592e-05	0.00225449	-0.396819	-0.221753
GOMF name	hydrolase activity	450	-0.124054	2.11364e-05	0.00233749	-0.173546	-0.0824788
GOCC name	membrane	1548	0.0821236	3.05505e-05	0.001489	0.0124559	0.0836606
GOCC name	precatalytic spliceosome	17	0.579351	3.68028e-05	0.001719	0.5244	0.492826
GOMF name	histone binding	26	0.467485	3.91109e-05	0.00413725	0.385778	0.526772
GOCC name	peroxisomal matrix	26	-0.466193	4.10824e-05	0.00184213	-0.537644	-0.603451
GOCC name	Cajal body	22	0.50581	4.21037e-05	0.00181532	0.430998	0.427684
GOBP name	mitotic nuclear envelope disassembly	27	0.456425	4.29009e-05	0.00692169	0.380235	0.455059
GOMF name	DNA helicase activity	10	0.737695	5.48049e-05	0.00555585	0.757149	0.74471
GOMF name	kinase activity	127	-0.208996	6.23502e-05	0.00606792	-0.21266	-0.212585
GOCC name	transcription export complex	10	0.732046	6.24805e-05	0.0025941	0.685141	0.678693
KEGG name	Tyrosine metabolism	18	-0.544836	6.53062e-05	0.00116399	-1.0864	-0.93871
GOBP name	cytoplasmic translation	18	0.542429	7.03411e-05	0.0110787	0.454688	0.420415
GOMF name	receptor binding	78	-0.262621	7.14281e-05	0.00668402	-0.349718	-0.277753
GOBP name	regulation of alternative mRNA splicing, via spliceosome	16	0.574011	7.27391e-05	0.01119	0.4855	0.527064
GOBP name	protein import into nucleus	31	0.413032	7.34609e-05	0.0110442	0.364035	0.452962
GOMF name	oxidoreductase activity, acting on the CH-CH group of donors	17	-0.554382	7.8535e-05	0.00707687	-0.633334	-0.521783
GOCC name	nucleosome	12	0.65816	8.09462e-05	0.00324074	0.605139	0.723802
GOMF name	nucleosomal DNA binding	14	0.608771	8.25833e-05	0.0071759	0.456248	0.615104
GOMF name	transcription corepressor activity	32	0.402353	8.72697e-05	0.00732163	0.394239	0.581463
GOBP name	phosphorylation	131	-0.201019	9.27688e-05	0.013637	-0.201004	-0.212585
GOBP name	lipid metabolic process	158	-0.183777	9.28108e-05	0.0133466	-0.277507	-0.21944
GOBP name	maturation of LSU-rRNA	11	0.677298	0.000102724	0.0144578	0.636416	0.483557
GOBP name	response to zinc ion	9	-0.748519	0.000102824	0.0141704	-1.54375	-1.59422
KEGG name	Histidine metabolism	13	-0.622196	0.000105409	0.00177438	-0.776518	-0.533339
GOCC name	U12-type spliceosomal complex	16	0.560696	0.000106574	0.00411962	0.497627	0.51201
GOMF name	monooxygenase activity	10	-0.70732	0.000109721	0.00889834	-1.4507	-1.50807
GOCC name	focal adhesion	208	0.158921	0.000118682	0.00443477	0.111533	0.204924
GOCC name	cytosolic small ribosomal subunit	37	0.366596	0.000122441	0.00442762	0.29051	0.3321
GOBP name	fatty acid beta-oxidation using acyl-CoA dehydrogenase	14	-0.592573	0.000127092	0.0171574	-0.650294	-0.528345
KEGG name	Glycine, serine and threonine metabolism	22	-0.47308	0.000127832	0.00203858	-0.836045	-0.649974
GOCC name	U2 snRNP	16	0.551241	0.000139093	0.00487261	0.491894	0.515091
GOBP name	transcription initiation from RNA polymerase II promoter	25	0.43956	0.000149163	0.0197343	0.381995	0.415692
GOMF name	ATP-dependent DNA helicase activity	14	0.585319	0.000153637	0.012058	0.551497	0.552556
GOCC name	condensed chromosome	11	0.659006	0.000157353	0.00534522	0.635769	0.672831
GOCC name	nuclear matrix	31	0.383066	0.00023587	0.00777678	0.331737	0.395244
KEGG name	beta-Alanine metabolism	20	-0.473671	0.000254238	0.00385171	-0.620135	-0.526974
GOCC name	transcription factor complex	29	0.39268	0.000265468	0.00850257	0.362903	0.437706
KEGG name	Drug metabolism - other enzymes	15	-0.531852	0.000371474	0.00535984	-1.10833	-1.09384
KEGG level_2	Infectious diseases_Viral	182	0.156105	0.000384528	0.0014682	0.117935	0.150965
GOCC name	chaperonin-containing T-complex	7	0.773847	0.0003969	0.012359	0.665983	0.662742
GOCC name	nuclear envelope	72	0.240235	0.00047672	0.0144433	0.17164	0.283633
GOCC name	cell surface	88	0.217041	0.000499299	0.0147293	0.175815	0.242177
GOCC name	cytosol	1283	-0.0705128	0.000510091	0.0146618	-0.0988948	0.00915051
GOCC name	nuclear chromatin	38	0.327105	0.00051486	0.0144289	0.290638	0.476573
KEGG name	Insulin signaling pathway	48	-0.288692	0.000582063	0.0080166	-0.336712	-0.286522
GOCC name	MLL1 complex	9	0.656967	0.000652505	0.0178404	0.551816	0.475918
GOCC name	paraspeckles	6	0.803589	0.000659444	0.0176009	0.76982	0.833352
KEGG level_1	Cellular Processes	440	-0.0997533	0.00070694	0.00141388	-0.114856	-0.0670898
KEGG name	Starch and sucrose metabolism	15	-0.498336	0.000852239	0.0112273	-0.781642	-0.574711
KEGG name	Ascorbate and aldarate metabolism	10	-0.607723	0.000889355	0.0112281	-0.774302	-0.575351
KEGG name	Viral carcinogenesis	60	0.241131	0.00134297	0.0162768	0.21629	0.182088
KEGG name	Arachidonic acid metabolism	12	-0.529075	0.00153218	0.0178558	-1.0722	-1.10629
KEGG name	RNA polymerase	14	0.487882	0.00160488	0.0180103	0.4536	0.447274
KEGG name	Alanine, aspartate and glutamate metabolism	23	-0.373973	0.0019633	0.0198293	-0.611318	-0.279431
KEGG level_2	Cellular community	137	-0.146481	0.00361231	0.0126431	-0.14231	-0.141014

## Sheet: 2D aE
Table S6-3. 2D annotation enrichment analysis using protein copy no ratios (log10) between HepaRG cells vs PHH and HepG2 cells vs PHH
Only annotations with a BH-FDR < 4% were retained
annotation score HepaRG/PHH	annotation score HepG2/PHH	Type	Size	P value	Benj. Hoch. FDR	Names
0.0271879	0.284045	GOCC name	872	0	0	nucleoplasm
0.0683902	0.444109	GOMF name	662	0	0	poly(A) RNA binding
0.0677813	0.375549	GOMF name	392	0	0	RNA binding
0.164085	0.494739	GOCC name	233	0	0	intracellular ribonucleoprotein complex
0.0811627	0.218742	GOCC name	1444	3.10862e-15	1.16159e-12	nucleus
0.131706	0.560129	GOBP name	142	2.22045e-16	1.46883e-12	mRNA splicing, via spliceosome
-0.0159218	0.343935	GOCC name	306	7.32747e-15	2.05352e-12	nucleolus
0.0669413	0.481034	GOBP name	172	4.44089e-15	1.46883e-11	mRNA processing
0.143022	0.490709	GOCC name	143	9.96536e-13	2.23423e-10	ribosome
0.0514156	0.502474	GOBP name	131	4.1922e-13	9.24381e-10	rRNA processing
0.100261	0.482379	GOBP name	147	6.98552e-13	1.15523e-09	RNA splicing
0.0315733	0.36657	GOMF name	235	2.5735e-12	2.08711e-09	DNA binding
0.0530974	0.385892	GOMF name	210	5.41833e-12	3.2957e-09	nucleic acid binding
0.13889	0.488651	GOMF name	125	2.89626e-11	1.40932e-08	structural constituent of ribosome
0.12791	0.5586	GOCC name	89	8.57139e-11	1.60142e-08	spliceosomal complex
0.16643	0.551398	KEGG name	94	6.68012e-11	2.02408e-08	Spliceosome
0.103047	0.616278	GOCC name	59	3.35937e-09	4.70732e-07	catalytic step 2 spliceosome
0.148601	-0.0275834	GOCC name	1167	3.24805e-09	5.20151e-07	extracellular exosome
-0.0534678	0.484466	GOCC name	78	5.00651e-09	6.23588e-07	nuclear speck
0.154883	0.46622	KEGG name	107	4.68942e-09	7.10447e-07	Ribosome
-0.197602	0.0314725	GOCC name	502	7.28986e-09	8.17194e-07	integral component of membrane
-0.0977214	0.0821236	GOCC name	1548	8.28878e-09	8.44702e-07	membrane
-0.0876253	-0.221635	KEGG name	510	1.17278e-08	1.18451e-06	Metabolic pathways
0.0715521	0.33591	GOBP name	225	1.13882e-09	1.50666e-06	translation
0.214642	0.581052	GOBP name	66	8.18811e-09	9.02739e-06	mitochondrial translational elongation
0.225958	0.570407	GOBP name	65	1.92753e-08	1.82152e-05	mitochondrial translational termination
-0.148676	-0.296088	GOMF name	224	9.34568e-08	3.78967e-05	oxidoreductase activity
0.00961215	0.42515	GOCC name	84	4.62754e-07	4.32289e-05	chromosome
-0.162964	-0.256204	GOBP name	281	1.24922e-07	0.000103295	oxidation-reduction process
0.056255	0.138716	GOMF name	1790	4.66875e-07	0.000162273	protein binding
0.0681448	0.425565	GOBP name	93	3.41496e-07	0.000250999	viral transcription
-0.100944	-0.299986	GOBP name	196	5.08283e-07	0.000336229	metabolic process
0.0781236	-0.0705128	GOCC name	1283	4.09596e-06	0.000353198	cytosol
0.0843549	0.490262	GOBP name	64	1.06657e-06	0.000641399	mRNA export from nucleus
0.230555	0.364423	GOCC name	94	8.11909e-06	0.000650107	extracellular matrix
-0.0475742	-0.168349	GOMF name	631	2.3207e-06	0.000705782	metal ion binding
0.0189568	0.48979	GOCC name	49	9.47854e-06	0.000708363	nuclear chromosome, telomeric region
-0.464246	-0.737131	KEGG name	22	1.04105e-05	0.000788592	Drug metabolism - cytochrome P450
-0.119981	-0.262167	GOMF name	221	3.11453e-06	0.000841962	catalytic activity
-0.313824	0.723353	GOCC name	14	1.27638e-05	0.000894261	small-subunit processome
-0.153246	-0.248395	GOCC name	194	1.8366e-05	0.00121107	mitochondrial matrix
0.109354	0.242259	GOBP name	264	2.93312e-06	0.00161688	transcription, DNA-templated
-0.269597	-0.418052	GOCC name	62	2.79501e-05	0.00174067	peroxisome
-0.351062	-0.670576	KEGG name	25	3.09521e-05	0.00187569	Chemical carcinogenesis
-0.109695	-0.116913	GOCC name	776	3.36106e-05	0.00198303	mitochondrion
-0.25882	-0.679038	KEGG name	23	6.67072e-05	0.00288747	Metabolism of xenobiotics by cytochrome P450
-0.241609	-0.459382	KEGG name	50	5.7572e-05	0.00290739	Peroxisome
-0.025955	0.564589	GOBP name	36	6.12607e-06	0.00311723	ribosome biogenesis
0.0346784	0.310163	KEGG name	101	9.41025e-05	0.00356413	RNA transport
0.0597987	-0.0644911	GOCC name	1796	6.76743e-05	0.00379314	cytoplasm
0.22928	-0.115225	GOCC name	110	7.40173e-05	0.00395112	lysosome
-0.0427957	0.469903	GOBP name	48	9.96504e-06	0.00439458	protein sumoylation
0.290849	0.69738	GOCC name	21	8.85186e-05	0.00451043	mitochondrial large ribosomal subunit
0.0692052	0.751401	GOBP name	21	1.1203e-05	0.00463176	nucleosome assembly
0.0927778	0.461477	GOBP name	60	9.86046e-06	0.00465907	mRNA transport
-0.176613	-0.484767	KEGG name	40	0.000182017	0.0061279	Valine, leucine and isoleucine degradation
0.0801166	0.219845	GOBP name	273	1.82324e-05	0.00709456	regulation of transcription, DNA-templated
0.15523	0.575824	GOBP name	36	2.19375e-05	0.00806202	mRNA 3'-end processing
-0.141048	-0.171029	GOMF name	342	3.7849e-05	0.00837151	transferase activity
-0.116572	0.366635	GOMF name	56	3.50991e-05	0.00853962	helicase activity
0.0566761	0.374309	GOBP name	82	2.45382e-05	0.00854316	SRP-dependent cotranslational protein targeting to membrane
0.188187	0.696619	GOCC name	19	0.00018706	0.00911713	preribosome, large subunit precursor
0.122	0.564081	GOBP name	36	2.82595e-05	0.00934684	RNA export from nucleus
0.284103	0.588179	GOBP name	33	3.08943e-05	0.00973171	gene expression
0.34263	0.660579	KEGG name	19	0.000350913	0.0106327	DNA replication
-0.496125	-0.0508006	GOCC name	34	0.000244317	0.0114116	mitochondrial respiratory chain complex I
-0.173531	0.00707682	GOCC name	267	0.000269555	0.0120868	endoplasmic reticulum membrane
0.201134	0.529964	GOBP name	40	4.22423e-05	0.0127015	termination of RNA polymerase II transcription
0.022898	0.445251	KEGG name	37	0.000493113	0.013583	Ribosome biogenesis in eukaryotes
-0.434764	-0.644851	KEGG name	17	0.0005967	0.0139077	Retinol metabolism
-0.329942	-0.130477	KEGG name	74	0.000564013	0.0142413	Non-alcoholic fatty liver disease (NAFLD)
-0.284674	-0.556665	KEGG name	24	0.000730841	0.0158175	Tryptophan metabolism
-0.252411	-0.386324	GOBP name	67	5.5562e-05	0.0159801	fatty acid metabolic process
-0.0963476	0.666988	GOBP name	18	8.00299e-05	0.0220583	positive regulation of gene expression, epigenetic
-0.539951	-0.0601436	GOMF name	32	0.000110703	0.0224451	NADH dehydrogenase (ubiquinone) activity
0.0182709	0.338348	GOMF name	79	0.000120838	0.0226154	chromatin binding
-0.414422	-0.0483252	GOCC name	44	0.0005279	0.0227606	respiratory chain
-0.120064	0.50581	GOCC name	22	0.000561173	0.0232991	Cajal body
-0.0455379	-0.21513	GOCC name	172	0.000628129	0.0251476	endosome
0.192482	0.4588	KEGG name	33	0.00126238	0.0255001	Cell cycle
0.116447	0.396891	GOCC name	49	0.000687996	0.0265946	cytosolic large ribosomal subunit
-0.216893	-0.440306	KEGG name	34	0.00155088	0.0293698	Fatty acid degradation
0.0947238	0.492369	GOBP name	40	0.00011142	0.0294818	DNA replication
-0.194104	-0.43597	KEGG name	34	0.00183578	0.0327202	Arginine and proline metabolism
0.159209	0.577173	GOCC name	22	0.000883275	0.033005	mitochondrial small ribosomal subunit
0.125977	0.39529	GOMF name	59	0.000215654	0.0374777	mRNA binding
0.156541	0.158921	GOCC name	208	0.00103678	0.0374914	focal adhesion
0.0352024	0.284939	GOBP name	114	0.000149516	0.0380403	translational initiation
-0.391185	-0.466193	GOCC name	26	0.00109605	0.0383959	peroxisomal matrix
-0.508655	-0.0604964	GOBP name	34	0.000180729	0.0426972	mitochondrial electron transport, NADH to ubiquinone
0.459734	0.579351	GOCC name	17	0.00127295	0.0432416	precatalytic spliceosome
-0.433227	-0.492116	GOMF name	28	0.000268877	0.0436119	pyridoxal phosphate binding
0.052893	0.409776	GOBP name	53	0.000179541	0.0439875	gene silencing by RNA
0.0379009	0.358216	GOCC name	50	0.0013786	0.0454533	nuclear pore
0.786701	-0.560257	GOMF name	6	0.000312361	0.0474984	calcium-dependent cysteine-type endopeptidase activity
0.314277	0.0392648	KEGG name	57	0.00290445	0.0488916	Lysosome
